# Supplementary material for: BnAP2-12 overexpression delays ramie flowering: evidence from AP2/ERF gene expression
Source: Front Plant Sci. 2024 Mar 25;15:1367837. doi: 10.3389/fpls.2024.1367837 (PMC10999622; doi:10.3389/fpls.2024.1367837)
Supplement: Supplementary file 11 [file Table_1.xlsx]

## Sheet: Sheet1
Table S1 Statistical data on the flowering stage of GBN-08 and GBN-09 in the field.
		Flowering time	The first male flower node	The first female flower node	Number of male flowers	Number of female flowers	Total number of flowers
GBN-08	2017	45048	10.8	24.4	10.7	12.9	23.6
		45155	11.4	20.2	12.7	15.7	28.4
		45196	10.6	19.6	10.2	12.1	23.3
	2018	45061	11.6	21.4	12.3	19.6	31.9
		45148	10.4	18.8	9.6	12.4	22
		45197	12.4	22.2	10.2	10.4	22
GNB-09	2017	45034	/	13.2	/	21.2	21.2
		45135	/	15.6	/	18	18
		45179	/	12.6	/	22.8	22.8
	2018	45042	/	15	/	19.6	19.6
		45130	/	11.2	/	20.8	20.8
		45183	/	12.4	/	18.4	18.4
