# Supplementary material for: BnAP2-12 overexpression delays ramie flowering: evidence from AP2/ERF gene expression
Source: Front Plant Sci. 2024 Mar 25;15:1367837. doi: 10.3389/fpls.2024.1367837 (PMC10999622; doi:10.3389/fpls.2024.1367837)
Supplement: Supplementary file 12 [file Table_2.xlsx]

## Sheet: plantCARE_output_PlantCARE_2643
Table S2 Cis-elements in the promoters of putative AP2/ERF genes in B.nivea.
Gene ID	Site Name	Sequence	Position	Matrix score	Strand	Organism	Function description	Function label	Function label2
BnAP2-1	ABRE	ACGTG	433	5	-	Arabidopsis thaliana	cis-acting element involved in the abscisic acid responsiveness	ABA responsiveness	Hormone
BnAP2-1	ABRE	CGTACGTGCA	865	9	-	Hordeum vulgare	cis-acting element involved in the abscisic acid responsiveness	ABA responsiveness	Hormone
BnAP2-1	ABRE	ACGTG	867	5	-	Arabidopsis thaliana	cis-acting element involved in the abscisic acid responsiveness	ABA responsiveness	Hormone
BnAP2-11	ABRE	ACGTG	1547	5	-	Arabidopsis thaliana	cis-acting element involved in the abscisic acid responsiveness	ABA responsiveness	Hormone
BnAP2-12	ABRE	ACGTG	208	5	-	Arabidopsis thaliana	cis-acting element involved in the abscisic acid responsiveness	ABA responsiveness	Hormone
BnAP2-12	ABRE	CGCACGTGTC	1309	9	+	Hordeum vulgare	cis-acting element involved in the abscisic acid responsiveness	ABA responsiveness	Hormone
BnAP2-12	ABRE	CACGTG	1311	6	-	Arabidopsis thaliana	cis-acting element involved in the abscisic acid responsiveness	ABA responsiveness	Hormone
BnAP2-12	ABRE	ACGTG	1312	5	+	Arabidopsis thaliana	cis-acting element involved in the abscisic acid responsiveness	ABA responsiveness	Hormone
BnAP2-12	ABRE	ACGTG	1521	5	+	Arabidopsis thaliana	cis-acting element involved in the abscisic acid responsiveness	ABA responsiveness	Hormone
BnAP2-13	ABRE	ACGTG	1155	5	+	Arabidopsis thaliana	cis-acting element involved in the abscisic acid responsiveness	ABA responsiveness	Hormone
BnAP2-14	ABRE	ACGTG	577	5	-	Arabidopsis thaliana	cis-acting element involved in the abscisic acid responsiveness	ABA responsiveness	Hormone
BnAP2-14	ABRE	TACGGTC	1990	7	+	Arabidopsis thaliana	cis-acting element involved in the abscisic acid responsiveness	ABA responsiveness	Hormone
BnAP2-15	ABRE	ACGTG	1486	5	-	Arabidopsis thaliana	cis-acting element involved in the abscisic acid responsiveness	ABA responsiveness	Hormone
BnAP2-16	ABRE	CACGTG	778	6	+	Arabidopsis thaliana	cis-acting element involved in the abscisic acid responsiveness	ABA responsiveness	Hormone
BnAP2-16	ABRE	ACGTG	779	5	+	Arabidopsis thaliana	cis-acting element involved in the abscisic acid responsiveness	ABA responsiveness	Hormone
BnAP2-17	ABRE	ACGTG	98	5	-	Arabidopsis thaliana	cis-acting element involved in the abscisic acid responsiveness	ABA responsiveness	Hormone
BnAP2-17	ABRE	ACGTG	353	5	-	Arabidopsis thaliana	cis-acting element involved in the abscisic acid responsiveness	ABA responsiveness	Hormone
BnAP2-17	ABRE	ACGTG	1757	5	+	Arabidopsis thaliana	cis-acting element involved in the abscisic acid responsiveness	ABA responsiveness	Hormone
BnAP2-18	ABRE	ACGTG	243	5	-	Arabidopsis thaliana	cis-acting element involved in the abscisic acid responsiveness	ABA responsiveness	Hormone
BnAP2-18	ABRE	ACGTG	1486	5	-	Arabidopsis thaliana	cis-acting element involved in the abscisic acid responsiveness	ABA responsiveness	Hormone
BnAP2-2	ABRE	ACGTG	973	5	+	Arabidopsis thaliana	cis-acting element involved in the abscisic acid responsiveness	ABA responsiveness	Hormone
BnAP2-3	ABRE	ACGTG	430	5	+	Arabidopsis thaliana	cis-acting element involved in the abscisic acid responsiveness	ABA responsiveness	Hormone
BnAP2-4	ABRE	ACGTG	714	5	+	Arabidopsis thaliana	cis-acting element involved in the abscisic acid responsiveness	ABA responsiveness	Hormone
BnAP2-5	ABRE	CACGTG	1142	6	-	Arabidopsis thaliana	cis-acting element involved in the abscisic acid responsiveness	ABA responsiveness	Hormone
BnAP2-5	ABRE	ACGTG	1143	5	+	Arabidopsis thaliana	cis-acting element involved in the abscisic acid responsiveness	ABA responsiveness	Hormone
BnAP2-5	ABRE	GCAACGTGTC	1741	9	-	Hordeum vulgare	cis-acting element involved in the abscisic acid responsiveness	ABA responsiveness	Hormone
BnAP2-5	ABRE	ACGTG	1743	5	-	Arabidopsis thaliana	cis-acting element involved in the abscisic acid responsiveness	ABA responsiveness	Hormone
BnAP2-6	ABRE	CACGTG	1142	6	-	Arabidopsis thaliana	cis-acting element involved in the abscisic acid responsiveness	ABA responsiveness	Hormone
BnAP2-6	ABRE	ACGTG	1143	5	+	Arabidopsis thaliana	cis-acting element involved in the abscisic acid responsiveness	ABA responsiveness	Hormone
BnAP2-6	ABRE	GCAACGTGTC	1741	9	-	Hordeum vulgare	cis-acting element involved in the abscisic acid responsiveness	ABA responsiveness	Hormone
BnAP2-6	ABRE	ACGTG	1743	5	-	Arabidopsis thaliana	cis-acting element involved in the abscisic acid responsiveness	ABA responsiveness	Hormone
BnAP2-7	ABRE	ACGTG	427	5	-	Arabidopsis thaliana	cis-acting element involved in the abscisic acid responsiveness	ABA responsiveness	Hormone
BnAP2-7	ABRE	GCAACGTGTC	795	9	+	Hordeum vulgare	cis-acting element involved in the abscisic acid responsiveness	ABA responsiveness	Hormone
BnAP2-7	ABRE	ACGTG	798	5	+	Arabidopsis thaliana	cis-acting element involved in the abscisic acid responsiveness	ABA responsiveness	Hormone
BnAP2-7	ABRE	GCAACGTGTC	969	9	+	Hordeum vulgare	cis-acting element involved in the abscisic acid responsiveness	ABA responsiveness	Hormone
BnAP2-7	ABRE	ACGTG	972	5	+	Arabidopsis thaliana	cis-acting element involved in the abscisic acid responsiveness	ABA responsiveness	Hormone
BnAP2-7	ABRE	ACGTG	995	5	-	Arabidopsis thaliana	cis-acting element involved in the abscisic acid responsiveness	ABA responsiveness	Hormone
BnAP2-7	ABRE	GCAACGTGTC	1832	9	-	Hordeum vulgare	cis-acting element involved in the abscisic acid responsiveness	ABA responsiveness	Hormone
BnAP2-7	ABRE	GACACGTGGC	1968	9	+	Triticum aestivum	cis-acting element involved in the abscisic acid responsiveness	ABA responsiveness	Hormone
BnAP2-8	ABRE	TACGGTC	1726	7	+	Arabidopsis thaliana	cis-acting element involved in the abscisic acid responsiveness	ABA responsiveness	Hormone
BnAP2-9	ABRE	ACGTG	1420	5	-	Arabidopsis thaliana	cis-acting element involved in the abscisic acid responsiveness	ABA responsiveness	Hormone
BnDREB-1	ABRE	CACGTG	1717	6	-	Arabidopsis thaliana	cis-acting element involved in the abscisic acid responsiveness	ABA responsiveness	Hormone
BnDREB-1	ABRE	ACGTG	1718	5	+	Arabidopsis thaliana	cis-acting element involved in the abscisic acid responsiveness	ABA responsiveness	Hormone
BnDREB-1	ABRE	ACGTG	1752	5	+	Arabidopsis thaliana	cis-acting element involved in the abscisic acid responsiveness	ABA responsiveness	Hormone
BnDREB-1	ABRE	ACGTG	1798	5	-	Arabidopsis thaliana	cis-acting element involved in the abscisic acid responsiveness	ABA responsiveness	Hormone
BnDREB-1	ABRE	CACGTG	1830	6	-	Arabidopsis thaliana	cis-acting element involved in the abscisic acid responsiveness	ABA responsiveness	Hormone
BnDREB-1	ABRE	ACGTG	1831	5	+	Arabidopsis thaliana	cis-acting element involved in the abscisic acid responsiveness	ABA responsiveness	Hormone
BnDREB-10	ABRE	ACGTG	115	5	+	Arabidopsis thaliana	cis-acting element involved in the abscisic acid responsiveness	ABA responsiveness	Hormone
BnDREB-10	ABRE	ACGTG	171	5	-	Arabidopsis thaliana	cis-acting element involved in the abscisic acid responsiveness	ABA responsiveness	Hormone
BnDREB-10	ABRE	CACGTG	1115	6	-	Arabidopsis thaliana	cis-acting element involved in the abscisic acid responsiveness	ABA responsiveness	Hormone
BnDREB-10	ABRE	ACGTG	1116	5	+	Arabidopsis thaliana	cis-acting element involved in the abscisic acid responsiveness	ABA responsiveness	Hormone
BnDREB-10	ABRE	TACGGTC	1167	7	-	Arabidopsis thaliana	cis-acting element involved in the abscisic acid responsiveness	ABA responsiveness	Hormone
BnDREB-10	ABRE	ACGTG	1189	5	-	Arabidopsis thaliana	cis-acting element involved in the abscisic acid responsiveness	ABA responsiveness	Hormone
BnDREB-10	ABRE	ACGTG	1684	5	-	Arabidopsis thaliana	cis-acting element involved in the abscisic acid responsiveness	ABA responsiveness	Hormone
BnDREB-11	ABRE	ACGTG	951	5	+	Arabidopsis thaliana	cis-acting element involved in the abscisic acid responsiveness	ABA responsiveness	Hormone
BnDREB-11	ABRE	ACGTG	1702	5	+	Arabidopsis thaliana	cis-acting element involved in the abscisic acid responsiveness	ABA responsiveness	Hormone
BnDREB-11	ABRE	ACGTG	1828	5	-	Arabidopsis thaliana	cis-acting element involved in the abscisic acid responsiveness	ABA responsiveness	Hormone
BnDREB-11	ABRE	CACGTG	1910	6	-	Arabidopsis thaliana	cis-acting element involved in the abscisic acid responsiveness	ABA responsiveness	Hormone
BnDREB-11	ABRE	ACGTG	1911	5	+	Arabidopsis thaliana	cis-acting element involved in the abscisic acid responsiveness	ABA responsiveness	Hormone
BnDREB-11	ABRE	CACGTG	1932	6	-	Arabidopsis thaliana	cis-acting element involved in the abscisic acid responsiveness	ABA responsiveness	Hormone
BnDREB-11	ABRE	ACGTG	1933	5	+	Arabidopsis thaliana	cis-acting element involved in the abscisic acid responsiveness	ABA responsiveness	Hormone
BnDREB-12	ABRE	CACGTG	930	6	+	Arabidopsis thaliana	cis-acting element involved in the abscisic acid responsiveness	ABA responsiveness	Hormone
BnDREB-12	ABRE	ACGTG	931	5	+	Arabidopsis thaliana	cis-acting element involved in the abscisic acid responsiveness	ABA responsiveness	Hormone
BnDREB-12	ABRE	CACGTG	1588	6	-	Arabidopsis thaliana	cis-acting element involved in the abscisic acid responsiveness	ABA responsiveness	Hormone
BnDREB-12	ABRE	ACGTG	1589	5	+	Arabidopsis thaliana	cis-acting element involved in the abscisic acid responsiveness	ABA responsiveness	Hormone
BnDREB-12	ABRE	GCAACGTGTC	1661	9	+	Hordeum vulgare	cis-acting element involved in the abscisic acid responsiveness	ABA responsiveness	Hormone
BnDREB-12	ABRE	CACGTG	1663	6	-	Arabidopsis thaliana	cis-acting element involved in the abscisic acid responsiveness	ABA responsiveness	Hormone
BnDREB-12	ABRE	ACGTG	1664	5	+	Arabidopsis thaliana	cis-acting element involved in the abscisic acid responsiveness	ABA responsiveness	Hormone
BnDREB-13	ABRE	AACCCGG	777	7	-	Arabidopsis thaliana	cis-acting element involved in the abscisic acid responsiveness	ABA responsiveness	Hormone
BnDREB-13	ABRE	CGTACGTGCA	1488	9	-	Hordeum vulgare	cis-acting element involved in the abscisic acid responsiveness	ABA responsiveness	Hormone
BnDREB-13	ABRE	ACGTG	1937	5	-	Arabidopsis thaliana	cis-acting element involved in the abscisic acid responsiveness	ABA responsiveness	Hormone
BnDREB-14	ABRE	CACGTG	33	6	+	Arabidopsis thaliana	cis-acting element involved in the abscisic acid responsiveness	ABA responsiveness	Hormone
BnDREB-14	ABRE	ACGTG	34	5	+	Arabidopsis thaliana	cis-acting element involved in the abscisic acid responsiveness	ABA responsiveness	Hormone
BnDREB-14	ABRE	ACGTG	196	5	-	Arabidopsis thaliana	cis-acting element involved in the abscisic acid responsiveness	ABA responsiveness	Hormone
BnDREB-15	ABRE	GCCGCGTGGC	1120	9	+	Oryza sativa	cis-acting element involved in the abscisic acid responsiveness	ABA responsiveness	Hormone
BnDREB-16	ABRE	ACGTG	1333	5	-	Arabidopsis thaliana	cis-acting element involved in the abscisic acid responsiveness	ABA responsiveness	Hormone
BnDREB-17	ABRE	ACGTG	609	5	+	Arabidopsis thaliana	cis-acting element involved in the abscisic acid responsiveness	ABA responsiveness	Hormone
BnDREB-17	ABRE	ACGTG	1088	5	-	Arabidopsis thaliana	cis-acting element involved in the abscisic acid responsiveness	ABA responsiveness	Hormone
BnDREB-18	ABRE	ACGTG	1094	5	-	Arabidopsis thaliana	cis-acting element involved in the abscisic acid responsiveness	ABA responsiveness	Hormone
BnDREB-18	ABRE	ACGTG	1493	5	+	Arabidopsis thaliana	cis-acting element involved in the abscisic acid responsiveness	ABA responsiveness	Hormone
BnDREB-19	ABRE	CACGTG	22	6	+	Arabidopsis thaliana	cis-acting element involved in the abscisic acid responsiveness	ABA responsiveness	Hormone
BnDREB-19	ABRE	ACGTG	23	5	+	Arabidopsis thaliana	cis-acting element involved in the abscisic acid responsiveness	ABA responsiveness	Hormone
BnDREB-19	ABRE	ACGTG	46	5	+	Arabidopsis thaliana	cis-acting element involved in the abscisic acid responsiveness	ABA responsiveness	Hormone
BnDREB-19	ABRE	CACGTG	192	6	+	Arabidopsis thaliana	cis-acting element involved in the abscisic acid responsiveness	ABA responsiveness	Hormone
BnDREB-19	ABRE	ACGTG	193	5	+	Arabidopsis thaliana	cis-acting element involved in the abscisic acid responsiveness	ABA responsiveness	Hormone
BnDREB-19	ABRE	ACGTG	671	5	+	Arabidopsis thaliana	cis-acting element involved in the abscisic acid responsiveness	ABA responsiveness	Hormone
BnDREB-19	ABRE	ACGTG	737	5	+	Arabidopsis thaliana	cis-acting element involved in the abscisic acid responsiveness	ABA responsiveness	Hormone
BnDREB-19	ABRE	ACGTG	1448	5	-	Arabidopsis thaliana	cis-acting element involved in the abscisic acid responsiveness	ABA responsiveness	Hormone
BnDREB-2	ABRE	ACGTG	402	5	-	Arabidopsis thaliana	cis-acting element involved in the abscisic acid responsiveness	ABA responsiveness	Hormone
BnDREB-2	ABRE	TACGGTC	557	7	+	Arabidopsis thaliana	cis-acting element involved in the abscisic acid responsiveness	ABA responsiveness	Hormone
BnDREB-2	ABRE	ACGTG	1504	5	+	Arabidopsis thaliana	cis-acting element involved in the abscisic acid responsiveness	ABA responsiveness	Hormone
BnDREB-20	ABRE	ACGTG	905	5	+	Arabidopsis thaliana	cis-acting element involved in the abscisic acid responsiveness	ABA responsiveness	Hormone
BnDREB-21	ABRE	ACGTG	1754	5	+	Arabidopsis thaliana	cis-acting element involved in the abscisic acid responsiveness	ABA responsiveness	Hormone
BnDREB-3	ABRE	ACGTG	200	5	-	Arabidopsis thaliana	cis-acting element involved in the abscisic acid responsiveness	ABA responsiveness	Hormone
BnDREB-3	ABRE	ACGTG	209	5	+	Arabidopsis thaliana	cis-acting element involved in the abscisic acid responsiveness	ABA responsiveness	Hormone
BnDREB-3	ABRE	ACGTG	793	5	+	Arabidopsis thaliana	cis-acting element involved in the abscisic acid responsiveness	ABA responsiveness	Hormone
BnDREB-4	ABRE	ACGTG	339	5	-	Arabidopsis thaliana	cis-acting element involved in the abscisic acid responsiveness	ABA responsiveness	Hormone
BnDREB-4	ABRE	ACGTG	1035	5	+	Arabidopsis thaliana	cis-acting element involved in the abscisic acid responsiveness	ABA responsiveness	Hormone
BnDREB-4	ABRE	ACGTG	1047	5	-	Arabidopsis thaliana	cis-acting element involved in the abscisic acid responsiveness	ABA responsiveness	Hormone
BnDREB-4	ABRE	ACGTG	1090	5	+	Arabidopsis thaliana	cis-acting element involved in the abscisic acid responsiveness	ABA responsiveness	Hormone
BnDREB-4	ABRE	ACGTG	1780	5	+	Arabidopsis thaliana	cis-acting element involved in the abscisic acid responsiveness	ABA responsiveness	Hormone
BnDREB-5	ABRE	ACGTG	1500	5	-	Arabidopsis thaliana	cis-acting element involved in the abscisic acid responsiveness	ABA responsiveness	Hormone
BnDREB-6	ABRE	ACGTG	728	5	+	Arabidopsis thaliana	cis-acting element involved in the abscisic acid responsiveness	ABA responsiveness	Hormone
BnDREB-6	ABRE	GCAACGTGTC	771	9	-	Hordeum vulgare	cis-acting element involved in the abscisic acid responsiveness	ABA responsiveness	Hormone
BnDREB-6	ABRE	ACGTG	1244	5	-	Arabidopsis thaliana	cis-acting element involved in the abscisic acid responsiveness	ABA responsiveness	Hormone
BnDREB-7	ABRE	CGTACGTGCA	886	9	+	Hordeum vulgare	cis-acting element involved in the abscisic acid responsiveness	ABA responsiveness	Hormone
BnDREB-7	ABRE	ACGTG	889	5	+	Arabidopsis thaliana	cis-acting element involved in the abscisic acid responsiveness	ABA responsiveness	Hormone
BnDREB-7	ABRE	ACGTG	1377	5	+	Arabidopsis thaliana	cis-acting element involved in the abscisic acid responsiveness	ABA responsiveness	Hormone
BnDREB-7	ABRE	ACGTG	1728	5	-	Arabidopsis thaliana	cis-acting element involved in the abscisic acid responsiveness	ABA responsiveness	Hormone
BnDREB-8	ABRE	GACACGTGGC	269	9	+	Triticum aestivum	cis-acting element involved in the abscisic acid responsiveness	ABA responsiveness	Hormone
BnDREB-8	ABRE	CACGTG	271	6	+	Arabidopsis thaliana	cis-acting element involved in the abscisic acid responsiveness	ABA responsiveness	Hormone
BnDREB-8	ABRE	ACGTG	272	5	+	Arabidopsis thaliana	cis-acting element involved in the abscisic acid responsiveness	ABA responsiveness	Hormone
BnDREB-8	ABRE	CACGTG	1050	6	-	Arabidopsis thaliana	cis-acting element involved in the abscisic acid responsiveness	ABA responsiveness	Hormone
BnDREB-8	ABRE	ACGTG	1051	5	+	Arabidopsis thaliana	cis-acting element involved in the abscisic acid responsiveness	ABA responsiveness	Hormone
BnDREB-8	ABRE	ACGTG	1135	5	-	Arabidopsis thaliana	cis-acting element involved in the abscisic acid responsiveness	ABA responsiveness	Hormone
BnDREB-8	ABRE	CACGTG	1156	6	-	Arabidopsis thaliana	cis-acting element involved in the abscisic acid responsiveness	ABA responsiveness	Hormone
BnDREB-8	ABRE	ACGTG	1157	5	+	Arabidopsis thaliana	cis-acting element involved in the abscisic acid responsiveness	ABA responsiveness	Hormone
BnDREB-8	ABRE	ACGTG	1566	5	-	Arabidopsis thaliana	cis-acting element involved in the abscisic acid responsiveness	ABA responsiveness	Hormone
BnERF-1	ABRE	ACGTG	758	5	+	Arabidopsis thaliana	cis-acting element involved in the abscisic acid responsiveness	ABA responsiveness	Hormone
BnERF-1	ABRE	ACGTG	951	5	-	Arabidopsis thaliana	cis-acting element involved in the abscisic acid responsiveness	ABA responsiveness	Hormone
BnERF-1	ABRE	ACGTG	1671	5	+	Arabidopsis thaliana	cis-acting element involved in the abscisic acid responsiveness	ABA responsiveness	Hormone
BnERF-1	ABRE	GACACGTGGC	1692	9	-	Triticum aestivum	cis-acting element involved in the abscisic acid responsiveness	ABA responsiveness	Hormone
BnERF-1	ABRE	CACGTG	1694	6	-	Arabidopsis thaliana	cis-acting element involved in the abscisic acid responsiveness	ABA responsiveness	Hormone
BnERF-1	ABRE	ACGTG	1695	5	+	Arabidopsis thaliana	cis-acting element involved in the abscisic acid responsiveness	ABA responsiveness	Hormone
BnERF-11	ABRE	CACGTG	427	6	+	Arabidopsis thaliana	cis-acting element involved in the abscisic acid responsiveness	ABA responsiveness	Hormone
BnERF-11	ABRE	ACGTG	428	5	+	Arabidopsis thaliana	cis-acting element involved in the abscisic acid responsiveness	ABA responsiveness	Hormone
BnERF-11	ABRE	TACGTGTC	500	8	+	Oryza sativa	cis-acting element involved in the abscisic acid responsiveness	ABA responsiveness	Hormone
BnERF-11	ABRE	ACGTG	501	5	+	Arabidopsis thaliana	cis-acting element involved in the abscisic acid responsiveness	ABA responsiveness	Hormone
BnERF-11	ABRE	ACGTG	1034	5	+	Arabidopsis thaliana	cis-acting element involved in the abscisic acid responsiveness	ABA responsiveness	Hormone
BnERF-11	ABRE	ACGTG	1243	5	+	Arabidopsis thaliana	cis-acting element involved in the abscisic acid responsiveness	ABA responsiveness	Hormone
BnERF-12	ABRE	ACGTG	221	5	-	Arabidopsis thaliana	cis-acting element involved in the abscisic acid responsiveness	ABA responsiveness	Hormone
BnERF-12	ABRE	ACGTG	927	5	+	Arabidopsis thaliana	cis-acting element involved in the abscisic acid responsiveness	ABA responsiveness	Hormone
BnERF-12	ABRE	ACGTG	1362	5	-	Arabidopsis thaliana	cis-acting element involved in the abscisic acid responsiveness	ABA responsiveness	Hormone
BnERF-12	ABRE	ACGTG	1380	5	-	Arabidopsis thaliana	cis-acting element involved in the abscisic acid responsiveness	ABA responsiveness	Hormone
BnERF-12	ABRE	CACGTG	1385	6	-	Arabidopsis thaliana	cis-acting element involved in the abscisic acid responsiveness	ABA responsiveness	Hormone
BnERF-12	ABRE	ACGTG	1386	5	+	Arabidopsis thaliana	cis-acting element involved in the abscisic acid responsiveness	ABA responsiveness	Hormone
BnERF-12	ABRE	ACGTG	1607	5	-	Arabidopsis thaliana	cis-acting element involved in the abscisic acid responsiveness	ABA responsiveness	Hormone
BnERF-12	ABRE	GCAACGTGTC	1702	9	+	Hordeum vulgare	cis-acting element involved in the abscisic acid responsiveness	ABA responsiveness	Hormone
BnERF-12	ABRE	CACGTG	1704	6	-	Arabidopsis thaliana	cis-acting element involved in the abscisic acid responsiveness	ABA responsiveness	Hormone
BnERF-12	ABRE	ACGTG	1705	5	+	Arabidopsis thaliana	cis-acting element involved in the abscisic acid responsiveness	ABA responsiveness	Hormone
BnERF-12	ABRE	CACGTG	1799	6	-	Arabidopsis thaliana	cis-acting element involved in the abscisic acid responsiveness	ABA responsiveness	Hormone
BnERF-12	ABRE	ACGTG	1800	5	+	Arabidopsis thaliana	cis-acting element involved in the abscisic acid responsiveness	ABA responsiveness	Hormone
BnERF-12	ABRE	CACGTG	1851	6	-	Arabidopsis thaliana	cis-acting element involved in the abscisic acid responsiveness	ABA responsiveness	Hormone
BnERF-12	ABRE	ACGTG	1852	5	+	Arabidopsis thaliana	cis-acting element involved in the abscisic acid responsiveness	ABA responsiveness	Hormone
BnERF-13	ABRE	CACGTG	1811	6	-	Arabidopsis thaliana	cis-acting element involved in the abscisic acid responsiveness	ABA responsiveness	Hormone
BnERF-13	ABRE	ACGTG	1812	5	+	Arabidopsis thaliana	cis-acting element involved in the abscisic acid responsiveness	ABA responsiveness	Hormone
BnERF-13	ABRE	ACGTG	1859	5	-	Arabidopsis thaliana	cis-acting element involved in the abscisic acid responsiveness	ABA responsiveness	Hormone
BnERF-14	ABRE	CACGTG	1551	6	-	Arabidopsis thaliana	cis-acting element involved in the abscisic acid responsiveness	ABA responsiveness	Hormone
BnERF-14	ABRE	ACGTG	1552	5	+	Arabidopsis thaliana	cis-acting element involved in the abscisic acid responsiveness	ABA responsiveness	Hormone
BnERF-15	ABRE	ACGTG	192	5	-	Arabidopsis thaliana	cis-acting element involved in the abscisic acid responsiveness	ABA responsiveness	Hormone
BnERF-16	ABRE	ACGTG	236	5	+	Arabidopsis thaliana	cis-acting element involved in the abscisic acid responsiveness	ABA responsiveness	Hormone
BnERF-18	ABRE	ACGTG	887	5	-	Arabidopsis thaliana	cis-acting element involved in the abscisic acid responsiveness	ABA responsiveness	Hormone
BnERF-18	ABRE	TACGTGTC	1056	8	-	Oryza sativa	cis-acting element involved in the abscisic acid responsiveness	ABA responsiveness	Hormone
BnERF-18	ABRE	ACGTG	1058	5	-	Arabidopsis thaliana	cis-acting element involved in the abscisic acid responsiveness	ABA responsiveness	Hormone
BnERF-18	ABRE	TACGTGTC	1129	8	+	Oryza sativa	cis-acting element involved in the abscisic acid responsiveness	ABA responsiveness	Hormone
BnERF-18	ABRE	ACGTG	1130	5	+	Arabidopsis thaliana	cis-acting element involved in the abscisic acid responsiveness	ABA responsiveness	Hormone
BnERF-19	ABRE	ACGTG	178	5	+	Arabidopsis thaliana	cis-acting element involved in the abscisic acid responsiveness	ABA responsiveness	Hormone
BnERF-19	ABRE	ACGTG	238	5	+	Arabidopsis thaliana	cis-acting element involved in the abscisic acid responsiveness	ABA responsiveness	Hormone
BnERF-19	ABRE	ACGTG	258	5	-	Arabidopsis thaliana	cis-acting element involved in the abscisic acid responsiveness	ABA responsiveness	Hormone
BnERF-19	ABRE	ACGTG	1216	5	-	Arabidopsis thaliana	cis-acting element involved in the abscisic acid responsiveness	ABA responsiveness	Hormone
BnERF-2	ABRE	CACGTG	1642	6	-	Arabidopsis thaliana	cis-acting element involved in the abscisic acid responsiveness	ABA responsiveness	Hormone
BnERF-2	ABRE	ACGTG	1643	5	+	Arabidopsis thaliana	cis-acting element involved in the abscisic acid responsiveness	ABA responsiveness	Hormone
BnERF-24	ABRE	GCAACGTGTC	1584	9	-	Hordeum vulgare	cis-acting element involved in the abscisic acid responsiveness	ABA responsiveness	Hormone
BnERF-25	ABRE	ACGTG	150	5	+	Arabidopsis thaliana	cis-acting element involved in the abscisic acid responsiveness	ABA responsiveness	Hormone
BnERF-25	ABRE	ACGTG	219	5	-	Arabidopsis thaliana	cis-acting element involved in the abscisic acid responsiveness	ABA responsiveness	Hormone
BnERF-25	ABRE	ACGTG	685	5	-	Arabidopsis thaliana	cis-acting element involved in the abscisic acid responsiveness	ABA responsiveness	Hormone
BnERF-25	ABRE	ACGTG	1048	5	+	Arabidopsis thaliana	cis-acting element involved in the abscisic acid responsiveness	ABA responsiveness	Hormone
BnERF-25	ABRE	ACGTG	1120	5	-	Arabidopsis thaliana	cis-acting element involved in the abscisic acid responsiveness	ABA responsiveness	Hormone
BnERF-26	ABRE	ACGTG	31	5	+	Arabidopsis thaliana	cis-acting element involved in the abscisic acid responsiveness	ABA responsiveness	Hormone
BnERF-26	ABRE	GCAACGTGTC	47	9	-	Hordeum vulgare	cis-acting element involved in the abscisic acid responsiveness	ABA responsiveness	Hormone
BnERF-26	ABRE	CACGTG	49	6	+	Arabidopsis thaliana	cis-acting element involved in the abscisic acid responsiveness	ABA responsiveness	Hormone
BnERF-26	ABRE	ACGTG	50	5	+	Arabidopsis thaliana	cis-acting element involved in the abscisic acid responsiveness	ABA responsiveness	Hormone
BnERF-26	ABRE	GCAACGTGTC	70	9	-	Hordeum vulgare	cis-acting element involved in the abscisic acid responsiveness	ABA responsiveness	Hormone
BnERF-26	ABRE	CACGTG	72	6	+	Arabidopsis thaliana	cis-acting element involved in the abscisic acid responsiveness	ABA responsiveness	Hormone
BnERF-26	ABRE	ACGTG	73	5	+	Arabidopsis thaliana	cis-acting element involved in the abscisic acid responsiveness	ABA responsiveness	Hormone
BnERF-26	ABRE	GACACGTGGC	494	9	+	Triticum aestivum	cis-acting element involved in the abscisic acid responsiveness	ABA responsiveness	Hormone
BnERF-26	ABRE	ACGTG	560	5	-	Arabidopsis thaliana	cis-acting element involved in the abscisic acid responsiveness	ABA responsiveness	Hormone
BnERF-26	ABRE	ACGTG	809	5	-	Arabidopsis thaliana	cis-acting element involved in the abscisic acid responsiveness	ABA responsiveness	Hormone
BnERF-26	ABRE	GACACGTGGC	1614	9	-	Triticum aestivum	cis-acting element involved in the abscisic acid responsiveness	ABA responsiveness	Hormone
BnERF-27	ABRE	GCAACGTGTC	865	9	+	Hordeum vulgare	cis-acting element involved in the abscisic acid responsiveness	ABA responsiveness	Hormone
BnERF-27	ABRE	CACGTG	867	6	+	Arabidopsis thaliana	cis-acting element involved in the abscisic acid responsiveness	ABA responsiveness	Hormone
BnERF-27	ABRE	ACGTG	868	5	+	Arabidopsis thaliana	cis-acting element involved in the abscisic acid responsiveness	ABA responsiveness	Hormone
BnERF-27	ABRE	ACGTG	879	5	-	Arabidopsis thaliana	cis-acting element involved in the abscisic acid responsiveness	ABA responsiveness	Hormone
BnERF-29	ABRE	ACGTG	119	5	-	Arabidopsis thaliana	cis-acting element involved in the abscisic acid responsiveness	ABA responsiveness	Hormone
BnERF-29	ABRE	ACGTG	570	5	+	Arabidopsis thaliana	cis-acting element involved in the abscisic acid responsiveness	ABA responsiveness	Hormone
BnERF-3	ABRE	ACGTG	1201	5	+	Arabidopsis thaliana	cis-acting element involved in the abscisic acid responsiveness	ABA responsiveness	Hormone
BnERF-3	ABRE	ACGTG	1682	5	+	Arabidopsis thaliana	cis-acting element involved in the abscisic acid responsiveness	ABA responsiveness	Hormone
BnERF-31	ABRE	ACGTG	1506	5	-	Arabidopsis thaliana	cis-acting element involved in the abscisic acid responsiveness	ABA responsiveness	Hormone
BnERF-32	ABRE	ACGTG	415	5	-	Arabidopsis thaliana	cis-acting element involved in the abscisic acid responsiveness	ABA responsiveness	Hormone
BnERF-32	ABRE	CACGTG	738	6	+	Arabidopsis thaliana	cis-acting element involved in the abscisic acid responsiveness	ABA responsiveness	Hormone
BnERF-32	ABRE	ACGTG	739	5	+	Arabidopsis thaliana	cis-acting element involved in the abscisic acid responsiveness	ABA responsiveness	Hormone
BnERF-32	ABRE	GCCGCGTGGC	840	9	+	Oryza sativa	cis-acting element involved in the abscisic acid responsiveness	ABA responsiveness	Hormone
BnERF-32	ABRE	CACGTG	842	6	+	Arabidopsis thaliana	cis-acting element involved in the abscisic acid responsiveness	ABA responsiveness	Hormone
BnERF-32	ABRE	ACGTG	843	5	+	Arabidopsis thaliana	cis-acting element involved in the abscisic acid responsiveness	ABA responsiveness	Hormone
BnERF-32	ABRE	CGCACGTGTC	855	9	+	Hordeum vulgare	cis-acting element involved in the abscisic acid responsiveness	ABA responsiveness	Hormone
BnERF-32	ABRE	CACGTG	857	6	+	Arabidopsis thaliana	cis-acting element involved in the abscisic acid responsiveness	ABA responsiveness	Hormone
BnERF-32	ABRE	ACGTG	858	5	+	Arabidopsis thaliana	cis-acting element involved in the abscisic acid responsiveness	ABA responsiveness	Hormone
BnERF-32	ABRE	ACGTG	1750	5	+	Arabidopsis thaliana	cis-acting element involved in the abscisic acid responsiveness	ABA responsiveness	Hormone
BnERF-33	ABRE	ACGTG	712	5	-	Arabidopsis thaliana	cis-acting element involved in the abscisic acid responsiveness	ABA responsiveness	Hormone
BnERF-33	ABRE	ACGTG	1205	5	-	Arabidopsis thaliana	cis-acting element involved in the abscisic acid responsiveness	ABA responsiveness	Hormone
BnERF-34	ABRE	GCAACGTGTC	337	9	+	Hordeum vulgare	cis-acting element involved in the abscisic acid responsiveness	ABA responsiveness	Hormone
BnERF-34	ABRE	ACGTG	340	5	+	Arabidopsis thaliana	cis-acting element involved in the abscisic acid responsiveness	ABA responsiveness	Hormone
BnERF-34	ABRE	CACGTG	1287	6	-	Arabidopsis thaliana	cis-acting element involved in the abscisic acid responsiveness	ABA responsiveness	Hormone
BnERF-34	ABRE	ACGTG	1288	5	+	Arabidopsis thaliana	cis-acting element involved in the abscisic acid responsiveness	ABA responsiveness	Hormone
BnERF-35	ABRE	TACGGTC	1319	7	+	Arabidopsis thaliana	cis-acting element involved in the abscisic acid responsiveness	ABA responsiveness	Hormone
BnERF-36	ABRE	CACGTG	267	6	+	Arabidopsis thaliana	cis-acting element involved in the abscisic acid responsiveness	ABA responsiveness	Hormone
BnERF-36	ABRE	ACGTG	268	5	+	Arabidopsis thaliana	cis-acting element involved in the abscisic acid responsiveness	ABA responsiveness	Hormone
BnERF-36	ABRE	CACGTG	860	6	+	Arabidopsis thaliana	cis-acting element involved in the abscisic acid responsiveness	ABA responsiveness	Hormone
BnERF-36	ABRE	ACGTG	861	5	+	Arabidopsis thaliana	cis-acting element involved in the abscisic acid responsiveness	ABA responsiveness	Hormone
BnERF-36	ABRE	ACGTG	904	5	+	Arabidopsis thaliana	cis-acting element involved in the abscisic acid responsiveness	ABA responsiveness	Hormone
BnERF-36	ABRE	CACGTG	1279	6	-	Arabidopsis thaliana	cis-acting element involved in the abscisic acid responsiveness	ABA responsiveness	Hormone
BnERF-36	ABRE	ACGTG	1280	5	+	Arabidopsis thaliana	cis-acting element involved in the abscisic acid responsiveness	ABA responsiveness	Hormone
BnERF-36	ABRE	CACGTG	1562	6	-	Arabidopsis thaliana	cis-acting element involved in the abscisic acid responsiveness	ABA responsiveness	Hormone
BnERF-36	ABRE	ACGTG	1563	5	+	Arabidopsis thaliana	cis-acting element involved in the abscisic acid responsiveness	ABA responsiveness	Hormone
BnERF-37	ABRE	ACGTG	109	5	-	Arabidopsis thaliana	cis-acting element involved in the abscisic acid responsiveness	ABA responsiveness	Hormone
BnERF-37	ABRE	GCCGCGTGGC	1531	9	+	Oryza sativa	cis-acting element involved in the abscisic acid responsiveness	ABA responsiveness	Hormone
BnERF-37	ABRE	ACGTG	1540	5	-	Arabidopsis thaliana	cis-acting element involved in the abscisic acid responsiveness	ABA responsiveness	Hormone
BnERF-38	ABRE	ACGTG	102	5	-	Arabidopsis thaliana	cis-acting element involved in the abscisic acid responsiveness	ABA responsiveness	Hormone
BnERF-38	ABRE	GACACGTGGC	487	9	+	Triticum aestivum	cis-acting element involved in the abscisic acid responsiveness	ABA responsiveness	Hormone
BnERF-38	ABRE	CACGTG	489	6	+	Arabidopsis thaliana	cis-acting element involved in the abscisic acid responsiveness	ABA responsiveness	Hormone
BnERF-38	ABRE	ACGTG	490	5	+	Arabidopsis thaliana	cis-acting element involved in the abscisic acid responsiveness	ABA responsiveness	Hormone
BnERF-38	ABRE	ACGTG	1605	5	-	Arabidopsis thaliana	cis-acting element involved in the abscisic acid responsiveness	ABA responsiveness	Hormone
BnERF-4	ABRE	ACGTG	629	5	+	Arabidopsis thaliana	cis-acting element involved in the abscisic acid responsiveness	ABA responsiveness	Hormone
BnERF-4	ABRE	ACGTG	639	5	-	Arabidopsis thaliana	cis-acting element involved in the abscisic acid responsiveness	ABA responsiveness	Hormone
BnERF-4	ABRE	ACGTG	1730	5	+	Arabidopsis thaliana	cis-acting element involved in the abscisic acid responsiveness	ABA responsiveness	Hormone
BnERF-40	ABRE	CACGTG	446	6	+	Arabidopsis thaliana	cis-acting element involved in the abscisic acid responsiveness	ABA responsiveness	Hormone
BnERF-40	ABRE	ACGTG	447	5	+	Arabidopsis thaliana	cis-acting element involved in the abscisic acid responsiveness	ABA responsiveness	Hormone
BnERF-40	ABRE	AACCCGG	1732	7	-	Arabidopsis thaliana	cis-acting element involved in the abscisic acid responsiveness	ABA responsiveness	Hormone
BnERF-41	ABRE	TACGGTC	54	7	+	Arabidopsis thaliana	cis-acting element involved in the abscisic acid responsiveness	ABA responsiveness	Hormone
BnERF-41	ABRE	ACGTG	1677	5	-	Arabidopsis thaliana	cis-acting element involved in the abscisic acid responsiveness	ABA responsiveness	Hormone
BnERF-5	ABRE	ACGTG	1615	5	-	Arabidopsis thaliana	cis-acting element involved in the abscisic acid responsiveness	ABA responsiveness	Hormone
BnERF-6	ABRE	ACGTG	910	5	-	Arabidopsis thaliana	cis-acting element involved in the abscisic acid responsiveness	ABA responsiveness	Hormone
BnERF-6	ABRE	ACGTG	1569	5	+	Arabidopsis thaliana	cis-acting element involved in the abscisic acid responsiveness	ABA responsiveness	Hormone
BnERF-6	ABRE	CACGTG	1630	6	-	Arabidopsis thaliana	cis-acting element involved in the abscisic acid responsiveness	ABA responsiveness	Hormone
BnERF-6	ABRE	ACGTG	1631	5	+	Arabidopsis thaliana	cis-acting element involved in the abscisic acid responsiveness	ABA responsiveness	Hormone
BnERF-7	ABRE	ACGTG	1009	5	+	Arabidopsis thaliana	cis-acting element involved in the abscisic acid responsiveness	ABA responsiveness	Hormone
BnERF-7	ABRE	ACGTG	1299	5	+	Arabidopsis thaliana	cis-acting element involved in the abscisic acid responsiveness	ABA responsiveness	Hormone
BnERF-7	ABRE	ACGTG	1591	5	+	Arabidopsis thaliana	cis-acting element involved in the abscisic acid responsiveness	ABA responsiveness	Hormone
BnERF-8	ABRE	ACGTG	364	5	+	Arabidopsis thaliana	cis-acting element involved in the abscisic acid responsiveness	ABA responsiveness	Hormone
BnERF-8	ABRE	GACACGTGGC	1276	9	-	Triticum aestivum	cis-acting element involved in the abscisic acid responsiveness	ABA responsiveness	Hormone
BnERF-8	ABRE	CACGTG	1278	6	-	Arabidopsis thaliana	cis-acting element involved in the abscisic acid responsiveness	ABA responsiveness	Hormone
BnERF-8	ABRE	ACGTG	1279	5	+	Arabidopsis thaliana	cis-acting element involved in the abscisic acid responsiveness	ABA responsiveness	Hormone
BnERF-8	ABRE	GACACGTGGC	1313	9	-	Triticum aestivum	cis-acting element involved in the abscisic acid responsiveness	ABA responsiveness	Hormone
BnERF-8	ABRE	CACGTG	1315	6	-	Arabidopsis thaliana	cis-acting element involved in the abscisic acid responsiveness	ABA responsiveness	Hormone
BnERF-8	ABRE	ACGTG	1316	5	+	Arabidopsis thaliana	cis-acting element involved in the abscisic acid responsiveness	ABA responsiveness	Hormone
BnERF-8	ABRE	ACGTG	1764	5	-	Arabidopsis thaliana	cis-acting element involved in the abscisic acid responsiveness	ABA responsiveness	Hormone
BnERF-9	ABRE	ACGTG	44	5	-	Arabidopsis thaliana	cis-acting element involved in the abscisic acid responsiveness	ABA responsiveness	Hormone
BnERF-9	ABRE	ACGTG	1833	5	-	Arabidopsis thaliana	cis-acting element involved in the abscisic acid responsiveness	ABA responsiveness	Hormone
BnRAV-2	ABRE	ACGTG	308	5	-	Arabidopsis thaliana	cis-acting element involved in the abscisic acid responsiveness	ABA responsiveness	Hormone
BnRAV-2	ABRE	ACGTG	1136	5	+	Arabidopsis thaliana	cis-acting element involved in the abscisic acid responsiveness	ABA responsiveness	Hormone
BnRAV-3	ABRE	ACGTG	1514	5	+	Arabidopsis thaliana	cis-acting element involved in the abscisic acid responsiveness	ABA responsiveness	Hormone
BnERF-21	ABRE	ACGTG	1465	5	-	Arabidopsis thaliana	cis-acting element involved in the abscisic acid responsiveness	ABA responsiveness	Hormone
BnERF-42	ABRE	ACGTG	1555	5	+	Arabidopsis thaliana	cis-acting element involved in the abscisic acid responsiveness	ABA responsiveness	Hormone
BnAP2-1	ARE	AAACCA	645	6	+	Zea mays	cis-acting regulatory element essential for the anaerobic induction	anaerobic induction	Stress
BnAP2-1	ARE	AAACCA	1219	6	+	Zea mays	cis-acting regulatory element essential for the anaerobic induction	anaerobic induction	Stress
BnAP2-1	ARE	AAACCA	1839	6	-	Zea mays	cis-acting regulatory element essential for the anaerobic induction	anaerobic induction	Stress
BnAP2-10	ARE	AAACCA	112	6	+	Zea mays	cis-acting regulatory element essential for the anaerobic induction	anaerobic induction	Stress
BnAP2-10	ARE	AAACCA	146	6	+	Zea mays	cis-acting regulatory element essential for the anaerobic induction	anaerobic induction	Stress
BnAP2-10	ARE	AAACCA	1692	6	+	Zea mays	cis-acting regulatory element essential for the anaerobic induction	anaerobic induction	Stress
BnAP2-11	ARE	AAACCA	1563	6	+	Zea mays	cis-acting regulatory element essential for the anaerobic induction	anaerobic induction	Stress
BnAP2-12	ARE	AAACCA	604	6	+	Zea mays	cis-acting regulatory element essential for the anaerobic induction	anaerobic induction	Stress
BnAP2-12	ARE	AAACCA	1226	6	+	Zea mays	cis-acting regulatory element essential for the anaerobic induction	anaerobic induction	Stress
BnAP2-13	ARE	AAACCA	134	6	-	Zea mays	cis-acting regulatory element essential for the anaerobic induction	anaerobic induction	Stress
BnAP2-13	ARE	AAACCA	169	6	-	Zea mays	cis-acting regulatory element essential for the anaerobic induction	anaerobic induction	Stress
BnAP2-13	ARE	AAACCA	280	6	-	Zea mays	cis-acting regulatory element essential for the anaerobic induction	anaerobic induction	Stress
BnAP2-13	ARE	AAACCA	1648	6	-	Zea mays	cis-acting regulatory element essential for the anaerobic induction	anaerobic induction	Stress
BnAP2-13	ARE	AAACCA	1804	6	+	Zea mays	cis-acting regulatory element essential for the anaerobic induction	anaerobic induction	Stress
BnAP2-16	ARE	AAACCA	265	6	-	Zea mays	cis-acting regulatory element essential for the anaerobic induction	anaerobic induction	Stress
BnAP2-16	ARE	AAACCA	968	6	-	Zea mays	cis-acting regulatory element essential for the anaerobic induction	anaerobic induction	Stress
BnAP2-16	ARE	AAACCA	1248	6	+	Zea mays	cis-acting regulatory element essential for the anaerobic induction	anaerobic induction	Stress
BnAP2-16	ARE	AAACCA	1771	6	+	Zea mays	cis-acting regulatory element essential for the anaerobic induction	anaerobic induction	Stress
BnAP2-17	ARE	AAACCA	402	6	-	Zea mays	cis-acting regulatory element essential for the anaerobic induction	anaerobic induction	Stress
BnAP2-17	ARE	AAACCA	525	6	-	Zea mays	cis-acting regulatory element essential for the anaerobic induction	anaerobic induction	Stress
BnAP2-17	ARE	AAACCA	616	6	-	Zea mays	cis-acting regulatory element essential for the anaerobic induction	anaerobic induction	Stress
BnAP2-17	ARE	AAACCA	1450	6	-	Zea mays	cis-acting regulatory element essential for the anaerobic induction	anaerobic induction	Stress
BnAP2-18	ARE	AAACCA	1618	6	-	Zea mays	cis-acting regulatory element essential for the anaerobic induction	anaerobic induction	Stress
BnAP2-3	ARE	AAACCA	3	6	+	Zea mays	cis-acting regulatory element essential for the anaerobic induction	anaerobic induction	Stress
BnAP2-3	ARE	AAACCA	1562	6	+	Zea mays	cis-acting regulatory element essential for the anaerobic induction	anaerobic induction	Stress
BnAP2-3	ARE	AAACCA	1746	6	+	Zea mays	cis-acting regulatory element essential for the anaerobic induction	anaerobic induction	Stress
BnAP2-3	ARE	AAACCA	1925	6	+	Zea mays	cis-acting regulatory element essential for the anaerobic induction	anaerobic induction	Stress
BnAP2-4	ARE	AAACCA	1834	6	+	Zea mays	cis-acting regulatory element essential for the anaerobic induction	anaerobic induction	Stress
BnAP2-4	ARE	AAACCA	1901	6	-	Zea mays	cis-acting regulatory element essential for the anaerobic induction	anaerobic induction	Stress
BnAP2-5	ARE	AAACCA	726	6	+	Zea mays	cis-acting regulatory element essential for the anaerobic induction	anaerobic induction	Stress
BnAP2-5	ARE	AAACCA	798	6	+	Zea mays	cis-acting regulatory element essential for the anaerobic induction	anaerobic induction	Stress
BnAP2-5	ARE	AAACCA	1875	6	-	Zea mays	cis-acting regulatory element essential for the anaerobic induction	anaerobic induction	Stress
BnAP2-5	ARE	AAACCA	1954	6	+	Zea mays	cis-acting regulatory element essential for the anaerobic induction	anaerobic induction	Stress
BnAP2-6	ARE	AAACCA	726	6	+	Zea mays	cis-acting regulatory element essential for the anaerobic induction	anaerobic induction	Stress
BnAP2-6	ARE	AAACCA	798	6	+	Zea mays	cis-acting regulatory element essential for the anaerobic induction	anaerobic induction	Stress
BnAP2-6	ARE	AAACCA	1875	6	-	Zea mays	cis-acting regulatory element essential for the anaerobic induction	anaerobic induction	Stress
BnAP2-6	ARE	AAACCA	1954	6	+	Zea mays	cis-acting regulatory element essential for the anaerobic induction	anaerobic induction	Stress
BnAP2-7	ARE	AAACCA	1503	6	+	Zea mays	cis-acting regulatory element essential for the anaerobic induction	anaerobic induction	Stress
BnAP2-7	ARE	AAACCA	1711	6	+	Zea mays	cis-acting regulatory element essential for the anaerobic induction	anaerobic induction	Stress
BnAP2-9	ARE	AAACCA	772	6	+	Zea mays	cis-acting regulatory element essential for the anaerobic induction	anaerobic induction	Stress
BnAP2-9	ARE	AAACCA	1702	6	+	Zea mays	cis-acting regulatory element essential for the anaerobic induction	anaerobic induction	Stress
BnDREB-1	ARE	AAACCA	1869	6	+	Zea mays	cis-acting regulatory element essential for the anaerobic induction	anaerobic induction	Stress
BnDREB-1	ARE	AAACCA	1898	6	+	Zea mays	cis-acting regulatory element essential for the anaerobic induction	anaerobic induction	Stress
BnDREB-10	ARE	AAACCA	819	6	+	Zea mays	cis-acting regulatory element essential for the anaerobic induction	anaerobic induction	Stress
BnDREB-10	ARE	AAACCA	1111	6	+	Zea mays	cis-acting regulatory element essential for the anaerobic induction	anaerobic induction	Stress
BnDREB-10	ARE	AAACCA	1402	6	-	Zea mays	cis-acting regulatory element essential for the anaerobic induction	anaerobic induction	Stress
BnDREB-11	ARE	AAACCA	744	6	+	Zea mays	cis-acting regulatory element essential for the anaerobic induction	anaerobic induction	Stress
BnDREB-11	ARE	AAACCA	1164	6	+	Zea mays	cis-acting regulatory element essential for the anaerobic induction	anaerobic induction	Stress
BnDREB-13	ARE	AAACCA	1372	6	+	Zea mays	cis-acting regulatory element essential for the anaerobic induction	anaerobic induction	Stress
BnDREB-13	ARE	AAACCA	1868	6	+	Zea mays	cis-acting regulatory element essential for the anaerobic induction	anaerobic induction	Stress
BnDREB-13	ARE	AAACCA	1874	6	+	Zea mays	cis-acting regulatory element essential for the anaerobic induction	anaerobic induction	Stress
BnDREB-13	ARE	AAACCA	1880	6	+	Zea mays	cis-acting regulatory element essential for the anaerobic induction	anaerobic induction	Stress
BnDREB-13	ARE	AAACCA	1886	6	+	Zea mays	cis-acting regulatory element essential for the anaerobic induction	anaerobic induction	Stress
BnDREB-14	ARE	AAACCA	107	6	-	Zea mays	cis-acting regulatory element essential for the anaerobic induction	anaerobic induction	Stress
BnDREB-14	ARE	AAACCA	1928	6	+	Zea mays	cis-acting regulatory element essential for the anaerobic induction	anaerobic induction	Stress
BnDREB-16	ARE	AAACCA	695	6	-	Zea mays	cis-acting regulatory element essential for the anaerobic induction	anaerobic induction	Stress
BnDREB-16	ARE	AAACCA	1196	6	-	Zea mays	cis-acting regulatory element essential for the anaerobic induction	anaerobic induction	Stress
BnDREB-16	ARE	AAACCA	1835	6	-	Zea mays	cis-acting regulatory element essential for the anaerobic induction	anaerobic induction	Stress
BnDREB-17	ARE	AAACCA	1210	6	+	Zea mays	cis-acting regulatory element essential for the anaerobic induction	anaerobic induction	Stress
BnDREB-17	ARE	AAACCA	1762	6	-	Zea mays	cis-acting regulatory element essential for the anaerobic induction	anaerobic induction	Stress
BnDREB-18	ARE	AAACCA	76	6	-	Zea mays	cis-acting regulatory element essential for the anaerobic induction	anaerobic induction	Stress
BnDREB-18	ARE	AAACCA	797	6	-	Zea mays	cis-acting regulatory element essential for the anaerobic induction	anaerobic induction	Stress
BnDREB-18	ARE	AAACCA	1109	6	+	Zea mays	cis-acting regulatory element essential for the anaerobic induction	anaerobic induction	Stress
BnDREB-18	ARE	AAACCA	1672	6	+	Zea mays	cis-acting regulatory element essential for the anaerobic induction	anaerobic induction	Stress
BnDREB-19	ARE	AAACCA	76	6	-	Zea mays	cis-acting regulatory element essential for the anaerobic induction	anaerobic induction	Stress
BnDREB-19	ARE	AAACCA	285	6	-	Zea mays	cis-acting regulatory element essential for the anaerobic induction	anaerobic induction	Stress
BnDREB-19	ARE	AAACCA	493	6	-	Zea mays	cis-acting regulatory element essential for the anaerobic induction	anaerobic induction	Stress
BnDREB-19	ARE	AAACCA	1068	6	+	Zea mays	cis-acting regulatory element essential for the anaerobic induction	anaerobic induction	Stress
BnDREB-19	ARE	AAACCA	1850	6	+	Zea mays	cis-acting regulatory element essential for the anaerobic induction	anaerobic induction	Stress
BnDREB-2	ARE	AAACCA	408	6	-	Zea mays	cis-acting regulatory element essential for the anaerobic induction	anaerobic induction	Stress
BnDREB-21	ARE	AAACCA	1283	6	+	Zea mays	cis-acting regulatory element essential for the anaerobic induction	anaerobic induction	Stress
BnDREB-21	ARE	AAACCA	1904	6	+	Zea mays	cis-acting regulatory element essential for the anaerobic induction	anaerobic induction	Stress
BnDREB-21	ARE	AAACCA	1953	6	-	Zea mays	cis-acting regulatory element essential for the anaerobic induction	anaerobic induction	Stress
BnDREB-3	ARE	AAACCA	857	6	+	Zea mays	cis-acting regulatory element essential for the anaerobic induction	anaerobic induction	Stress
BnDREB-4	ARE	AAACCA	835	6	+	Zea mays	cis-acting regulatory element essential for the anaerobic induction	anaerobic induction	Stress
BnDREB-4	ARE	AAACCA	1075	6	+	Zea mays	cis-acting regulatory element essential for the anaerobic induction	anaerobic induction	Stress
BnDREB-5	ARE	AAACCA	1014	6	+	Zea mays	cis-acting regulatory element essential for the anaerobic induction	anaerobic induction	Stress
BnDREB-7	ARE	AAACCA	486	6	+	Zea mays	cis-acting regulatory element essential for the anaerobic induction	anaerobic induction	Stress
BnDREB-7	ARE	AAACCA	679	6	+	Zea mays	cis-acting regulatory element essential for the anaerobic induction	anaerobic induction	Stress
BnDREB-7	ARE	AAACCA	1092	6	-	Zea mays	cis-acting regulatory element essential for the anaerobic induction	anaerobic induction	Stress
BnDREB-7	ARE	AAACCA	1992	6	+	Zea mays	cis-acting regulatory element essential for the anaerobic induction	anaerobic induction	Stress
BnDREB-9	ARE	AAACCA	841	6	-	Zea mays	cis-acting regulatory element essential for the anaerobic induction	anaerobic induction	Stress
BnDREB-9	ARE	AAACCA	1088	6	+	Zea mays	cis-acting regulatory element essential for the anaerobic induction	anaerobic induction	Stress
BnDREB-9	ARE	AAACCA	1184	6	-	Zea mays	cis-acting regulatory element essential for the anaerobic induction	anaerobic induction	Stress
BnERF-1	ARE	AAACCA	1543	6	+	Zea mays	cis-acting regulatory element essential for the anaerobic induction	anaerobic induction	Stress
BnERF-10	ARE	AAACCA	1710	6	+	Zea mays	cis-acting regulatory element essential for the anaerobic induction	anaerobic induction	Stress
BnERF-10	ARE	AAACCA	1969	6	+	Zea mays	cis-acting regulatory element essential for the anaerobic induction	anaerobic induction	Stress
BnERF-11	ARE	AAACCA	1447	6	+	Zea mays	cis-acting regulatory element essential for the anaerobic induction	anaerobic induction	Stress
BnERF-11	ARE	AAACCA	1746	6	+	Zea mays	cis-acting regulatory element essential for the anaerobic induction	anaerobic induction	Stress
BnERF-11	ARE	AAACCA	1790	6	+	Zea mays	cis-acting regulatory element essential for the anaerobic induction	anaerobic induction	Stress
BnERF-12	ARE	AAACCA	433	6	+	Zea mays	cis-acting regulatory element essential for the anaerobic induction	anaerobic induction	Stress
BnERF-12	ARE	AAACCA	799	6	-	Zea mays	cis-acting regulatory element essential for the anaerobic induction	anaerobic induction	Stress
BnERF-12	ARE	AAACCA	1733	6	+	Zea mays	cis-acting regulatory element essential for the anaerobic induction	anaerobic induction	Stress
BnERF-13	ARE	AAACCA	545	6	-	Zea mays	cis-acting regulatory element essential for the anaerobic induction	anaerobic induction	Stress
BnERF-14	ARE	AAACCA	252	6	+	Zea mays	cis-acting regulatory element essential for the anaerobic induction	anaerobic induction	Stress
BnERF-14	ARE	AAACCA	553	6	+	Zea mays	cis-acting regulatory element essential for the anaerobic induction	anaerobic induction	Stress
BnERF-14	ARE	AAACCA	989	6	-	Zea mays	cis-acting regulatory element essential for the anaerobic induction	anaerobic induction	Stress
BnERF-14	ARE	AAACCA	1021	6	-	Zea mays	cis-acting regulatory element essential for the anaerobic induction	anaerobic induction	Stress
BnERF-17	ARE	AAACCA	1083	6	-	Zea mays	cis-acting regulatory element essential for the anaerobic induction	anaerobic induction	Stress
BnERF-18	ARE	AAACCA	71	6	-	Zea mays	cis-acting regulatory element essential for the anaerobic induction	anaerobic induction	Stress
BnERF-18	ARE	AAACCA	1457	6	+	Zea mays	cis-acting regulatory element essential for the anaerobic induction	anaerobic induction	Stress
BnERF-19	ARE	AAACCA	1096	6	+	Zea mays	cis-acting regulatory element essential for the anaerobic induction	anaerobic induction	Stress
BnERF-2	ARE	AAACCA	380	6	-	Zea mays	cis-acting regulatory element essential for the anaerobic induction	anaerobic induction	Stress
BnERF-2	ARE	AAACCA	616	6	+	Zea mays	cis-acting regulatory element essential for the anaerobic induction	anaerobic induction	Stress
BnERF-2	ARE	AAACCA	1139	6	+	Zea mays	cis-acting regulatory element essential for the anaerobic induction	anaerobic induction	Stress
BnERF-2	ARE	AAACCA	1250	6	+	Zea mays	cis-acting regulatory element essential for the anaerobic induction	anaerobic induction	Stress
BnERF-2	ARE	AAACCA	1262	6	+	Zea mays	cis-acting regulatory element essential for the anaerobic induction	anaerobic induction	Stress
BnERF-2	ARE	AAACCA	1317	6	-	Zea mays	cis-acting regulatory element essential for the anaerobic induction	anaerobic induction	Stress
BnERF-2	ARE	AAACCA	1893	6	+	Zea mays	cis-acting regulatory element essential for the anaerobic induction	anaerobic induction	Stress
BnERF-2	ARE	AAACCA	1958	6	+	Zea mays	cis-acting regulatory element essential for the anaerobic induction	anaerobic induction	Stress
BnERF-22	ARE	AAACCA	1210	6	+	Zea mays	cis-acting regulatory element essential for the anaerobic induction	anaerobic induction	Stress
BnERF-24	ARE	AAACCA	333	6	+	Zea mays	cis-acting regulatory element essential for the anaerobic induction	anaerobic induction	Stress
BnERF-25	ARE	AAACCA	1201	6	+	Zea mays	cis-acting regulatory element essential for the anaerobic induction	anaerobic induction	Stress
BnERF-25	ARE	AAACCA	1618	6	+	Zea mays	cis-acting regulatory element essential for the anaerobic induction	anaerobic induction	Stress
BnERF-25	ARE	AAACCA	1736	6	+	Zea mays	cis-acting regulatory element essential for the anaerobic induction	anaerobic induction	Stress
BnERF-26	ARE	AAACCA	1871	6	+	Zea mays	cis-acting regulatory element essential for the anaerobic induction	anaerobic induction	Stress
BnERF-27	ARE	AAACCA	226	6	+	Zea mays	cis-acting regulatory element essential for the anaerobic induction	anaerobic induction	Stress
BnERF-27	ARE	AAACCA	1510	6	-	Zea mays	cis-acting regulatory element essential for the anaerobic induction	anaerobic induction	Stress
BnERF-27	ARE	AAACCA	1867	6	+	Zea mays	cis-acting regulatory element essential for the anaerobic induction	anaerobic induction	Stress
BnERF-27	ARE	AAACCA	1937	6	+	Zea mays	cis-acting regulatory element essential for the anaerobic induction	anaerobic induction	Stress
BnERF-3	ARE	AAACCA	63	6	-	Zea mays	cis-acting regulatory element essential for the anaerobic induction	anaerobic induction	Stress
BnERF-3	ARE	AAACCA	415	6	+	Zea mays	cis-acting regulatory element essential for the anaerobic induction	anaerobic induction	Stress
BnERF-30	ARE	AAACCA	44	6	-	Zea mays	cis-acting regulatory element essential for the anaerobic induction	anaerobic induction	Stress
BnERF-30	ARE	AAACCA	356	6	-	Zea mays	cis-acting regulatory element essential for the anaerobic induction	anaerobic induction	Stress
BnERF-30	ARE	AAACCA	1292	6	-	Zea mays	cis-acting regulatory element essential for the anaerobic induction	anaerobic induction	Stress
BnERF-30	ARE	AAACCA	1957	6	+	Zea mays	cis-acting regulatory element essential for the anaerobic induction	anaerobic induction	Stress
BnERF-31	ARE	AAACCA	1227	6	-	Zea mays	cis-acting regulatory element essential for the anaerobic induction	anaerobic induction	Stress
BnERF-31	ARE	AAACCA	1472	6	+	Zea mays	cis-acting regulatory element essential for the anaerobic induction	anaerobic induction	Stress
BnERF-31	ARE	AAACCA	1740	6	+	Zea mays	cis-acting regulatory element essential for the anaerobic induction	anaerobic induction	Stress
BnERF-32	ARE	AAACCA	1033	6	+	Zea mays	cis-acting regulatory element essential for the anaerobic induction	anaerobic induction	Stress
BnERF-32	ARE	AAACCA	1911	6	+	Zea mays	cis-acting regulatory element essential for the anaerobic induction	anaerobic induction	Stress
BnERF-33	ARE	AAACCA	1157	6	-	Zea mays	cis-acting regulatory element essential for the anaerobic induction	anaerobic induction	Stress
BnERF-35	ARE	AAACCA	1215	6	+	Zea mays	cis-acting regulatory element essential for the anaerobic induction	anaerobic induction	Stress
BnERF-35	ARE	AAACCA	1959	6	+	Zea mays	cis-acting regulatory element essential for the anaerobic induction	anaerobic induction	Stress
BnERF-36	ARE	AAACCA	1610	6	+	Zea mays	cis-acting regulatory element essential for the anaerobic induction	anaerobic induction	Stress
BnERF-38	ARE	AAACCA	1054	6	+	Zea mays	cis-acting regulatory element essential for the anaerobic induction	anaerobic induction	Stress
BnERF-39	ARE	AAACCA	460	6	+	Zea mays	cis-acting regulatory element essential for the anaerobic induction	anaerobic induction	Stress
BnERF-39	ARE	AAACCA	980	6	+	Zea mays	cis-acting regulatory element essential for the anaerobic induction	anaerobic induction	Stress
BnERF-39	ARE	AAACCA	1169	6	+	Zea mays	cis-acting regulatory element essential for the anaerobic induction	anaerobic induction	Stress
BnERF-39	ARE	AAACCA	1883	6	+	Zea mays	cis-acting regulatory element essential for the anaerobic induction	anaerobic induction	Stress
BnERF-39	ARE	AAACCA	1965	6	-	Zea mays	cis-acting regulatory element essential for the anaerobic induction	anaerobic induction	Stress
BnERF-4	ARE	AAACCA	1314	6	-	Zea mays	cis-acting regulatory element essential for the anaerobic induction	anaerobic induction	Stress
BnERF-4	ARE	AAACCA	1839	6	+	Zea mays	cis-acting regulatory element essential for the anaerobic induction	anaerobic induction	Stress
BnERF-40	ARE	AAACCA	524	6	+	Zea mays	cis-acting regulatory element essential for the anaerobic induction	anaerobic induction	Stress
BnERF-40	ARE	AAACCA	1039	6	+	Zea mays	cis-acting regulatory element essential for the anaerobic induction	anaerobic induction	Stress
BnERF-40	ARE	AAACCA	1069	6	+	Zea mays	cis-acting regulatory element essential for the anaerobic induction	anaerobic induction	Stress
BnERF-40	ARE	AAACCA	1094	6	+	Zea mays	cis-acting regulatory element essential for the anaerobic induction	anaerobic induction	Stress
BnERF-40	ARE	AAACCA	1237	6	+	Zea mays	cis-acting regulatory element essential for the anaerobic induction	anaerobic induction	Stress
BnERF-41	ARE	AAACCA	1465	6	-	Zea mays	cis-acting regulatory element essential for the anaerobic induction	anaerobic induction	Stress
BnERF-5	ARE	AAACCA	35	6	-	Zea mays	cis-acting regulatory element essential for the anaerobic induction	anaerobic induction	Stress
BnERF-5	ARE	AAACCA	135	6	-	Zea mays	cis-acting regulatory element essential for the anaerobic induction	anaerobic induction	Stress
BnERF-5	ARE	AAACCA	661	6	-	Zea mays	cis-acting regulatory element essential for the anaerobic induction	anaerobic induction	Stress
BnERF-5	ARE	AAACCA	1227	6	+	Zea mays	cis-acting regulatory element essential for the anaerobic induction	anaerobic induction	Stress
BnERF-5	ARE	AAACCA	1356	6	+	Zea mays	cis-acting regulatory element essential for the anaerobic induction	anaerobic induction	Stress
BnERF-5	ARE	AAACCA	1503	6	+	Zea mays	cis-acting regulatory element essential for the anaerobic induction	anaerobic induction	Stress
BnERF-6	ARE	AAACCA	17	6	+	Zea mays	cis-acting regulatory element essential for the anaerobic induction	anaerobic induction	Stress
BnERF-7	ARE	AAACCA	1473	6	+	Zea mays	cis-acting regulatory element essential for the anaerobic induction	anaerobic induction	Stress
BnERF-8	ARE	AAACCA	1411	6	-	Zea mays	cis-acting regulatory element essential for the anaerobic induction	anaerobic induction	Stress
BnERF-9	ARE	AAACCA	235	6	-	Zea mays	cis-acting regulatory element essential for the anaerobic induction	anaerobic induction	Stress
BnERF-9	ARE	AAACCA	1171	6	-	Zea mays	cis-acting regulatory element essential for the anaerobic induction	anaerobic induction	Stress
BnERF-9	ARE	AAACCA	1944	6	+	Zea mays	cis-acting regulatory element essential for the anaerobic induction	anaerobic induction	Stress
BnRAV-1	ARE	AAACCA	80	6	-	Zea mays	cis-acting regulatory element essential for the anaerobic induction	anaerobic induction	Stress
BnRAV-1	ARE	AAACCA	564	6	-	Zea mays	cis-acting regulatory element essential for the anaerobic induction	anaerobic induction	Stress
BnRAV-1	ARE	AAACCA	761	6	-	Zea mays	cis-acting regulatory element essential for the anaerobic induction	anaerobic induction	Stress
BnRAV-1	ARE	AAACCA	813	6	+	Zea mays	cis-acting regulatory element essential for the anaerobic induction	anaerobic induction	Stress
BnRAV-2	ARE	AAACCA	1056	6	+	Zea mays	cis-acting regulatory element essential for the anaerobic induction	anaerobic induction	Stress
BnRAV-2	ARE	AAACCA	1196	6	-	Zea mays	cis-acting regulatory element essential for the anaerobic induction	anaerobic induction	Stress
BnRAV-2	ARE	AAACCA	1595	6	-	Zea mays	cis-acting regulatory element essential for the anaerobic induction	anaerobic induction	Stress
BnRAV-3	ARE	AAACCA	1094	6	+	Zea mays	cis-acting regulatory element essential for the anaerobic induction	anaerobic induction	Stress
BnERF-21	ARE	AAACCA	385	6	-	Zea mays	cis-acting regulatory element essential for the anaerobic induction	anaerobic induction	Stress
BnERF-21	ARE	AAACCA	1238	6	-	Zea mays	cis-acting regulatory element essential for the anaerobic induction	anaerobic induction	Stress
BnERF-21	ARE	AAACCA	1259	6	-	Zea mays	cis-acting regulatory element essential for the anaerobic induction	anaerobic induction	Stress
BnERF-21	ARE	AAACCA	1329	6	-	Zea mays	cis-acting regulatory element essential for the anaerobic induction	anaerobic induction	Stress
BnERF-21	ARE	AAACCA	1448	6	+	Zea mays	cis-acting regulatory element essential for the anaerobic induction	anaerobic induction	Stress
BnERF-42	ARE	AAACCA	1299	6	+	Zea mays	cis-acting regulatory element essential for the anaerobic induction	anaerobic induction	Stress
BnERF-42	ARE	AAACCA	1733	6	+	Zea mays	cis-acting regulatory element essential for the anaerobic induction	anaerobic induction	Stress
BnAP2-12	GC-motif	CCCCCG	77	6	+	Zea mays	enhancer-like element involved in anoxic specific inducibility	anoxic specific inducibility	Stress
BnAP2-12	GC-motif	CCCCCG	97	6	+	Zea mays	enhancer-like element involved in anoxic specific inducibility	anoxic specific inducibility	Stress
BnAP2-12	GC-motif	CCCCCG	104	6	+	Zea mays	enhancer-like element involved in anoxic specific inducibility	anoxic specific inducibility	Stress
BnAP2-12	GC-motif	CCCCCG	123	6	+	Zea mays	enhancer-like element involved in anoxic specific inducibility	anoxic specific inducibility	Stress
BnAP2-12	GC-motif	CCCCCG	130	6	+	Zea mays	enhancer-like element involved in anoxic specific inducibility	anoxic specific inducibility	Stress
BnAP2-12	GC-motif	CCCCCG	138	6	+	Zea mays	enhancer-like element involved in anoxic specific inducibility	anoxic specific inducibility	Stress
BnAP2-13	GC-motif	CCCCCG	348	6	-	Zea mays	enhancer-like element involved in anoxic specific inducibility	anoxic specific inducibility	Stress
BnAP2-13	GC-motif	CCCCCG	599	6	+	Zea mays	enhancer-like element involved in anoxic specific inducibility	anoxic specific inducibility	Stress
BnDREB-17	GC-motif	CCCCCG	676	6	+	Zea mays	enhancer-like element involved in anoxic specific inducibility	anoxic specific inducibility	Stress
BnDREB-4	GC-motif	CCCCCG	487	6	+	Zea mays	enhancer-like element involved in anoxic specific inducibility	anoxic specific inducibility	Stress
BnERF-18	GC-motif	CCCCCG	108	6	+	Zea mays	enhancer-like element involved in anoxic specific inducibility	anoxic specific inducibility	Stress
BnERF-23	GC-motif	CCCCCG	1880	6	-	Zea mays	enhancer-like element involved in anoxic specific inducibility	anoxic specific inducibility	Stress
BnERF-38	GC-motif	CCCCCG	1738	6	+	Zea mays	enhancer-like element involved in anoxic specific inducibility	anoxic specific inducibility	Stress
BnERF-38	GC-motif	CCCCCG	1841	6	+	Zea mays	enhancer-like element involved in anoxic specific inducibility	anoxic specific inducibility	Stress
BnERF-4	GC-motif	CCCCCG	207	6	+	Zea mays	enhancer-like element involved in anoxic specific inducibility	anoxic specific inducibility	Stress
BnAP2-16	AuxRR-core	GGTCCAT	533	7	-	Nicotiana tabacum	cis-acting regulatory element involved in auxin responsiveness	Auxin-responsiveness	Hormone
BnAP2-3	AuxRR-core	GGTCCAT	224	7	-	Nicotiana tabacum	cis-acting regulatory element involved in auxin responsiveness	Auxin-responsiveness	Hormone
BnDREB-14	AuxRR-core	GGTCCAT	619	7	-	Nicotiana tabacum	cis-acting regulatory element involved in auxin responsiveness	Auxin-responsiveness	Hormone
BnERF-27	AuxRR-core	GGTCCAT	1080	7	-	Nicotiana tabacum	cis-acting regulatory element involved in auxin responsiveness	Auxin-responsiveness	Hormone
BnERF-28	AuxRR-core	GGTCCAT	61	7	+	Nicotiana tabacum	cis-acting regulatory element involved in auxin responsiveness	Auxin-responsiveness	Hormone
BnERF-3	AuxRR-core	GGTCCAT	1162	7	+	Nicotiana tabacum	cis-acting regulatory element involved in auxin responsiveness	Auxin-responsiveness	Hormone
BnERF-33	AuxRR-core	GGTCCAT	372	7	+	Nicotiana tabacum	cis-acting regulatory element involved in auxin responsiveness	Auxin-responsiveness	Hormone
BnERF-8	AuxRR-core	GGTCCAT	133	7	+	Nicotiana tabacum	cis-acting regulatory element involved in auxin responsiveness	Auxin-responsiveness	Hormone
BnRAV-1	AuxRR-core	GGTCCAT	293	7	-	Nicotiana tabacum	cis-acting regulatory element involved in auxin responsiveness	Auxin-responsiveness	Hormone
BnAP2-10	TGA-box	TGACGTAA	314	8	+	Glycine max	part of an auxin-responsive element	Auxin-responsiveness	Hormone
BnAP2-12	TGA-box	TGACGTAA	1182	8	-	Glycine max	part of an auxin-responsive element	Auxin-responsiveness	Hormone
BnDREB-14	TGA-box	TGACGTAA	1235	8	-	Glycine max	part of an auxin-responsive element	Auxin-responsiveness	Hormone
BnDREB-21	TGA-box	TGACGTAA	1427	8	+	Glycine max	part of an auxin-responsive element	Auxin-responsiveness	Hormone
BnERF-12	TGA-box	TGACGTAA	1718	8	+	Glycine max	part of an auxin-responsive element	Auxin-responsiveness	Hormone
BnERF-2	TGA-box	TGACGTAA	1593	8	-	Glycine max	part of an auxin-responsive element	Auxin-responsiveness	Hormone
BnERF-32	TGA-box	TGACGTAA	123	8	-	Glycine max	part of an auxin-responsive element	Auxin-responsiveness	Hormone
BnERF-7	TGA-box	TGACGTAA	1499	8	+	Glycine max	part of an auxin-responsive element	Auxin-responsiveness	Hormone
BnAP2-1	TGA-element	AACGAC	1125	6	-	Brassica oleracea	auxin-responsive element	Auxin-responsiveness	Hormone
BnAP2-14	TGA-element	AACGAC	1723	6	-	Brassica oleracea	auxin-responsive element	Auxin-responsiveness	Hormone
BnAP2-17	TGA-element	AACGAC	230	6	+	Brassica oleracea	auxin-responsive element	Auxin-responsiveness	Hormone
BnAP2-17	TGA-element	AACGAC	277	6	+	Brassica oleracea	auxin-responsive element	Auxin-responsiveness	Hormone
BnAP2-5	TGA-element	AACGAC	685	6	-	Brassica oleracea	auxin-responsive element	Auxin-responsiveness	Hormone
BnAP2-5	TGA-element	AACGAC	1945	6	+	Brassica oleracea	auxin-responsive element	Auxin-responsiveness	Hormone
BnAP2-5	TGA-element	AACGAC	1989	6	+	Brassica oleracea	auxin-responsive element	Auxin-responsiveness	Hormone
BnAP2-6	TGA-element	AACGAC	685	6	-	Brassica oleracea	auxin-responsive element	Auxin-responsiveness	Hormone
BnAP2-6	TGA-element	AACGAC	1945	6	+	Brassica oleracea	auxin-responsive element	Auxin-responsiveness	Hormone
BnAP2-6	TGA-element	AACGAC	1989	6	+	Brassica oleracea	auxin-responsive element	Auxin-responsiveness	Hormone
BnAP2-7	TGA-element	AACGAC	867	6	+	Brassica oleracea	auxin-responsive element	Auxin-responsiveness	Hormone
BnAP2-7	TGA-element	AACGAC	910	6	-	Brassica oleracea	auxin-responsive element	Auxin-responsiveness	Hormone
BnAP2-7	TGA-element	AACGAC	976	6	-	Brassica oleracea	auxin-responsive element	Auxin-responsiveness	Hormone
BnAP2-7	TGA-element	AACGAC	1052	6	-	Brassica oleracea	auxin-responsive element	Auxin-responsiveness	Hormone
BnAP2-7	TGA-element	AACGAC	1105	6	-	Brassica oleracea	auxin-responsive element	Auxin-responsiveness	Hormone
BnAP2-8	TGA-element	AACGAC	1221	6	-	Brassica oleracea	auxin-responsive element	Auxin-responsiveness	Hormone
BnAP2-8	TGA-element	AACGAC	1730	6	-	Brassica oleracea	auxin-responsive element	Auxin-responsiveness	Hormone
BnDREB-1	TGA-element	AACGAC	742	6	+	Brassica oleracea	auxin-responsive element	Auxin-responsiveness	Hormone
BnDREB-11	TGA-element	AACGAC	728	6	+	Brassica oleracea	auxin-responsive element	Auxin-responsiveness	Hormone
BnDREB-13	TGA-element	AACGAC	1552	6	-	Brassica oleracea	auxin-responsive element	Auxin-responsiveness	Hormone
BnDREB-14	TGA-element	AACGAC	1301	6	+	Brassica oleracea	auxin-responsive element	Auxin-responsiveness	Hormone
BnDREB-14	TGA-element	AACGAC	1802	6	-	Brassica oleracea	auxin-responsive element	Auxin-responsiveness	Hormone
BnDREB-15	TGA-element	AACGAC	979	6	-	Brassica oleracea	auxin-responsive element	Auxin-responsiveness	Hormone
BnDREB-17	TGA-element	AACGAC	579	6	-	Brassica oleracea	auxin-responsive element	Auxin-responsiveness	Hormone
BnDREB-18	TGA-element	AACGAC	1312	6	+	Brassica oleracea	auxin-responsive element	Auxin-responsiveness	Hormone
BnDREB-18	TGA-element	AACGAC	1620	6	-	Brassica oleracea	auxin-responsive element	Auxin-responsiveness	Hormone
BnDREB-2	TGA-element	AACGAC	940	6	+	Brassica oleracea	auxin-responsive element	Auxin-responsiveness	Hormone
BnDREB-2	TGA-element	AACGAC	1242	6	-	Brassica oleracea	auxin-responsive element	Auxin-responsiveness	Hormone
BnDREB-3	TGA-element	AACGAC	863	6	-	Brassica oleracea	auxin-responsive element	Auxin-responsiveness	Hormone
BnDREB-3	TGA-element	AACGAC	1961	6	+	Brassica oleracea	auxin-responsive element	Auxin-responsiveness	Hormone
BnDREB-4	TGA-element	AACGAC	1630	6	-	Brassica oleracea	auxin-responsive element	Auxin-responsiveness	Hormone
BnDREB-6	TGA-element	AACGAC	219	6	-	Brassica oleracea	auxin-responsive element	Auxin-responsiveness	Hormone
BnDREB-9	TGA-element	AACGAC	826	6	+	Brassica oleracea	auxin-responsive element	Auxin-responsiveness	Hormone
BnERF-1	TGA-element	AACGAC	1708	6	+	Brassica oleracea	auxin-responsive element	Auxin-responsiveness	Hormone
BnERF-10	TGA-element	AACGAC	1626	6	+	Brassica oleracea	auxin-responsive element	Auxin-responsiveness	Hormone
BnERF-11	TGA-element	AACGAC	962	6	-	Brassica oleracea	auxin-responsive element	Auxin-responsiveness	Hormone
BnERF-12	TGA-element	AACGAC	595	6	+	Brassica oleracea	auxin-responsive element	Auxin-responsiveness	Hormone
BnERF-15	TGA-element	AACGAC	760	6	-	Brassica oleracea	auxin-responsive element	Auxin-responsiveness	Hormone
BnERF-18	TGA-element	AACGAC	227	6	+	Brassica oleracea	auxin-responsive element	Auxin-responsiveness	Hormone
BnERF-23	TGA-element	AACGAC	1550	6	+	Brassica oleracea	auxin-responsive element	Auxin-responsiveness	Hormone
BnERF-24	TGA-element	AACGAC	1442	6	-	Brassica oleracea	auxin-responsive element	Auxin-responsiveness	Hormone
BnERF-27	TGA-element	AACGAC	11	6	-	Brassica oleracea	auxin-responsive element	Auxin-responsiveness	Hormone
BnERF-27	TGA-element	AACGAC	149	6	+	Brassica oleracea	auxin-responsive element	Auxin-responsiveness	Hormone
BnERF-27	TGA-element	AACGAC	1131	6	+	Brassica oleracea	auxin-responsive element	Auxin-responsiveness	Hormone
BnERF-3	TGA-element	AACGAC	12	6	-	Brassica oleracea	auxin-responsive element	Auxin-responsiveness	Hormone
BnERF-35	TGA-element	AACGAC	1194	6	-	Brassica oleracea	auxin-responsive element	Auxin-responsiveness	Hormone
BnERF-37	TGA-element	AACGAC	534	6	-	Brassica oleracea	auxin-responsive element	Auxin-responsiveness	Hormone
BnERF-4	TGA-element	AACGAC	642	6	-	Brassica oleracea	auxin-responsive element	Auxin-responsiveness	Hormone
BnERF-4	TGA-element	AACGAC	763	6	+	Brassica oleracea	auxin-responsive element	Auxin-responsiveness	Hormone
BnERF-4	TGA-element	AACGAC	944	6	+	Brassica oleracea	auxin-responsive element	Auxin-responsiveness	Hormone
BnERF-40	TGA-element	AACGAC	300	6	+	Brassica oleracea	auxin-responsive element	Auxin-responsiveness	Hormone
BnERF-41	TGA-element	AACGAC	423	6	-	Brassica oleracea	auxin-responsive element	Auxin-responsiveness	Hormone
BnERF-6	TGA-element	AACGAC	290	6	+	Brassica oleracea	auxin-responsive element	Auxin-responsiveness	Hormone
BnERF-6	TGA-element	AACGAC	1665	6	+	Brassica oleracea	auxin-responsive element	Auxin-responsiveness	Hormone
BnERF-9	TGA-element	AACGAC	339	6	+	Brassica oleracea	auxin-responsive element	Auxin-responsiveness	Hormone
BnERF-9	TGA-element	AACGAC	1363	6	-	Brassica oleracea	auxin-responsive element	Auxin-responsiveness	Hormone
BnAP2-3	circadian	CAAAGATATC	1524	9	-	Lycopersicon esculentum	cis-acting regulatory element involved in circadian control	circadian control	Growth and development
BnAP2-9	circadian	CAAAGATATC	1605	9	-	Lycopersicon esculentum	cis-acting regulatory element involved in circadian control	circadian control	Growth and development
BnDREB-16	circadian	CAAAGATATC	1424	9	+	Lycopersicon esculentum	cis-acting regulatory element involved in circadian control	circadian control	Growth and development
BnDREB-17	circadian	CAAAGATATC	901	9	+	Lycopersicon esculentum	cis-acting regulatory element involved in circadian control	circadian control	Growth and development
BnDREB-2	circadian	CAAAGATATC	1302	9	+	Lycopersicon esculentum	cis-acting regulatory element involved in circadian control	circadian control	Growth and development
BnDREB-7	circadian	CAAAGATATC	354	9	+	Lycopersicon esculentum	cis-acting regulatory element involved in circadian control	circadian control	Growth and development
BnERF-14	circadian	CAAAGATATC	1327	9	+	Lycopersicon esculentum	cis-acting regulatory element involved in circadian control	circadian control	Growth and development
BnERF-19	circadian	CAAAGATATC	569	9	-	Lycopersicon esculentum	cis-acting regulatory element involved in circadian control	circadian control	Growth and development
BnERF-2	circadian	CAAAGATATC	368	9	-	Lycopersicon esculentum	cis-acting regulatory element involved in circadian control	circadian control	Growth and development
BnERF-25	circadian	CAAAGATATC	202	9	-	Lycopersicon esculentum	cis-acting regulatory element involved in circadian control	circadian control	Growth and development
BnERF-25	circadian	CAAAGATATC	430	9	+	Lycopersicon esculentum	cis-acting regulatory element involved in circadian control	circadian control	Growth and development
BnERF-26	circadian	CAAAGATATC	1630	9	+	Lycopersicon esculentum	cis-acting regulatory element involved in circadian control	circadian control	Growth and development
BnAP2-10	TC-rich repeats	GTTTTCTTAC	1014	9	+	Nicotiana tabacum	cis-acting element involved in defense and stress responsiveness	defense and stress responsiveness	Stress
BnAP2-11	TC-rich repeats	GTTTTCTTAC	1935	9	+	Nicotiana tabacum	cis-acting element involved in defense and stress responsiveness	defense and stress responsiveness	Stress
BnAP2-13	TC-rich repeats	GTTTTCTTAC	1532	9	-	Nicotiana tabacum	cis-acting element involved in defense and stress responsiveness	defense and stress responsiveness	Stress
BnAP2-14	TC-rich repeats	ATTCTCTAAC	1340	9	+	Nicotiana tabacum	cis-acting element involved in defense and stress responsiveness	defense and stress responsiveness	Stress
BnAP2-2	TC-rich repeats	GTTTTCTTAC	997	9	+	Nicotiana tabacum	cis-acting element involved in defense and stress responsiveness	defense and stress responsiveness	Stress
BnAP2-7	TC-rich repeats	ATTCTCTAAC	1474	9	+	Nicotiana tabacum	cis-acting element involved in defense and stress responsiveness	defense and stress responsiveness	Stress
BnDREB-11	TC-rich repeats	ATTCTCTAAC	1668	9	+	Nicotiana tabacum	cis-acting element involved in defense and stress responsiveness	defense and stress responsiveness	Stress
BnDREB-12	TC-rich repeats	ATTCTCTAAC	244	10	+	Nicotiana tabacum	cis-acting element involved in defense and stress responsiveness	defense and stress responsiveness	Stress
BnDREB-14	TC-rich repeats	GTTTTCTTAC	1923	9	-	Nicotiana tabacum	cis-acting element involved in defense and stress responsiveness	defense and stress responsiveness	Stress
BnDREB-15	TC-rich repeats	ATTCTCTAAC	42	9	+	Nicotiana tabacum	cis-acting element involved in defense and stress responsiveness	defense and stress responsiveness	Stress
BnDREB-15	TC-rich repeats	GTTTTCTTAC	691	9	-	Nicotiana tabacum	cis-acting element involved in defense and stress responsiveness	defense and stress responsiveness	Stress
BnDREB-15	TC-rich repeats	GTTTTCTTAC	1882	9	+	Nicotiana tabacum	cis-acting element involved in defense and stress responsiveness	defense and stress responsiveness	Stress
BnDREB-17	TC-rich repeats	ATTCTCTAAC	1268	9	-	Nicotiana tabacum	cis-acting element involved in defense and stress responsiveness	defense and stress responsiveness	Stress
BnDREB-18	TC-rich repeats	GTTTTCTTAC	406	10	+	Nicotiana tabacum	cis-acting element involved in defense and stress responsiveness	defense and stress responsiveness	Stress
BnDREB-20	TC-rich repeats	ATTCTCTAAC	1504	9	+	Nicotiana tabacum	cis-acting element involved in defense and stress responsiveness	defense and stress responsiveness	Stress
BnDREB-21	TC-rich repeats	GTTTTCTTAC	420	9	+	Nicotiana tabacum	cis-acting element involved in defense and stress responsiveness	defense and stress responsiveness	Stress
BnDREB-3	TC-rich repeats	ATTCTCTAAC	436	9	-	Nicotiana tabacum	cis-acting element involved in defense and stress responsiveness	defense and stress responsiveness	Stress
BnDREB-7	TC-rich repeats	GTTTTCTTAC	785	9	-	Nicotiana tabacum	cis-acting element involved in defense and stress responsiveness	defense and stress responsiveness	Stress
BnDREB-8	TC-rich repeats	ATTCTCTAAC	1317	9	+	Nicotiana tabacum	cis-acting element involved in defense and stress responsiveness	defense and stress responsiveness	Stress
BnERF-1	TC-rich repeats	ATTCTCTAAC	1553	9	-	Nicotiana tabacum	cis-acting element involved in defense and stress responsiveness	defense and stress responsiveness	Stress
BnERF-11	TC-rich repeats	GTTTTCTTAC	1456	9	+	Nicotiana tabacum	cis-acting element involved in defense and stress responsiveness	defense and stress responsiveness	Stress
BnERF-11	TC-rich repeats	ATTCTCTAAC	1765	9	+	Nicotiana tabacum	cis-acting element involved in defense and stress responsiveness	defense and stress responsiveness	Stress
BnERF-13	TC-rich repeats	GTTTTCTTAC	19	9	-	Nicotiana tabacum	cis-acting element involved in defense and stress responsiveness	defense and stress responsiveness	Stress
BnERF-19	TC-rich repeats	GTTTTCTTAC	538	9	+	Nicotiana tabacum	cis-acting element involved in defense and stress responsiveness	defense and stress responsiveness	Stress
BnERF-2	TC-rich repeats	GTTTTCTTAC	1587	9	+	Nicotiana tabacum	cis-acting element involved in defense and stress responsiveness	defense and stress responsiveness	Stress
BnERF-23	TC-rich repeats	ATTCTCTAAC	1735	9	-	Nicotiana tabacum	cis-acting element involved in defense and stress responsiveness	defense and stress responsiveness	Stress
BnERF-25	TC-rich repeats	ATTCTCTAAC	1243	9	+	Nicotiana tabacum	cis-acting element involved in defense and stress responsiveness	defense and stress responsiveness	Stress
BnERF-26	TC-rich repeats	ATTCTCTAAC	1852	9	+	Nicotiana tabacum	cis-acting element involved in defense and stress responsiveness	defense and stress responsiveness	Stress
BnERF-3	TC-rich repeats	GTTTTCTTAC	23	9	-	Nicotiana tabacum	cis-acting element involved in defense and stress responsiveness	defense and stress responsiveness	Stress
BnERF-31	TC-rich repeats	GTTTTCTTAC	764	9	+	Nicotiana tabacum	cis-acting element involved in defense and stress responsiveness	defense and stress responsiveness	Stress
BnERF-32	TC-rich repeats	ATTCTCTAAC	1104	9	+	Nicotiana tabacum	cis-acting element involved in defense and stress responsiveness	defense and stress responsiveness	Stress
BnERF-34	TC-rich repeats	ATTCTCTAAC	727	9	-	Nicotiana tabacum	cis-acting element involved in defense and stress responsiveness	defense and stress responsiveness	Stress
BnERF-37	TC-rich repeats	ATTCTCTAAC	1239	9	+	Nicotiana tabacum	cis-acting element involved in defense and stress responsiveness	defense and stress responsiveness	Stress
BnERF-38	TC-rich repeats	ATTCTCTAAC	211	10	-	Nicotiana tabacum	cis-acting element involved in defense and stress responsiveness	defense and stress responsiveness	Stress
BnERF-41	TC-rich repeats	ATTCTCTAAC	207	9	-	Nicotiana tabacum	cis-acting element involved in defense and stress responsiveness	defense and stress responsiveness	Stress
BnERF-8	TC-rich repeats	GTTTTCTTAC	1046	9	+	Nicotiana tabacum	cis-acting element involved in defense and stress responsiveness	defense and stress responsiveness	Stress
BnERF-8	TC-rich repeats	GTTTTCTTAC	1525	9	-	Nicotiana tabacum	cis-acting element involved in defense and stress responsiveness	defense and stress responsiveness	Stress
BnERF-9	TC-rich repeats	ATTCTCTAAC	1667	9	+	Nicotiana tabacum	cis-acting element involved in defense and stress responsiveness	defense and stress responsiveness	Stress
BnRAV-3	TC-rich repeats	ATTCTCTAAC	126	9	-	Nicotiana tabacum	cis-acting element involved in defense and stress responsiveness	defense and stress responsiveness	Stress
BnAP2-1	MBS	CAACTG	202	6	+	Arabidopsis thaliana	MYB binding site involved in drought-inducibility	Drought-inducibility	Stress
BnAP2-1	MBS	CAACTG	1286	6	-	Arabidopsis thaliana	MYB binding site involved in drought-inducibility	Drought-inducibility	Stress
BnAP2-10	MBS	CAACTG	183	6	-	Arabidopsis thaliana	MYB binding site involved in drought-inducibility	Drought-inducibility	Stress
BnAP2-2	MBS	CAACTG	694	6	-	Arabidopsis thaliana	MYB binding site involved in drought-inducibility	Drought-inducibility	Stress
BnAP2-4	MBS	CAACTG	772	6	-	Arabidopsis thaliana	MYB binding site involved in drought-inducibility	Drought-inducibility	Stress
BnAP2-7	MBS	CAACTG	498	6	-	Arabidopsis thaliana	MYB binding site involved in drought-inducibility	Drought-inducibility	Stress
BnDREB-13	MBS	CAACTG	178	6	-	Arabidopsis thaliana	MYB binding site involved in drought-inducibility	Drought-inducibility	Stress
BnDREB-15	MBS	CAACTG	1015	6	+	Arabidopsis thaliana	MYB binding site involved in drought-inducibility	Drought-inducibility	Stress
BnDREB-15	MBS	CAACTG	1755	6	+	Arabidopsis thaliana	MYB binding site involved in drought-inducibility	Drought-inducibility	Stress
BnDREB-18	MBS	CAACTG	1520	6	+	Arabidopsis thaliana	MYB binding site involved in drought-inducibility	Drought-inducibility	Stress
BnDREB-18	MBS	CAACTG	1610	6	-	Arabidopsis thaliana	MYB binding site involved in drought-inducibility	Drought-inducibility	Stress
BnDREB-20	MBS	CAACTG	1565	6	+	Arabidopsis thaliana	MYB binding site involved in drought-inducibility	Drought-inducibility	Stress
BnDREB-3	MBS	CAACTG	214	6	+	Arabidopsis thaliana	MYB binding site involved in drought-inducibility	Drought-inducibility	Stress
BnDREB-4	MBS	CAACTG	432	6	-	Arabidopsis thaliana	MYB binding site involved in drought-inducibility	Drought-inducibility	Stress
BnDREB-6	MBS	CAACTG	37	6	-	Arabidopsis thaliana	MYB binding site involved in drought-inducibility	Drought-inducibility	Stress
BnDREB-6	MBS	CAACTG	1457	6	-	Arabidopsis thaliana	MYB binding site involved in drought-inducibility	Drought-inducibility	Stress
BnDREB-9	MBS	CAACTG	474	6	-	Arabidopsis thaliana	MYB binding site involved in drought-inducibility	Drought-inducibility	Stress
BnERF-10	MBS	CAACTG	1816	6	+	Arabidopsis thaliana	MYB binding site involved in drought-inducibility	Drought-inducibility	Stress
BnERF-13	MBS	CAACTG	1722	6	+	Arabidopsis thaliana	MYB binding site involved in drought-inducibility	Drought-inducibility	Stress
BnERF-13	MBS	CAACTG	1950	6	+	Arabidopsis thaliana	MYB binding site involved in drought-inducibility	Drought-inducibility	Stress
BnERF-17	MBS	CAACTG	963	6	-	Arabidopsis thaliana	MYB binding site involved in drought-inducibility	Drought-inducibility	Stress
BnERF-18	MBS	CAACTG	30	6	-	Arabidopsis thaliana	MYB binding site involved in drought-inducibility	Drought-inducibility	Stress
BnERF-23	MBS	CAACTG	1571	6	-	Arabidopsis thaliana	MYB binding site involved in drought-inducibility	Drought-inducibility	Stress
BnERF-24	MBS	CAACTG	1692	6	+	Arabidopsis thaliana	MYB binding site involved in drought-inducibility	Drought-inducibility	Stress
BnERF-25	MBS	CAACTG	1508	6	+	Arabidopsis thaliana	MYB binding site involved in drought-inducibility	Drought-inducibility	Stress
BnERF-26	MBS	CAACTG	577	6	-	Arabidopsis thaliana	MYB binding site involved in drought-inducibility	Drought-inducibility	Stress
BnERF-26	MBS	CAACTG	1281	6	-	Arabidopsis thaliana	MYB binding site involved in drought-inducibility	Drought-inducibility	Stress
BnERF-29	MBS	CAACTG	1725	6	-	Arabidopsis thaliana	MYB binding site involved in drought-inducibility	Drought-inducibility	Stress
BnERF-3	MBS	CAACTG	302	6	-	Arabidopsis thaliana	MYB binding site involved in drought-inducibility	Drought-inducibility	Stress
BnERF-32	MBS	CAACTG	129	6	-	Arabidopsis thaliana	MYB binding site involved in drought-inducibility	Drought-inducibility	Stress
BnERF-34	MBS	CAACTG	1657	6	+	Arabidopsis thaliana	MYB binding site involved in drought-inducibility	Drought-inducibility	Stress
BnERF-34	MBS	CAACTG	1771	6	+	Arabidopsis thaliana	MYB binding site involved in drought-inducibility	Drought-inducibility	Stress
BnERF-36	MBS	CAACTG	1133	6	-	Arabidopsis thaliana	MYB binding site involved in drought-inducibility	Drought-inducibility	Stress
BnERF-36	MBS	CAACTG	1535	6	+	Arabidopsis thaliana	MYB binding site involved in drought-inducibility	Drought-inducibility	Stress
BnERF-38	MBS	CAACTG	430	6	-	Arabidopsis thaliana	MYB binding site involved in drought-inducibility	Drought-inducibility	Stress
BnERF-38	MBS	CAACTG	1309	6	+	Arabidopsis thaliana	MYB binding site involved in drought-inducibility	Drought-inducibility	Stress
BnERF-5	MBS	CAACTG	1978	6	+	Arabidopsis thaliana	MYB binding site involved in drought-inducibility	Drought-inducibility	Stress
BnERF-6	MBS	CAACTG	520	6	+	Arabidopsis thaliana	MYB binding site involved in drought-inducibility	Drought-inducibility	Stress
BnERF-6	MBS	CAACTG	1559	6	-	Arabidopsis thaliana	MYB binding site involved in drought-inducibility	Drought-inducibility	Stress
BnRAV-2	MBS	CAACTG	214	6	+	Arabidopsis thaliana	MYB binding site involved in drought-inducibility	Drought-inducibility	Stress
BnRAV-3	MBS	CAACTG	1082	6	-	Arabidopsis thaliana	MYB binding site involved in drought-inducibility	Drought-inducibility	Stress
BnRAV-3	MBS	CAACTG	1302	6	-	Arabidopsis thaliana	MYB binding site involved in drought-inducibility	Drought-inducibility	Stress
BnAP2-3	AT-rich sequence	TAAAATACT	81	9	-	Pisum sativum	element for maximal elicitor-mediated activation (2copies)	elicitor-mediated activation	Growth and development
BnDREB-10	AT-rich sequence	TAAAATACT	667	9	-	Pisum sativum	element for maximal elicitor-mediated activation (2copies)	elicitor-mediated activation	Growth and development
BnDREB-10	AT-rich sequence	TAAAATACT	1534	9	-	Pisum sativum	element for maximal elicitor-mediated activation (2copies)	elicitor-mediated activation	Growth and development
BnDREB-4	AT-rich sequence	TAAAATACT	621	9	-	Pisum sativum	element for maximal elicitor-mediated activation (2copies)	elicitor-mediated activation	Growth and development
BnERF-19	AT-rich sequence	TAAAATACT	383	9	+	Pisum sativum	element for maximal elicitor-mediated activation (2copies)	elicitor-mediated activation	Growth and development
BnERF-24	AT-rich sequence	TAAAATACT	1195	9	-	Pisum sativum	element for maximal elicitor-mediated activation (2copies)	elicitor-mediated activation	Growth and development
BnERF-30	AT-rich sequence	TAAAATACT	857	9	+	Pisum sativum	element for maximal elicitor-mediated activation (2copies)	elicitor-mediated activation	Growth and development
BnERF-36	AT-rich sequence	TAAAATACT	1877	9	+	Pisum sativum	element for maximal elicitor-mediated activation (2copies)	elicitor-mediated activation	Growth and development
BnERF-37	AT-rich sequence	TAAAATACT	1585	9	+	Pisum sativum	element for maximal elicitor-mediated activation (2copies)	elicitor-mediated activation	Growth and development
BnAP2-10	GCN4_motif	TGAGTCA	696	7	+	Oryza sativa	cis-regulatory element involved in endosperm expression	endosperm expression	Growth and development
BnAP2-16	GCN4_motif	TGAGTCA	523	7	+	Oryza sativa	cis-regulatory element involved in endosperm expression	endosperm expression	Growth and development
BnAP2-2	GCN4_motif	TGAGTCA	65	7	-	Oryza sativa	cis-regulatory element involved in endosperm expression	endosperm expression	Growth and development
BnAP2-4	GCN4_motif	TGAGTCA	278	7	-	Oryza sativa	cis-regulatory element involved in endosperm expression	endosperm expression	Growth and development
BnDREB-11	GCN4_motif	TGAGTCA	381	7	-	Oryza sativa	cis-regulatory element involved in endosperm expression	endosperm expression	Growth and development
BnDREB-16	GCN4_motif	TGAGTCA	339	7	-	Oryza sativa	cis-regulatory element involved in endosperm expression	endosperm expression	Growth and development
BnDREB-16	GCN4_motif	TGAGTCA	403	7	-	Oryza sativa	cis-regulatory element involved in endosperm expression	endosperm expression	Growth and development
BnDREB-18	GCN4_motif	TGAGTCA	451	7	+	Oryza sativa	cis-regulatory element involved in endosperm expression	endosperm expression	Growth and development
BnDREB-19	GCN4_motif	TGAGTCA	1636	7	-	Oryza sativa	cis-regulatory element involved in endosperm expression	endosperm expression	Growth and development
BnDREB-3	GCN4_motif	TGAGTCA	331	7	+	Oryza sativa	cis-regulatory element involved in endosperm expression	endosperm expression	Growth and development
BnDREB-5	GCN4_motif	TGAGTCA	1804	7	+	Oryza sativa	cis-regulatory element involved in endosperm expression	endosperm expression	Growth and development
BnERF-16	GCN4_motif	TGAGTCA	1691	7	+	Oryza sativa	cis-regulatory element involved in endosperm expression	endosperm expression	Growth and development
BnERF-24	GCN4_motif	TGAGTCA	280	7	-	Oryza sativa	cis-regulatory element involved in endosperm expression	endosperm expression	Growth and development
BnERF-29	GCN4_motif	TGAGTCA	590	7	-	Oryza sativa	cis-regulatory element involved in endosperm expression	endosperm expression	Growth and development
BnERF-3	GCN4_motif	TGAGTCA	1715	7	-	Oryza sativa	cis-regulatory element involved in endosperm expression	endosperm expression	Growth and development
BnERF-32	GCN4_motif	TGAGTCA	783	7	+	Oryza sativa	cis-regulatory element involved in endosperm expression	endosperm expression	Growth and development
BnERF-4	GCN4_motif	TGAGTCA	366	7	-	Oryza sativa	cis-regulatory element involved in endosperm expression	endosperm expression	Growth and development
BnERF-5	GCN4_motif	TGAGTCA	1156	7	-	Oryza sativa	cis-regulatory element involved in endosperm expression	endosperm expression	Growth and development
BnERF-6	GCN4_motif	TGAGTCA	1625	7	-	Oryza sativa	cis-regulatory element involved in endosperm expression	endosperm expression	Growth and development
BnAP2-9	AACA_motif	TAACAAACTCCA	258	11	+	Oryza sativa	involved in endosperm-specific negative expression	endosperm-specific negative expression	Growth and development
BnERF-10	MBSI	aaaAaaC(G/C)GTTA	536	10.5	-	Petunia hybrida	MYB binding site involved in flavonoid biosynthetic genes regulation	flavonoid biosynthetic genes regulation	Growth and development
BnERF-10	MBSI	aaaAaaC(G/C)GTTA	1277	11	-	Petunia hybrida	MYB binding site involved in flavonoid biosynthetic genes regulation	flavonoid biosynthetic genes regulation	Growth and development
BnERF-31	MBSI	aaaAaaC(G/C)GTTA	174	10.5	+	Petunia hybrida	MYB binding site involved in flavonoid biosynthetic genes regulation	flavonoid biosynthetic genes regulation	Growth and development
BnERF-38	MBSI	aaaAaaC(G/C)GTTA	1104	10.5	-	Petunia hybrida	MYB binding site involved in flavonoid biosynthetic genes regulation	flavonoid biosynthetic genes regulation	Growth and development
BnRAV-1	MBSI	aaaAaaC(G/C)GTTA	758	10.5	-	Petunia hybrida	MYB binding site involved in flavonoid biosynthetic genes regulation	flavonoid biosynthetic genes regulation	Growth and development
BnRAV-3	MBSI	aaaAaaC(G/C)GTTA	964	10.5	-	Petunia hybrida	MYB binding site involved in flavonoid biosynthetic genes regulation	flavonoid biosynthetic genes regulation	Growth and development
BnAP2-15	TATC-box	TATCCCA	1210	7	-	Oryza sativa	cis-acting element involved in gibberellin-responsiveness	GA responsiveness	Hormone
BnAP2-7	TATC-box	TATCCCA	1255	7	-	Oryza sativa	cis-acting element involved in gibberellin-responsiveness	GA responsiveness	Hormone
BnAP2-8	TATC-box	TATCCCA	1583	7	-	Oryza sativa	cis-acting element involved in gibberellin-responsiveness	GA responsiveness	Hormone
BnDREB-1	TATC-box	TATCCCA	1123	7	-	Oryza sativa	cis-acting element involved in gibberellin-responsiveness	GA responsiveness	Hormone
BnDREB-16	TATC-box	TATCCCA	1244	7	+	Oryza sativa	cis-acting element involved in gibberellin-responsiveness	GA responsiveness	Hormone
BnDREB-19	TATC-box	TATCCCA	82	7	-	Oryza sativa	cis-acting element involved in gibberellin-responsiveness	GA responsiveness	Hormone
BnDREB-3	TATC-box	TATCCCA	983	7	-	Oryza sativa	cis-acting element involved in gibberellin-responsiveness	GA responsiveness	Hormone
BnDREB-3	TATC-box	TATCCCA	1351	7	-	Oryza sativa	cis-acting element involved in gibberellin-responsiveness	GA responsiveness	Hormone
BnERF-10	TATC-box	TATCCCA	1856	7	+	Oryza sativa	cis-acting element involved in gibberellin-responsiveness	GA responsiveness	Hormone
BnERF-14	TATC-box	TATCCCA	975	7	-	Oryza sativa	cis-acting element involved in gibberellin-responsiveness	GA responsiveness	Hormone
BnERF-17	TATC-box	TATCCCA	1252	7	-	Oryza sativa	cis-acting element involved in gibberellin-responsiveness	GA responsiveness	Hormone
BnERF-2	TATC-box	TATCCCA	1781	7	+	Oryza sativa	cis-acting element involved in gibberellin-responsiveness	GA responsiveness	Hormone
BnERF-22	TATC-box	TATCCCA	253	7	+	Oryza sativa	cis-acting element involved in gibberellin-responsiveness	GA responsiveness	Hormone
BnERF-37	TATC-box	TATCCCA	334	7	+	Oryza sativa	cis-acting element involved in gibberellin-responsiveness	GA responsiveness	Hormone
BnRAV-1	TATC-box	TATCCCA	1875	7	+	Oryza sativa	cis-acting element involved in gibberellin-responsiveness	GA responsiveness	Hormone
BnAP2-1	GARE-motif	TCTGTTG	662	7	-	Brassica oleracea	gibberellin-responsive element	GA responsiveness	Hormone
BnAP2-13	P-box	CCTTTTG	1541	7	-	Oryza sativa	gibberellin-responsive element	GA responsiveness	Hormone
BnAP2-13	P-box	CCTTTTG	1773	7	+	Oryza sativa	gibberellin-responsive element	GA responsiveness	Hormone
BnAP2-16	P-box	CCTTTTG	1988	7	-	Oryza sativa	gibberellin-responsive element	GA responsiveness	Hormone
BnAP2-18	GARE-motif	TCTGTTG	1228	7	+	Brassica oleracea	gibberellin-responsive element	GA responsiveness	Hormone
BnAP2-7	P-box	CCTTTTG	140	7	+	Oryza sativa	gibberellin-responsive element	GA responsiveness	Hormone
BnAP2-7	P-box	CCTTTTG	484	7	+	Oryza sativa	gibberellin-responsive element	GA responsiveness	Hormone
BnAP2-7	P-box	CCTTTTG	1656	7	+	Oryza sativa	gibberellin-responsive element	GA responsiveness	Hormone
BnAP2-8	P-box	CCTTTTG	1412	7	+	Oryza sativa	gibberellin-responsive element	GA responsiveness	Hormone
BnAP2-9	P-box	CCTTTTG	417	7	+	Oryza sativa	gibberellin-responsive element	GA responsiveness	Hormone
BnDREB-13	P-box	CCTTTTG	1079	7	-	Oryza sativa	gibberellin-responsive element	GA responsiveness	Hormone
BnDREB-14	P-box	CCTTTTG	738	7	-	Oryza sativa	gibberellin-responsive element	GA responsiveness	Hormone
BnDREB-15	GARE-motif	TCTGTTG	36	7	-	Brassica oleracea	gibberellin-responsive element	GA responsiveness	Hormone
BnDREB-17	GARE-motif	TCTGTTG	302	7	-	Brassica oleracea	gibberellin-responsive element	GA responsiveness	Hormone
BnDREB-5	P-box	CCTTTTG	1485	7	-	Oryza sativa	gibberellin-responsive element	GA responsiveness	Hormone
BnDREB-6	P-box	CCTTTTG	607	7	-	Oryza sativa	gibberellin-responsive element	GA responsiveness	Hormone
BnDREB-6	P-box	CCTTTTG	685	7	-	Oryza sativa	gibberellin-responsive element	GA responsiveness	Hormone
BnDREB-6	P-box	CCTTTTG	941	7	-	Oryza sativa	gibberellin-responsive element	GA responsiveness	Hormone
BnDREB-6	GARE-motif	TCTGTTG	1165	7	+	Brassica oleracea	gibberellin-responsive element	GA responsiveness	Hormone
BnDREB-8	GARE-motif	TCTGTTG	1298	7	+	Brassica oleracea	gibberellin-responsive element	GA responsiveness	Hormone
BnERF-10	P-box	CCTTTTG	1658	7	+	Oryza sativa	gibberellin-responsive element	GA responsiveness	Hormone
BnERF-11	GARE-motif	TCTGTTG	1516	7	-	Brassica oleracea	gibberellin-responsive element	GA responsiveness	Hormone
BnERF-13	GARE-motif	TCTGTTG	1977	7	-	Brassica oleracea	gibberellin-responsive element	GA responsiveness	Hormone
BnERF-16	P-box	CCTTTTG	1830	7	-	Oryza sativa	gibberellin-responsive element	GA responsiveness	Hormone
BnERF-18	P-box	CCTTTTG	1270	7	-	Oryza sativa	gibberellin-responsive element	GA responsiveness	Hormone
BnERF-2	P-box	CCTTTTG	1539	7	-	Oryza sativa	gibberellin-responsive element	GA responsiveness	Hormone
BnERF-26	P-box	CCTTTTG	301	7	+	Oryza sativa	gibberellin-responsive element	GA responsiveness	Hormone
BnERF-27	P-box	CCTTTTG	704	7	-	Oryza sativa	gibberellin-responsive element	GA responsiveness	Hormone
BnERF-27	P-box	CCTTTTG	759	7	-	Oryza sativa	gibberellin-responsive element	GA responsiveness	Hormone
BnERF-28	GARE-motif	TCTGTTG	558	7	-	Brassica oleracea	gibberellin-responsive element	GA responsiveness	Hormone
BnERF-28	P-box	CCTTTTG	433	7	+	Oryza sativa	gibberellin-responsive element	GA responsiveness	Hormone
BnERF-3	GARE-motif	TCTGTTG	1115	7	+	Brassica oleracea	gibberellin-responsive element	GA responsiveness	Hormone
BnERF-31	P-box	CCTTTTG	1744	7	-	Oryza sativa	gibberellin-responsive element	GA responsiveness	Hormone
BnERF-38	GARE-motif	TCTGTTG	39	7	-	Brassica oleracea	gibberellin-responsive element	GA responsiveness	Hormone
BnERF-38	P-box	CCTTTTG	361	7	-	Oryza sativa	gibberellin-responsive element	GA responsiveness	Hormone
BnERF-39	P-box	CCTTTTG	1246	7	-	Oryza sativa	gibberellin-responsive element	GA responsiveness	Hormone
BnERF-5	GARE-motif	TCTGTTG	1913	7	-	Brassica oleracea	gibberellin-responsive element	GA responsiveness	Hormone
BnERF-5	P-box	CCTTTTG	1050	7	+	Oryza sativa	gibberellin-responsive element	GA responsiveness	Hormone
BnRAV-2	P-box	CCTTTTG	1334	7	+	Oryza sativa	gibberellin-responsive element	GA responsiveness	Hormone
BnRAV-2	P-box	CCTTTTG	1865	7	-	Oryza sativa	gibberellin-responsive element	GA responsiveness	Hormone
BnRAV-3	GARE-motif	TCTGTTG	201	7	+	Brassica oleracea	gibberellin-responsive element	GA responsiveness	Hormone
BnERF-42	TATC-box	TATCCCA	1771	7	+	Oryza sativa	cis-acting element involved in gibberellin-responsiveness	GA responsiveness	Hormone
BnERF-42	P-box	CCTTTTG	1792	7	+	Oryza sativa	gibberellin-responsive element	GA responsiveness	Hormone
BnAP2-1	GT1-motif	GGTTAA	497	6	+	Arabidopsis thaliana	light responsive element	light responsiveness	Light
BnAP2-1	GT1-motif	GGTTAA	1449	6	+	Arabidopsis thaliana	light responsive element	light responsiveness	Light
BnAP2-10	GT1-motif	GGTTAAT	1381	7	-	Avena sativa	light responsive element	light responsiveness	Light
BnAP2-10	GT1-motif	GGTTAA	1382	6	-	Arabidopsis thaliana	light responsive element	light responsiveness	Light
BnAP2-10	GT1-motif	GGTTAA	1391	6	+	Arabidopsis thaliana	light responsive element	light responsiveness	Light
BnAP2-10	GT1-motif	GGTTAA	1400	6	-	Arabidopsis thaliana	light responsive element	light responsiveness	Light
BnAP2-11	GT1-motif	GGTTAAT	637	7	+	Avena sativa	light responsive element	light responsiveness	Light
BnAP2-12	Sp1	GGGCGG	80	6	-	Oryza sativa	light responsive element	light responsiveness	Light
BnAP2-12	Sp1	GGGCGG	100	6	-	Oryza sativa	light responsive element	light responsiveness	Light
BnAP2-12	Sp1	GGGCGG	107	6	-	Oryza sativa	light responsive element	light responsiveness	Light
BnAP2-12	Sp1	GGGCGG	126	6	-	Oryza sativa	light responsive element	light responsiveness	Light
BnAP2-13	GT1-motif	GGTTAA	1150	6	+	Arabidopsis thaliana	light responsive element	light responsiveness	Light
BnAP2-15	3-AF1 binding site	TAAGAGAGGAA	1555	10	-	Solanum tuberosum	light responsive element	light responsiveness	Light
BnAP2-15	GT1-motif	GGTTAA	189	6	-	Arabidopsis thaliana	light responsive element	light responsiveness	Light
BnAP2-17	Sp1	GGGCGG	885	6	+	Oryza sativa	light responsive element	light responsiveness	Light
BnAP2-18	GT1-motif	GTGTGTGAA	319	9	-	Solanum tuberosum	light responsive element	light responsiveness	Light
BnAP2-2	GT1-motif	GGTTAAT	1576	7	-	Avena sativa	light responsive element	light responsiveness	Light
BnAP2-2	GT1-motif	GGTTAA	1577	6	-	Arabidopsis thaliana	light responsive element	light responsiveness	Light
BnAP2-4	GT1-motif	GGTTAA	30	6	+	Arabidopsis thaliana	light responsive element	light responsiveness	Light
BnAP2-5	GT1-motif	GGTTAA	932	6	-	Arabidopsis thaliana	light responsive element	light responsiveness	Light
BnAP2-5	GT1-motif	GTGTGTGAA	1921	9	-	Solanum tuberosum	light responsive element	light responsiveness	Light
BnAP2-6	GT1-motif	GGTTAA	932	6	-	Arabidopsis thaliana	light responsive element	light responsiveness	Light
BnAP2-6	GT1-motif	GTGTGTGAA	1921	9	-	Solanum tuberosum	light responsive element	light responsiveness	Light
BnAP2-8	GT1-motif	GGTTAA	1196	6	+	Arabidopsis thaliana	light responsive element	light responsiveness	Light
BnDREB-10	GT1-motif	GGTTAA	3	6	+	Arabidopsis thaliana	light responsive element	light responsiveness	Light
BnDREB-10	GT1-motif	GGTTAA	415	6	+	Arabidopsis thaliana	light responsive element	light responsiveness	Light
BnDREB-11	Sp1	GGGCGG	1033	6	-	Oryza sativa	light responsive element	light responsiveness	Light
BnDREB-13	GT1-motif	GTGTGTGAA	910	9	-	Solanum tuberosum	light responsive element	light responsiveness	Light
BnDREB-14	GT1-motif	GGTTAA	74	6	-	Arabidopsis thaliana	light responsive element	light responsiveness	Light
BnDREB-14	GT1-motif	GGTTAAT	750	7	-	Avena sativa	light responsive element	light responsiveness	Light
BnDREB-14	GT1-motif	GGTTAA	751	6	-	Arabidopsis thaliana	light responsive element	light responsiveness	Light
BnDREB-14	GT1-motif	GGTTAAT	1347	7	+	Avena sativa	light responsive element	light responsiveness	Light
BnDREB-14	Sp1	GGGCGG	1898	6	-	Oryza sativa	light responsive element	light responsiveness	Light
BnDREB-16	GT1-motif	GGTTAAT	854	7	-	Avena sativa	light responsive element	light responsiveness	Light
BnDREB-16	GT1-motif	GGTTAA	855	6	-	Arabidopsis thaliana	light responsive element	light responsiveness	Light
BnDREB-17	GT1-motif	GGTTAAT	90	7	-	Avena sativa	light responsive element	light responsiveness	Light
BnDREB-17	GT1-motif	GGTTAA	91	6	-	Arabidopsis thaliana	light responsive element	light responsiveness	Light
BnDREB-17	GT1-motif	GGTTAA	242	6	-	Arabidopsis thaliana	light responsive element	light responsiveness	Light
BnDREB-17	Sp1	GGGCGG	673	6	-	Oryza sativa	light responsive element	light responsiveness	Light
BnDREB-19	GT1-motif	GTGTGTGAA	266	9	+	Solanum tuberosum	light responsive element	light responsiveness	Light
BnDREB-2	GT1-motif	GGTTAA	1224	6	-	Arabidopsis thaliana	light responsive element	light responsiveness	Light
BnDREB-20	Sp1	GGGCGG	1773	6	-	Oryza sativa	light responsive element	light responsiveness	Light
BnDREB-20	GT1-motif	GGTTAAT	673	7	+	Avena sativa	light responsive element	light responsiveness	Light
BnDREB-20	GT1-motif	GGTTAA	791	6	-	Arabidopsis thaliana	light responsive element	light responsiveness	Light
BnDREB-5	GT1-motif	GGTTAAT	1347	7	-	Avena sativa	light responsive element	light responsiveness	Light
BnDREB-5	GT1-motif	GGTTAA	1348	6	-	Arabidopsis thaliana	light responsive element	light responsiveness	Light
BnDREB-6	GT1-motif	GTGTGTGAA	1850	9	-	Solanum tuberosum	light responsive element	light responsiveness	Light
BnDREB-7	AAAC-motif	CAATCAAAACCT	794	11	+	Spinacia oleracea	light responsive element	light responsiveness	Light
BnDREB-7	GT1-motif	GGTTAA	161	6	-	Arabidopsis thaliana	light responsive element	light responsiveness	Light
BnDREB-7	GT1-motif	GGTTAA	213	6	-	Arabidopsis thaliana	light responsive element	light responsiveness	Light
BnDREB-7	GT1-motif	GGTTAA	1064	6	+	Arabidopsis thaliana	light responsive element	light responsiveness	Light
BnDREB-9	GT1-motif	GGTTAA	1110	6	-	Arabidopsis thaliana	light responsive element	light responsiveness	Light
BnERF-1	GT1-motif	GGTTAA	669	6	-	Arabidopsis thaliana	light responsive element	light responsiveness	Light
BnERF-1	GT1-motif	GGTTAA	1539	6	+	Arabidopsis thaliana	light responsive element	light responsiveness	Light
BnERF-1	GT1-motif	GGTTAAT	1839	7	-	Avena sativa	light responsive element	light responsiveness	Light
BnERF-1	GT1-motif	GGTTAA	1840	6	-	Arabidopsis thaliana	light responsive element	light responsiveness	Light
BnERF-10	GT1-motif	GGTTAAT	1250	7	+	Avena sativa	light responsive element	light responsiveness	Light
BnERF-11	GT1-motif	GGTTAA	829	6	-	Arabidopsis thaliana	light responsive element	light responsiveness	Light
BnERF-11	GT1-motif	GGTTAA	878	6	+	Arabidopsis thaliana	light responsive element	light responsiveness	Light
BnERF-11	GT1-motif	GGTTAA	880	6	-	Arabidopsis thaliana	light responsive element	light responsiveness	Light
BnERF-11	GT1-motif	GGTTAA	1130	6	+	Arabidopsis thaliana	light responsive element	light responsiveness	Light
BnERF-11	GT1-motif	GGTTAA	1397	6	+	Arabidopsis thaliana	light responsive element	light responsiveness	Light
BnERF-11	GT1-motif	GGTTAA	1937	6	-	Arabidopsis thaliana	light responsive element	light responsiveness	Light
BnERF-11	AAAC-motif	CAATCAAAACCT	299	11	-	Spinacia oleracea	light responsive element	light responsiveness	Light
BnERF-14	GT1-motif	GGTTAA	111	6	-	Arabidopsis thaliana	light responsive element	light responsiveness	Light
BnERF-15	GT1-motif	GGTTAA	666	6	-	Arabidopsis thaliana	light responsive element	light responsiveness	Light
BnERF-15	GT1-motif	GGTTAAT	747	7	-	Avena sativa	light responsive element	light responsiveness	Light
BnERF-15	GT1-motif	GGTTAA	748	6	-	Arabidopsis thaliana	light responsive element	light responsiveness	Light
BnERF-16	GT1-motif	GGTTAA	1332	6	-	Arabidopsis thaliana	light responsive element	light responsiveness	Light
BnERF-17	GT1-motif	GGTTAA	440	6	-	Arabidopsis thaliana	light responsive element	light responsiveness	Light
BnERF-17	GT1-motif	GGTTAA	956	6	+	Arabidopsis thaliana	light responsive element	light responsiveness	Light
BnERF-17	GT1-motif	GGTTAA	1309	6	+	Arabidopsis thaliana	light responsive element	light responsiveness	Light
BnERF-18	GT1-motif	GGTTAA	200	6	+	Arabidopsis thaliana	light responsive element	light responsiveness	Light
BnERF-19	AAAC-motif	CAATCAAAACCT	1982	11	-	Spinacia oleracea	light responsive element	light responsiveness	Light
BnERF-19	GT1-motif	GGTTAA	328	6	+	Arabidopsis thaliana	light responsive element	light responsiveness	Light
BnERF-19	GT1-motif	GGTTAA	1451	6	-	Arabidopsis thaliana	light responsive element	light responsiveness	Light
BnERF-19	GT1-motif	GGTTAA	1698	6	-	Arabidopsis thaliana	light responsive element	light responsiveness	Light
BnERF-2	Sp1	GGGCGG	791	6	-	Oryza sativa	light responsive element	light responsiveness	Light
BnERF-22	GT1-motif	GGTTAAT	939	7	+	Avena sativa	light responsive element	light responsiveness	Light
BnERF-23	GT1-motif	GGTTAAT	203	7	+	Avena sativa	light responsive element	light responsiveness	Light
BnERF-27	GT1-motif	GGTTAAT	1521	7	+	Avena sativa	light responsive element	light responsiveness	Light
BnERF-27	GT1-motif	GGTTAAT	1732	7	+	Avena sativa	light responsive element	light responsiveness	Light
BnERF-30	GT1-motif	GGTTAA	362	6	+	Arabidopsis thaliana	light responsive element	light responsiveness	Light
BnERF-30	GT1-motif	GGTTAAT	882	7	-	Avena sativa	light responsive element	light responsiveness	Light
BnERF-30	GT1-motif	GGTTAA	883	6	-	Arabidopsis thaliana	light responsive element	light responsiveness	Light
BnERF-32	Sp1	GGGCGG	834	6	-	Oryza sativa	light responsive element	light responsiveness	Light
BnERF-32	GT1-motif	GGTTAA	442	6	+	Arabidopsis thaliana	light responsive element	light responsiveness	Light
BnERF-33	GT1-motif	GGTTAA	117	6	-	Arabidopsis thaliana	light responsive element	light responsiveness	Light
BnERF-33	GT1-motif	GGTTAAT	333	7	-	Avena sativa	light responsive element	light responsiveness	Light
BnERF-33	GT1-motif	GGTTAA	334	6	-	Arabidopsis thaliana	light responsive element	light responsiveness	Light
BnERF-34	GT1-motif	GGTTAA	1203	6	-	Arabidopsis thaliana	light responsive element	light responsiveness	Light
BnERF-34	GT1-motif	GGTTAA	1350	6	-	Arabidopsis thaliana	light responsive element	light responsiveness	Light
BnERF-35	GT1-motif	GGTTAA	198	6	-	Arabidopsis thaliana	light responsive element	light responsiveness	Light
BnERF-36	GT1-motif	GGTTAA	206	6	-	Arabidopsis thaliana	light responsive element	light responsiveness	Light
BnERF-37	GT1-motif	GGTTAA	220	6	-	Arabidopsis thaliana	light responsive element	light responsiveness	Light
BnERF-37	Sp1	GGGCGG	1719	6	+	Oryza sativa	light responsive element	light responsiveness	Light
BnERF-38	GT1-motif	GGTTAA	1103	6	-	Arabidopsis thaliana	light responsive element	light responsiveness	Light
BnERF-38	Sp1	GGGCGG	1728	6	-	Oryza sativa	light responsive element	light responsiveness	Light
BnERF-40	GT1-motif	GGTTAA	1164	6	-	Arabidopsis thaliana	light responsive element	light responsiveness	Light
BnERF-41	GT1-motif	GGTTAA	1751	6	-	Arabidopsis thaliana	light responsive element	light responsiveness	Light
BnERF-41	Sp1	GGGCGG	861	6	-	Oryza sativa	light responsive element	light responsiveness	Light
BnERF-6	GT1-motif	GGTTAA	1682	6	-	Arabidopsis thaliana	light responsive element	light responsiveness	Light
BnERF-8	GT1-motif	GGTTAA	1523	6	+	Arabidopsis thaliana	light responsive element	light responsiveness	Light
BnERF-8	GT1-motif	GGTTAA	1780	6	-	Arabidopsis thaliana	light responsive element	light responsiveness	Light
BnRAV-2	GT1-motif	GGTTAAT	391	7	+	Avena sativa	light responsive element	light responsiveness	Light
BnRAV-2	GT1-motif	GGTTAAT	468	7	+	Avena sativa	light responsive element	light responsiveness	Light
BnRAV-2	GT1-motif	GGTTAAT	1307	7	+	Avena sativa	light responsive element	light responsiveness	Light
BnRAV-2	GT1-motif	GGTTAA	1817	6	-	Arabidopsis thaliana	light responsive element	light responsiveness	Light
BnRAV-2	3-AF1 binding site	TAAGAGAGGAA	1802	10	-	Solanum tuberosum	light responsive element	light responsiveness	Light
BnRAV-3	GT1-motif	GGTTAAT	1354	7	-	Avena sativa	light responsive element	light responsiveness	Light
BnRAV-3	GT1-motif	GGTTAA	1355	6	-	Arabidopsis thaliana	light responsive element	light responsiveness	Light
BnRAV-3	GT1-motif	GGTTAA	1684	6	+	Arabidopsis thaliana	light responsive element	light responsiveness	Light
BnAP2-1	Box 4	ATTAAT	102	6	+	Petroselinum crispum	part of a conserved DNA module involved in light responsiveness	light responsiveness	Light
BnAP2-1	Box 4	ATTAAT	123	6	+	Petroselinum crispum	part of a conserved DNA module involved in light responsiveness	light responsiveness	Light
BnAP2-1	Box 4	ATTAAT	519	6	+	Petroselinum crispum	part of a conserved DNA module involved in light responsiveness	light responsiveness	Light
BnAP2-1	I-box	TGATAATGT	280	9	+	Solanum tuberosum	part of a light responsive element	light responsiveness	Light
BnAP2-1	TCT-motif	TCTTAC	318	6	+	Arabidopsis thaliana	part of a light responsive element	light responsiveness	Light
BnAP2-1	TCT-motif	TCTTAC	1873	6	+	Arabidopsis thaliana	part of a light responsive element	light responsiveness	Light
BnAP2-1	TCT-motif	TCTTAC	1880	6	+	Arabidopsis thaliana	part of a light responsive element	light responsiveness	Light
BnAP2-1	chs-CMA1a	TTACTTAA	1104	8	+	Daucus carota	part of a light responsive element	light responsiveness	Light
BnAP2-10	MRE	AACCTAA	1702	7	-	Petroselinum crispum	MYB binding site involved in light responsiveness	light responsiveness	Light
BnAP2-10	Box 4	ATTAAT	9	6	+	Petroselinum crispum	part of a conserved DNA module involved in light responsiveness	light responsiveness	Light
BnAP2-10	Box 4	ATTAAT	460	6	+	Petroselinum crispum	part of a conserved DNA module involved in light responsiveness	light responsiveness	Light
BnAP2-10	Box 4	ATTAAT	748	6	+	Petroselinum crispum	part of a conserved DNA module involved in light responsiveness	light responsiveness	Light
BnAP2-10	Box 4	ATTAAT	801	6	+	Petroselinum crispum	part of a conserved DNA module involved in light responsiveness	light responsiveness	Light
BnAP2-10	Box 4	ATTAAT	1050	6	-	Petroselinum crispum	part of a conserved DNA module involved in light responsiveness	light responsiveness	Light
BnAP2-10	Box 4	ATTAAT	1239	6	-	Petroselinum crispum	part of a conserved DNA module involved in light responsiveness	light responsiveness	Light
BnAP2-10	GATA-motif	AAGATAAGATT	768	10	+	Arabidopsis thaliana	part of a light responsive element	light responsiveness	Light
BnAP2-10	TCT-motif	TCTTAC	1173	6	-	Arabidopsis thaliana	part of a light responsive element	light responsiveness	Light
BnAP2-10	AT1-motif	AATTATTTTTTATT	283	14	+	Solanum tuberosum	part of a light responsive module	light responsiveness	Light
BnAP2-11	Box 4	ATTAAT	1086	6	-	Petroselinum crispum	part of a conserved DNA module involved in light responsiveness	light responsiveness	Light
BnAP2-11	Box 4	ATTAAT	1595	6	-	Petroselinum crispum	part of a conserved DNA module involved in light responsiveness	light responsiveness	Light
BnAP2-11	Box 4	ATTAAT	1648	6	-	Petroselinum crispum	part of a conserved DNA module involved in light responsiveness	light responsiveness	Light
BnAP2-11	Box 4	ATTAAT	1800	6	-	Petroselinum crispum	part of a conserved DNA module involved in light responsiveness	light responsiveness	Light
BnAP2-11	Box 4	ATTAAT	1819	6	-	Petroselinum crispum	part of a conserved DNA module involved in light responsiveness	light responsiveness	Light
BnAP2-11	Box 4	ATTAAT	1918	6	-	Petroselinum crispum	part of a conserved DNA module involved in light responsiveness	light responsiveness	Light
BnAP2-11	Box 4	ATTAAT	1974	6	-	Petroselinum crispum	part of a conserved DNA module involved in light responsiveness	light responsiveness	Light
BnAP2-11	Box 4	ATTAAT	1984	6	-	Petroselinum crispum	part of a conserved DNA module involved in light responsiveness	light responsiveness	Light
BnAP2-11	TCT-motif	TCTTAC	265	6	-	Arabidopsis thaliana	part of a light responsive element	light responsiveness	Light
BnAP2-11	TCT-motif	TCTTAC	275	6	+	Arabidopsis thaliana	part of a light responsive element	light responsiveness	Light
BnAP2-11	TCT-motif	TCTTAC	349	6	+	Arabidopsis thaliana	part of a light responsive element	light responsiveness	Light
BnAP2-11	TCT-motif	TCTTAC	866	6	-	Arabidopsis thaliana	part of a light responsive element	light responsiveness	Light
BnAP2-11	TCT-motif	TCTTAC	925	6	+	Arabidopsis thaliana	part of a light responsive element	light responsiveness	Light
BnAP2-11	GATA-motif	GATAGGG	1840	7	-	Pisum sativum	part of a light responsive element	light responsiveness	Light
BnAP2-12	MRE	AACCTAA	696	7	-	Petroselinum crispum	MYB binding site involved in light responsiveness	light responsiveness	Light
BnAP2-12	MRE	AACCTAA	1508	7	-	Petroselinum crispum	MYB binding site involved in light responsiveness	light responsiveness	Light
BnAP2-12	MRE	AACCTAA	1863	7	+	Petroselinum crispum	MYB binding site involved in light responsiveness	light responsiveness	Light
BnAP2-12	Box 4	ATTAAT	302	6	+	Petroselinum crispum	part of a conserved DNA module involved in light responsiveness	light responsiveness	Light
BnAP2-12	Box 4	ATTAAT	449	6	+	Petroselinum crispum	part of a conserved DNA module involved in light responsiveness	light responsiveness	Light
BnAP2-12	Box 4	ATTAAT	1463	6	-	Petroselinum crispum	part of a conserved DNA module involved in light responsiveness	light responsiveness	Light
BnAP2-12	GATA-motif	GATAGGG	40	7	-	Pisum sativum	part of a light responsive element	light responsiveness	Light
BnAP2-12	GATA-motif	GATAGGA	1496	7	+	Arabidopsis thaliana	part of a light responsive element	light responsiveness	Light
BnAP2-12	AE-box	AGAAACAA	1795	8	+	Arabidopsis thaliana	part of a module for light response	light responsiveness	Light
BnAP2-13	Box 4	ATTAAT	1254	6	-	Petroselinum crispum	part of a conserved DNA module involved in light responsiveness	light responsiveness	Light
BnAP2-13	TCCC-motif	TCTCCCT	1306	7	-	Spinacia oleracea	part of a light responsive element	light responsiveness	Light
BnAP2-13	TCCC-motif	TCTCCCT	1503	7	-	Spinacia oleracea	part of a light responsive element	light responsiveness	Light
BnAP2-13	TCT-motif	TCTTAC	1170	6	-	Arabidopsis thaliana	part of a light responsive element	light responsiveness	Light
BnAP2-13	AE-box	AGAAACAA	1952	8	+	Arabidopsis thaliana	part of a module for light response	light responsiveness	Light
BnAP2-14	Box 4	ATTAAT	8	6	+	Petroselinum crispum	part of a conserved DNA module involved in light responsiveness	light responsiveness	Light
BnAP2-14	Box 4	ATTAAT	249	6	+	Petroselinum crispum	part of a conserved DNA module involved in light responsiveness	light responsiveness	Light
BnAP2-14	Box 4	ATTAAT	970	6	+	Petroselinum crispum	part of a conserved DNA module involved in light responsiveness	light responsiveness	Light
BnAP2-15	MRE	AACCTAA	304	7	-	Petroselinum crispum	MYB binding site involved in light responsiveness	light responsiveness	Light
BnAP2-15	Box 4	ATTAAT	324	6	+	Petroselinum crispum	part of a conserved DNA module involved in light responsiveness	light responsiveness	Light
BnAP2-15	TCT-motif	TCTTAC	1459	6	-	Arabidopsis thaliana	part of a light responsive element	light responsiveness	Light
BnAP2-16	Box 4	ATTAAT	1076	6	-	Petroselinum crispum	part of a conserved DNA module involved in light responsiveness	light responsiveness	Light
BnAP2-16	GATA-motif	GATAGGA	90	7	+	Arabidopsis thaliana	part of a light responsive element	light responsiveness	Light
BnAP2-16	GATA-motif	AAGGATAAGG	716	9	+	Solanum tuberosum	part of a light responsive element	light responsiveness	Light
BnAP2-16	I-box	atGATAAGGTC	291	10	+	Helianthus annuus	part of a light responsive element	light responsiveness	Light
BnAP2-16	chs-CMA1a	TTACTTAA	1192	8	-	Daucus carota	part of a light responsive element	light responsiveness	Light
BnAP2-16	AT1-motif	AATTATTTTTTATT	399	13	+	Solanum tuberosum	part of a light responsive module	light responsiveness	Light
BnAP2-16	AE-box	AGAAACAA	1521	8	-	Arabidopsis thaliana	part of a module for light response	light responsiveness	Light
BnAP2-17	MRE	AACCTAA	539	7	+	Petroselinum crispum	MYB binding site involved in light responsiveness	light responsiveness	Light
BnAP2-17	MRE	AACCTAA	1748	7	-	Petroselinum crispum	MYB binding site involved in light responsiveness	light responsiveness	Light
BnAP2-17	ATCT-motif	AATCTAATCC	1519	9	-	Pisum sativum	part of a conserved DNA module involved in light responsiveness	light responsiveness	Light
BnAP2-17	ATCT-motif	AATCTAATCC	1685	9	-	Pisum sativum	part of a conserved DNA module involved in light responsiveness	light responsiveness	Light
BnAP2-17	Box 4	ATTAAT	1414	6	-	Petroselinum crispum	part of a conserved DNA module involved in light responsiveness	light responsiveness	Light
BnAP2-18	Box 4	ATTAAT	141	6	+	Petroselinum crispum	part of a conserved DNA module involved in light responsiveness	light responsiveness	Light
BnAP2-18	Box 4	ATTAAT	454	6	+	Petroselinum crispum	part of a conserved DNA module involved in light responsiveness	light responsiveness	Light
BnAP2-18	Box 4	ATTAAT	466	6	+	Petroselinum crispum	part of a conserved DNA module involved in light responsiveness	light responsiveness	Light
BnAP2-18	Box 4	ATTAAT	1672	6	-	Petroselinum crispum	part of a conserved DNA module involved in light responsiveness	light responsiveness	Light
BnAP2-18	TCT-motif	TCTTAC	84	6	-	Arabidopsis thaliana	part of a light responsive element	light responsiveness	Light
BnAP2-18	Gap-box	CAAATGAA(A/G)A	1174	9.5	+	Arabidopsis thaliana	part of a light responsive element	light responsiveness	Light
BnAP2-18	GATA-motif	AAGGATAAGG	1248	9	+	Solanum tuberosum	part of a light responsive element	light responsiveness	Light
BnAP2-2	Box 4	ATTAAT	331	6	+	Petroselinum crispum	part of a conserved DNA module involved in light responsiveness	light responsiveness	Light
BnAP2-2	Box 4	ATTAAT	543	6	+	Petroselinum crispum	part of a conserved DNA module involved in light responsiveness	light responsiveness	Light
BnAP2-2	Box 4	ATTAAT	677	6	+	Petroselinum crispum	part of a conserved DNA module involved in light responsiveness	light responsiveness	Light
BnAP2-2	Box 4	ATTAAT	928	6	+	Petroselinum crispum	part of a conserved DNA module involved in light responsiveness	light responsiveness	Light
BnAP2-2	Box 4	ATTAAT	957	6	+	Petroselinum crispum	part of a conserved DNA module involved in light responsiveness	light responsiveness	Light
BnAP2-2	Box 4	ATTAAT	961	6	+	Petroselinum crispum	part of a conserved DNA module involved in light responsiveness	light responsiveness	Light
BnAP2-2	Box 4	ATTAAT	1995	6	-	Petroselinum crispum	part of a conserved DNA module involved in light responsiveness	light responsiveness	Light
BnAP2-2	TCT-motif	TCTTAC	1660	6	-	Arabidopsis thaliana	part of a light responsive element	light responsiveness	Light
BnAP2-3	Box 4	ATTAAT	72	6	+	Petroselinum crispum	part of a conserved DNA module involved in light responsiveness	light responsiveness	Light
BnAP2-3	Box 4	ATTAAT	298	6	+	Petroselinum crispum	part of a conserved DNA module involved in light responsiveness	light responsiveness	Light
BnAP2-3	Box 4	ATTAAT	683	6	+	Petroselinum crispum	part of a conserved DNA module involved in light responsiveness	light responsiveness	Light
BnAP2-3	Box 4	ATTAAT	714	6	+	Petroselinum crispum	part of a conserved DNA module involved in light responsiveness	light responsiveness	Light
BnAP2-3	Box 4	ATTAAT	734	6	+	Petroselinum crispum	part of a conserved DNA module involved in light responsiveness	light responsiveness	Light
BnAP2-3	Box 4	ATTAAT	922	6	+	Petroselinum crispum	part of a conserved DNA module involved in light responsiveness	light responsiveness	Light
BnAP2-3	ATCT-motif	AATCTAATCC	862	9	-	Pisum sativum	part of a conserved DNA module involved in light responsiveness	light responsiveness	Light
BnAP2-3	TCT-motif	TCTTAC	590	6	-	Arabidopsis thaliana	part of a light responsive element	light responsiveness	Light
BnAP2-3	Gap-box	CAAATGAA(A/G)A	111	9	-	Arabidopsis thaliana	part of a light responsive element	light responsiveness	Light
BnAP2-3	TCCC-motif	TCTCCCT	1789	7	-	Spinacia oleracea	part of a light responsive element	light responsiveness	Light
BnAP2-3	GATA-motif	GATAGGA	1357	7	+	Arabidopsis thaliana	part of a light responsive element	light responsiveness	Light
BnAP2-3	AT1-motif	AATTATTTTTTATT	328	13	+	Solanum tuberosum	part of a light responsive module	light responsiveness	Light
BnAP2-4	ATC-motif	AGTAATCT	978	8	-	Spinacia oleracea	part of a conserved DNA module involved in light responsiveness	light responsiveness	Light
BnAP2-4	Box 4	ATTAAT	1057	6	-	Petroselinum crispum	part of a conserved DNA module involved in light responsiveness	light responsiveness	Light
BnAP2-4	Box 4	ATTAAT	1068	6	-	Petroselinum crispum	part of a conserved DNA module involved in light responsiveness	light responsiveness	Light
BnAP2-4	Box 4	ATTAAT	1301	6	-	Petroselinum crispum	part of a conserved DNA module involved in light responsiveness	light responsiveness	Light
BnAP2-4	GATA-motif	AAGGATAAGG	582	9	-	Solanum tuberosum	part of a light responsive element	light responsiveness	Light
BnAP2-4	GATA-motif	GATAGGG	659	7	-	Pisum sativum	part of a light responsive element	light responsiveness	Light
BnAP2-4	TCT-motif	TCTTAC	1215	6	-	Arabidopsis thaliana	part of a light responsive element	light responsiveness	Light
BnAP2-5	MRE	AACCTAA	1810	7	-	Petroselinum crispum	MYB binding site involved in light responsiveness	light responsiveness	Light
BnAP2-5	Box 4	ATTAAT	1540	6	-	Petroselinum crispum	part of a conserved DNA module involved in light responsiveness	light responsiveness	Light
BnAP2-5	TCT-motif	TCTTAC	825	6	-	Arabidopsis thaliana	part of a light responsive element	light responsiveness	Light
BnAP2-5	I-box	gGATAAGGTG	14	9	+	Zea mays	part of a light responsive element	light responsiveness	Light
BnAP2-5	I-box	AGATAAGG	674	8	-	Triticum aestivum	part of a light responsive element	light responsiveness	Light
BnAP2-5	TCCC-motif	TCTCCCT	1157	7	-	Spinacia oleracea	part of a light responsive element	light responsiveness	Light
BnAP2-5	GATA-motif	AAGGATAAGG	674	9	-	Solanum tuberosum	part of a light responsive element	light responsiveness	Light
BnAP2-5	AE-box	AGAAACAA	1329	8	-	Arabidopsis thaliana	part of a module for light response	light responsiveness	Light
BnAP2-6	MRE	AACCTAA	1810	7	-	Petroselinum crispum	MYB binding site involved in light responsiveness	light responsiveness	Light
BnAP2-6	Box 4	ATTAAT	1540	6	-	Petroselinum crispum	part of a conserved DNA module involved in light responsiveness	light responsiveness	Light
BnAP2-6	I-box	gGATAAGGTG	14	9	+	Zea mays	part of a light responsive element	light responsiveness	Light
BnAP2-6	I-box	AGATAAGG	674	8	-	Triticum aestivum	part of a light responsive element	light responsiveness	Light
BnAP2-6	TCT-motif	TCTTAC	825	6	-	Arabidopsis thaliana	part of a light responsive element	light responsiveness	Light
BnAP2-6	GATA-motif	AAGGATAAGG	674	9	-	Solanum tuberosum	part of a light responsive element	light responsiveness	Light
BnAP2-6	TCCC-motif	TCTCCCT	1157	7	-	Spinacia oleracea	part of a light responsive element	light responsiveness	Light
BnAP2-6	AE-box	AGAAACAA	1329	8	-	Arabidopsis thaliana	part of a module for light response	light responsiveness	Light
BnAP2-7	MRE	AACCTAA	1946	7	-	Petroselinum crispum	MYB binding site involved in light responsiveness	light responsiveness	Light
BnAP2-7	Box 4	ATTAAT	1261	6	-	Petroselinum crispum	part of a conserved DNA module involved in light responsiveness	light responsiveness	Light
BnAP2-7	TCT-motif	TCTTAC	277	6	+	Arabidopsis thaliana	part of a light responsive element	light responsiveness	Light
BnAP2-7	AE-box	AGAAACTT	1134	8	-	Arabidopsis thaliana	part of a module for light response	light responsiveness	Light
BnAP2-7	AE-box	AGAAACTT	1615	8	-	Arabidopsis thaliana	part of a module for light response	light responsiveness	Light
BnAP2-8	Box 4	ATTAAT	144	6	+	Petroselinum crispum	part of a conserved DNA module involved in light responsiveness	light responsiveness	Light
BnAP2-8	Box 4	ATTAAT	1168	6	-	Petroselinum crispum	part of a conserved DNA module involved in light responsiveness	light responsiveness	Light
BnAP2-8	ATCT-motif	AATCTAATCC	1529	9	-	Pisum sativum	part of a conserved DNA module involved in light responsiveness	light responsiveness	Light
BnAP2-8	chs-CMA1a	TTACTTAA	557	8	-	Daucus carota	part of a light responsive element	light responsiveness	Light
BnAP2-8	TCT-motif	TCTTAC	985	6	-	Arabidopsis thaliana	part of a light responsive element	light responsiveness	Light
BnAP2-9	Box 4	ATTAAT	309	6	+	Petroselinum crispum	part of a conserved DNA module involved in light responsiveness	light responsiveness	Light
BnAP2-9	Box 4	ATTAAT	313	6	+	Petroselinum crispum	part of a conserved DNA module involved in light responsiveness	light responsiveness	Light
BnAP2-9	Box 4	ATTAAT	392	6	+	Petroselinum crispum	part of a conserved DNA module involved in light responsiveness	light responsiveness	Light
BnAP2-9	Box 4	ATTAAT	448	6	+	Petroselinum crispum	part of a conserved DNA module involved in light responsiveness	light responsiveness	Light
BnAP2-9	Box 4	ATTAAT	780	6	+	Petroselinum crispum	part of a conserved DNA module involved in light responsiveness	light responsiveness	Light
BnAP2-9	Box 4	ATTAAT	941	6	+	Petroselinum crispum	part of a conserved DNA module involved in light responsiveness	light responsiveness	Light
BnAP2-9	Box 4	ATTAAT	1591	6	-	Petroselinum crispum	part of a conserved DNA module involved in light responsiveness	light responsiveness	Light
BnAP2-9	Box 4	ATTAAT	1983	6	-	Petroselinum crispum	part of a conserved DNA module involved in light responsiveness	light responsiveness	Light
BnAP2-9	GATA-motif	AAGGATAAGG	188	9	+	Solanum tuberosum	part of a light responsive element	light responsiveness	Light
BnAP2-9	I-box	ccttatcct	189	9	-	Arabidopsis thaliana	part of a light responsive element	light responsiveness	Light
BnAP2-9	I-box	gGATAAGGTG	190	10	+	Zea mays	part of a light responsive element	light responsiveness	Light
BnDREB-1	Box 4	ATTAAT	823	6	+	Petroselinum crispum	part of a conserved DNA module involved in light responsiveness	light responsiveness	Light
BnDREB-1	I-box	AAGATAAGGCT	1597	10	-	Gossypium hirsutum	part of a light responsive element	light responsiveness	Light
BnDREB-10	Box 4	ATTAAT	330	6	+	Petroselinum crispum	part of a conserved DNA module involved in light responsiveness	light responsiveness	Light
BnDREB-10	Box 4	ATTAAT	513	6	+	Petroselinum crispum	part of a conserved DNA module involved in light responsiveness	light responsiveness	Light
BnDREB-10	Box 4	ATTAAT	778	6	+	Petroselinum crispum	part of a conserved DNA module involved in light responsiveness	light responsiveness	Light
BnDREB-10	Gap-box	CAAATGAA(A/G)A	1341	9.5	-	Arabidopsis thaliana	part of a light responsive element	light responsiveness	Light
BnDREB-10	chs-CMA1a	TTACTTAA	1709	8	+	Daucus carota	part of a light responsive element	light responsiveness	Light
BnDREB-11	GATA-motif	GATAGGA	232	7	+	Arabidopsis thaliana	part of a light responsive element	light responsiveness	Light
BnDREB-11	GATA-motif	AAGGATAAGG	540	9	+	Solanum tuberosum	part of a light responsive element	light responsiveness	Light
BnDREB-11	AE-box	AGAAACTT	475	8	-	Arabidopsis thaliana	part of a module for light response	light responsiveness	Light
BnDREB-12	MRE	AACCTAA	1228	7	+	Petroselinum crispum	MYB binding site involved in light responsiveness	light responsiveness	Light
BnDREB-12	Box 4	ATTAAT	615	6	+	Petroselinum crispum	part of a conserved DNA module involved in light responsiveness	light responsiveness	Light
BnDREB-12	TCT-motif	TCTTAC	271	6	-	Arabidopsis thaliana	part of a light responsive element	light responsiveness	Light
BnDREB-12	TCT-motif	TCTTAC	359	6	+	Arabidopsis thaliana	part of a light responsive element	light responsiveness	Light
BnDREB-12	TCT-motif	TCTTAC	1288	6	-	Arabidopsis thaliana	part of a light responsive element	light responsiveness	Light
BnDREB-12	TCT-motif	TCTTAC	1346	6	+	Arabidopsis thaliana	part of a light responsive element	light responsiveness	Light
BnDREB-12	chs-CMA1a	TTACTTAA	398	8	+	Daucus carota	part of a light responsive element	light responsiveness	Light
BnDREB-12	AE-box	AGAAACAA	328	8	-	Arabidopsis thaliana	part of a module for light response	light responsiveness	Light
BnDREB-12	AE-box	AGAAACTT	1514	8	+	Arabidopsis thaliana	part of a module for light response	light responsiveness	Light
BnDREB-13	MRE	AACCTAA	374	7	+	Petroselinum crispum	MYB binding site involved in light responsiveness	light responsiveness	Light
BnDREB-13	Box 4	ATTAAT	5	6	+	Petroselinum crispum	part of a conserved DNA module involved in light responsiveness	light responsiveness	Light
BnDREB-13	Box 4	ATTAAT	1011	6	-	Petroselinum crispum	part of a conserved DNA module involved in light responsiveness	light responsiveness	Light
BnDREB-13	Box 4	ATTAAT	1015	6	-	Petroselinum crispum	part of a conserved DNA module involved in light responsiveness	light responsiveness	Light
BnDREB-13	Box 4	ATTAAT	1019	6	-	Petroselinum crispum	part of a conserved DNA module involved in light responsiveness	light responsiveness	Light
BnDREB-13	Box 4	ATTAAT	1175	6	-	Petroselinum crispum	part of a conserved DNA module involved in light responsiveness	light responsiveness	Light
BnDREB-13	GTGGC-motif	CATCGTGTGGC	1622	10	-	Arabidopsis thaliana	part of a light responsive element	light responsiveness	Light
BnDREB-13	TCCC-motif	TCTCCCT	193	7	+	Spinacia oleracea	part of a light responsive element	light responsiveness	Light
BnDREB-13	GA-motif	ATAGATAA	569	8	-	Arabidopsis thaliana	part of a light responsive element	light responsiveness	Light
BnDREB-14	Box 4	ATTAAT	142	6	+	Petroselinum crispum	part of a conserved DNA module involved in light responsiveness	light responsiveness	Light
BnDREB-14	Box 4	ATTAAT	705	6	+	Petroselinum crispum	part of a conserved DNA module involved in light responsiveness	light responsiveness	Light
BnDREB-14	Box 4	ATTAAT	922	6	+	Petroselinum crispum	part of a conserved DNA module involved in light responsiveness	light responsiveness	Light
BnDREB-14	Box 4	ATTAAT	1017	6	-	Petroselinum crispum	part of a conserved DNA module involved in light responsiveness	light responsiveness	Light
BnDREB-14	ATCT-motif	AATCTAATCC	865	9	-	Pisum sativum	part of a conserved DNA module involved in light responsiveness	light responsiveness	Light
BnDREB-14	TCT-motif	TCTTAC	1923	6	-	Arabidopsis thaliana	part of a light responsive element	light responsiveness	Light
BnDREB-14	chs-Unit 1 m1	ACCTAACCCGC	49	10	+	Hordeum vulgare	part of a light responsive element	light responsiveness	Light
BnDREB-14	GATA-motif	AAGGATAAGG	249	9	+	Solanum tuberosum	part of a light responsive element	light responsiveness	Light
BnDREB-14	GATA-motif	GATAGGG	252	7	+	Pisum sativum	part of a light responsive element	light responsiveness	Light
BnDREB-14	AE-box	AGAAACAA	1808	8	-	Arabidopsis thaliana	part of a module for light response	light responsiveness	Light
BnDREB-14	AE-box	AGAAACAA	1817	8	-	Arabidopsis thaliana	part of a module for light response	light responsiveness	Light
BnDREB-14	AE-box	AGAAACAA	1993	8	+	Arabidopsis thaliana	part of a module for light response	light responsiveness	Light
BnDREB-15	MRE	AACCTAA	473	7	+	Petroselinum crispum	MYB binding site involved in light responsiveness	light responsiveness	Light
BnDREB-15	GATA-motif	AAGGATAAGG	488	9	+	Solanum tuberosum	part of a light responsive element	light responsiveness	Light
BnDREB-15	GATA-motif	GATAGGG	1477	7	-	Pisum sativum	part of a light responsive element	light responsiveness	Light
BnDREB-15	TCT-motif	TCTTAC	691	6	-	Arabidopsis thaliana	part of a light responsive element	light responsiveness	Light
BnDREB-15	TCT-motif	TCTTAC	1886	6	+	Arabidopsis thaliana	part of a light responsive element	light responsiveness	Light
BnDREB-15	AE-box	AGAAACAA	467	8	+	Arabidopsis thaliana	part of a module for light response	light responsiveness	Light
BnDREB-15	AE-box	AGAAACTT	1861	8	-	Arabidopsis thaliana	part of a module for light response	light responsiveness	Light
BnDREB-16	MRE	AACCTAA	1097	7	-	Petroselinum crispum	MYB binding site involved in light responsiveness	light responsiveness	Light
BnDREB-16	Box 4	ATTAAT	757	6	+	Petroselinum crispum	part of a conserved DNA module involved in light responsiveness	light responsiveness	Light
BnDREB-16	Box 4	ATTAAT	836	6	+	Petroselinum crispum	part of a conserved DNA module involved in light responsiveness	light responsiveness	Light
BnDREB-16	Box 4	ATTAAT	873	6	+	Petroselinum crispum	part of a conserved DNA module involved in light responsiveness	light responsiveness	Light
BnDREB-16	LAMP-element	CTTTATCA	1764	8	+	Pisum sativum	part of a light responsive element	light responsiveness	Light
BnDREB-16	TCCC-motif	TCTCCCT	510	7	-	Spinacia oleracea	part of a light responsive element	light responsiveness	Light
BnDREB-16	TCCC-motif	TCTCCCT	1899	7	+	Spinacia oleracea	part of a light responsive element	light responsiveness	Light
BnDREB-16	TCCC-motif	TCTCCCT	1909	7	+	Spinacia oleracea	part of a light responsive element	light responsiveness	Light
BnDREB-16	TCCC-motif	TCTCCCT	1920	7	+	Spinacia oleracea	part of a light responsive element	light responsiveness	Light
BnDREB-16	TCCC-motif	TCTCCCT	1928	7	+	Spinacia oleracea	part of a light responsive element	light responsiveness	Light
BnDREB-17	Box 4	ATTAAT	984	6	+	Petroselinum crispum	part of a conserved DNA module involved in light responsiveness	light responsiveness	Light
BnDREB-17	TCCC-motif	TCTCCCT	438	7	-	Spinacia oleracea	part of a light responsive element	light responsiveness	Light
BnDREB-17	GATA-motif	AAGATAAGATT	1104	10	+	Arabidopsis thaliana	part of a light responsive element	light responsiveness	Light
BnDREB-17	GATA-motif	AAGGATAAGG	1865	9	-	Solanum tuberosum	part of a light responsive element	light responsiveness	Light
BnDREB-17	TCT-motif	TCTTAC	1984	6	-	Arabidopsis thaliana	part of a light responsive element	light responsiveness	Light
BnDREB-18	Box 4	ATTAAT	1190	6	-	Petroselinum crispum	part of a conserved DNA module involved in light responsiveness	light responsiveness	Light
BnDREB-18	TCT-motif	TCTTAC	410	6	+	Arabidopsis thaliana	part of a light responsive element	light responsiveness	Light
BnDREB-18	TCT-motif	TCTTAC	1370	6	+	Arabidopsis thaliana	part of a light responsive element	light responsiveness	Light
BnDREB-18	chs-CMA2a	TCACTTGA	915	8	+	Petroselinum crispum	part of a light responsive element	light responsiveness	Light
BnDREB-19	MRE	AACCTAA	205	7	+	Petroselinum crispum	MYB binding site involved in light responsiveness	light responsiveness	Light
BnDREB-19	Box 4	ATTAAT	858	6	+	Petroselinum crispum	part of a conserved DNA module involved in light responsiveness	light responsiveness	Light
BnDREB-19	Box 4	ATTAAT	1140	6	-	Petroselinum crispum	part of a conserved DNA module involved in light responsiveness	light responsiveness	Light
BnDREB-19	Gap-box	CAAATGAA(A/G)A	1685	9	+	Arabidopsis thaliana	part of a light responsive element	light responsiveness	Light
BnDREB-19	Box II	TGGTAATAA	1488	9	-	Solanum tuberosum	part of a light responsive element	light responsiveness	Light
BnDREB-19	TCT-motif	TCTTAC	637	6	-	Arabidopsis thaliana	part of a light responsive element	light responsiveness	Light
BnDREB-19	TCT-motif	TCTTAC	1003	6	+	Arabidopsis thaliana	part of a light responsive element	light responsiveness	Light
BnDREB-19	TCCC-motif	TCTCCCT	956	7	-	Spinacia oleracea	part of a light responsive element	light responsiveness	Light
BnDREB-19	TCCC-motif	TCTCCCT	966	7	+	Spinacia oleracea	part of a light responsive element	light responsiveness	Light
BnDREB-19	TCCC-motif	TCTCCCT	980	7	+	Spinacia oleracea	part of a light responsive element	light responsiveness	Light
BnDREB-19	TCCC-motif	TCTCCCT	1028	7	+	Spinacia oleracea	part of a light responsive element	light responsiveness	Light
BnDREB-19	GATA-motif	GATAGGA	779	7	+	Arabidopsis thaliana	part of a light responsive element	light responsiveness	Light
BnDREB-19	AE-box	AGAAACAA	448	8	-	Arabidopsis thaliana	part of a module for light response	light responsiveness	Light
BnDREB-2	MRE	AACCTAA	1620	7	+	Petroselinum crispum	MYB binding site involved in light responsiveness	light responsiveness	Light
BnDREB-2	Box 4	ATTAAT	1264	6	-	Petroselinum crispum	part of a conserved DNA module involved in light responsiveness	light responsiveness	Light
BnDREB-2	Box 4	ATTAAT	1629	6	-	Petroselinum crispum	part of a conserved DNA module involved in light responsiveness	light responsiveness	Light
BnDREB-2	chs-CMA2a	TCACTTGA	991	8	-	Petroselinum crispum	part of a light responsive element	light responsiveness	Light
BnDREB-2	GA-motif	ATAGATAA	1133	8	-	Arabidopsis thaliana	part of a light responsive element	light responsiveness	Light
BnDREB-2	GATA-motif	AAGATAAGATT	1861	10	-	Arabidopsis thaliana	part of a light responsive element	light responsiveness	Light
BnDREB-2	TCCC-motif	TCTCCCT	1962	7	+	Spinacia oleracea	part of a light responsive element	light responsiveness	Light
BnDREB-20	MRE	AACCTAA	1573	7	+	Petroselinum crispum	MYB binding site involved in light responsiveness	light responsiveness	Light
BnDREB-20	MRE	AACCTAA	1579	7	+	Petroselinum crispum	MYB binding site involved in light responsiveness	light responsiveness	Light
BnDREB-20	MRE	AACCTAA	1610	7	+	Petroselinum crispum	MYB binding site involved in light responsiveness	light responsiveness	Light
BnDREB-20	ATCT-motif	AATCTAATCC	389	9	-	Pisum sativum	part of a conserved DNA module involved in light responsiveness	light responsiveness	Light
BnDREB-20	Box 4	ATTAAT	138	6	+	Petroselinum crispum	part of a conserved DNA module involved in light responsiveness	light responsiveness	Light
BnDREB-20	Box 4	ATTAAT	667	6	+	Petroselinum crispum	part of a conserved DNA module involved in light responsiveness	light responsiveness	Light
BnDREB-20	Box 4	ATTAAT	698	6	+	Petroselinum crispum	part of a conserved DNA module involved in light responsiveness	light responsiveness	Light
BnDREB-20	Box 4	ATTAAT	971	6	+	Petroselinum crispum	part of a conserved DNA module involved in light responsiveness	light responsiveness	Light
BnDREB-20	GA-motif	ATAGATAA	1225	8	-	Arabidopsis thaliana	part of a light responsive element	light responsiveness	Light
BnDREB-20	AT1-motif	AATTATTTTTTATT	39	13	-	Solanum tuberosum	part of a light responsive module	light responsiveness	Light
BnDREB-21	MRE	AACCTAA	1681	7	+	Petroselinum crispum	MYB binding site involved in light responsiveness	light responsiveness	Light
BnDREB-21	Box 4	ATTAAT	877	6	+	Petroselinum crispum	part of a conserved DNA module involved in light responsiveness	light responsiveness	Light
BnDREB-21	Box 4	ATTAAT	1403	6	-	Petroselinum crispum	part of a conserved DNA module involved in light responsiveness	light responsiveness	Light
BnDREB-21	Box 4	ATTAAT	1495	6	-	Petroselinum crispum	part of a conserved DNA module involved in light responsiveness	light responsiveness	Light
BnDREB-21	GA-motif	ATAGATAA	516	8	-	Arabidopsis thaliana	part of a light responsive element	light responsiveness	Light
BnDREB-21	GA-motif	ATAGATAA	543	8	-	Arabidopsis thaliana	part of a light responsive element	light responsiveness	Light
BnDREB-21	GA-motif	ATAGATAA	1017	8	+	Arabidopsis thaliana	part of a light responsive element	light responsiveness	Light
BnDREB-21	Box II	TGGTAATAA	423	9	-	Solanum tuberosum	part of a light responsive element	light responsiveness	Light
BnDREB-21	Box II	TGGTAATAA	1169	9	-	Solanum tuberosum	part of a light responsive element	light responsiveness	Light
BnDREB-21	I-box	TAGATAACC	541	9	-	Pisum sativum	part of a light responsive element	light responsiveness	Light
BnDREB-21	I-box	TAGATAACC	1018	9	+	Pisum sativum	part of a light responsive element	light responsiveness	Light
BnDREB-3	Box 4	ATTAAT	1028	6	-	Petroselinum crispum	part of a conserved DNA module involved in light responsiveness	light responsiveness	Light
BnDREB-3	Box 4	ATTAAT	1106	6	-	Petroselinum crispum	part of a conserved DNA module involved in light responsiveness	light responsiveness	Light
BnDREB-3	Box 4	ATTAAT	1188	6	-	Petroselinum crispum	part of a conserved DNA module involved in light responsiveness	light responsiveness	Light
BnDREB-3	Box 4	ATTAAT	1519	6	-	Petroselinum crispum	part of a conserved DNA module involved in light responsiveness	light responsiveness	Light
BnDREB-3	chs-CMA2a	TCACTTGA	1114	8	-	Petroselinum crispum	part of a light responsive element	light responsiveness	Light
BnDREB-3	GA-motif	ATAGATAA	1495	8	+	Arabidopsis thaliana	part of a light responsive element	light responsiveness	Light
BnDREB-3	I-box	gGATAAGGTG	242	9	+	Zea mays	part of a light responsive element	light responsiveness	Light
BnDREB-4	MRE	AACCTAA	1425	7	+	Petroselinum crispum	MYB binding site involved in light responsiveness	light responsiveness	Light
BnDREB-4	Box 4	ATTAAT	310	6	+	Petroselinum crispum	part of a conserved DNA module involved in light responsiveness	light responsiveness	Light
BnDREB-4	Box 4	ATTAAT	390	6	+	Petroselinum crispum	part of a conserved DNA module involved in light responsiveness	light responsiveness	Light
BnDREB-4	Box 4	ATTAAT	649	6	+	Petroselinum crispum	part of a conserved DNA module involved in light responsiveness	light responsiveness	Light
BnDREB-4	Box 4	ATTAAT	886	6	+	Petroselinum crispum	part of a conserved DNA module involved in light responsiveness	light responsiveness	Light
BnDREB-4	Box 4	ATTAAT	1223	6	-	Petroselinum crispum	part of a conserved DNA module involved in light responsiveness	light responsiveness	Light
BnDREB-4	Box 4	ATTAAT	1529	6	-	Petroselinum crispum	part of a conserved DNA module involved in light responsiveness	light responsiveness	Light
BnDREB-4	Box 4	ATTAAT	1987	6	-	Petroselinum crispum	part of a conserved DNA module involved in light responsiveness	light responsiveness	Light
BnDREB-4	chs-CMA2a	TCACTTGA	1764	8	+	Petroselinum crispum	part of a light responsive element	light responsiveness	Light
BnDREB-4	GA-motif	ATAGATAA	496	8	-	Arabidopsis thaliana	part of a light responsive element	light responsiveness	Light
BnDREB-5	MRE	AACCTAA	61	7	+	Petroselinum crispum	MYB binding site involved in light responsiveness	light responsiveness	Light
BnDREB-5	Box 4	ATTAAT	320	6	+	Petroselinum crispum	part of a conserved DNA module involved in light responsiveness	light responsiveness	Light
BnDREB-5	Box 4	ATTAAT	1107	6	-	Petroselinum crispum	part of a conserved DNA module involved in light responsiveness	light responsiveness	Light
BnDREB-5	TCT-motif	TCTTAC	482	6	+	Arabidopsis thaliana	part of a light responsive element	light responsiveness	Light
BnDREB-5	TCT-motif	TCTTAC	1331	6	-	Arabidopsis thaliana	part of a light responsive element	light responsiveness	Light
BnDREB-5	GA-motif	ATAGATAA	1276	8	+	Arabidopsis thaliana	part of a light responsive element	light responsiveness	Light
BnDREB-5	AE-box	AGAAACAA	99	8	+	Arabidopsis thaliana	part of a module for light response	light responsiveness	Light
BnDREB-6	Box 4	ATTAAT	139	6	+	Petroselinum crispum	part of a conserved DNA module involved in light responsiveness	light responsiveness	Light
BnDREB-6	Box 4	ATTAAT	1396	6	-	Petroselinum crispum	part of a conserved DNA module involved in light responsiveness	light responsiveness	Light
BnDREB-6	chs-CMA1a	TTACTTAA	27	8	+	Daucus carota	part of a light responsive element	light responsiveness	Light
BnDREB-6	TCT-motif	TCTTAC	990	6	+	Arabidopsis thaliana	part of a light responsive element	light responsiveness	Light
BnDREB-6	Box II	TGGTAATAA	405	9	-	Solanum tuberosum	part of a light responsive element	light responsiveness	Light
BnDREB-6	Box II	TGGTAATAA	513	9	+	Solanum tuberosum	part of a light responsive element	light responsiveness	Light
BnDREB-6	Box II	ACACGTTGT	1243	9	+	Sinapis alba	part of a light responsive element	light responsiveness	Light
BnDREB-6	TCCC-motif	TCTCCCT	1794	7	+	Spinacia oleracea	part of a light responsive element	light responsiveness	Light
BnDREB-7	MRE	AACCTAA	75	7	+	Petroselinum crispum	MYB binding site involved in light responsiveness	light responsiveness	Light
BnDREB-7	MRE	AACCTAA	215	7	+	Petroselinum crispum	MYB binding site involved in light responsiveness	light responsiveness	Light
BnDREB-7	Box 4	ATTAAT	779	6	+	Petroselinum crispum	part of a conserved DNA module involved in light responsiveness	light responsiveness	Light
BnDREB-7	Box 4	ATTAAT	871	6	+	Petroselinum crispum	part of a conserved DNA module involved in light responsiveness	light responsiveness	Light
BnDREB-7	Box 4	ATTAAT	1476	6	-	Petroselinum crispum	part of a conserved DNA module involved in light responsiveness	light responsiveness	Light
BnDREB-7	I-box	cCATATCCAAT	271	10	-	Flaveria trinervia	part of a light responsive element	light responsiveness	Light
BnDREB-8	Box 4	ATTAAT	641	6	+	Petroselinum crispum	part of a conserved DNA module involved in light responsiveness	light responsiveness	Light
BnDREB-8	LAMP-element	CTTTATCA	444	8	+	Pisum sativum	part of a light responsive element	light responsiveness	Light
BnDREB-8	GATA-motif	AAGGATAAGG	1898	9	-	Solanum tuberosum	part of a light responsive element	light responsiveness	Light
BnDREB-8	GA-motif	ATAGATAA	101	8	-	Arabidopsis thaliana	part of a light responsive element	light responsiveness	Light
BnDREB-8	TCT-motif	TCTTAC	212	6	-	Arabidopsis thaliana	part of a light responsive element	light responsiveness	Light
BnDREB-8	TCT-motif	TCTTAC	256	6	-	Arabidopsis thaliana	part of a light responsive element	light responsiveness	Light
BnDREB-8	chs-CMA1a	TTACTTAA	913	8	+	Daucus carota	part of a light responsive element	light responsiveness	Light
BnDREB-8	AE-box	AGAAACTT	889	8	-	Arabidopsis thaliana	part of a module for light response	light responsiveness	Light
BnDREB-9	Box 4	ATTAAT	814	6	+	Petroselinum crispum	part of a conserved DNA module involved in light responsiveness	light responsiveness	Light
BnDREB-9	Box 4	ATTAAT	937	6	+	Petroselinum crispum	part of a conserved DNA module involved in light responsiveness	light responsiveness	Light
BnDREB-9	Box 4	ATTAAT	1909	6	-	Petroselinum crispum	part of a conserved DNA module involved in light responsiveness	light responsiveness	Light
BnDREB-9	GATA-motif	AAGATAAGATT	1467	10	+	Arabidopsis thaliana	part of a light responsive element	light responsiveness	Light
BnERF-1	ATCT-motif	AATCTAATCC	117	9	+	Pisum sativum	part of a conserved DNA module involved in light responsiveness	light responsiveness	Light
BnERF-1	Box 4	ATTAAT	316	6	+	Petroselinum crispum	part of a conserved DNA module involved in light responsiveness	light responsiveness	Light
BnERF-1	Box 4	ATTAAT	320	6	+	Petroselinum crispum	part of a conserved DNA module involved in light responsiveness	light responsiveness	Light
BnERF-1	Box 4	ATTAAT	959	6	+	Petroselinum crispum	part of a conserved DNA module involved in light responsiveness	light responsiveness	Light
BnERF-1	Box 4	ATTAAT	1060	6	-	Petroselinum crispum	part of a conserved DNA module involved in light responsiveness	light responsiveness	Light
BnERF-1	Box 4	ATTAAT	1207	6	-	Petroselinum crispum	part of a conserved DNA module involved in light responsiveness	light responsiveness	Light
BnERF-1	Box 4	ATTAAT	1817	6	-	Petroselinum crispum	part of a conserved DNA module involved in light responsiveness	light responsiveness	Light
BnERF-1	TCT-motif	TCTTAC	1481	6	+	Arabidopsis thaliana	part of a light responsive element	light responsiveness	Light
BnERF-1	I-box	atGATAAGGTC	1338	10	-	Helianthus annuus	part of a light responsive element	light responsiveness	Light
BnERF-1	GATA-motif	AAGATAAGATT	117	10	-	Arabidopsis thaliana	part of a light responsive element	light responsiveness	Light
BnERF-1	GA-motif	ATAGATAA	1793	8	-	Arabidopsis thaliana	part of a light responsive element	light responsiveness	Light
BnERF-10	MRE	AACCTAA	1377	7	+	Petroselinum crispum	MYB binding site involved in light responsiveness	light responsiveness	Light
BnERF-10	Box 4	ATTAAT	2	6	+	Petroselinum crispum	part of a conserved DNA module involved in light responsiveness	light responsiveness	Light
BnERF-10	Box 4	ATTAAT	73	6	+	Petroselinum crispum	part of a conserved DNA module involved in light responsiveness	light responsiveness	Light
BnERF-10	Box 4	ATTAAT	135	6	+	Petroselinum crispum	part of a conserved DNA module involved in light responsiveness	light responsiveness	Light
BnERF-10	Box 4	ATTAAT	599	6	+	Petroselinum crispum	part of a conserved DNA module involved in light responsiveness	light responsiveness	Light
BnERF-10	Box 4	ATTAAT	1168	6	-	Petroselinum crispum	part of a conserved DNA module involved in light responsiveness	light responsiveness	Light
BnERF-10	ATC-motif	AGTAATCT	1682	8	-	Spinacia oleracea	part of a conserved DNA module involved in light responsiveness	light responsiveness	Light
BnERF-10	TCT-motif	TCTTAC	943	6	-	Arabidopsis thaliana	part of a light responsive element	light responsiveness	Light
BnERF-10	I-box	TGATAATGT	1203	9	+	Solanum tuberosum	part of a light responsive element	light responsiveness	Light
BnERF-10	chs-CMA1a	TTACTTAA	1173	8	-	Daucus carota	part of a light responsive element	light responsiveness	Light
BnERF-10	AE-box	AGAAACAA	34	8	-	Arabidopsis thaliana	part of a module for light response	light responsiveness	Light
BnERF-10	AE-box	AGAAACAA	415	8	+	Arabidopsis thaliana	part of a module for light response	light responsiveness	Light
BnERF-11	ATCT-motif	AATCTAATCC	300	9	-	Pisum sativum	part of a conserved DNA module involved in light responsiveness	light responsiveness	Light
BnERF-11	Box 4	ATTAAT	200	6	+	Petroselinum crispum	part of a conserved DNA module involved in light responsiveness	light responsiveness	Light
BnERF-11	Box 4	ATTAAT	901	6	+	Petroselinum crispum	part of a conserved DNA module involved in light responsiveness	light responsiveness	Light
BnERF-11	Box 4	ATTAAT	1027	6	-	Petroselinum crispum	part of a conserved DNA module involved in light responsiveness	light responsiveness	Light
BnERF-11	Box 4	ATTAAT	1042	6	-	Petroselinum crispum	part of a conserved DNA module involved in light responsiveness	light responsiveness	Light
BnERF-11	Box 4	ATTAAT	1157	6	-	Petroselinum crispum	part of a conserved DNA module involved in light responsiveness	light responsiveness	Light
BnERF-11	Box 4	ATTAAT	1277	6	-	Petroselinum crispum	part of a conserved DNA module involved in light responsiveness	light responsiveness	Light
BnERF-11	TCT-motif	TCTTAC	1460	6	+	Arabidopsis thaliana	part of a light responsive element	light responsiveness	Light
BnERF-11	AE-box	AGAAACAA	1403	8	+	Arabidopsis thaliana	part of a module for light response	light responsiveness	Light
BnERF-11	AE-box	AGAAACAA	1472	8	+	Arabidopsis thaliana	part of a module for light response	light responsiveness	Light
BnERF-12	MRE	AACCTAA	35	7	+	Petroselinum crispum	MYB binding site involved in light responsiveness	light responsiveness	Light
BnERF-12	Box 4	ATTAAT	109	6	+	Petroselinum crispum	part of a conserved DNA module involved in light responsiveness	light responsiveness	Light
BnERF-12	TCT-motif	TCTTAC	1449	6	-	Arabidopsis thaliana	part of a light responsive element	light responsiveness	Light
BnERF-12	Gap-box	CAAATGAA(A/G)A	573	9	+	Arabidopsis thaliana	part of a light responsive element	light responsiveness	Light
BnERF-12	AT1-motif	AATTATTTTTTATT	1121	13	-	Solanum tuberosum	part of a light responsive module	light responsiveness	Light
BnERF-13	Box 4	ATTAAT	354	6	+	Petroselinum crispum	part of a conserved DNA module involved in light responsiveness	light responsiveness	Light
BnERF-13	chs-CMA1a	TTACTTAA	1035	8	-	Daucus carota	part of a light responsive element	light responsiveness	Light
BnERF-13	TCT-motif	TCTTAC	19	6	-	Arabidopsis thaliana	part of a light responsive element	light responsiveness	Light
BnERF-13	TCT-motif	TCTTAC	1337	6	-	Arabidopsis thaliana	part of a light responsive element	light responsiveness	Light
BnERF-13	TCT-motif	TCTTAC	1534	6	+	Arabidopsis thaliana	part of a light responsive element	light responsiveness	Light
BnERF-13	TCT-motif	TCTTAC	1701	6	-	Arabidopsis thaliana	part of a light responsive element	light responsiveness	Light
BnERF-13	Box II	TGGTAATAA	954	9	+	Solanum tuberosum	part of a light responsive element	light responsiveness	Light
BnERF-13	AE-box	AGAAACAA	1908	8	-	Arabidopsis thaliana	part of a module for light response	light responsiveness	Light
BnERF-14	Box 4	ATTAAT	758	6	+	Petroselinum crispum	part of a conserved DNA module involved in light responsiveness	light responsiveness	Light
BnERF-14	TCCC-motif	TCTCCCT	801	7	+	Spinacia oleracea	part of a light responsive element	light responsiveness	Light
BnERF-14	AE-box	AGAAACAA	1294	8	+	Arabidopsis thaliana	part of a module for light response	light responsiveness	Light
BnERF-15	MRE	AACCTAA	750	7	+	Petroselinum crispum	MYB binding site involved in light responsiveness	light responsiveness	Light
BnERF-15	Box 4	ATTAAT	385	6	+	Petroselinum crispum	part of a conserved DNA module involved in light responsiveness	light responsiveness	Light
BnERF-15	Box 4	ATTAAT	410	6	+	Petroselinum crispum	part of a conserved DNA module involved in light responsiveness	light responsiveness	Light
BnERF-15	Box 4	ATTAAT	1157	6	-	Petroselinum crispum	part of a conserved DNA module involved in light responsiveness	light responsiveness	Light
BnERF-15	Box 4	ATTAAT	1273	6	-	Petroselinum crispum	part of a conserved DNA module involved in light responsiveness	light responsiveness	Light
BnERF-15	Box 4	ATTAAT	1530	6	-	Petroselinum crispum	part of a conserved DNA module involved in light responsiveness	light responsiveness	Light
BnERF-15	Box 4	ATTAAT	1613	6	-	Petroselinum crispum	part of a conserved DNA module involved in light responsiveness	light responsiveness	Light
BnERF-15	GA-motif	ATAGATAA	427	8	+	Arabidopsis thaliana	part of a light responsive element	light responsiveness	Light
BnERF-15	GA-motif	ATAGATAA	595	8	-	Arabidopsis thaliana	part of a light responsive element	light responsiveness	Light
BnERF-16	ATCT-motif	AATCTAATCC	1406	9	-	Pisum sativum	part of a conserved DNA module involved in light responsiveness	light responsiveness	Light
BnERF-16	ATCT-motif	AATCTAATCC	1411	9	-	Pisum sativum	part of a conserved DNA module involved in light responsiveness	light responsiveness	Light
BnERF-16	ATCT-motif	AATCTAATCC	1513	9	+	Pisum sativum	part of a conserved DNA module involved in light responsiveness	light responsiveness	Light
BnERF-16	ATCT-motif	AATCTAATCC	1608	10	+	Pisum sativum	part of a conserved DNA module involved in light responsiveness	light responsiveness	Light
BnERF-16	ATCT-motif	AATCTAATCC	1613	9	+	Pisum sativum	part of a conserved DNA module involved in light responsiveness	light responsiveness	Light
BnERF-16	ATCT-motif	AATCTAATCC	1618	9	+	Pisum sativum	part of a conserved DNA module involved in light responsiveness	light responsiveness	Light
BnERF-16	Box 4	ATTAAT	729	6	+	Petroselinum crispum	part of a conserved DNA module involved in light responsiveness	light responsiveness	Light
BnERF-16	Box 4	ATTAAT	1480	6	-	Petroselinum crispum	part of a conserved DNA module involved in light responsiveness	light responsiveness	Light
BnERF-16	chs-CMA1a	TTACTTAA	542	8	+	Daucus carota	part of a light responsive element	light responsiveness	Light
BnERF-16	TCT-motif	TCTTAC	197	6	-	Arabidopsis thaliana	part of a light responsive element	light responsiveness	Light
BnERF-16	TCT-motif	TCTTAC	256	6	+	Arabidopsis thaliana	part of a light responsive element	light responsiveness	Light
BnERF-16	TCT-motif	TCTTAC	1106	6	+	Arabidopsis thaliana	part of a light responsive element	light responsiveness	Light
BnERF-16	TCT-motif	TCTTAC	1138	6	+	Arabidopsis thaliana	part of a light responsive element	light responsiveness	Light
BnERF-16	TCT-motif	TCTTAC	1357	6	-	Arabidopsis thaliana	part of a light responsive element	light responsiveness	Light
BnERF-16	I-box	cCATATCCAAT	960	10	-	Flaveria trinervia	part of a light responsive element	light responsiveness	Light
BnERF-16	I-box	cCATATCCAAT	1600	10	+	Flaveria trinervia	part of a light responsive element	light responsiveness	Light
BnERF-17	Box 4	ATTAAT	9	6	+	Petroselinum crispum	part of a conserved DNA module involved in light responsiveness	light responsiveness	Light
BnERF-17	Box 4	ATTAAT	1337	6	-	Petroselinum crispum	part of a conserved DNA module involved in light responsiveness	light responsiveness	Light
BnERF-17	Box 4	ATTAAT	1483	6	-	Petroselinum crispum	part of a conserved DNA module involved in light responsiveness	light responsiveness	Light
BnERF-17	Box 4	ATTAAT	1719	6	-	Petroselinum crispum	part of a conserved DNA module involved in light responsiveness	light responsiveness	Light
BnERF-17	TCT-motif	TCTTAC	1786	6	+	Arabidopsis thaliana	part of a light responsive element	light responsiveness	Light
BnERF-18	Box 4	ATTAAT	1319	6	-	Petroselinum crispum	part of a conserved DNA module involved in light responsiveness	light responsiveness	Light
BnERF-18	TCT-motif	TCTTAC	194	6	+	Arabidopsis thaliana	part of a light responsive element	light responsiveness	Light
BnERF-18	TCT-motif	TCTTAC	455	6	-	Arabidopsis thaliana	part of a light responsive element	light responsiveness	Light
BnERF-18	TCT-motif	TCTTAC	1658	6	-	Arabidopsis thaliana	part of a light responsive element	light responsiveness	Light
BnERF-18	TCT-motif	TCTTAC	1717	6	+	Arabidopsis thaliana	part of a light responsive element	light responsiveness	Light
BnERF-19	MRE	AACCTAA	1523	7	-	Petroselinum crispum	MYB binding site involved in light responsiveness	light responsiveness	Light
BnERF-19	Box 4	ATTAAT	463	6	+	Petroselinum crispum	part of a conserved DNA module involved in light responsiveness	light responsiveness	Light
BnERF-19	Box 4	ATTAAT	1193	6	-	Petroselinum crispum	part of a conserved DNA module involved in light responsiveness	light responsiveness	Light
BnERF-19	LAMP-element	CTTTATCA	614	8	-	Pisum sativum	part of a light responsive element	light responsiveness	Light
BnERF-19	GA-motif	ATAGATAA	1731	8	+	Arabidopsis thaliana	part of a light responsive element	light responsiveness	Light
BnERF-19	TCT-motif	TCTTAC	201	6	-	Arabidopsis thaliana	part of a light responsive element	light responsiveness	Light
BnERF-19	TCT-motif	TCTTAC	542	6	+	Arabidopsis thaliana	part of a light responsive element	light responsiveness	Light
BnERF-19	TCT-motif	TCTTAC	841	6	-	Arabidopsis thaliana	part of a light responsive element	light responsiveness	Light
BnERF-2	Box 4	ATTAAT	588	6	+	Petroselinum crispum	part of a conserved DNA module involved in light responsiveness	light responsiveness	Light
BnERF-2	Box 4	ATTAAT	1648	6	-	Petroselinum crispum	part of a conserved DNA module involved in light responsiveness	light responsiveness	Light
BnERF-2	AE-box	AGAAACTT	1699	8	+	Arabidopsis thaliana	part of a module for light response	light responsiveness	Light
BnERF-22	MRE	AACCTAA	1354	7	+	Petroselinum crispum	MYB binding site involved in light responsiveness	light responsiveness	Light
BnERF-23	Box 4	ATTAAT	140	6	+	Petroselinum crispum	part of a conserved DNA module involved in light responsiveness	light responsiveness	Light
BnERF-23	Box 4	ATTAAT	294	6	+	Petroselinum crispum	part of a conserved DNA module involved in light responsiveness	light responsiveness	Light
BnERF-23	Box 4	ATTAAT	1581	6	-	Petroselinum crispum	part of a conserved DNA module involved in light responsiveness	light responsiveness	Light
BnERF-23	Box 4	ATTAAT	1693	6	-	Petroselinum crispum	part of a conserved DNA module involved in light responsiveness	light responsiveness	Light
BnERF-23	I-box	cCATATCCAAT	1515	10	-	Flaveria trinervia	part of a light responsive element	light responsiveness	Light
BnERF-23	GATA-motif	AAGGATAAGG	263	9	+	Solanum tuberosum	part of a light responsive element	light responsiveness	Light
BnERF-23	TCCC-motif	TCTCCCT	1975	7	+	Spinacia oleracea	part of a light responsive element	light responsiveness	Light
BnERF-24	Box 4	ATTAAT	379	6	+	Petroselinum crispum	part of a conserved DNA module involved in light responsiveness	light responsiveness	Light
BnERF-24	Box 4	ATTAAT	465	6	+	Petroselinum crispum	part of a conserved DNA module involved in light responsiveness	light responsiveness	Light
BnERF-24	GATA-motif	GATAGGA	246	7	-	Arabidopsis thaliana	part of a light responsive element	light responsiveness	Light
BnERF-24	GATA-motif	GATAGGG	1076	7	+	Pisum sativum	part of a light responsive element	light responsiveness	Light
BnERF-24	Gap-box	CAAATGAA(A/G)A	746	9.5	+	Arabidopsis thaliana	part of a light responsive element	light responsiveness	Light
BnERF-24	I-box	TGATAATGT	154	9	+	Solanum tuberosum	part of a light responsive element	light responsiveness	Light
BnERF-24	AE-box	AGAAACTT	317	8	-	Arabidopsis thaliana	part of a module for light response	light responsiveness	Light
BnERF-25	Box 4	ATTAAT	672	6	+	Petroselinum crispum	part of a conserved DNA module involved in light responsiveness	light responsiveness	Light
BnERF-25	Box 4	ATTAAT	1581	6	-	Petroselinum crispum	part of a conserved DNA module involved in light responsiveness	light responsiveness	Light
BnERF-25	ATC-motif	AGTAATCT	301	8	+	Spinacia oleracea	part of a conserved DNA module involved in light responsiveness	light responsiveness	Light
BnERF-25	GATA-motif	AAGATAAGATT	379	10	+	Arabidopsis thaliana	part of a light responsive element	light responsiveness	Light
BnERF-25	GA-motif	ATAGATAA	1255	8	-	Arabidopsis thaliana	part of a light responsive element	light responsiveness	Light
BnERF-25	GA-motif	ATAGATAA	1323	8	+	Arabidopsis thaliana	part of a light responsive element	light responsiveness	Light
BnERF-25	AE-box	AGAAACAA	1235	8	-	Arabidopsis thaliana	part of a module for light response	light responsiveness	Light
BnERF-26	MRE	AACCTAA	1970	7	+	Petroselinum crispum	MYB binding site involved in light responsiveness	light responsiveness	Light
BnERF-26	Box 4	ATTAAT	720	6	+	Petroselinum crispum	part of a conserved DNA module involved in light responsiveness	light responsiveness	Light
BnERF-26	Box 4	ATTAAT	889	6	+	Petroselinum crispum	part of a conserved DNA module involved in light responsiveness	light responsiveness	Light
BnERF-26	Box 4	ATTAAT	1688	6	-	Petroselinum crispum	part of a conserved DNA module involved in light responsiveness	light responsiveness	Light
BnERF-26	TCT-motif	TCTTAC	390	6	+	Arabidopsis thaliana	part of a light responsive element	light responsiveness	Light
BnERF-26	TCCC-motif	TCTCCCT	297	7	+	Spinacia oleracea	part of a light responsive element	light responsiveness	Light
BnERF-27	Box 4	ATTAAT	404	6	+	Petroselinum crispum	part of a conserved DNA module involved in light responsiveness	light responsiveness	Light
BnERF-27	Box 4	ATTAAT	420	6	+	Petroselinum crispum	part of a conserved DNA module involved in light responsiveness	light responsiveness	Light
BnERF-27	Box 4	ATTAAT	506	6	+	Petroselinum crispum	part of a conserved DNA module involved in light responsiveness	light responsiveness	Light
BnERF-27	Box 4	ATTAAT	1780	6	-	Petroselinum crispum	part of a conserved DNA module involved in light responsiveness	light responsiveness	Light
BnERF-27	GATA-motif	AAGATAAGATT	1589	10	+	Arabidopsis thaliana	part of a light responsive element	light responsiveness	Light
BnERF-27	chs-CMA1a	TTACTTAA	75	8	-	Daucus carota	part of a light responsive element	light responsiveness	Light
BnERF-27	TCT-motif	TCTTAC	1587	6	-	Arabidopsis thaliana	part of a light responsive element	light responsiveness	Light
BnERF-27	AE-box	AGAAACAA	1067	8	+	Arabidopsis thaliana	part of a module for light response	light responsiveness	Light
BnERF-28	ATCT-motif	AATCTAATCC	109	9	+	Pisum sativum	part of a conserved DNA module involved in light responsiveness	light responsiveness	Light
BnERF-28	Box 4	ATTAAT	1151	6	-	Petroselinum crispum	part of a conserved DNA module involved in light responsiveness	light responsiveness	Light
BnERF-28	Box 4	ATTAAT	1192	6	-	Petroselinum crispum	part of a conserved DNA module involved in light responsiveness	light responsiveness	Light
BnERF-28	Box 4	ATTAAT	1389	6	-	Petroselinum crispum	part of a conserved DNA module involved in light responsiveness	light responsiveness	Light
BnERF-28	Box 4	ATTAAT	1555	6	-	Petroselinum crispum	part of a conserved DNA module involved in light responsiveness	light responsiveness	Light
BnERF-28	Box 4	ATTAAT	1825	6	-	Petroselinum crispum	part of a conserved DNA module involved in light responsiveness	light responsiveness	Light
BnERF-28	Box 4	ATTAAT	1955	6	-	Petroselinum crispum	part of a conserved DNA module involved in light responsiveness	light responsiveness	Light
BnERF-28	I-box	cGATAAGGCG	646	9	+	Zea mays	part of a light responsive element	light responsiveness	Light
BnERF-28	GATA-motif	GATAGGG	256	7	+	Pisum sativum	part of a light responsive element	light responsiveness	Light
BnERF-28	AT1-motif	AATTATTTTTTATT	1329	13	+	Solanum tuberosum	part of a light responsive module	light responsiveness	Light
BnERF-28	AE-box	AGAAACAA	423	8	-	Arabidopsis thaliana	part of a module for light response	light responsiveness	Light
BnERF-28	AE-box	AGAAACAA	1287	8	-	Arabidopsis thaliana	part of a module for light response	light responsiveness	Light
BnERF-29	MRE	AACCTAA	1908	7	+	Petroselinum crispum	MYB binding site involved in light responsiveness	light responsiveness	Light
BnERF-29	Box 4	ATTAAT	1403	6	-	Petroselinum crispum	part of a conserved DNA module involved in light responsiveness	light responsiveness	Light
BnERF-29	I-box	ccttatcct	310	9	-	Arabidopsis thaliana	part of a light responsive element	light responsiveness	Light
BnERF-29	I-box	GTATAAGGCC	311	9	+	Larix laricina	part of a light responsive element	light responsiveness	Light
BnERF-29	I-box	AGATAAGG	1012	8	+	Triticum aestivum	part of a light responsive element	light responsiveness	Light
BnERF-29	TCT-motif	TCTTAC	598	6	+	Arabidopsis thaliana	part of a light responsive element	light responsiveness	Light
BnERF-29	GA-motif	ATAGATAA	799	8	-	Arabidopsis thaliana	part of a light responsive element	light responsiveness	Light
BnERF-29	GA-motif	ATAGATAA	1010	8	+	Arabidopsis thaliana	part of a light responsive element	light responsiveness	Light
BnERF-29	GATA-motif	AAGGATAAGG	137	9	-	Solanum tuberosum	part of a light responsive element	light responsiveness	Light
BnERF-29	GATA-motif	AAGGATAAGG	309	9	+	Solanum tuberosum	part of a light responsive element	light responsiveness	Light
BnERF-29	AE-box	AGAAACAA	455	8	+	Arabidopsis thaliana	part of a module for light response	light responsiveness	Light
BnERF-29	AE-box	AGAAACAA	1115	8	+	Arabidopsis thaliana	part of a module for light response	light responsiveness	Light
BnERF-3	Box 4	ATTAAT	224	6	+	Petroselinum crispum	part of a conserved DNA module involved in light responsiveness	light responsiveness	Light
BnERF-3	Box 4	ATTAAT	886	6	+	Petroselinum crispum	part of a conserved DNA module involved in light responsiveness	light responsiveness	Light
BnERF-3	chs-CMA1a	TTACTTAA	616	8	-	Daucus carota	part of a light responsive element	light responsiveness	Light
BnERF-3	TCT-motif	TCTTAC	23	6	-	Arabidopsis thaliana	part of a light responsive element	light responsiveness	Light
BnERF-30	MRE	AACCTAA	321	7	-	Petroselinum crispum	MYB binding site involved in light responsiveness	light responsiveness	Light
BnERF-30	Box 4	ATTAAT	517	6	+	Petroselinum crispum	part of a conserved DNA module involved in light responsiveness	light responsiveness	Light
BnERF-30	Box 4	ATTAAT	1740	6	-	Petroselinum crispum	part of a conserved DNA module involved in light responsiveness	light responsiveness	Light
BnERF-31	MRE	AACCTAA	1400	7	+	Petroselinum crispum	MYB binding site involved in light responsiveness	light responsiveness	Light
BnERF-31	Box 4	ATTAAT	620	6	+	Petroselinum crispum	part of a conserved DNA module involved in light responsiveness	light responsiveness	Light
BnERF-31	Box 4	ATTAAT	1153	6	-	Petroselinum crispum	part of a conserved DNA module involved in light responsiveness	light responsiveness	Light
BnERF-31	Box 4	ATTAAT	1211	6	-	Petroselinum crispum	part of a conserved DNA module involved in light responsiveness	light responsiveness	Light
BnERF-31	Box 4	ATTAAT	1327	6	-	Petroselinum crispum	part of a conserved DNA module involved in light responsiveness	light responsiveness	Light
BnERF-31	I-box	gGATAAGGTG	1761	9	+	Zea mays	part of a light responsive element	light responsiveness	Light
BnERF-31	TCT-motif	TCTTAC	768	6	+	Arabidopsis thaliana	part of a light responsive element	light responsiveness	Light
BnERF-31	GATA-motif	AAGGATAAGG	1759	9	+	Solanum tuberosum	part of a light responsive element	light responsiveness	Light
BnERF-31	GTGGC-motif	CAGCGTGTGGC	1457	10	+	Hordeum vulgare	part of a light responsive element	light responsiveness	Light
BnERF-32	Box 4	ATTAAT	638	6	+	Petroselinum crispum	part of a conserved DNA module involved in light responsiveness	light responsiveness	Light
BnERF-32	Box 4	ATTAAT	654	6	+	Petroselinum crispum	part of a conserved DNA module involved in light responsiveness	light responsiveness	Light
BnERF-32	Box 4	ATTAAT	769	6	+	Petroselinum crispum	part of a conserved DNA module involved in light responsiveness	light responsiveness	Light
BnERF-32	GATA-motif	AAGGATAAGG	434	9	+	Solanum tuberosum	part of a light responsive element	light responsiveness	Light
BnERF-32	Box II	CCACGTGGC	840	9	-	Petroselinum crispum	part of a light responsive element	light responsiveness	Light
BnERF-32	Box II	CCACGTGGC	841	9	+	Petroselinum crispum	part of a light responsive element	light responsiveness	Light
BnERF-33	ATC-motif	AGTAATCT	1672	8	+	Spinacia oleracea	part of a conserved DNA module involved in light responsiveness	light responsiveness	Light
BnERF-33	Box 4	ATTAAT	99	6	+	Petroselinum crispum	part of a conserved DNA module involved in light responsiveness	light responsiveness	Light
BnERF-33	TCT-motif	TCTTAC	532	6	-	Arabidopsis thaliana	part of a light responsive element	light responsiveness	Light
BnERF-33	TCCC-motif	TCTCCCT	1774	7	+	Spinacia oleracea	part of a light responsive element	light responsiveness	Light
BnERF-33	AT1-motif	AATTATTTTTTATT	1623	13	+	Solanum tuberosum	part of a light responsive module	light responsiveness	Light
BnERF-33	AE-box	AGAAACAA	433	8	-	Arabidopsis thaliana	part of a module for light response	light responsiveness	Light
BnERF-34	Box 4	ATTAAT	758	6	+	Petroselinum crispum	part of a conserved DNA module involved in light responsiveness	light responsiveness	Light
BnERF-34	Box 4	ATTAAT	1421	6	-	Petroselinum crispum	part of a conserved DNA module involved in light responsiveness	light responsiveness	Light
BnERF-34	Box 4	ATTAAT	1932	6	-	Petroselinum crispum	part of a conserved DNA module involved in light responsiveness	light responsiveness	Light
BnERF-34	TCT-motif	TCTTAC	1924	6	+	Arabidopsis thaliana	part of a light responsive element	light responsiveness	Light
BnERF-34	LAMP-element	CTTTATCA	1261	8	-	Pisum sativum	part of a light responsive element	light responsiveness	Light
BnERF-34	GATA-motif	AAGGATAAGG	988	9	-	Solanum tuberosum	part of a light responsive element	light responsiveness	Light
BnERF-34	GATA-motif	AAGGATAAGG	1786	9	-	Solanum tuberosum	part of a light responsive element	light responsiveness	Light
BnERF-35	GATA-motif	AAGATAAGATT	41	10	-	Arabidopsis thaliana	part of a light responsive element	light responsiveness	Light
BnERF-35	TCT-motif	TCTTAC	43	6	+	Arabidopsis thaliana	part of a light responsive element	light responsiveness	Light
BnERF-35	AT1-motif	AATTATTTTTTATT	899	14	-	Solanum tuberosum	part of a light responsive module	light responsiveness	Light
BnERF-36	Box 4	ATTAAT	427	6	+	Petroselinum crispum	part of a conserved DNA module involved in light responsiveness	light responsiveness	Light
BnERF-36	Box 4	ATTAAT	495	6	+	Petroselinum crispum	part of a conserved DNA module involved in light responsiveness	light responsiveness	Light
BnERF-36	Box 4	ATTAAT	1031	6	-	Petroselinum crispum	part of a conserved DNA module involved in light responsiveness	light responsiveness	Light
BnERF-36	Box 4	ATTAAT	1498	6	-	Petroselinum crispum	part of a conserved DNA module involved in light responsiveness	light responsiveness	Light
BnERF-37	Box 4	ATTAAT	917	6	+	Petroselinum crispum	part of a conserved DNA module involved in light responsiveness	light responsiveness	Light
BnERF-37	Box 4	ATTAAT	1327	6	-	Petroselinum crispum	part of a conserved DNA module involved in light responsiveness	light responsiveness	Light
BnERF-37	Box 4	ATTAAT	1344	6	-	Petroselinum crispum	part of a conserved DNA module involved in light responsiveness	light responsiveness	Light
BnERF-37	GATA-motif	AAGATAAGATT	1914	10	-	Arabidopsis thaliana	part of a light responsive element	light responsiveness	Light
BnERF-37	TCCC-motif	TCTCCCT	1425	7	-	Spinacia oleracea	part of a light responsive element	light responsiveness	Light
BnERF-37	AE-box	AGAAACAA	1361	8	-	Arabidopsis thaliana	part of a module for light response	light responsiveness	Light
BnERF-38	Box 4	ATTAAT	1172	6	-	Petroselinum crispum	part of a conserved DNA module involved in light responsiveness	light responsiveness	Light
BnERF-38	TCT-motif	TCTTAC	521	6	+	Arabidopsis thaliana	part of a light responsive element	light responsiveness	Light
BnERF-38	LAMP-element	CTTTATCA	1706	8	+	Pisum sativum	part of a light responsive element	light responsiveness	Light
BnERF-39	Box 4	ATTAAT	1276	6	-	Petroselinum crispum	part of a conserved DNA module involved in light responsiveness	light responsiveness	Light
BnERF-39	Box 4	ATTAAT	1657	6	-	Petroselinum crispum	part of a conserved DNA module involved in light responsiveness	light responsiveness	Light
BnERF-39	ATCT-motif	AATCTAATCC	1027	9	-	Pisum sativum	part of a conserved DNA module involved in light responsiveness	light responsiveness	Light
BnERF-39	TCT-motif	TCTTAC	350	6	-	Arabidopsis thaliana	part of a light responsive element	light responsiveness	Light
BnERF-39	LAMP-element	CTTTATCA	1459	8	-	Pisum sativum	part of a light responsive element	light responsiveness	Light
BnERF-4	Box 4	ATTAAT	1326	6	-	Petroselinum crispum	part of a conserved DNA module involved in light responsiveness	light responsiveness	Light
BnERF-4	Box 4	ATTAAT	1958	6	-	Petroselinum crispum	part of a conserved DNA module involved in light responsiveness	light responsiveness	Light
BnERF-4	Box 4	ATTAAT	1979	6	-	Petroselinum crispum	part of a conserved DNA module involved in light responsiveness	light responsiveness	Light
BnERF-4	I-box	atGATAAGGTC	1042	10	+	Helianthus annuus	part of a light responsive element	light responsiveness	Light
BnERF-4	GATA-motif	AAGATAAGATT	1337	10	-	Arabidopsis thaliana	part of a light responsive element	light responsiveness	Light
BnERF-4	GA-motif	ATAGATAA	1384	8	-	Arabidopsis thaliana	part of a light responsive element	light responsiveness	Light
BnERF-40	Box 4	ATTAAT	672	6	+	Petroselinum crispum	part of a conserved DNA module involved in light responsiveness	light responsiveness	Light
BnERF-40	Box 4	ATTAAT	854	6	+	Petroselinum crispum	part of a conserved DNA module involved in light responsiveness	light responsiveness	Light
BnERF-40	Box 4	ATTAAT	907	6	+	Petroselinum crispum	part of a conserved DNA module involved in light responsiveness	light responsiveness	Light
BnERF-40	TCT-motif	TCTTAC	359	6	+	Arabidopsis thaliana	part of a light responsive element	light responsiveness	Light
BnERF-40	TCT-motif	TCTTAC	1355	6	+	Arabidopsis thaliana	part of a light responsive element	light responsiveness	Light
BnERF-40	TCCC-motif	TCTCCCT	1898	7	+	Spinacia oleracea	part of a light responsive element	light responsiveness	Light
BnERF-40	AE-box	AGAAACAA	1176	8	-	Arabidopsis thaliana	part of a module for light response	light responsiveness	Light
BnERF-41	Box 4	ATTAAT	409	6	+	Petroselinum crispum	part of a conserved DNA module involved in light responsiveness	light responsiveness	Light
BnERF-41	Box 4	ATTAAT	1878	6	-	Petroselinum crispum	part of a conserved DNA module involved in light responsiveness	light responsiveness	Light
BnERF-41	I-box	TGATAATGT	1556	9	+	Solanum tuberosum	part of a light responsive element	light responsiveness	Light
BnERF-41	chs-CMA1a	TTACTTAA	374	8	-	Daucus carota	part of a light responsive element	light responsiveness	Light
BnERF-41	AE-box	AGAAACAA	172	8	+	Arabidopsis thaliana	part of a module for light response	light responsiveness	Light
BnERF-41	AE-box	AGAAACTT	1761	8	+	Arabidopsis thaliana	part of a module for light response	light responsiveness	Light
BnERF-5	Box 4	ATTAAT	1284	6	-	Petroselinum crispum	part of a conserved DNA module involved in light responsiveness	light responsiveness	Light
BnERF-5	Box 4	ATTAAT	1435	6	-	Petroselinum crispum	part of a conserved DNA module involved in light responsiveness	light responsiveness	Light
BnERF-5	Box 4	ATTAAT	1597	6	-	Petroselinum crispum	part of a conserved DNA module involved in light responsiveness	light responsiveness	Light
BnERF-5	TCT-motif	TCTTAC	834	6	-	Arabidopsis thaliana	part of a light responsive element	light responsiveness	Light
BnERF-6	Box 4	ATTAAT	448	6	+	Petroselinum crispum	part of a conserved DNA module involved in light responsiveness	light responsiveness	Light
BnERF-6	Box 4	ATTAAT	526	6	+	Petroselinum crispum	part of a conserved DNA module involved in light responsiveness	light responsiveness	Light
BnERF-6	Box 4	ATTAAT	878	6	+	Petroselinum crispum	part of a conserved DNA module involved in light responsiveness	light responsiveness	Light
BnERF-6	Box 4	ATTAAT	974	6	+	Petroselinum crispum	part of a conserved DNA module involved in light responsiveness	light responsiveness	Light
BnERF-6	Box 4	ATTAAT	1476	6	-	Petroselinum crispum	part of a conserved DNA module involved in light responsiveness	light responsiveness	Light
BnERF-6	GATA-motif	GATAGGA	704	7	-	Arabidopsis thaliana	part of a light responsive element	light responsiveness	Light
BnERF-6	TGGCA	GACACCAAGTGGCA	1499	13	+	Oryza sativa	part of a light responsive element	light responsiveness	Light
BnERF-7	MRE	AACCTAA	732	7	+	Petroselinum crispum	MYB binding site involved in light responsiveness	light responsiveness	Light
BnERF-7	Box 4	ATTAAT	285	6	+	Petroselinum crispum	part of a conserved DNA module involved in light responsiveness	light responsiveness	Light
BnERF-7	Box 4	ATTAAT	455	6	+	Petroselinum crispum	part of a conserved DNA module involved in light responsiveness	light responsiveness	Light
BnERF-7	Box 4	ATTAAT	597	6	+	Petroselinum crispum	part of a conserved DNA module involved in light responsiveness	light responsiveness	Light
BnERF-7	Box 4	ATTAAT	834	6	+	Petroselinum crispum	part of a conserved DNA module involved in light responsiveness	light responsiveness	Light
BnERF-7	LAMP-element	CTTTATCA	923	8	-	Pisum sativum	part of a light responsive element	light responsiveness	Light
BnERF-7	chs-Unit 1 m1	ACCTAACCCGC	737	10	+	Hordeum vulgare	part of a light responsive element	light responsiveness	Light
BnERF-8	MRE	AACCTAA	748	7	+	Petroselinum crispum	MYB binding site involved in light responsiveness	light responsiveness	Light
BnERF-8	Box 4	ATTAAT	155	6	+	Petroselinum crispum	part of a conserved DNA module involved in light responsiveness	light responsiveness	Light
BnERF-8	Box 4	ATTAAT	1026	6	-	Petroselinum crispum	part of a conserved DNA module involved in light responsiveness	light responsiveness	Light
BnERF-8	Box 4	ATTAAT	1482	6	-	Petroselinum crispum	part of a conserved DNA module involved in light responsiveness	light responsiveness	Light
BnERF-8	Box 4	ATTAAT	1694	6	-	Petroselinum crispum	part of a conserved DNA module involved in light responsiveness	light responsiveness	Light
BnERF-8	chs-CMA1a	TTACTTAA	475	8	-	Daucus carota	part of a light responsive element	light responsiveness	Light
BnERF-8	AE-box	AGAAACAA	291	8	+	Arabidopsis thaliana	part of a module for light response	light responsiveness	Light
BnERF-9	Box 4	ATTAAT	159	6	+	Petroselinum crispum	part of a conserved DNA module involved in light responsiveness	light responsiveness	Light
BnERF-9	Box 4	ATTAAT	526	6	+	Petroselinum crispum	part of a conserved DNA module involved in light responsiveness	light responsiveness	Light
BnERF-9	Box 4	ATTAAT	618	6	+	Petroselinum crispum	part of a conserved DNA module involved in light responsiveness	light responsiveness	Light
BnERF-9	Box 4	ATTAAT	1060	6	-	Petroselinum crispum	part of a conserved DNA module involved in light responsiveness	light responsiveness	Light
BnERF-9	Box 4	ATTAAT	1313	6	-	Petroselinum crispum	part of a conserved DNA module involved in light responsiveness	light responsiveness	Light
BnERF-9	TCCC-motif	TCTCCCT	842	7	+	Spinacia oleracea	part of a light responsive element	light responsiveness	Light
BnERF-9	GA-motif	ATAGATAA	427	8	+	Arabidopsis thaliana	part of a light responsive element	light responsiveness	Light
BnERF-9	GA-motif	ATAGATAA	459	8	+	Arabidopsis thaliana	part of a light responsive element	light responsiveness	Light
BnERF-9	AT1-motif	AATTATTTTTTATT	1637	13	-	Solanum tuberosum	part of a light responsive module	light responsiveness	Light
BnERF-9	AE-box	AGAAACAA	1223	8	-	Arabidopsis thaliana	part of a module for light response	light responsiveness	Light
BnRAV-1	Box 4	ATTAAT	222	6	+	Petroselinum crispum	part of a conserved DNA module involved in light responsiveness	light responsiveness	Light
BnRAV-1	Box 4	ATTAAT	1823	6	-	Petroselinum crispum	part of a conserved DNA module involved in light responsiveness	light responsiveness	Light
BnRAV-1	TCT-motif	TCTTAC	851	6	-	Arabidopsis thaliana	part of a light responsive element	light responsiveness	Light
BnRAV-1	TCT-motif	TCTTAC	1726	6	-	Arabidopsis thaliana	part of a light responsive element	light responsiveness	Light
BnRAV-1	I-box	GGATGAGATAAGATT	1125	14	+	Lycopersicon esculentum	part of a light responsive element	light responsiveness	Light
BnRAV-1	TCCC-motif	TCTCCCT	615	7	-	Spinacia oleracea	part of a light responsive element	light responsiveness	Light
BnRAV-1	TCCC-motif	TCTCCCT	865	7	-	Spinacia oleracea	part of a light responsive element	light responsiveness	Light
BnRAV-1	TCCC-motif	TCTCCCT	926	7	+	Spinacia oleracea	part of a light responsive element	light responsiveness	Light
BnRAV-1	TCCC-motif	TCTCCCT	1632	7	+	Spinacia oleracea	part of a light responsive element	light responsiveness	Light
BnRAV-1	GATA-motif	AAGATAAGATT	1129	10	+	Arabidopsis thaliana	part of a light responsive element	light responsiveness	Light
BnRAV-1	AE-box	AGAAACAA	591	8	+	Arabidopsis thaliana	part of a module for light response	light responsiveness	Light
BnRAV-2	Box 4	ATTAAT	1152	6	-	Petroselinum crispum	part of a conserved DNA module involved in light responsiveness	light responsiveness	Light
BnRAV-2	Box 4	ATTAAT	1966	6	-	Petroselinum crispum	part of a conserved DNA module involved in light responsiveness	light responsiveness	Light
BnRAV-2	ATCT-motif	AATCTAATCC	1959	9	-	Pisum sativum	part of a conserved DNA module involved in light responsiveness	light responsiveness	Light
BnRAV-2	TCT-motif	TCTTAC	1605	6	+	Arabidopsis thaliana	part of a light responsive element	light responsiveness	Light
BnRAV-2	Box II	TGGTAATAA	120	9	-	Solanum tuberosum	part of a light responsive element	light responsiveness	Light
BnRAV-2	AE-box	AGAAACAA	1371	8	-	Arabidopsis thaliana	part of a module for light response	light responsiveness	Light
BnRAV-2	AE-box	AGAAACAA	1904	8	-	Arabidopsis thaliana	part of a module for light response	light responsiveness	Light
BnRAV-3	MRE	AACCTAA	1265	7	-	Petroselinum crispum	MYB binding site involved in light responsiveness	light responsiveness	Light
BnRAV-3	Box 4	ATTAAT	86	6	+	Petroselinum crispum	part of a conserved DNA module involved in light responsiveness	light responsiveness	Light
BnRAV-3	Box 4	ATTAAT	1394	6	-	Petroselinum crispum	part of a conserved DNA module involved in light responsiveness	light responsiveness	Light
BnRAV-3	Box 4	ATTAAT	1604	6	-	Petroselinum crispum	part of a conserved DNA module involved in light responsiveness	light responsiveness	Light
BnRAV-3	ATC-motif	AGTAATCT	756	8	-	Spinacia oleracea	part of a conserved DNA module involved in light responsiveness	light responsiveness	Light
BnRAV-3	chs-CMA1a	TTACTTAA	658	8	+	Daucus carota	part of a light responsive element	light responsiveness	Light
BnRAV-3	TCT-motif	TCTTAC	626	6	+	Arabidopsis thaliana	part of a light responsive element	light responsiveness	Light
BnRAV-3	TCT-motif	TCTTAC	1823	6	+	Arabidopsis thaliana	part of a light responsive element	light responsiveness	Light
BnRAV-3	AE-box	AGAAACAA	1663	8	+	Arabidopsis thaliana	part of a module for light response	light responsiveness	Light
BnAP2-1	ACE	CTAACGTATT	856	9	+	Petroselinum crispum	cis-acting element involved in light responsiveness	light responsiveness	Light
BnAP2-1	G-box	CACGTC	433	6	+	Zea mays	cis-acting regulatory element involved in light responsiveness	light responsiveness	Light
BnAP2-1	G-box	CACGTC	867	6	+	Zea mays	cis-acting regulatory element involved in light responsiveness	light responsiveness	Light
BnAP2-10	ACE	CTAACGTATT	1859	9	+	Petroselinum crispum	cis-acting element involved in light responsiveness	light responsiveness	Light
BnAP2-10	G-box	CACGAC	813	6	+	Zea mays	cis-acting regulatory element involved in light responsiveness	light responsiveness	Light
BnAP2-10	G-box	CACGAC	824	6	+	Zea mays	cis-acting regulatory element involved in light responsiveness	light responsiveness	Light
BnAP2-10	G-box	CACGAC	903	6	+	Zea mays	cis-acting regulatory element involved in light responsiveness	light responsiveness	Light
BnAP2-11	G-box	TACGTG	1547	6	-	Arabidopsis thaliana	cis-acting regulatory element involved in light responsiveness	light responsiveness	Light
BnAP2-12	G-box	CACGTG	1311	6	-	Arabidopsis thaliana	cis-acting regulatory element involved in light responsiveness	light responsiveness	Light
BnAP2-12	G-box	TACGTG	1520	6	+	Arabidopsis thaliana	cis-acting regulatory element involved in light responsiveness	light responsiveness	Light
BnAP2-12	G-Box	CACGTT	208	6	+	Pisum sativum	cis-acting regulatory element involved in light responsiveness	light responsiveness	Light
BnAP2-12	G-Box	CACGTG	1311	6	-	Pisum sativum	cis-acting regulatory element involved in light responsiveness	light responsiveness	Light
BnAP2-13	G-Box	CACGTT	1154	6	-	Pisum sativum	cis-acting regulatory element involved in light responsiveness	light responsiveness	Light
BnAP2-14	G-box	CACGTC	577	6	+	Zea mays	cis-acting regulatory element involved in light responsiveness	light responsiveness	Light
BnAP2-15	G-box	CACGTC	1486	6	+	Zea mays	cis-acting regulatory element involved in light responsiveness	light responsiveness	Light
BnAP2-16	G-box	CACGAC	462	6	+	Zea mays	cis-acting regulatory element involved in light responsiveness	light responsiveness	Light
BnAP2-16	G-box	CACGTG	778	6	+	Arabidopsis thaliana	cis-acting regulatory element involved in light responsiveness	light responsiveness	Light
BnAP2-16	G-Box	CACGTG	778	6	+	Pisum sativum	cis-acting regulatory element involved in light responsiveness	light responsiveness	Light
BnAP2-17	G-box	CACGTC	98	6	+	Zea mays	cis-acting regulatory element involved in light responsiveness	light responsiveness	Light
BnAP2-17	G-box	CACGTC	353	6	+	Zea mays	cis-acting regulatory element involved in light responsiveness	light responsiveness	Light
BnAP2-17	G-box	CACGAC	858	6	-	Zea mays	cis-acting regulatory element involved in light responsiveness	light responsiveness	Light
BnAP2-17	G-box	TACGTG	1756	6	+	Arabidopsis thaliana	cis-acting regulatory element involved in light responsiveness	light responsiveness	Light
BnAP2-18	G-Box	CACGTT	243	6	+	Pisum sativum	cis-acting regulatory element involved in light responsiveness	light responsiveness	Light
BnAP2-18	G-Box	CACGTT	1486	6	+	Pisum sativum	cis-acting regulatory element involved in light responsiveness	light responsiveness	Light
BnAP2-2	G-box	TACGTG	972	6	+	Arabidopsis thaliana	cis-acting regulatory element involved in light responsiveness	light responsiveness	Light
BnAP2-3	G-box	TAACACGTAG	428	9	-	Brassica oleracea	cis-acting regulatory element involved in light responsiveness	light responsiveness	Light
BnAP2-3	G-box	TACGTG	429	6	+	Arabidopsis thaliana	cis-acting regulatory element involved in light responsiveness	light responsiveness	Light
BnAP2-4	G-box	TACGTG	713	6	+	Arabidopsis thaliana	cis-acting regulatory element involved in light responsiveness	light responsiveness	Light
BnAP2-5	G-Box	CACGTG	1142	6	-	Pisum sativum	cis-acting regulatory element involved in light responsiveness	light responsiveness	Light
BnAP2-5	G-Box	CACGTT	1743	6	+	Pisum sativum	cis-acting regulatory element involved in light responsiveness	light responsiveness	Light
BnAP2-5	G-box	CACGTG	1142	6	-	Arabidopsis thaliana	cis-acting regulatory element involved in light responsiveness	light responsiveness	Light
BnAP2-6	G-box	CACGTG	1142	6	-	Arabidopsis thaliana	cis-acting regulatory element involved in light responsiveness	light responsiveness	Light
BnAP2-6	G-Box	CACGTG	1142	6	-	Pisum sativum	cis-acting regulatory element involved in light responsiveness	light responsiveness	Light
BnAP2-6	G-Box	CACGTT	1743	6	+	Pisum sativum	cis-acting regulatory element involved in light responsiveness	light responsiveness	Light
BnAP2-7	G-Box	CACGTT	427	6	+	Pisum sativum	cis-acting regulatory element involved in light responsiveness	light responsiveness	Light
BnAP2-7	G-Box	CACGTT	797	6	-	Pisum sativum	cis-acting regulatory element involved in light responsiveness	light responsiveness	Light
BnAP2-7	G-Box	CACGTT	971	6	-	Pisum sativum	cis-acting regulatory element involved in light responsiveness	light responsiveness	Light
BnAP2-7	G-Box	CACGTT	995	6	+	Pisum sativum	cis-acting regulatory element involved in light responsiveness	light responsiveness	Light
BnAP2-9	G-box	CACGAC	405	6	-	Zea mays	cis-acting regulatory element involved in light responsiveness	light responsiveness	Light
BnAP2-9	G-box	TACGTG	1420	6	-	Arabidopsis thaliana	cis-acting regulatory element involved in light responsiveness	light responsiveness	Light
BnDREB-1	G-Box	CACGTG	1717	6	-	Pisum sativum	cis-acting regulatory element involved in light responsiveness	light responsiveness	Light
BnDREB-1	G-Box	CACGTT	1798	6	+	Pisum sativum	cis-acting regulatory element involved in light responsiveness	light responsiveness	Light
BnDREB-1	G-Box	CACGTG	1830	6	-	Pisum sativum	cis-acting regulatory element involved in light responsiveness	light responsiveness	Light
BnDREB-1	G-box	CACGTG	1717	6	-	Arabidopsis thaliana	cis-acting regulatory element involved in light responsiveness	light responsiveness	Light
BnDREB-1	G-box	CACGTC	1751	6	-	Zea mays	cis-acting regulatory element involved in light responsiveness	light responsiveness	Light
BnDREB-1	G-box	CACGTG	1830	6	-	Arabidopsis thaliana	cis-acting regulatory element involved in light responsiveness	light responsiveness	Light
BnDREB-10	G-box	TAAACGTG	112	8	+	Brassica oleracea	cis-acting regulatory element involved in light responsiveness	light responsiveness	Light
BnDREB-10	G-box	TACGTG	171	6	-	Arabidopsis thaliana	cis-acting regulatory element involved in light responsiveness	light responsiveness	Light
BnDREB-10	G-box	CACGTG	1115	6	-	Arabidopsis thaliana	cis-acting regulatory element involved in light responsiveness	light responsiveness	Light
BnDREB-10	G-box	TACGTG	1189	6	-	Arabidopsis thaliana	cis-acting regulatory element involved in light responsiveness	light responsiveness	Light
BnDREB-10	G-Box	CACGTT	114	6	-	Pisum sativum	cis-acting regulatory element involved in light responsiveness	light responsiveness	Light
BnDREB-10	G-Box	CACGTG	1115	6	-	Pisum sativum	cis-acting regulatory element involved in light responsiveness	light responsiveness	Light
BnDREB-10	G-Box	CACGTT	1684	6	+	Pisum sativum	cis-acting regulatory element involved in light responsiveness	light responsiveness	Light
BnDREB-11	G-box	CACGAC	716	6	-	Zea mays	cis-acting regulatory element involved in light responsiveness	light responsiveness	Light
BnDREB-11	G-box	TACGTG	950	6	+	Arabidopsis thaliana	cis-acting regulatory element involved in light responsiveness	light responsiveness	Light
BnDREB-11	G-box	CACGAC	980	6	+	Zea mays	cis-acting regulatory element involved in light responsiveness	light responsiveness	Light
BnDREB-11	G-box	TAAACGTG	1699	8	+	Brassica oleracea	cis-acting regulatory element involved in light responsiveness	light responsiveness	Light
BnDREB-11	G-box	TAACACGTAG	1825	9	+	Brassica oleracea	cis-acting regulatory element involved in light responsiveness	light responsiveness	Light
BnDREB-11	G-box	TACGTG	1828	6	-	Arabidopsis thaliana	cis-acting regulatory element involved in light responsiveness	light responsiveness	Light
BnDREB-11	G-box	CACGTG	1910	6	-	Arabidopsis thaliana	cis-acting regulatory element involved in light responsiveness	light responsiveness	Light
BnDREB-11	G-box	GCCACGTGGA	1930	9	+	Arabidopsis thaliana	cis-acting regulatory element involved in light responsiveness	light responsiveness	Light
BnDREB-11	G-box	CACGTG	1932	6	-	Arabidopsis thaliana	cis-acting regulatory element involved in light responsiveness	light responsiveness	Light
BnDREB-11	G-Box	CACGTT	1701	6	-	Pisum sativum	cis-acting regulatory element involved in light responsiveness	light responsiveness	Light
BnDREB-11	G-Box	CACGTG	1910	6	-	Pisum sativum	cis-acting regulatory element involved in light responsiveness	light responsiveness	Light
BnDREB-11	G-Box	CACGTG	1932	6	-	Pisum sativum	cis-acting regulatory element involved in light responsiveness	light responsiveness	Light
BnDREB-12	G-Box	CACGTG	930	6	+	Pisum sativum	cis-acting regulatory element involved in light responsiveness	light responsiveness	Light
BnDREB-12	G-Box	CACGTG	1588	6	-	Pisum sativum	cis-acting regulatory element involved in light responsiveness	light responsiveness	Light
BnDREB-12	G-Box	CACGTG	1663	6	-	Pisum sativum	cis-acting regulatory element involved in light responsiveness	light responsiveness	Light
BnDREB-12	G-box	CACGTG	930	6	+	Arabidopsis thaliana	cis-acting regulatory element involved in light responsiveness	light responsiveness	Light
BnDREB-12	G-box	CACGTG	1588	6	-	Arabidopsis thaliana	cis-acting regulatory element involved in light responsiveness	light responsiveness	Light
BnDREB-12	G-box	tgACACGTGGCA	1660	12	-	Lycopersicon esculentum	cis-acting regulatory element involved in light responsiveness	light responsiveness	Light
BnDREB-12	G-box	ACACGTGGC	1661	9	-	Brassica napus	cis-acting regulatory element involved in light responsiveness	light responsiveness	Light
BnDREB-12	G-box	CACGTG	1663	6	-	Arabidopsis thaliana	cis-acting regulatory element involved in light responsiveness	light responsiveness	Light
BnDREB-13	G-box	TACGTG	1937	6	-	Arabidopsis thaliana	cis-acting regulatory element involved in light responsiveness	light responsiveness	Light
BnDREB-14	ACE	CTAACGTATT	698	9	+	Petroselinum crispum	cis-acting element involved in light responsiveness	light responsiveness	Light
BnDREB-14	ACE	GACACGTATG	1182	9	-	Petroselinum crispum	cis-acting element involved in light responsiveness	light responsiveness	Light
BnDREB-14	G-Box	CACGTG	33	6	+	Pisum sativum	cis-acting regulatory element involved in light responsiveness	light responsiveness	Light
BnDREB-14	G-box	CACGTG	33	6	+	Arabidopsis thaliana	cis-acting regulatory element involved in light responsiveness	light responsiveness	Light
BnDREB-14	G-box	CACGAC	189	6	-	Zea mays	cis-acting regulatory element involved in light responsiveness	light responsiveness	Light
BnDREB-14	G-box	CACGTC	196	6	+	Zea mays	cis-acting regulatory element involved in light responsiveness	light responsiveness	Light
BnDREB-14	G-box	CACGAC	1189	6	-	Zea mays	cis-acting regulatory element involved in light responsiveness	light responsiveness	Light
BnDREB-14	G-box	CACGAC	1241	6	+	Zea mays	cis-acting regulatory element involved in light responsiveness	light responsiveness	Light
BnDREB-16	G-box	CACGTC	1333	6	+	Zea mays	cis-acting regulatory element involved in light responsiveness	light responsiveness	Light
BnDREB-17	G-box	CACGTC	608	6	-	Zea mays	cis-acting regulatory element involved in light responsiveness	light responsiveness	Light
BnDREB-17	G-box	CCACGTAA	1087	8	+	Brassica napus	cis-acting regulatory element involved in light responsiveness	light responsiveness	Light
BnDREB-17	G-box	TACGTG	1088	6	-	Arabidopsis thaliana	cis-acting regulatory element involved in light responsiveness	light responsiveness	Light
BnDREB-18	G-Box	CACGTT	1094	6	+	Pisum sativum	cis-acting regulatory element involved in light responsiveness	light responsiveness	Light
BnDREB-18	G-box	CACGTC	1492	6	-	Zea mays	cis-acting regulatory element involved in light responsiveness	light responsiveness	Light
BnDREB-19	G-Box	CACGTG	22	6	+	Pisum sativum	cis-acting regulatory element involved in light responsiveness	light responsiveness	Light
BnDREB-19	G-Box	CACGTG	192	6	+	Pisum sativum	cis-acting regulatory element involved in light responsiveness	light responsiveness	Light
BnDREB-19	G-Box	CACGTT	670	6	-	Pisum sativum	cis-acting regulatory element involved in light responsiveness	light responsiveness	Light
BnDREB-19	G-Box	CACGTT	736	6	-	Pisum sativum	cis-acting regulatory element involved in light responsiveness	light responsiveness	Light
BnDREB-19	G-box	ACACGTGT	21	8	+	Brassica napus	cis-acting regulatory element involved in light responsiveness	light responsiveness	Light
BnDREB-19	G-box	CACGTG	22	6	+	Arabidopsis thaliana	cis-acting regulatory element involved in light responsiveness	light responsiveness	Light
BnDREB-19	G-box	CACGTC	45	6	-	Zea mays	cis-acting regulatory element involved in light responsiveness	light responsiveness	Light
BnDREB-19	G-box	CACGTG	192	6	+	Arabidopsis thaliana	cis-acting regulatory element involved in light responsiveness	light responsiveness	Light
BnDREB-19	G-box	TACGTG	1448	6	-	Arabidopsis thaliana	cis-acting regulatory element involved in light responsiveness	light responsiveness	Light
BnDREB-2	ACE	GACACGTATG	400	9	+	Petroselinum crispum	cis-acting element involved in light responsiveness	light responsiveness	Light
BnDREB-2	ACE	CTAACGTATT	1044	9	+	Petroselinum crispum	cis-acting element involved in light responsiveness	light responsiveness	Light
BnDREB-2	G-box	TACGTG	1503	6	+	Arabidopsis thaliana	cis-acting regulatory element involved in light responsiveness	light responsiveness	Light
BnDREB-2	G-Box	CACGTT	402	6	+	Pisum sativum	cis-acting regulatory element involved in light responsiveness	light responsiveness	Light
BnDREB-20	ACE	GACACGTATG	902	9	-	Petroselinum crispum	cis-acting element involved in light responsiveness	light responsiveness	Light
BnDREB-20	G-box	TACGTG	904	6	+	Arabidopsis thaliana	cis-acting regulatory element involved in light responsiveness	light responsiveness	Light
BnDREB-21	G-box	ACACGTG(G/t)CACC	849	10.5	+	Lycopersicon esculentum	cis-acting regulatory element involved in light responsiveness	light responsiveness	Light
BnDREB-21	G-Box	CACGTT	1753	6	-	Pisum sativum	cis-acting regulatory element involved in light responsiveness	light responsiveness	Light
BnDREB-3	G-box	TACGTG	208	6	+	Arabidopsis thaliana	cis-acting regulatory element involved in light responsiveness	light responsiveness	Light
BnDREB-3	G-box	CACGTC	792	6	-	Zea mays	cis-acting regulatory element involved in light responsiveness	light responsiveness	Light
BnDREB-3	G-Box	CACGTT	200	6	+	Pisum sativum	cis-acting regulatory element involved in light responsiveness	light responsiveness	Light
BnDREB-4	G-Box	CACGTT	1047	6	+	Pisum sativum	cis-acting regulatory element involved in light responsiveness	light responsiveness	Light
BnDREB-4	G-box	TACGTG	339	6	-	Arabidopsis thaliana	cis-acting regulatory element involved in light responsiveness	light responsiveness	Light
BnDREB-4	G-box	TACGTG	1034	6	+	Arabidopsis thaliana	cis-acting regulatory element involved in light responsiveness	light responsiveness	Light
BnDREB-4	G-box	CACGTC	1089	6	-	Zea mays	cis-acting regulatory element involved in light responsiveness	light responsiveness	Light
BnDREB-4	G-box	TACGTG	1779	6	+	Arabidopsis thaliana	cis-acting regulatory element involved in light responsiveness	light responsiveness	Light
BnDREB-5	G-box	TAACACGTAG	1497	9	+	Brassica oleracea	cis-acting regulatory element involved in light responsiveness	light responsiveness	Light
BnDREB-5	G-box	TACGTG	1500	6	-	Arabidopsis thaliana	cis-acting regulatory element involved in light responsiveness	light responsiveness	Light
BnDREB-6	G-Box	CACGTT	1244	6	+	Pisum sativum	cis-acting regulatory element involved in light responsiveness	light responsiveness	Light
BnDREB-6	G-box	GCCACGTGGA	725	9	+	Arabidopsis thaliana	cis-acting regulatory element involved in light responsiveness	light responsiveness	Light
BnDREB-6	G-box	CACGTC	727	6	-	Zea mays	cis-acting regulatory element involved in light responsiveness	light responsiveness	Light
BnDREB-7	ACE	GACACGTATG	1374	9	-	Petroselinum crispum	cis-acting element involved in light responsiveness	light responsiveness	Light
BnDREB-7	G-Box	CACGTT	1728	6	+	Pisum sativum	cis-acting regulatory element involved in light responsiveness	light responsiveness	Light
BnDREB-7	G-box	TACGTG	888	6	+	Arabidopsis thaliana	cis-acting regulatory element involved in light responsiveness	light responsiveness	Light
BnDREB-7	G-box	TACGTG	1376	6	+	Arabidopsis thaliana	cis-acting regulatory element involved in light responsiveness	light responsiveness	Light
BnDREB-8	G-box	tgACACGTGGCA	268	11	+	Lycopersicon esculentum	cis-acting regulatory element involved in light responsiveness	light responsiveness	Light
BnDREB-8	G-box	ACACGTGT	270	8	+	Brassica napus	cis-acting regulatory element involved in light responsiveness	light responsiveness	Light
BnDREB-8	G-box	CACGTG	271	6	+	Arabidopsis thaliana	cis-acting regulatory element involved in light responsiveness	light responsiveness	Light
BnDREB-8	G-box	ACACGTGT	1049	8	-	Brassica napus	cis-acting regulatory element involved in light responsiveness	light responsiveness	Light
BnDREB-8	G-box	CACGTG	1050	6	-	Arabidopsis thaliana	cis-acting regulatory element involved in light responsiveness	light responsiveness	Light
BnDREB-8	G-box	TACGTG	1135	6	-	Arabidopsis thaliana	cis-acting regulatory element involved in light responsiveness	light responsiveness	Light
BnDREB-8	G-box	ACACGTGT	1155	8	-	Brassica napus	cis-acting regulatory element involved in light responsiveness	light responsiveness	Light
BnDREB-8	G-box	CACGTG	1156	6	-	Arabidopsis thaliana	cis-acting regulatory element involved in light responsiveness	light responsiveness	Light
BnDREB-8	G-box	TACGTG	1566	6	-	Arabidopsis thaliana	cis-acting regulatory element involved in light responsiveness	light responsiveness	Light
BnDREB-8	G-Box	CACGTG	271	6	+	Pisum sativum	cis-acting regulatory element involved in light responsiveness	light responsiveness	Light
BnDREB-8	G-Box	CACGTG	1050	6	-	Pisum sativum	cis-acting regulatory element involved in light responsiveness	light responsiveness	Light
BnDREB-8	G-Box	CACGTG	1156	6	-	Pisum sativum	cis-acting regulatory element involved in light responsiveness	light responsiveness	Light
BnERF-1	ACE	CTAACGTATT	13	9	+	Petroselinum crispum	cis-acting element involved in light responsiveness	light responsiveness	Light
BnERF-1	G-box	TACGTG	951	6	-	Arabidopsis thaliana	cis-acting regulatory element involved in light responsiveness	light responsiveness	Light
BnERF-1	G-box	CACGTC	1670	6	-	Zea mays	cis-acting regulatory element involved in light responsiveness	light responsiveness	Light
BnERF-1	G-box	CACGTG	1694	6	-	Arabidopsis thaliana	cis-acting regulatory element involved in light responsiveness	light responsiveness	Light
BnERF-1	G-Box	CACGTT	757	6	-	Pisum sativum	cis-acting regulatory element involved in light responsiveness	light responsiveness	Light
BnERF-1	G-Box	CACGTG	1694	6	-	Pisum sativum	cis-acting regulatory element involved in light responsiveness	light responsiveness	Light
BnERF-10	ACE	CTAACGTATT	535	9	+	Petroselinum crispum	cis-acting element involved in light responsiveness	light responsiveness	Light
BnERF-10	ACE	CTAACGTATT	1157	10	+	Petroselinum crispum	cis-acting element involved in light responsiveness	light responsiveness	Light
BnERF-11	ACE	GACACGTATG	1240	9	-	Petroselinum crispum	cis-acting element involved in light responsiveness	light responsiveness	Light
BnERF-11	G-box	CACGTG	427	6	+	Arabidopsis thaliana	cis-acting regulatory element involved in light responsiveness	light responsiveness	Light
BnERF-11	G-box	TACGTG	500	6	+	Arabidopsis thaliana	cis-acting regulatory element involved in light responsiveness	light responsiveness	Light
BnERF-11	G-box	TACGTG	1033	6	+	Arabidopsis thaliana	cis-acting regulatory element involved in light responsiveness	light responsiveness	Light
BnERF-11	G-box	TACGTG	1242	6	+	Arabidopsis thaliana	cis-acting regulatory element involved in light responsiveness	light responsiveness	Light
BnERF-11	G-Box	CACGTG	427	6	+	Pisum sativum	cis-acting regulatory element involved in light responsiveness	light responsiveness	Light
BnERF-12	G-box	TACGTG	221	6	-	Arabidopsis thaliana	cis-acting regulatory element involved in light responsiveness	light responsiveness	Light
BnERF-12	G-box	CACGTC	926	6	-	Zea mays	cis-acting regulatory element involved in light responsiveness	light responsiveness	Light
BnERF-12	G-box	TACGTG	1362	6	-	Arabidopsis thaliana	cis-acting regulatory element involved in light responsiveness	light responsiveness	Light
BnERF-12	G-box	CACGTC	1380	6	+	Zea mays	cis-acting regulatory element involved in light responsiveness	light responsiveness	Light
BnERF-12	G-box	CACGTG	1385	6	-	Arabidopsis thaliana	cis-acting regulatory element involved in light responsiveness	light responsiveness	Light
BnERF-12	G-box	CCACGTAA	1606	8	+	Brassica napus	cis-acting regulatory element involved in light responsiveness	light responsiveness	Light
BnERF-12	G-box	TACGTG	1607	6	-	Arabidopsis thaliana	cis-acting regulatory element involved in light responsiveness	light responsiveness	Light
BnERF-12	G-box	ACACGTG(G/t)CACC	1699	10.5	-	Lycopersicon esculentum	cis-acting regulatory element involved in light responsiveness	light responsiveness	Light
BnERF-12	G-box	tgACACGTGGCA	1701	12	-	Lycopersicon esculentum	cis-acting regulatory element involved in light responsiveness	light responsiveness	Light
BnERF-12	G-box	ACACGTGGC	1702	9	-	Brassica napus	cis-acting regulatory element involved in light responsiveness	light responsiveness	Light
BnERF-12	G-box	CACGTG	1704	6	-	Arabidopsis thaliana	cis-acting regulatory element involved in light responsiveness	light responsiveness	Light
BnERF-12	G-box	CACGTG	1799	6	-	Arabidopsis thaliana	cis-acting regulatory element involved in light responsiveness	light responsiveness	Light
BnERF-12	G-box	ACACGTGT	1850	8	-	Brassica napus	cis-acting regulatory element involved in light responsiveness	light responsiveness	Light
BnERF-12	G-box	CACGTG	1851	6	-	Arabidopsis thaliana	cis-acting regulatory element involved in light responsiveness	light responsiveness	Light
BnERF-12	G-Box	CACGTG	1385	6	-	Pisum sativum	cis-acting regulatory element involved in light responsiveness	light responsiveness	Light
BnERF-12	G-Box	CACGTG	1704	6	-	Pisum sativum	cis-acting regulatory element involved in light responsiveness	light responsiveness	Light
BnERF-12	G-Box	CACGTG	1799	6	-	Pisum sativum	cis-acting regulatory element involved in light responsiveness	light responsiveness	Light
BnERF-12	G-Box	CACGTG	1851	6	-	Pisum sativum	cis-acting regulatory element involved in light responsiveness	light responsiveness	Light
BnERF-13	G-Box	CACGTG	1811	6	-	Pisum sativum	cis-acting regulatory element involved in light responsiveness	light responsiveness	Light
BnERF-13	G-box	CACGTG	1811	6	-	Arabidopsis thaliana	cis-acting regulatory element involved in light responsiveness	light responsiveness	Light
BnERF-13	G-box	CACGTC	1859	6	+	Zea mays	cis-acting regulatory element involved in light responsiveness	light responsiveness	Light
BnERF-14	G-Box	CACGTG	1551	6	-	Pisum sativum	cis-acting regulatory element involved in light responsiveness	light responsiveness	Light
BnERF-14	G-box	ACACGTGT	1550	8	-	Brassica napus	cis-acting regulatory element involved in light responsiveness	light responsiveness	Light
BnERF-14	G-box	CACGTG	1551	6	-	Arabidopsis thaliana	cis-acting regulatory element involved in light responsiveness	light responsiveness	Light
BnERF-15	G-box	TACGTG	192	6	-	Arabidopsis thaliana	cis-acting regulatory element involved in light responsiveness	light responsiveness	Light
BnERF-16	ACE	GCGACGTACC	1636	9	+	Petroselinum crispum	cis-acting element involved in light responsiveness	light responsiveness	Light
BnERF-16	G-Box	CACGTT	235	6	-	Pisum sativum	cis-acting regulatory element involved in light responsiveness	light responsiveness	Light
BnERF-17	G-box	CACGAC	1019	6	-	Zea mays	cis-acting regulatory element involved in light responsiveness	light responsiveness	Light
BnERF-18	ACE	GACACGTATG	1056	9	+	Petroselinum crispum	cis-acting element involved in light responsiveness	light responsiveness	Light
BnERF-18	G-box	TAAACGTG	887	8	-	Brassica oleracea	cis-acting regulatory element involved in light responsiveness	light responsiveness	Light
BnERF-18	G-box	TACGTG	1058	6	-	Arabidopsis thaliana	cis-acting regulatory element involved in light responsiveness	light responsiveness	Light
BnERF-18	G-box	TACGTG	1129	6	+	Arabidopsis thaliana	cis-acting regulatory element involved in light responsiveness	light responsiveness	Light
BnERF-18	G-Box	CACGTT	887	6	+	Pisum sativum	cis-acting regulatory element involved in light responsiveness	light responsiveness	Light
BnERF-19	ACE	CTAACGTATT	9	9	-	Petroselinum crispum	cis-acting element involved in light responsiveness	light responsiveness	Light
BnERF-19	ACE	GACACGTATG	175	9	-	Petroselinum crispum	cis-acting element involved in light responsiveness	light responsiveness	Light
BnERF-19	ACE	GACACGTATG	256	9	+	Petroselinum crispum	cis-acting element involved in light responsiveness	light responsiveness	Light
BnERF-19	G-box	TACGTG	177	6	+	Arabidopsis thaliana	cis-acting regulatory element involved in light responsiveness	light responsiveness	Light
BnERF-19	G-box	TACGTG	237	6	+	Arabidopsis thaliana	cis-acting regulatory element involved in light responsiveness	light responsiveness	Light
BnERF-19	G-box	TACGTG	258	6	-	Arabidopsis thaliana	cis-acting regulatory element involved in light responsiveness	light responsiveness	Light
BnERF-19	G-Box	CACGTT	1216	6	+	Pisum sativum	cis-acting regulatory element involved in light responsiveness	light responsiveness	Light
BnERF-2	G-Box	CACGTG	1642	6	-	Pisum sativum	cis-acting regulatory element involved in light responsiveness	light responsiveness	Light
BnERF-2	G-box	CACGTG	1642	6	-	Arabidopsis thaliana	cis-acting regulatory element involved in light responsiveness	light responsiveness	Light
BnERF-20	G-Box	CACGTT	368	6	+	Pisum sativum	cis-acting regulatory element involved in light responsiveness	light responsiveness	Light
BnERF-20	G-Box	CACGTT	1046	6	+	Pisum sativum	cis-acting regulatory element involved in light responsiveness	light responsiveness	Light
BnERF-20	G-Box	CACGTT	1461	6	-	Pisum sativum	cis-acting regulatory element involved in light responsiveness	light responsiveness	Light
BnERF-20	G-Box	CACGTG	1994	6	-	Pisum sativum	cis-acting regulatory element involved in light responsiveness	light responsiveness	Light
BnERF-22	G-box	CACGAC	576	6	-	Zea mays	cis-acting regulatory element involved in light responsiveness	light responsiveness	Light
BnERF-22	G-box	CACGAC	595	6	-	Zea mays	cis-acting regulatory element involved in light responsiveness	light responsiveness	Light
BnERF-24	ACE	CTAACGTATT	36	9	+	Petroselinum crispum	cis-acting element involved in light responsiveness	light responsiveness	Light
BnERF-25	G-Box	CACGTT	1047	6	-	Pisum sativum	cis-acting regulatory element involved in light responsiveness	light responsiveness	Light
BnERF-25	G-box	TAACACGTAG	148	9	-	Brassica oleracea	cis-acting regulatory element involved in light responsiveness	light responsiveness	Light
BnERF-25	G-box	TACGTG	149	6	+	Arabidopsis thaliana	cis-acting regulatory element involved in light responsiveness	light responsiveness	Light
BnERF-25	G-box	TACGTG	219	6	-	Arabidopsis thaliana	cis-acting regulatory element involved in light responsiveness	light responsiveness	Light
BnERF-25	G-box	CACGAC	279	6	-	Zea mays	cis-acting regulatory element involved in light responsiveness	light responsiveness	Light
BnERF-25	G-box	TACGTG	685	6	-	Arabidopsis thaliana	cis-acting regulatory element involved in light responsiveness	light responsiveness	Light
BnERF-25	G-box	TACGTG	1120	6	-	Arabidopsis thaliana	cis-acting regulatory element involved in light responsiveness	light responsiveness	Light
BnERF-26	G-box	ACACGTGGC	48	9	+	Brassica napus	cis-acting regulatory element involved in light responsiveness	light responsiveness	Light
BnERF-26	G-box	CACGTG	49	6	+	Arabidopsis thaliana	cis-acting regulatory element involved in light responsiveness	light responsiveness	Light
BnERF-26	G-box	ACACGTGGC	71	9	+	Brassica napus	cis-acting regulatory element involved in light responsiveness	light responsiveness	Light
BnERF-26	G-box	CACGTG	72	6	+	Arabidopsis thaliana	cis-acting regulatory element involved in light responsiveness	light responsiveness	Light
BnERF-26	G-box	tgACACGTGGCA	493	11	+	Lycopersicon esculentum	cis-acting regulatory element involved in light responsiveness	light responsiveness	Light
BnERF-26	G-box	CACGTC	809	6	+	Zea mays	cis-acting regulatory element involved in light responsiveness	light responsiveness	Light
BnERF-26	G-Box	CACGTT	30	6	-	Pisum sativum	cis-acting regulatory element involved in light responsiveness	light responsiveness	Light
BnERF-26	G-Box	CACGTG	49	6	+	Pisum sativum	cis-acting regulatory element involved in light responsiveness	light responsiveness	Light
BnERF-26	G-Box	CACGTG	72	6	+	Pisum sativum	cis-acting regulatory element involved in light responsiveness	light responsiveness	Light
BnERF-26	G-Box	CACGTT	560	6	+	Pisum sativum	cis-acting regulatory element involved in light responsiveness	light responsiveness	Light
BnERF-27	G-box	ACACGTG(G/t)CACC	862	10.5	-	Lycopersicon esculentum	cis-acting regulatory element involved in light responsiveness	light responsiveness	Light
BnERF-27	G-box	tgACACGTGGCA	864	12	-	Lycopersicon esculentum	cis-acting regulatory element involved in light responsiveness	light responsiveness	Light
BnERF-27	G-box	ACACGTGGC	865	9	-	Brassica napus	cis-acting regulatory element involved in light responsiveness	light responsiveness	Light
BnERF-27	G-box	CACGTG	867	6	+	Arabidopsis thaliana	cis-acting regulatory element involved in light responsiveness	light responsiveness	Light
BnERF-27	G-box	TACGTG	879	6	-	Arabidopsis thaliana	cis-acting regulatory element involved in light responsiveness	light responsiveness	Light
BnERF-27	G-Box	CACGTG	867	6	+	Pisum sativum	cis-acting regulatory element involved in light responsiveness	light responsiveness	Light
BnERF-28	G-box	CACGAC	81	6	+	Zea mays	cis-acting regulatory element involved in light responsiveness	light responsiveness	Light
BnERF-28	G-box	CACGAC	1863	6	-	Zea mays	cis-acting regulatory element involved in light responsiveness	light responsiveness	Light
BnERF-29	G-box	CACGTC	119	6	+	Zea mays	cis-acting regulatory element involved in light responsiveness	light responsiveness	Light
BnERF-29	G-box	GCCACGTGGA	677	9	-	Arabidopsis thaliana	cis-acting regulatory element involved in light responsiveness	light responsiveness	Light
BnERF-29	G-Box	CACGTT	569	6	-	Pisum sativum	cis-acting regulatory element involved in light responsiveness	light responsiveness	Light
BnERF-3	G-box	TAAACGTG	1679	8	+	Brassica oleracea	cis-acting regulatory element involved in light responsiveness	light responsiveness	Light
BnERF-3	G-Box	CACGTT	1200	6	-	Pisum sativum	cis-acting regulatory element involved in light responsiveness	light responsiveness	Light
BnERF-3	G-Box	CACGTT	1681	6	-	Pisum sativum	cis-acting regulatory element involved in light responsiveness	light responsiveness	Light
BnERF-31	G-box	TAACACGTAG	872	9	+	Brassica oleracea	cis-acting regulatory element involved in light responsiveness	light responsiveness	Light
BnERF-31	G-box	CACGTC	1506	6	+	Zea mays	cis-acting regulatory element involved in light responsiveness	light responsiveness	Light
BnERF-32	G-box	CACGTG	738	6	+	Arabidopsis thaliana	cis-acting regulatory element involved in light responsiveness	light responsiveness	Light
BnERF-32	G-box	GCCACGTGGA	840	9	+	Arabidopsis thaliana	cis-acting regulatory element involved in light responsiveness	light responsiveness	Light
BnERF-32	G-box	CACGTG	842	6	+	Arabidopsis thaliana	cis-acting regulatory element involved in light responsiveness	light responsiveness	Light
BnERF-32	G-box	CACGTG	857	6	+	Arabidopsis thaliana	cis-acting regulatory element involved in light responsiveness	light responsiveness	Light
BnERF-32	G-Box	CACGTT	415	6	+	Pisum sativum	cis-acting regulatory element involved in light responsiveness	light responsiveness	Light
BnERF-32	G-Box	CACGTG	738	6	+	Pisum sativum	cis-acting regulatory element involved in light responsiveness	light responsiveness	Light
BnERF-32	G-Box	CACGTG	842	6	+	Pisum sativum	cis-acting regulatory element involved in light responsiveness	light responsiveness	Light
BnERF-32	G-Box	CACGTG	857	6	+	Pisum sativum	cis-acting regulatory element involved in light responsiveness	light responsiveness	Light
BnERF-32	G-Box	CACGTT	1749	6	-	Pisum sativum	cis-acting regulatory element involved in light responsiveness	light responsiveness	Light
BnERF-33	G-box	TAACACGTAG	709	9	+	Brassica oleracea	cis-acting regulatory element involved in light responsiveness	light responsiveness	Light
BnERF-33	G-box	TACGTG	712	6	-	Arabidopsis thaliana	cis-acting regulatory element involved in light responsiveness	light responsiveness	Light
BnERF-33	G-box	CACGTC	1205	6	+	Zea mays	cis-acting regulatory element involved in light responsiveness	light responsiveness	Light
BnERF-34	ACE	CTAACGTATT	1482	9	-	Petroselinum crispum	cis-acting element involved in light responsiveness	light responsiveness	Light
BnERF-34	G-box	CACGTG	1287	6	-	Arabidopsis thaliana	cis-acting regulatory element involved in light responsiveness	light responsiveness	Light
BnERF-34	G-Box	CACGTT	339	6	-	Pisum sativum	cis-acting regulatory element involved in light responsiveness	light responsiveness	Light
BnERF-34	G-Box	CACGTG	1287	6	-	Pisum sativum	cis-acting regulatory element involved in light responsiveness	light responsiveness	Light
BnERF-36	G-box	ACACGTGT	266	8	+	Brassica napus	cis-acting regulatory element involved in light responsiveness	light responsiveness	Light
BnERF-36	G-box	CACGTG	267	6	+	Arabidopsis thaliana	cis-acting regulatory element involved in light responsiveness	light responsiveness	Light
BnERF-36	G-box	ACACGTGT	859	8	+	Brassica napus	cis-acting regulatory element involved in light responsiveness	light responsiveness	Light
BnERF-36	G-box	CACGTG	860	6	+	Arabidopsis thaliana	cis-acting regulatory element involved in light responsiveness	light responsiveness	Light
BnERF-36	G-box	TACGTG	903	6	+	Arabidopsis thaliana	cis-acting regulatory element involved in light responsiveness	light responsiveness	Light
BnERF-36	G-box	ACACGTGT	1278	8	-	Brassica napus	cis-acting regulatory element involved in light responsiveness	light responsiveness	Light
BnERF-36	G-box	CACGTG	1279	6	-	Arabidopsis thaliana	cis-acting regulatory element involved in light responsiveness	light responsiveness	Light
BnERF-36	G-box	GCCACGTGGA	1560	9	-	Arabidopsis thaliana	cis-acting regulatory element involved in light responsiveness	light responsiveness	Light
BnERF-36	G-box	CACGTG	1562	6	-	Arabidopsis thaliana	cis-acting regulatory element involved in light responsiveness	light responsiveness	Light
BnERF-36	G-Box	CACGTG	267	6	+	Pisum sativum	cis-acting regulatory element involved in light responsiveness	light responsiveness	Light
BnERF-36	G-Box	CACGTG	860	6	+	Pisum sativum	cis-acting regulatory element involved in light responsiveness	light responsiveness	Light
BnERF-36	G-Box	CACGTG	1279	6	-	Pisum sativum	cis-acting regulatory element involved in light responsiveness	light responsiveness	Light
BnERF-36	G-Box	CACGTG	1562	6	-	Pisum sativum	cis-acting regulatory element involved in light responsiveness	light responsiveness	Light
BnERF-37	G-box	TACGTG	109	6	-	Arabidopsis thaliana	cis-acting regulatory element involved in light responsiveness	light responsiveness	Light
BnERF-37	G-box	CCACGTAA	1539	8	+	Brassica napus	cis-acting regulatory element involved in light responsiveness	light responsiveness	Light
BnERF-37	G-box	TACGTG	1540	6	-	Arabidopsis thaliana	cis-acting regulatory element involved in light responsiveness	light responsiveness	Light
BnERF-37	G-box	CACGAC	1646	6	+	Zea mays	cis-acting regulatory element involved in light responsiveness	light responsiveness	Light
BnERF-37	G-box	CACGAC	1667	6	+	Zea mays	cis-acting regulatory element involved in light responsiveness	light responsiveness	Light
BnERF-38	ACE	GACACGTATG	1358	9	-	Petroselinum crispum	cis-acting element involved in light responsiveness	light responsiveness	Light
BnERF-38	G-box	tcCACGTGTCACT	484	13	-	Glycine max	cis-acting regulatory element involved in light responsiveness	light responsiveness	Light
BnERF-38	G-box	tgACACGTGGCA	486	11	+	Lycopersicon esculentum	cis-acting regulatory element involved in light responsiveness	light responsiveness	Light
BnERF-38	G-box	GCCACGTGGA	487	9	+	Arabidopsis thaliana	cis-acting regulatory element involved in light responsiveness	light responsiveness	Light
BnERF-38	G-box	CACGTG	489	6	+	Arabidopsis thaliana	cis-acting regulatory element involved in light responsiveness	light responsiveness	Light
BnERF-38	G-box	CACGTC	1605	6	+	Zea mays	cis-acting regulatory element involved in light responsiveness	light responsiveness	Light
BnERF-38	G-Box	CACGTT	102	6	+	Pisum sativum	cis-acting regulatory element involved in light responsiveness	light responsiveness	Light
BnERF-38	G-Box	CACGTG	489	6	+	Pisum sativum	cis-acting regulatory element involved in light responsiveness	light responsiveness	Light
BnERF-38	G-Box	TCCACATGGCA	1596	10	+	Triticum aestivum	cis-acting regulatory element involved in light responsiveness	light responsiveness	Light
BnERF-4	G-Box	CACGTT	1729	6	-	Pisum sativum	cis-acting regulatory element involved in light responsiveness	light responsiveness	Light
BnERF-4	G-box	CACGTC	628	6	-	Zea mays	cis-acting regulatory element involved in light responsiveness	light responsiveness	Light
BnERF-4	G-box	CACGTC	639	6	+	Zea mays	cis-acting regulatory element involved in light responsiveness	light responsiveness	Light
BnERF-4	G-box	TAAACGTG	1727	8	+	Brassica oleracea	cis-acting regulatory element involved in light responsiveness	light responsiveness	Light
BnERF-40	G-Box	CACGTG	446	6	+	Pisum sativum	cis-acting regulatory element involved in light responsiveness	light responsiveness	Light
BnERF-40	G-box	CACGTG	446	6	+	Arabidopsis thaliana	cis-acting regulatory element involved in light responsiveness	light responsiveness	Light
BnERF-40	G-box	TAACACGTAG	960	9	+	Brassica oleracea	cis-acting regulatory element involved in light responsiveness	light responsiveness	Light
BnERF-41	G-Box	CACGTT	1677	6	+	Pisum sativum	cis-acting regulatory element involved in light responsiveness	light responsiveness	Light
BnERF-41	G-box	TAAACGTG	1677	8	-	Brassica oleracea	cis-acting regulatory element involved in light responsiveness	light responsiveness	Light
BnERF-5	G-Box	CACGTT	1615	6	+	Pisum sativum	cis-acting regulatory element involved in light responsiveness	light responsiveness	Light
BnERF-6	G-Box	CACGTG	1630	6	-	Pisum sativum	cis-acting regulatory element involved in light responsiveness	light responsiveness	Light
BnERF-6	G-box	TACGTG	910	6	-	Arabidopsis thaliana	cis-acting regulatory element involved in light responsiveness	light responsiveness	Light
BnERF-6	G-box	CACGTC	1568	6	-	Zea mays	cis-acting regulatory element involved in light responsiveness	light responsiveness	Light
BnERF-6	G-box	CACGTG	1630	6	-	Arabidopsis thaliana	cis-acting regulatory element involved in light responsiveness	light responsiveness	Light
BnERF-7	G-Box	CACGTT	1298	6	-	Pisum sativum	cis-acting regulatory element involved in light responsiveness	light responsiveness	Light
BnERF-7	G-Box	CACGTT	1590	6	-	Pisum sativum	cis-acting regulatory element involved in light responsiveness	light responsiveness	Light
BnERF-7	G-box	CACGTC	1008	6	-	Zea mays	cis-acting regulatory element involved in light responsiveness	light responsiveness	Light
BnERF-8	G-box	CACGTC	363	6	-	Zea mays	cis-acting regulatory element involved in light responsiveness	light responsiveness	Light
BnERF-8	G-box	GCCACGTGGA	1276	9	+	Arabidopsis thaliana	cis-acting regulatory element involved in light responsiveness	light responsiveness	Light
BnERF-8	G-box	CACGTG	1278	6	-	Arabidopsis thaliana	cis-acting regulatory element involved in light responsiveness	light responsiveness	Light
BnERF-8	G-box	ACACGTGGC	1313	9	-	Brassica napus	cis-acting regulatory element involved in light responsiveness	light responsiveness	Light
BnERF-8	G-box	CACGTG	1315	6	-	Arabidopsis thaliana	cis-acting regulatory element involved in light responsiveness	light responsiveness	Light
BnERF-8	G-box	CACGTC	1764	6	+	Zea mays	cis-acting regulatory element involved in light responsiveness	light responsiveness	Light
BnERF-8	G-Box	CACGTG	1278	6	-	Pisum sativum	cis-acting regulatory element involved in light responsiveness	light responsiveness	Light
BnERF-8	G-Box	CACGTG	1315	6	-	Pisum sativum	cis-acting regulatory element involved in light responsiveness	light responsiveness	Light
BnERF-9	G-box	TAACACGTAG	41	9	+	Brassica oleracea	cis-acting regulatory element involved in light responsiveness	light responsiveness	Light
BnERF-9	G-box	TACGTG	44	6	-	Arabidopsis thaliana	cis-acting regulatory element involved in light responsiveness	light responsiveness	Light
BnERF-9	G-box	CACGAC	1017	6	+	Zea mays	cis-acting regulatory element involved in light responsiveness	light responsiveness	Light
BnERF-9	G-box	CACGAC	1378	6	+	Zea mays	cis-acting regulatory element involved in light responsiveness	light responsiveness	Light
BnERF-9	G-box	CACGAC	1399	6	+	Zea mays	cis-acting regulatory element involved in light responsiveness	light responsiveness	Light
BnERF-9	G-box	CACGAC	1404	6	+	Zea mays	cis-acting regulatory element involved in light responsiveness	light responsiveness	Light
BnERF-9	G-box	CACGAC	1478	6	+	Zea mays	cis-acting regulatory element involved in light responsiveness	light responsiveness	Light
BnERF-9	G-box	TACGTG	1833	6	-	Arabidopsis thaliana	cis-acting regulatory element involved in light responsiveness	light responsiveness	Light
BnRAV-2	G-box	TACGTG	308	6	-	Arabidopsis thaliana	cis-acting regulatory element involved in light responsiveness	light responsiveness	Light
BnRAV-2	G-box	TAACACGTAG	1134	9	-	Brassica oleracea	cis-acting regulatory element involved in light responsiveness	light responsiveness	Light
BnRAV-2	G-box	TACGTG	1135	6	+	Arabidopsis thaliana	cis-acting regulatory element involved in light responsiveness	light responsiveness	Light
BnRAV-3	G-box	TACGTG	1513	6	+	Arabidopsis thaliana	cis-acting regulatory element involved in light responsiveness	light responsiveness	Light
BnERF-21	G-Box	CACGTT	1465	6	+	Pisum sativum	cis-acting regulatory element involved in light responsiveness	light responsiveness	Light
BnERF-21	G-box	TAACACGTAG	1462	9	+	Brassica oleracea	cis-acting regulatory element involved in light responsiveness	light responsiveness	Light
BnERF-21	Box 4	ATTAAT	68	6	+	Petroselinum crispum	part of a conserved DNA module involved in light responsiveness	light responsiveness	Light
BnERF-21	chs-CMA1a	TTACTTAA	845	8	-	Daucus carota	part of a light responsive element	light responsiveness	Light
BnERF-21	chs-CMA1a	TTACTTAA	1168	8	+	Daucus carota	part of a light responsive element	light responsiveness	Light
BnERF-21	Gap-box	CAAATGAA(A/G)A	820	9.5	-	Arabidopsis thaliana	part of a light responsive element	light responsiveness	Light
BnERF-21	TCT-motif	TCTTAC	1059	6	-	Arabidopsis thaliana	part of a light responsive element	light responsiveness	Light
BnERF-42	G-box	CACGAC	1430	6	+	Zea mays	cis-acting regulatory element involved in light responsiveness	light responsiveness	Light
BnERF-42	G-box	TACGTG	1554	6	+	Arabidopsis thaliana	cis-acting regulatory element involved in light responsiveness	light responsiveness	Light
BnERF-42	3-AF1 binding site	TAAGAGAGGAA	1989	10	-	Solanum tuberosum	light responsive element	light responsiveness	Light
BnERF-42	GT1-motif	GTGTGTGAA	243	9	+	Solanum tuberosum	light responsive element	light responsiveness	Light
BnERF-42	Box 4	ATTAAT	218	6	+	Petroselinum crispum	part of a conserved DNA module involved in light responsiveness	light responsiveness	Light
BnERF-42	Box 4	ATTAAT	398	6	+	Petroselinum crispum	part of a conserved DNA module involved in light responsiveness	light responsiveness	Light
BnERF-42	Box 4	ATTAAT	582	6	+	Petroselinum crispum	part of a conserved DNA module involved in light responsiveness	light responsiveness	Light
BnERF-42	Box 4	ATTAAT	1681	6	-	Petroselinum crispum	part of a conserved DNA module involved in light responsiveness	light responsiveness	Light
BnERF-42	GATA-motif	AAGATAAGATT	1022	10	-	Arabidopsis thaliana	part of a light responsive element	light responsiveness	Light
BnERF-42	TCT-motif	TCTTAC	1439	6	-	Arabidopsis thaliana	part of a light responsive element	light responsiveness	Light
BnAP2-14	LTR	CCGAAA	559	6	-	Hordeum vulgare	cis-acting element involved in low-temperature responsiveness	low-temperature responsiveness	Stress
BnAP2-15	LTR	CCGAAA	1441	6	+	Hordeum vulgare	cis-acting element involved in low-temperature responsiveness	low-temperature responsiveness	Stress
BnAP2-17	LTR	CCGAAA	594	6	-	Hordeum vulgare	cis-acting element involved in low-temperature responsiveness	low-temperature responsiveness	Stress
BnAP2-18	LTR	CCGAAA	607	6	-	Hordeum vulgare	cis-acting element involved in low-temperature responsiveness	low-temperature responsiveness	Stress
BnAP2-18	LTR	CCGAAA	853	6	+	Hordeum vulgare	cis-acting element involved in low-temperature responsiveness	low-temperature responsiveness	Stress
BnAP2-18	LTR	CCGAAA	909	6	+	Hordeum vulgare	cis-acting element involved in low-temperature responsiveness	low-temperature responsiveness	Stress
BnAP2-3	LTR	CCGAAA	1651	6	-	Hordeum vulgare	cis-acting element involved in low-temperature responsiveness	low-temperature responsiveness	Stress
BnAP2-4	LTR	CCGAAA	756	6	+	Hordeum vulgare	cis-acting element involved in low-temperature responsiveness	low-temperature responsiveness	Stress
BnAP2-4	LTR	CCGAAA	993	6	-	Hordeum vulgare	cis-acting element involved in low-temperature responsiveness	low-temperature responsiveness	Stress
BnAP2-5	LTR	CCGAAA	589	6	+	Hordeum vulgare	cis-acting element involved in low-temperature responsiveness	low-temperature responsiveness	Stress
BnAP2-6	LTR	CCGAAA	589	6	+	Hordeum vulgare	cis-acting element involved in low-temperature responsiveness	low-temperature responsiveness	Stress
BnAP2-8	LTR	CCGAAA	781	6	-	Hordeum vulgare	cis-acting element involved in low-temperature responsiveness	low-temperature responsiveness	Stress
BnAP2-9	LTR	CCGAAA	1716	6	-	Hordeum vulgare	cis-acting element involved in low-temperature responsiveness	low-temperature responsiveness	Stress
BnDREB-1	LTR	CCGAAA	86	6	-	Hordeum vulgare	cis-acting element involved in low-temperature responsiveness	low-temperature responsiveness	Stress
BnDREB-12	LTR	CCGAAA	527	6	-	Hordeum vulgare	cis-acting element involved in low-temperature responsiveness	low-temperature responsiveness	Stress
BnDREB-12	LTR	CCGAAA	1988	6	-	Hordeum vulgare	cis-acting element involved in low-temperature responsiveness	low-temperature responsiveness	Stress
BnDREB-18	LTR	CCGAAA	516	6	-	Hordeum vulgare	cis-acting element involved in low-temperature responsiveness	low-temperature responsiveness	Stress
BnDREB-18	LTR	CCGAAA	1642	6	-	Hordeum vulgare	cis-acting element involved in low-temperature responsiveness	low-temperature responsiveness	Stress
BnDREB-19	LTR	CCGAAA	555	6	+	Hordeum vulgare	cis-acting element involved in low-temperature responsiveness	low-temperature responsiveness	Stress
BnDREB-19	LTR	CCGAAA	1815	6	-	Hordeum vulgare	cis-acting element involved in low-temperature responsiveness	low-temperature responsiveness	Stress
BnDREB-2	LTR	CCGAAA	838	6	-	Hordeum vulgare	cis-acting element involved in low-temperature responsiveness	low-temperature responsiveness	Stress
BnDREB-2	LTR	CCGAAA	1644	6	+	Hordeum vulgare	cis-acting element involved in low-temperature responsiveness	low-temperature responsiveness	Stress
BnDREB-3	LTR	CCGAAA	581	6	+	Hordeum vulgare	cis-acting element involved in low-temperature responsiveness	low-temperature responsiveness	Stress
BnDREB-4	LTR	CCGAAA	1233	6	-	Hordeum vulgare	cis-acting element involved in low-temperature responsiveness	low-temperature responsiveness	Stress
BnDREB-6	LTR	CCGAAA	74	6	-	Hordeum vulgare	cis-acting element involved in low-temperature responsiveness	low-temperature responsiveness	Stress
BnDREB-9	LTR	CCGAAA	361	6	+	Hordeum vulgare	cis-acting element involved in low-temperature responsiveness	low-temperature responsiveness	Stress
BnERF-12	LTR	CCGAAA	1620	6	+	Hordeum vulgare	cis-acting element involved in low-temperature responsiveness	low-temperature responsiveness	Stress
BnERF-12	LTR	CCGAAA	1666	6	+	Hordeum vulgare	cis-acting element involved in low-temperature responsiveness	low-temperature responsiveness	Stress
BnERF-12	LTR	CCGAAA	1730	6	+	Hordeum vulgare	cis-acting element involved in low-temperature responsiveness	low-temperature responsiveness	Stress
BnERF-14	LTR	CCGAAA	1338	6	+	Hordeum vulgare	cis-acting element involved in low-temperature responsiveness	low-temperature responsiveness	Stress
BnERF-14	LTR	CCGAAA	1693	6	-	Hordeum vulgare	cis-acting element involved in low-temperature responsiveness	low-temperature responsiveness	Stress
BnERF-17	LTR	CCGAAA	1505	6	-	Hordeum vulgare	cis-acting element involved in low-temperature responsiveness	low-temperature responsiveness	Stress
BnERF-24	LTR	CCGAAA	1038	6	+	Hordeum vulgare	cis-acting element involved in low-temperature responsiveness	low-temperature responsiveness	Stress
BnERF-25	LTR	CCGAAA	141	6	+	Hordeum vulgare	cis-acting element involved in low-temperature responsiveness	low-temperature responsiveness	Stress
BnERF-25	LTR	CCGAAA	1975	6	+	Hordeum vulgare	cis-acting element involved in low-temperature responsiveness	low-temperature responsiveness	Stress
BnERF-26	LTR	CCGAAA	1509	6	+	Hordeum vulgare	cis-acting element involved in low-temperature responsiveness	low-temperature responsiveness	Stress
BnERF-28	LTR	CCGAAA	835	6	-	Hordeum vulgare	cis-acting element involved in low-temperature responsiveness	low-temperature responsiveness	Stress
BnERF-28	LTR	CCGAAA	1625	6	-	Hordeum vulgare	cis-acting element involved in low-temperature responsiveness	low-temperature responsiveness	Stress
BnERF-3	LTR	CCGAAA	440	6	-	Hordeum vulgare	cis-acting element involved in low-temperature responsiveness	low-temperature responsiveness	Stress
BnERF-31	LTR	CCGAAA	357	6	+	Hordeum vulgare	cis-acting element involved in low-temperature responsiveness	low-temperature responsiveness	Stress
BnERF-31	LTR	CCGAAA	1736	6	+	Hordeum vulgare	cis-acting element involved in low-temperature responsiveness	low-temperature responsiveness	Stress
BnERF-32	LTR	CCGAAA	1049	6	-	Hordeum vulgare	cis-acting element involved in low-temperature responsiveness	low-temperature responsiveness	Stress
BnERF-38	LTR	CCGAAA	1578	6	-	Hordeum vulgare	cis-acting element involved in low-temperature responsiveness	low-temperature responsiveness	Stress
BnERF-39	LTR	CCGAAA	1994	6	-	Hordeum vulgare	cis-acting element involved in low-temperature responsiveness	low-temperature responsiveness	Stress
BnERF-4	LTR	CCGAAA	837	6	+	Hordeum vulgare	cis-acting element involved in low-temperature responsiveness	low-temperature responsiveness	Stress
BnERF-4	LTR	CCGAAA	1498	6	+	Hordeum vulgare	cis-acting element involved in low-temperature responsiveness	low-temperature responsiveness	Stress
BnERF-6	LTR	CCGAAA	587	6	+	Hordeum vulgare	cis-acting element involved in low-temperature responsiveness	low-temperature responsiveness	Stress
BnERF-7	LTR	CCGAAA	196	6	+	Hordeum vulgare	cis-acting element involved in low-temperature responsiveness	low-temperature responsiveness	Stress
BnRAV-2	LTR	CCGAAA	1615	6	-	Hordeum vulgare	cis-acting element involved in low-temperature responsiveness	low-temperature responsiveness	Stress
BnAP2-1	TGACG-motif	TGACG	3	5	+	Hordeum vulgare	cis-acting regulatory element involved in the MeJA-responsiveness	MeJA-responsiveness	Hormone
BnAP2-1	TGACG-motif	TGACG	633	5	+	Hordeum vulgare	cis-acting regulatory element involved in the MeJA-responsiveness	MeJA-responsiveness	Hormone
BnAP2-1	TGACG-motif	TGACG	1893	5	+	Hordeum vulgare	cis-acting regulatory element involved in the MeJA-responsiveness	MeJA-responsiveness	Hormone
BnAP2-1	CGTCA-motif	CGTCA	3	5	-	Hordeum vulgare	cis-acting regulatory element involved in the MeJA-responsiveness	MeJA-responsiveness	Hormone
BnAP2-1	CGTCA-motif	CGTCA	633	5	-	Hordeum vulgare	cis-acting regulatory element involved in the MeJA-responsiveness	MeJA-responsiveness	Hormone
BnAP2-1	CGTCA-motif	CGTCA	1893	5	-	Hordeum vulgare	cis-acting regulatory element involved in the MeJA-responsiveness	MeJA-responsiveness	Hormone
BnAP2-10	CGTCA-motif	CGTCA	314	5	-	Hordeum vulgare	cis-acting regulatory element involved in the MeJA-responsiveness	MeJA-responsiveness	Hormone
BnAP2-10	TGACG-motif	TGACG	314	5	+	Hordeum vulgare	cis-acting regulatory element involved in the MeJA-responsiveness	MeJA-responsiveness	Hormone
BnAP2-12	TGACG-motif	TGACG	517	5	+	Hordeum vulgare	cis-acting regulatory element involved in the MeJA-responsiveness	MeJA-responsiveness	Hormone
BnAP2-12	TGACG-motif	TGACG	1185	5	-	Hordeum vulgare	cis-acting regulatory element involved in the MeJA-responsiveness	MeJA-responsiveness	Hormone
BnAP2-12	CGTCA-motif	CGTCA	517	5	-	Hordeum vulgare	cis-acting regulatory element involved in the MeJA-responsiveness	MeJA-responsiveness	Hormone
BnAP2-12	CGTCA-motif	CGTCA	1185	5	+	Hordeum vulgare	cis-acting regulatory element involved in the MeJA-responsiveness	MeJA-responsiveness	Hormone
BnAP2-13	TGACG-motif	TGACG	628	5	+	Hordeum vulgare	cis-acting regulatory element involved in the MeJA-responsiveness	MeJA-responsiveness	Hormone
BnAP2-13	CGTCA-motif	CGTCA	628	5	-	Hordeum vulgare	cis-acting regulatory element involved in the MeJA-responsiveness	MeJA-responsiveness	Hormone
BnAP2-16	TGACG-motif	TGACG	1552	5	-	Hordeum vulgare	cis-acting regulatory element involved in the MeJA-responsiveness	MeJA-responsiveness	Hormone
BnAP2-16	CGTCA-motif	CGTCA	1552	5	+	Hordeum vulgare	cis-acting regulatory element involved in the MeJA-responsiveness	MeJA-responsiveness	Hormone
BnAP2-17	TGACG-motif	TGACG	816	5	-	Hordeum vulgare	cis-acting regulatory element involved in the MeJA-responsiveness	MeJA-responsiveness	Hormone
BnAP2-17	TGACG-motif	TGACG	951	5	-	Hordeum vulgare	cis-acting regulatory element involved in the MeJA-responsiveness	MeJA-responsiveness	Hormone
BnAP2-17	TGACG-motif	TGACG	1212	5	-	Hordeum vulgare	cis-acting regulatory element involved in the MeJA-responsiveness	MeJA-responsiveness	Hormone
BnAP2-17	TGACG-motif	TGACG	1607	5	+	Hordeum vulgare	cis-acting regulatory element involved in the MeJA-responsiveness	MeJA-responsiveness	Hormone
BnAP2-17	CGTCA-motif	CGTCA	816	5	+	Hordeum vulgare	cis-acting regulatory element involved in the MeJA-responsiveness	MeJA-responsiveness	Hormone
BnAP2-17	CGTCA-motif	CGTCA	951	5	+	Hordeum vulgare	cis-acting regulatory element involved in the MeJA-responsiveness	MeJA-responsiveness	Hormone
BnAP2-17	CGTCA-motif	CGTCA	1212	5	+	Hordeum vulgare	cis-acting regulatory element involved in the MeJA-responsiveness	MeJA-responsiveness	Hormone
BnAP2-17	CGTCA-motif	CGTCA	1607	5	-	Hordeum vulgare	cis-acting regulatory element involved in the MeJA-responsiveness	MeJA-responsiveness	Hormone
BnAP2-2	TGACG-motif	TGACG	824	5	+	Hordeum vulgare	cis-acting regulatory element involved in the MeJA-responsiveness	MeJA-responsiveness	Hormone
BnAP2-2	CGTCA-motif	CGTCA	824	5	-	Hordeum vulgare	cis-acting regulatory element involved in the MeJA-responsiveness	MeJA-responsiveness	Hormone
BnAP2-3	CGTCA-motif	CGTCA	488	5	+	Hordeum vulgare	cis-acting regulatory element involved in the MeJA-responsiveness	MeJA-responsiveness	Hormone
BnAP2-3	CGTCA-motif	CGTCA	529	5	-	Hordeum vulgare	cis-acting regulatory element involved in the MeJA-responsiveness	MeJA-responsiveness	Hormone
BnAP2-3	CGTCA-motif	CGTCA	1022	5	+	Hordeum vulgare	cis-acting regulatory element involved in the MeJA-responsiveness	MeJA-responsiveness	Hormone
BnAP2-3	CGTCA-motif	CGTCA	1907	5	+	Hordeum vulgare	cis-acting regulatory element involved in the MeJA-responsiveness	MeJA-responsiveness	Hormone
BnAP2-3	TGACG-motif	TGACG	488	5	-	Hordeum vulgare	cis-acting regulatory element involved in the MeJA-responsiveness	MeJA-responsiveness	Hormone
BnAP2-3	TGACG-motif	TGACG	529	5	+	Hordeum vulgare	cis-acting regulatory element involved in the MeJA-responsiveness	MeJA-responsiveness	Hormone
BnAP2-3	TGACG-motif	TGACG	1022	5	-	Hordeum vulgare	cis-acting regulatory element involved in the MeJA-responsiveness	MeJA-responsiveness	Hormone
BnAP2-3	TGACG-motif	TGACG	1907	5	-	Hordeum vulgare	cis-acting regulatory element involved in the MeJA-responsiveness	MeJA-responsiveness	Hormone
BnAP2-5	CGTCA-motif	CGTCA	1114	5	-	Hordeum vulgare	cis-acting regulatory element involved in the MeJA-responsiveness	MeJA-responsiveness	Hormone
BnAP2-5	TGACG-motif	TGACG	1114	5	+	Hordeum vulgare	cis-acting regulatory element involved in the MeJA-responsiveness	MeJA-responsiveness	Hormone
BnAP2-6	TGACG-motif	TGACG	1114	5	+	Hordeum vulgare	cis-acting regulatory element involved in the MeJA-responsiveness	MeJA-responsiveness	Hormone
BnAP2-6	CGTCA-motif	CGTCA	1114	5	-	Hordeum vulgare	cis-acting regulatory element involved in the MeJA-responsiveness	MeJA-responsiveness	Hormone
BnAP2-8	CGTCA-motif	CGTCA	1759	5	-	Hordeum vulgare	cis-acting regulatory element involved in the MeJA-responsiveness	MeJA-responsiveness	Hormone
BnAP2-8	TGACG-motif	TGACG	1759	5	+	Hordeum vulgare	cis-acting regulatory element involved in the MeJA-responsiveness	MeJA-responsiveness	Hormone
BnAP2-9	CGTCA-motif	CGTCA	551	5	+	Hordeum vulgare	cis-acting regulatory element involved in the MeJA-responsiveness	MeJA-responsiveness	Hormone
BnAP2-9	TGACG-motif	TGACG	551	5	-	Hordeum vulgare	cis-acting regulatory element involved in the MeJA-responsiveness	MeJA-responsiveness	Hormone
BnDREB-1	TGACG-motif	TGACG	528	5	-	Hordeum vulgare	cis-acting regulatory element involved in the MeJA-responsiveness	MeJA-responsiveness	Hormone
BnDREB-1	TGACG-motif	TGACG	1379	5	+	Hordeum vulgare	cis-acting regulatory element involved in the MeJA-responsiveness	MeJA-responsiveness	Hormone
BnDREB-1	CGTCA-motif	CGTCA	528	5	+	Hordeum vulgare	cis-acting regulatory element involved in the MeJA-responsiveness	MeJA-responsiveness	Hormone
BnDREB-1	CGTCA-motif	CGTCA	1379	5	-	Hordeum vulgare	cis-acting regulatory element involved in the MeJA-responsiveness	MeJA-responsiveness	Hormone
BnDREB-11	TGACG-motif	TGACG	1214	5	-	Hordeum vulgare	cis-acting regulatory element involved in the MeJA-responsiveness	MeJA-responsiveness	Hormone
BnDREB-11	TGACG-motif	TGACG	1914	5	+	Hordeum vulgare	cis-acting regulatory element involved in the MeJA-responsiveness	MeJA-responsiveness	Hormone
BnDREB-11	CGTCA-motif	CGTCA	1214	5	+	Hordeum vulgare	cis-acting regulatory element involved in the MeJA-responsiveness	MeJA-responsiveness	Hormone
BnDREB-11	CGTCA-motif	CGTCA	1914	5	-	Hordeum vulgare	cis-acting regulatory element involved in the MeJA-responsiveness	MeJA-responsiveness	Hormone
BnDREB-13	CGTCA-motif	CGTCA	311	5	-	Hordeum vulgare	cis-acting regulatory element involved in the MeJA-responsiveness	MeJA-responsiveness	Hormone
BnDREB-13	TGACG-motif	TGACG	311	5	+	Hordeum vulgare	cis-acting regulatory element involved in the MeJA-responsiveness	MeJA-responsiveness	Hormone
BnDREB-14	CGTCA-motif	CGTCA	198	5	+	Hordeum vulgare	cis-acting regulatory element involved in the MeJA-responsiveness	MeJA-responsiveness	Hormone
BnDREB-14	CGTCA-motif	CGTCA	1143	5	-	Hordeum vulgare	cis-acting regulatory element involved in the MeJA-responsiveness	MeJA-responsiveness	Hormone
BnDREB-14	CGTCA-motif	CGTCA	1238	5	+	Hordeum vulgare	cis-acting regulatory element involved in the MeJA-responsiveness	MeJA-responsiveness	Hormone
BnDREB-14	TGACG-motif	TGACG	198	5	-	Hordeum vulgare	cis-acting regulatory element involved in the MeJA-responsiveness	MeJA-responsiveness	Hormone
BnDREB-14	TGACG-motif	TGACG	1143	5	+	Hordeum vulgare	cis-acting regulatory element involved in the MeJA-responsiveness	MeJA-responsiveness	Hormone
BnDREB-14	TGACG-motif	TGACG	1238	5	-	Hordeum vulgare	cis-acting regulatory element involved in the MeJA-responsiveness	MeJA-responsiveness	Hormone
BnDREB-15	TGACG-motif	TGACG	56	5	+	Hordeum vulgare	cis-acting regulatory element involved in the MeJA-responsiveness	MeJA-responsiveness	Hormone
BnDREB-15	TGACG-motif	TGACG	681	5	+	Hordeum vulgare	cis-acting regulatory element involved in the MeJA-responsiveness	MeJA-responsiveness	Hormone
BnDREB-15	TGACG-motif	TGACG	1417	5	-	Hordeum vulgare	cis-acting regulatory element involved in the MeJA-responsiveness	MeJA-responsiveness	Hormone
BnDREB-15	CGTCA-motif	CGTCA	56	5	-	Hordeum vulgare	cis-acting regulatory element involved in the MeJA-responsiveness	MeJA-responsiveness	Hormone
BnDREB-15	CGTCA-motif	CGTCA	681	5	-	Hordeum vulgare	cis-acting regulatory element involved in the MeJA-responsiveness	MeJA-responsiveness	Hormone
BnDREB-15	CGTCA-motif	CGTCA	1417	5	+	Hordeum vulgare	cis-acting regulatory element involved in the MeJA-responsiveness	MeJA-responsiveness	Hormone
BnDREB-16	CGTCA-motif	CGTCA	1484	5	-	Hordeum vulgare	cis-acting regulatory element involved in the MeJA-responsiveness	MeJA-responsiveness	Hormone
BnDREB-16	TGACG-motif	TGACG	1484	5	+	Hordeum vulgare	cis-acting regulatory element involved in the MeJA-responsiveness	MeJA-responsiveness	Hormone
BnDREB-17	CGTCA-motif	CGTCA	607	5	-	Hordeum vulgare	cis-acting regulatory element involved in the MeJA-responsiveness	MeJA-responsiveness	Hormone
BnDREB-17	TGACG-motif	TGACG	607	5	+	Hordeum vulgare	cis-acting regulatory element involved in the MeJA-responsiveness	MeJA-responsiveness	Hormone
BnDREB-18	CGTCA-motif	CGTCA	1491	5	-	Hordeum vulgare	cis-acting regulatory element involved in the MeJA-responsiveness	MeJA-responsiveness	Hormone
BnDREB-18	TGACG-motif	TGACG	1491	5	+	Hordeum vulgare	cis-acting regulatory element involved in the MeJA-responsiveness	MeJA-responsiveness	Hormone
BnDREB-19	TGACG-motif	TGACG	44	5	+	Hordeum vulgare	cis-acting regulatory element involved in the MeJA-responsiveness	MeJA-responsiveness	Hormone
BnDREB-19	TGACG-motif	TGACG	1822	5	+	Hordeum vulgare	cis-acting regulatory element involved in the MeJA-responsiveness	MeJA-responsiveness	Hormone
BnDREB-19	CGTCA-motif	CGTCA	44	5	-	Hordeum vulgare	cis-acting regulatory element involved in the MeJA-responsiveness	MeJA-responsiveness	Hormone
BnDREB-19	CGTCA-motif	CGTCA	1822	5	-	Hordeum vulgare	cis-acting regulatory element involved in the MeJA-responsiveness	MeJA-responsiveness	Hormone
BnDREB-2	CGTCA-motif	CGTCA	824	5	-	Hordeum vulgare	cis-acting regulatory element involved in the MeJA-responsiveness	MeJA-responsiveness	Hormone
BnDREB-2	TGACG-motif	TGACG	824	5	+	Hordeum vulgare	cis-acting regulatory element involved in the MeJA-responsiveness	MeJA-responsiveness	Hormone
BnDREB-20	TGACG-motif	TGACG	1790	5	+	Hordeum vulgare	cis-acting regulatory element involved in the MeJA-responsiveness	MeJA-responsiveness	Hormone
BnDREB-20	CGTCA-motif	CGTCA	1790	5	-	Hordeum vulgare	cis-acting regulatory element involved in the MeJA-responsiveness	MeJA-responsiveness	Hormone
BnDREB-21	TGACG-motif	TGACG	1427	5	+	Hordeum vulgare	cis-acting regulatory element involved in the MeJA-responsiveness	MeJA-responsiveness	Hormone
BnDREB-21	CGTCA-motif	CGTCA	1427	5	-	Hordeum vulgare	cis-acting regulatory element involved in the MeJA-responsiveness	MeJA-responsiveness	Hormone
BnDREB-4	CGTCA-motif	CGTCA	280	5	+	Hordeum vulgare	cis-acting regulatory element involved in the MeJA-responsiveness	MeJA-responsiveness	Hormone
BnDREB-4	CGTCA-motif	CGTCA	1088	5	-	Hordeum vulgare	cis-acting regulatory element involved in the MeJA-responsiveness	MeJA-responsiveness	Hormone
BnDREB-4	CGTCA-motif	CGTCA	1304	5	+	Hordeum vulgare	cis-acting regulatory element involved in the MeJA-responsiveness	MeJA-responsiveness	Hormone
BnDREB-4	TGACG-motif	TGACG	280	5	-	Hordeum vulgare	cis-acting regulatory element involved in the MeJA-responsiveness	MeJA-responsiveness	Hormone
BnDREB-4	TGACG-motif	TGACG	1088	5	+	Hordeum vulgare	cis-acting regulatory element involved in the MeJA-responsiveness	MeJA-responsiveness	Hormone
BnDREB-4	TGACG-motif	TGACG	1304	5	-	Hordeum vulgare	cis-acting regulatory element involved in the MeJA-responsiveness	MeJA-responsiveness	Hormone
BnDREB-5	CGTCA-motif	CGTCA	763	5	-	Hordeum vulgare	cis-acting regulatory element involved in the MeJA-responsiveness	MeJA-responsiveness	Hormone
BnDREB-5	TGACG-motif	TGACG	763	5	+	Hordeum vulgare	cis-acting regulatory element involved in the MeJA-responsiveness	MeJA-responsiveness	Hormone
BnDREB-7	CGTCA-motif	CGTCA	1349	5	+	Hordeum vulgare	cis-acting regulatory element involved in the MeJA-responsiveness	MeJA-responsiveness	Hormone
BnDREB-7	TGACG-motif	TGACG	1349	5	-	Hordeum vulgare	cis-acting regulatory element involved in the MeJA-responsiveness	MeJA-responsiveness	Hormone
BnERF-1	TGACG-motif	TGACG	859	5	+	Hordeum vulgare	cis-acting regulatory element involved in the MeJA-responsiveness	MeJA-responsiveness	Hormone
BnERF-1	TGACG-motif	TGACG	1201	5	+	Hordeum vulgare	cis-acting regulatory element involved in the MeJA-responsiveness	MeJA-responsiveness	Hormone
BnERF-1	TGACG-motif	TGACG	1831	5	-	Hordeum vulgare	cis-acting regulatory element involved in the MeJA-responsiveness	MeJA-responsiveness	Hormone
BnERF-1	CGTCA-motif	CGTCA	859	5	-	Hordeum vulgare	cis-acting regulatory element involved in the MeJA-responsiveness	MeJA-responsiveness	Hormone
BnERF-1	CGTCA-motif	CGTCA	1201	5	-	Hordeum vulgare	cis-acting regulatory element involved in the MeJA-responsiveness	MeJA-responsiveness	Hormone
BnERF-1	CGTCA-motif	CGTCA	1831	5	+	Hordeum vulgare	cis-acting regulatory element involved in the MeJA-responsiveness	MeJA-responsiveness	Hormone
BnERF-10	CGTCA-motif	CGTCA	64	5	+	Hordeum vulgare	cis-acting regulatory element involved in the MeJA-responsiveness	MeJA-responsiveness	Hormone
BnERF-10	CGTCA-motif	CGTCA	1805	5	+	Hordeum vulgare	cis-acting regulatory element involved in the MeJA-responsiveness	MeJA-responsiveness	Hormone
BnERF-10	TGACG-motif	TGACG	64	5	-	Hordeum vulgare	cis-acting regulatory element involved in the MeJA-responsiveness	MeJA-responsiveness	Hormone
BnERF-10	TGACG-motif	TGACG	1805	5	-	Hordeum vulgare	cis-acting regulatory element involved in the MeJA-responsiveness	MeJA-responsiveness	Hormone
BnERF-12	CGTCA-motif	CGTCA	1382	5	+	Hordeum vulgare	cis-acting regulatory element involved in the MeJA-responsiveness	MeJA-responsiveness	Hormone
BnERF-12	CGTCA-motif	CGTCA	1718	5	-	Hordeum vulgare	cis-acting regulatory element involved in the MeJA-responsiveness	MeJA-responsiveness	Hormone
BnERF-12	TGACG-motif	TGACG	1382	5	-	Hordeum vulgare	cis-acting regulatory element involved in the MeJA-responsiveness	MeJA-responsiveness	Hormone
BnERF-12	TGACG-motif	TGACG	1718	5	+	Hordeum vulgare	cis-acting regulatory element involved in the MeJA-responsiveness	MeJA-responsiveness	Hormone
BnERF-13	CGTCA-motif	CGTCA	1000	5	+	Hordeum vulgare	cis-acting regulatory element involved in the MeJA-responsiveness	MeJA-responsiveness	Hormone
BnERF-13	CGTCA-motif	CGTCA	1650	5	-	Hordeum vulgare	cis-acting regulatory element involved in the MeJA-responsiveness	MeJA-responsiveness	Hormone
BnERF-13	CGTCA-motif	CGTCA	1861	5	+	Hordeum vulgare	cis-acting regulatory element involved in the MeJA-responsiveness	MeJA-responsiveness	Hormone
BnERF-13	TGACG-motif	TGACG	1000	5	-	Hordeum vulgare	cis-acting regulatory element involved in the MeJA-responsiveness	MeJA-responsiveness	Hormone
BnERF-13	TGACG-motif	TGACG	1650	5	+	Hordeum vulgare	cis-acting regulatory element involved in the MeJA-responsiveness	MeJA-responsiveness	Hormone
BnERF-13	TGACG-motif	TGACG	1861	5	-	Hordeum vulgare	cis-acting regulatory element involved in the MeJA-responsiveness	MeJA-responsiveness	Hormone
BnERF-14	TGACG-motif	TGACG	121	5	-	Hordeum vulgare	cis-acting regulatory element involved in the MeJA-responsiveness	MeJA-responsiveness	Hormone
BnERF-14	CGTCA-motif	CGTCA	121	5	+	Hordeum vulgare	cis-acting regulatory element involved in the MeJA-responsiveness	MeJA-responsiveness	Hormone
BnERF-15	TGACG-motif	TGACG	934	5	-	Hordeum vulgare	cis-acting regulatory element involved in the MeJA-responsiveness	MeJA-responsiveness	Hormone
BnERF-15	CGTCA-motif	CGTCA	934	5	+	Hordeum vulgare	cis-acting regulatory element involved in the MeJA-responsiveness	MeJA-responsiveness	Hormone
BnERF-16	TGACG-motif	TGACG	777	5	-	Hordeum vulgare	cis-acting regulatory element involved in the MeJA-responsiveness	MeJA-responsiveness	Hormone
BnERF-16	TGACG-motif	TGACG	1994	5	-	Hordeum vulgare	cis-acting regulatory element involved in the MeJA-responsiveness	MeJA-responsiveness	Hormone
BnERF-16	CGTCA-motif	CGTCA	777	5	+	Hordeum vulgare	cis-acting regulatory element involved in the MeJA-responsiveness	MeJA-responsiveness	Hormone
BnERF-16	CGTCA-motif	CGTCA	1994	5	+	Hordeum vulgare	cis-acting regulatory element involved in the MeJA-responsiveness	MeJA-responsiveness	Hormone
BnERF-17	CGTCA-motif	CGTCA	256	5	-	Hordeum vulgare	cis-acting regulatory element involved in the MeJA-responsiveness	MeJA-responsiveness	Hormone
BnERF-17	CGTCA-motif	CGTCA	1442	5	+	Hordeum vulgare	cis-acting regulatory element involved in the MeJA-responsiveness	MeJA-responsiveness	Hormone
BnERF-17	TGACG-motif	TGACG	256	5	+	Hordeum vulgare	cis-acting regulatory element involved in the MeJA-responsiveness	MeJA-responsiveness	Hormone
BnERF-17	TGACG-motif	TGACG	1442	5	-	Hordeum vulgare	cis-acting regulatory element involved in the MeJA-responsiveness	MeJA-responsiveness	Hormone
BnERF-18	CGTCA-motif	CGTCA	63	5	+	Hordeum vulgare	cis-acting regulatory element involved in the MeJA-responsiveness	MeJA-responsiveness	Hormone
BnERF-18	TGACG-motif	TGACG	63	5	-	Hordeum vulgare	cis-acting regulatory element involved in the MeJA-responsiveness	MeJA-responsiveness	Hormone
BnERF-19	CGTCA-motif	CGTCA	1880	5	+	Hordeum vulgare	cis-acting regulatory element involved in the MeJA-responsiveness	MeJA-responsiveness	Hormone
BnERF-19	TGACG-motif	TGACG	1880	5	-	Hordeum vulgare	cis-acting regulatory element involved in the MeJA-responsiveness	MeJA-responsiveness	Hormone
BnERF-2	CGTCA-motif	CGTCA	1596	5	+	Hordeum vulgare	cis-acting regulatory element involved in the MeJA-responsiveness	MeJA-responsiveness	Hormone
BnERF-2	CGTCA-motif	CGTCA	1607	5	-	Hordeum vulgare	cis-acting regulatory element involved in the MeJA-responsiveness	MeJA-responsiveness	Hormone
BnERF-2	TGACG-motif	TGACG	1596	5	-	Hordeum vulgare	cis-acting regulatory element involved in the MeJA-responsiveness	MeJA-responsiveness	Hormone
BnERF-2	TGACG-motif	TGACG	1607	5	+	Hordeum vulgare	cis-acting regulatory element involved in the MeJA-responsiveness	MeJA-responsiveness	Hormone
BnERF-23	TGACG-motif	TGACG	1769	5	-	Hordeum vulgare	cis-acting regulatory element involved in the MeJA-responsiveness	MeJA-responsiveness	Hormone
BnERF-23	TGACG-motif	TGACG	1824	5	-	Hordeum vulgare	cis-acting regulatory element involved in the MeJA-responsiveness	MeJA-responsiveness	Hormone
BnERF-23	CGTCA-motif	CGTCA	1769	5	+	Hordeum vulgare	cis-acting regulatory element involved in the MeJA-responsiveness	MeJA-responsiveness	Hormone
BnERF-23	CGTCA-motif	CGTCA	1824	5	+	Hordeum vulgare	cis-acting regulatory element involved in the MeJA-responsiveness	MeJA-responsiveness	Hormone
BnERF-24	TGACG-motif	TGACG	1788	5	+	Hordeum vulgare	cis-acting regulatory element involved in the MeJA-responsiveness	MeJA-responsiveness	Hormone
BnERF-24	CGTCA-motif	CGTCA	1788	5	-	Hordeum vulgare	cis-acting regulatory element involved in the MeJA-responsiveness	MeJA-responsiveness	Hormone
BnERF-25	CGTCA-motif	CGTCA	911	5	-	Hordeum vulgare	cis-acting regulatory element involved in the MeJA-responsiveness	MeJA-responsiveness	Hormone
BnERF-25	CGTCA-motif	CGTCA	1596	5	+	Hordeum vulgare	cis-acting regulatory element involved in the MeJA-responsiveness	MeJA-responsiveness	Hormone
BnERF-25	TGACG-motif	TGACG	911	5	+	Hordeum vulgare	cis-acting regulatory element involved in the MeJA-responsiveness	MeJA-responsiveness	Hormone
BnERF-25	TGACG-motif	TGACG	1596	5	-	Hordeum vulgare	cis-acting regulatory element involved in the MeJA-responsiveness	MeJA-responsiveness	Hormone
BnERF-26	CGTCA-motif	CGTCA	811	5	+	Hordeum vulgare	cis-acting regulatory element involved in the MeJA-responsiveness	MeJA-responsiveness	Hormone
BnERF-26	CGTCA-motif	CGTCA	1068	5	-	Hordeum vulgare	cis-acting regulatory element involved in the MeJA-responsiveness	MeJA-responsiveness	Hormone
BnERF-26	TGACG-motif	TGACG	811	5	-	Hordeum vulgare	cis-acting regulatory element involved in the MeJA-responsiveness	MeJA-responsiveness	Hormone
BnERF-26	TGACG-motif	TGACG	1068	5	+	Hordeum vulgare	cis-acting regulatory element involved in the MeJA-responsiveness	MeJA-responsiveness	Hormone
BnERF-27	TGACG-motif	TGACG	1220	5	-	Hordeum vulgare	cis-acting regulatory element involved in the MeJA-responsiveness	MeJA-responsiveness	Hormone
BnERF-27	CGTCA-motif	CGTCA	1220	5	+	Hordeum vulgare	cis-acting regulatory element involved in the MeJA-responsiveness	MeJA-responsiveness	Hormone
BnERF-28	TGACG-motif	TGACG	1063	5	-	Hordeum vulgare	cis-acting regulatory element involved in the MeJA-responsiveness	MeJA-responsiveness	Hormone
BnERF-28	CGTCA-motif	CGTCA	1063	5	+	Hordeum vulgare	cis-acting regulatory element involved in the MeJA-responsiveness	MeJA-responsiveness	Hormone
BnERF-29	TGACG-motif	TGACG	1643	5	-	Hordeum vulgare	cis-acting regulatory element involved in the MeJA-responsiveness	MeJA-responsiveness	Hormone
BnERF-29	CGTCA-motif	CGTCA	1643	5	+	Hordeum vulgare	cis-acting regulatory element involved in the MeJA-responsiveness	MeJA-responsiveness	Hormone
BnERF-3	CGTCA-motif	CGTCA	977	5	-	Hordeum vulgare	cis-acting regulatory element involved in the MeJA-responsiveness	MeJA-responsiveness	Hormone
BnERF-3	CGTCA-motif	CGTCA	1723	5	+	Hordeum vulgare	cis-acting regulatory element involved in the MeJA-responsiveness	MeJA-responsiveness	Hormone
BnERF-3	CGTCA-motif	CGTCA	1738	5	-	Hordeum vulgare	cis-acting regulatory element involved in the MeJA-responsiveness	MeJA-responsiveness	Hormone
BnERF-3	TGACG-motif	TGACG	977	5	+	Hordeum vulgare	cis-acting regulatory element involved in the MeJA-responsiveness	MeJA-responsiveness	Hormone
BnERF-3	TGACG-motif	TGACG	1723	5	-	Hordeum vulgare	cis-acting regulatory element involved in the MeJA-responsiveness	MeJA-responsiveness	Hormone
BnERF-3	TGACG-motif	TGACG	1738	5	+	Hordeum vulgare	cis-acting regulatory element involved in the MeJA-responsiveness	MeJA-responsiveness	Hormone
BnERF-30	TGACG-motif	TGACG	654	5	+	Hordeum vulgare	cis-acting regulatory element involved in the MeJA-responsiveness	MeJA-responsiveness	Hormone
BnERF-30	CGTCA-motif	CGTCA	654	5	-	Hordeum vulgare	cis-acting regulatory element involved in the MeJA-responsiveness	MeJA-responsiveness	Hormone
BnERF-31	TGACG-motif	TGACG	1508	5	-	Hordeum vulgare	cis-acting regulatory element involved in the MeJA-responsiveness	MeJA-responsiveness	Hormone
BnERF-31	CGTCA-motif	CGTCA	1508	5	+	Hordeum vulgare	cis-acting regulatory element involved in the MeJA-responsiveness	MeJA-responsiveness	Hormone
BnERF-32	TGACG-motif	TGACG	126	5	-	Hordeum vulgare	cis-acting regulatory element involved in the MeJA-responsiveness	MeJA-responsiveness	Hormone
BnERF-32	TGACG-motif	TGACG	1607	5	-	Hordeum vulgare	cis-acting regulatory element involved in the MeJA-responsiveness	MeJA-responsiveness	Hormone
BnERF-32	TGACG-motif	TGACG	1871	5	+	Hordeum vulgare	cis-acting regulatory element involved in the MeJA-responsiveness	MeJA-responsiveness	Hormone
BnERF-32	CGTCA-motif	CGTCA	126	5	+	Hordeum vulgare	cis-acting regulatory element involved in the MeJA-responsiveness	MeJA-responsiveness	Hormone
BnERF-32	CGTCA-motif	CGTCA	1607	5	+	Hordeum vulgare	cis-acting regulatory element involved in the MeJA-responsiveness	MeJA-responsiveness	Hormone
BnERF-32	CGTCA-motif	CGTCA	1871	5	-	Hordeum vulgare	cis-acting regulatory element involved in the MeJA-responsiveness	MeJA-responsiveness	Hormone
BnERF-33	TGACG-motif	TGACG	1207	5	-	Hordeum vulgare	cis-acting regulatory element involved in the MeJA-responsiveness	MeJA-responsiveness	Hormone
BnERF-33	CGTCA-motif	CGTCA	1207	5	+	Hordeum vulgare	cis-acting regulatory element involved in the MeJA-responsiveness	MeJA-responsiveness	Hormone
BnERF-34	CGTCA-motif	CGTCA	648	5	-	Hordeum vulgare	cis-acting regulatory element involved in the MeJA-responsiveness	MeJA-responsiveness	Hormone
BnERF-34	TGACG-motif	TGACG	648	5	+	Hordeum vulgare	cis-acting regulatory element involved in the MeJA-responsiveness	MeJA-responsiveness	Hormone
BnERF-36	CGTCA-motif	CGTCA	42	5	-	Hordeum vulgare	cis-acting regulatory element involved in the MeJA-responsiveness	MeJA-responsiveness	Hormone
BnERF-36	CGTCA-motif	CGTCA	358	5	-	Hordeum vulgare	cis-acting regulatory element involved in the MeJA-responsiveness	MeJA-responsiveness	Hormone
BnERF-36	TGACG-motif	TGACG	42	5	+	Hordeum vulgare	cis-acting regulatory element involved in the MeJA-responsiveness	MeJA-responsiveness	Hormone
BnERF-36	TGACG-motif	TGACG	358	5	+	Hordeum vulgare	cis-acting regulatory element involved in the MeJA-responsiveness	MeJA-responsiveness	Hormone
BnERF-37	CGTCA-motif	CGTCA	912	5	+	Hordeum vulgare	cis-acting regulatory element involved in the MeJA-responsiveness	MeJA-responsiveness	Hormone
BnERF-37	TGACG-motif	TGACG	912	5	-	Hordeum vulgare	cis-acting regulatory element involved in the MeJA-responsiveness	MeJA-responsiveness	Hormone
BnERF-38	TGACG-motif	TGACG	1379	5	-	Hordeum vulgare	cis-acting regulatory element involved in the MeJA-responsiveness	MeJA-responsiveness	Hormone
BnERF-38	TGACG-motif	TGACG	1607	5	-	Hordeum vulgare	cis-acting regulatory element involved in the MeJA-responsiveness	MeJA-responsiveness	Hormone
BnERF-38	CGTCA-motif	CGTCA	1379	5	+	Hordeum vulgare	cis-acting regulatory element involved in the MeJA-responsiveness	MeJA-responsiveness	Hormone
BnERF-38	CGTCA-motif	CGTCA	1607	5	+	Hordeum vulgare	cis-acting regulatory element involved in the MeJA-responsiveness	MeJA-responsiveness	Hormone
BnERF-40	CGTCA-motif	CGTCA	264	5	-	Hordeum vulgare	cis-acting regulatory element involved in the MeJA-responsiveness	MeJA-responsiveness	Hormone
BnERF-40	CGTCA-motif	CGTCA	479	5	-	Hordeum vulgare	cis-acting regulatory element involved in the MeJA-responsiveness	MeJA-responsiveness	Hormone
BnERF-40	CGTCA-motif	CGTCA	1648	5	+	Hordeum vulgare	cis-acting regulatory element involved in the MeJA-responsiveness	MeJA-responsiveness	Hormone
BnERF-40	TGACG-motif	TGACG	264	5	+	Hordeum vulgare	cis-acting regulatory element involved in the MeJA-responsiveness	MeJA-responsiveness	Hormone
BnERF-40	TGACG-motif	TGACG	479	5	+	Hordeum vulgare	cis-acting regulatory element involved in the MeJA-responsiveness	MeJA-responsiveness	Hormone
BnERF-40	TGACG-motif	TGACG	1648	5	-	Hordeum vulgare	cis-acting regulatory element involved in the MeJA-responsiveness	MeJA-responsiveness	Hormone
BnERF-41	CGTCA-motif	CGTCA	539	5	+	Hordeum vulgare	cis-acting regulatory element involved in the MeJA-responsiveness	MeJA-responsiveness	Hormone
BnERF-41	TGACG-motif	TGACG	539	5	-	Hordeum vulgare	cis-acting regulatory element involved in the MeJA-responsiveness	MeJA-responsiveness	Hormone
BnERF-5	CGTCA-motif	CGTCA	191	5	-	Hordeum vulgare	cis-acting regulatory element involved in the MeJA-responsiveness	MeJA-responsiveness	Hormone
BnERF-5	TGACG-motif	TGACG	191	5	+	Hordeum vulgare	cis-acting regulatory element involved in the MeJA-responsiveness	MeJA-responsiveness	Hormone
BnERF-6	CGTCA-motif	CGTCA	1553	5	-	Hordeum vulgare	cis-acting regulatory element involved in the MeJA-responsiveness	MeJA-responsiveness	Hormone
BnERF-6	CGTCA-motif	CGTCA	1556	5	+	Hordeum vulgare	cis-acting regulatory element involved in the MeJA-responsiveness	MeJA-responsiveness	Hormone
BnERF-6	CGTCA-motif	CGTCA	1567	5	-	Hordeum vulgare	cis-acting regulatory element involved in the MeJA-responsiveness	MeJA-responsiveness	Hormone
BnERF-6	TGACG-motif	TGACG	1553	5	+	Hordeum vulgare	cis-acting regulatory element involved in the MeJA-responsiveness	MeJA-responsiveness	Hormone
BnERF-6	TGACG-motif	TGACG	1556	5	-	Hordeum vulgare	cis-acting regulatory element involved in the MeJA-responsiveness	MeJA-responsiveness	Hormone
BnERF-6	TGACG-motif	TGACG	1567	5	+	Hordeum vulgare	cis-acting regulatory element involved in the MeJA-responsiveness	MeJA-responsiveness	Hormone
BnERF-7	TGACG-motif	TGACG	713	5	+	Hordeum vulgare	cis-acting regulatory element involved in the MeJA-responsiveness	MeJA-responsiveness	Hormone
BnERF-7	TGACG-motif	TGACG	1499	5	+	Hordeum vulgare	cis-acting regulatory element involved in the MeJA-responsiveness	MeJA-responsiveness	Hormone
BnERF-7	TGACG-motif	TGACG	1568	5	-	Hordeum vulgare	cis-acting regulatory element involved in the MeJA-responsiveness	MeJA-responsiveness	Hormone
BnERF-7	TGACG-motif	TGACG	1575	5	+	Hordeum vulgare	cis-acting regulatory element involved in the MeJA-responsiveness	MeJA-responsiveness	Hormone
BnERF-7	CGTCA-motif	CGTCA	713	5	-	Hordeum vulgare	cis-acting regulatory element involved in the MeJA-responsiveness	MeJA-responsiveness	Hormone
BnERF-7	CGTCA-motif	CGTCA	1499	5	-	Hordeum vulgare	cis-acting regulatory element involved in the MeJA-responsiveness	MeJA-responsiveness	Hormone
BnERF-7	CGTCA-motif	CGTCA	1568	5	+	Hordeum vulgare	cis-acting regulatory element involved in the MeJA-responsiveness	MeJA-responsiveness	Hormone
BnERF-7	CGTCA-motif	CGTCA	1575	5	-	Hordeum vulgare	cis-acting regulatory element involved in the MeJA-responsiveness	MeJA-responsiveness	Hormone
BnERF-8	CGTCA-motif	CGTCA	362	5	-	Hordeum vulgare	cis-acting regulatory element involved in the MeJA-responsiveness	MeJA-responsiveness	Hormone
BnERF-8	CGTCA-motif	CGTCA	1367	5	-	Hordeum vulgare	cis-acting regulatory element involved in the MeJA-responsiveness	MeJA-responsiveness	Hormone
BnERF-8	CGTCA-motif	CGTCA	1370	5	+	Hordeum vulgare	cis-acting regulatory element involved in the MeJA-responsiveness	MeJA-responsiveness	Hormone
BnERF-8	CGTCA-motif	CGTCA	1766	5	+	Hordeum vulgare	cis-acting regulatory element involved in the MeJA-responsiveness	MeJA-responsiveness	Hormone
BnERF-8	TGACG-motif	TGACG	362	5	+	Hordeum vulgare	cis-acting regulatory element involved in the MeJA-responsiveness	MeJA-responsiveness	Hormone
BnERF-8	TGACG-motif	TGACG	1367	5	+	Hordeum vulgare	cis-acting regulatory element involved in the MeJA-responsiveness	MeJA-responsiveness	Hormone
BnERF-8	TGACG-motif	TGACG	1370	5	-	Hordeum vulgare	cis-acting regulatory element involved in the MeJA-responsiveness	MeJA-responsiveness	Hormone
BnERF-8	TGACG-motif	TGACG	1766	5	-	Hordeum vulgare	cis-acting regulatory element involved in the MeJA-responsiveness	MeJA-responsiveness	Hormone
BnRAV-1	CGTCA-motif	CGTCA	830	5	-	Hordeum vulgare	cis-acting regulatory element involved in the MeJA-responsiveness	MeJA-responsiveness	Hormone
BnRAV-1	TGACG-motif	TGACG	830	5	+	Hordeum vulgare	cis-acting regulatory element involved in the MeJA-responsiveness	MeJA-responsiveness	Hormone
BnRAV-2	CGTCA-motif	CGTCA	101	5	-	Hordeum vulgare	cis-acting regulatory element involved in the MeJA-responsiveness	MeJA-responsiveness	Hormone
BnRAV-2	TGACG-motif	TGACG	101	5	+	Hordeum vulgare	cis-acting regulatory element involved in the MeJA-responsiveness	MeJA-responsiveness	Hormone
BnERF-21	CGTCA-motif	CGTCA	1159	5	+	Hordeum vulgare	cis-acting regulatory element involved in the MeJA-responsiveness	MeJA-responsiveness	Hormone
BnERF-21	TGACG-motif	TGACG	1159	5	-	Hordeum vulgare	cis-acting regulatory element involved in the MeJA-responsiveness	MeJA-responsiveness	Hormone
BnAP2-17	CAT-box	GCCACT	1107	6	+	Arabidopsis thaliana	cis-acting regulatory element related to meristem expression	meristem expression	Growth and development
BnAP2-18	NON-box	AGATCGACG	1072	9	-	Arabidopsis thaliana	cis-acting regulatory element related to meristem specific activation	meristem expression	Growth and development
BnAP2-2	CAT-box	GCCACT	58	6	+	Arabidopsis thaliana	cis-acting regulatory element related to meristem expression	meristem expression	Growth and development
BnAP2-3	CAT-box	GCCACT	1880	6	+	Arabidopsis thaliana	cis-acting regulatory element related to meristem expression	meristem expression	Growth and development
BnDREB-14	CAT-box	GCCACT	1228	6	-	Arabidopsis thaliana	cis-acting regulatory element related to meristem expression	meristem expression	Growth and development
[truncated: 136 more rows]
