# Supplementary material for: BnAP2-12 overexpression delays ramie flowering: evidence from AP2/ERF gene expression
Source: Front Plant Sci. 2024 Mar 25;15:1367837. doi: 10.3389/fpls.2024.1367837 (PMC10999622; doi:10.3389/fpls.2024.1367837)
Supplement: Supplementary file 13 [file Table_3.xlsx]

## Sheet: Sheet1
Table S3. Ka/Ks calculation of the duplicated BnAP2/ERF gene pairs.
Seq_1	Seq_2	Ka	Ks	Ka_Ks	Divergence time(MYA)	Note
Bni01T001084.1	Bni13T017907.1	0.342132	1.06086	0.322504	156.469
Bni02T003300.1	Bni11T015715.2	0.387999	0.770488	0.503575	113.641
Bni03T004611.1	Bni07T010642.1	0.815714	2.0583	0.396305	303.584
Bni05T006796.1	Bni13T018205.1	0.386839	1.2141	0.318621	179.071
Bni05T008162.2	Bni04T005462.1	0.669088	1.41221	0.473789	208.29
Bni05T008171.1	Bni13T017907.1	0.486317	NaN	NaN	/	High Sequence Divergence Value (pS>=0.75)
Bni06T008530.1	Bni11T016085.1	0.618709	1.37604	0.44963	202.956
Bni06T009529.1	Bni14T018819.1	0.896753	NaN	NaN	/	High Sequence Divergence Value (pS>=0.75)
Bni02T002696.1	Bni08T011673.1	0.521733	1.02831	0.507371	151.668
Bni03T004459.1	Bni07T010165.1	0.703398	NaN	NaN	/	High Sequence Divergence Value (pS>=0.75)
Bni03T004495.1	Bni07T010642.1	0.794976	NaN	NaN	/	High Sequence Divergence Value (pS>=0.75)
Bni07T010642.1	Bni08T011483.1	0.515163	1.28133	0.402054	188.986
Bni08T012119.1	Bni05T007353.1	0.448381	1.01455	0.441952	149.638
Bni01T001352.1	Bni14T018708.2	0.333682	2.07789	0.160587	306.473
Bni02T003025.3	Bni12T017297.1	0.324198	2.36253	0.137225	348.456
Bni02T003025.3	Bni03T003931.1	0.340751	1.6063	0.212134	236.917
Bni02T003428.1	Bni12T016797.1	0.84194	NaN	NaN	/	High Sequence Divergence Value (pS>=0.75)
Bni04T006287.1	Bni09T013531.1	0.400501	1.42149	0.281747	209.66
Bni12T017297.1	Bni03T003931.1	0.352956	1.2093	0.291867	178.364
