# Supplementary material for: BnAP2-12 overexpression delays ramie flowering: evidence from AP2/ERF gene expression
Source: Front Plant Sci. 2024 Mar 25;15:1367837. doi: 10.3389/fpls.2024.1367837 (PMC10999622; doi:10.3389/fpls.2024.1367837)
Supplement: Supplementary file 14 [file Table_4.xlsx]

## Sheet: Sheet1
Table S4. Summary of the raw sequencing data and mapping rate of B. nivea.
	Total Reads	Mapped Reads(ratio)	Uniq mapped Reads(ratio)	Multi mapped Reads(ratio)	Q20	Q30
GBN08maleflower-1	65765670	49108888(74.67%)	36763885(74.86%)	12345003(25.14%)	95.75	90.74
GBN08maleflower-2	66584711	51340409(77.11%)	38001355(74.02%)	13339054(25.98%)	95.43	90.57
GBN08maleflower-3	65753979	51413863(78.19%)	37598355(73.13%)	13815508(26.87%)	95.85	90.86
GBN09femaleflower-1	65234500	53057168(81.33%)	38584495(72.72%)	14472673(27.28%)	95.4	90.17
GBN09femaleflower-2	78788407	65387813(82.99%)	46946564(71.80%)	18441249(28.20%)	94.52	89.08
