# Supplementary material for: BnAP2-12 overexpression delays ramie flowering: evidence from AP2/ERF gene expression
Source: Front Plant Sci. 2024 Mar 25;15:1367837. doi: 10.3389/fpls.2024.1367837 (PMC10999622; doi:10.3389/fpls.2024.1367837)
Supplement: Supplementary file 15 [file Table_5.xlsx]

## Sheet: Sheet1
Table S5 the list of different expression genes
No.	gene_id	GBN08_maleflower1_count	GBN08_maleflower2_count	GBN08_maleflower3_count	GBN09_femaleflower1_count	GBN09_femaleflower2_count	GBN08_maleflower1_CPM	GBN08_maleflower2_CPM	GBN08_maleflower3_CPM	GBN09_femaleflower1_CPM	GBN09_femaleflower2_CPM	CK_mean	Treat_mean	log2.fc.	PValue	FDR	Expression.change	SWISS
3384	Bni13T018056	63	56	57	215	87	4.62	4.03	4.3	14.86	7.44	4.31667	11.15	1.3691	0.00126046	0.00533887	Up	Full=(-)-alpha-pinene synthase; Short=FvPINS [Fragaria vesca]
3081	Bni12T016532	2	3	1	0	123	0.15	0.22	0.08	0	10.52	0.15	5.26	5.132	0.00381415	0.0137857	Up	Full=(-)-germacrene D synthase [Vitis vinifera]
3082	Bni12T016543	0	0	0	0	326	0	0	0	0	27.89	0.001	13.945	13.7675	7.46e-08	9.36e-07	Up	Full=(-)-germacrene D synthase [Vitis vinifera]
2339	Bni08T012382	247	243	304	380	673	18.13	17.49	22.96	26.27	57.58	19.5267	41.925	1.1024	0.0040347	0.0144889	Up	Full=(+)-neomenthol dehydrogenase; AltName: Full=Menthone:neomenthol reductase; AltName: Full=Short-chain dehydrogenase/reductase 1; Short=AtSDR1 [Arabidopsis thaliana]
2341	Bni08T012385	142	105	98	148	373	10.42	7.56	7.4	10.23	31.91	8.46	21.07	1.3165	0.0124081	0.0366933	Up	Full=(+)-neomenthol dehydrogenase; AltName: Full=Menthone:neomenthol reductase; AltName: Full=Short-chain dehydrogenase/reductase 1; Short=AtSDR1 [Arabidopsis thaliana]
1334	Bni05T006999	40	50	82	696	466	2.94	3.6	6.19	48.11	39.87	4.24333	43.99	3.3739	2.17e-20	1.59e-18	Up	Full=(3S,6E)-nerolidol synthase 1; Short=FaNES1 [Fragaria x ananassa]
1555	Bni05T008068	90	90	49	209	143	6.6	6.48	3.7	14.45	12.24	5.59333	13.345	1.2545	0.00117444	0.00504253	Up	Full=(6-4)DNA photolyase; AltName: Full=Protein UV repair defective 3 [Arabidopsis thaliana]
3280	Bni13T017620	6	14	6	28	34	0.44	1.01	0.45	1.94	2.91	0.633333	2.425	1.9369	0.0118407	0.0353482	Up	Full=(R)-mandelonitrile lyase 4; AltName: Full=Hydroxynitrile lyase 4; Short=(R)-oxynitrilase 4; Flags: Precursor [Prunus serotina]
3284	Bni13T017640	318	215	13	22	22	23.34	15.47	0.98	1.52	1.88	13.2633	1.7	-2.9638	0.0035494	0.0129592	Down	Full=(R)-mandelonitrile lyase 4; AltName: Full=Hydroxynitrile lyase 4; Short=(R)-oxynitrilase 4; Flags: Precursor [Prunus serotina]
3607	BniUnT019296	41	69	38	183	83	3.01	4.97	2.87	12.65	7.1	3.61667	9.875	1.4491	0.0022098	0.00862986	Up	Full=(R)-mandelonitrile lyase 4; AltName: Full=Hydroxynitrile lyase 4; Short=(R)-oxynitrilase 4; Flags: Precursor [Prunus serotina]
3608	BniUnT019301	37	26	10	6	1	2.72	1.87	0.76	0.41	0.09	1.78333	0.25	-2.8346	0.0101237	0.0310487	Down	Full=(R)-mandelonitrile lyase 4; AltName: Full=Hydroxynitrile lyase 4; Short=(R)-oxynitrilase 4; Flags: Precursor [Prunus serotina]
2885	Bni11T015352	16	20	12	59	151	1.17	1.44	0.91	4.08	12.92	1.17333	8.5	2.8568	1.8e-05	0.000131475	Up	Full=(S)-8-oxocitronellyl enol synthase CYC2; AltName: Full=Cyclase 2; AltName: Full=Iridoid synthase; Short=ISY [Camptotheca acuminata]
3269	Bni13T017575	1238	1091	705	353	360	90.85	78.51	53.24	24.4	30.8	74.2	27.6	-1.4268	3.15e-06	2.76e-05	Down	Full=[Fructose-bisphosphate aldolase]-lysine N-methyltransferase, chloroplastic; AltName: Full=Aldolases N-methyltransferase; AltName: Full=[Ribulose-bisphosphate carboxylase]-lysine N-methyltransferase-like; Short=AtLSMT-L; Short=LSMT-like enzyme; Flags: Precursor [Arabidopsis thaliana]
3027	Bni11T016196	126	132	91	217	277	9.25	9.5	6.87	15	23.7	8.54	19.35	1.18	0.000699529	0.00321698	Up	Full=1,4-dihydroxy-2-naphthoyl-CoA thioesterase 1; Short=AtDHNAT1; Short=DHNA-CoA thioesterase 1 [Arabidopsis thaliana]
2820	Bni10T014893	63	60	48	2	4	4.62	4.32	3.62	0.14	0.34	4.18667	0.24	-4.1247	4.53e-08	5.97e-07	Down	Full=11-beta-hydroxysteroid dehydrogenase 1A; AltName: Full=17-beta-hydroxysteroid dehydrogenase 1A; AltName: Full=Hydroxysteroid dehydrogenase 1; Short=AtHSD1 [Arabidopsis thaliana] >P0DKC6.1 RecName: Full=11-beta-hydroxysteroid dehydrogenase 1B; AltName: Full=17-beta-hydroxysteroid dehydrogenase 1B; AltName: Full=Hydroxysteroid dehydrogenase 1; Short=AtHSD1 [Arabidopsis thaliana]
2266	Bni08T011931	37	33	21	0	1	2.72	2.37	1.59	0	0.09	2.22667	0.045	-5.6288	0.000189976	0.00104538	Down	Full=11-oxo-beta-amyrin 30-oxidase; AltName: Full=Cytochrome P450 72A154 [Glycyrrhiza uralensis]
2451	Bni09T013070	21	14	22	55	44	1.54	1.01	1.66	3.8	3.76	1.40333	3.78	1.4295	0.00609428	0.0204918	Up	Full=11S globulin seed storage protein G3; AltName: Full=Helianthinin-G3; Contains: RecName: Full=11S globulin seed storage protein G3 acidic chain; Contains: RecName: Full=11S globulin seed storage protein G3 basic chain; Flags: Precursor [Helianthus annuus]
2265	Bni08T011925	807	906	912	2246	2240	59.22	65.2	68.87	155.25	191.66	64.43	173.455	1.4288	6.05e-16	2.71e-14	Up	Full=12-oxophytodienoate reductase 7; AltName: Full=12-oxophytodienoate-10,11-reductase 7; Short=OPDA-reductase 7; Short=OsOPR7 [Oryza sativa Japonica Group]
2468	Bni09T013167	136	129	109	49	25	9.98	9.28	8.23	3.39	2.14	9.16333	2.765	-1.7286	5.78e-06	4.76e-05	Down	Full=13-hydroxylupanine O-tigloyltransferase; AltName: Full=(-)-13alpha-hydroxymultiflorine/(+)-13alpha-hydroxylupanine O-tigloyltransferase; Short=HMT/HLTase; AltName: Full=Quinolizidine alkaloid O-tigloyltransferase [Lupinus albus]
221	Bni01T001264	179	232	216	14	14	13.14	16.69	16.31	0.97	1.2	15.38	1.085	-3.8253	1.23e-22	1.08e-20	Down	Full=17.3 kDa class II heat shock protein; AltName: Full=Hsp17.3; AltName: Full=Hsp20.2 [Solanum peruvianum]
1452	Bni05T007565	46	55	70	17	16	3.38	3.96	5.29	1.18	1.37	4.21	1.275	-1.7233	0.000767119	0.00349753	Down	Full=17.4 kDa class III heat shock protein; AltName: Full=17.4 kDa heat shock protein 2; Short=AtHsp17.4B [Arabidopsis thaliana]
537	Bni02T002955	0	4	0	43	78	0	0.29	0	2.97	6.67	0.0966667	4.82	5.6399	5.92e-06	4.86e-05	Up	Full=18.2 kDa class I heat shock protein [Medicago sativa]
597	Bni02T003298	344	360	357	1033	2339	25.25	25.91	26.96	71.4	200.13	26.04	135.765	2.3823	1.6e-08	2.31e-07	Up	Full=1-aminocyclopropane-1-carboxylate oxidase homolog 1 [Arabidopsis thaliana]
3179	Bni12T017038	72	70	82	392	209	5.28	5.04	6.19	27.1	17.88	5.50333	22.49	2.0309	1.2e-10	2.46e-09	Up	Full=1-aminocyclopropane-1-carboxylate oxidase homolog 1 [Arabidopsis thaliana]
3200	Bni12T017148	7746	8708	8060	23284	13068	568.46	626.63	608.69	1609.48	1118.14	601.26	1363.81	1.1816	1.79e-09	3.06e-08	Up	Full=1-aminocyclopropane-1-carboxylate oxidase homolog 1 [Arabidopsis thaliana]
3392	Bni13T018098	3	3	1	22	38	0.22	0.22	0.08	1.52	3.25	0.173333	2.385	3.7824	0.000155076	0.000872804	Up	Full=1-aminocyclopropane-1-carboxylate oxidase homolog 3 [Arabidopsis thaliana]
2423	Bni09T012934	2	7	0	64	72	0.15	0.5	0	4.42	6.16	0.216667	5.29	4.6097	3.73e-06	3.22e-05	Up	Full=1-aminocyclopropane-1-carboxylate oxidase homolog 4 [Arabidopsis thaliana]
1731	Bni06T009110	5	1	2	22	22	0.37	0.07	0.15	1.52	1.88	0.196667	1.7	3.1117	0.00305591	0.0113809	Up	Full=1-aminocyclopropane-1-carboxylate oxidase homolog 7 [Arabidopsis thaliana]
1490	Bni05T007712	458	477	412	14168	6067	33.61	34.32	31.11	979.35	519.11	33.0133	749.23	4.5043	2.65e-54	1.31e-51	Up	Full=1-aminocyclopropane-1-carboxylate oxidase; Short=ACC oxidase; AltName: Full=Ethylene-forming enzyme; Short=EFE [Actinidia deliciosa]
2118	Bni07T011114	262	239	196	530	580	19.23	17.2	14.8	36.64	49.63	17.0767	43.135	1.3368	2.85e-07	3.18e-06	Up	Full=1-aminocyclopropane-1-carboxylate synthase; Short=ACC synthase; AltName: Full=S-adenosyl-L-methionine methylthioadenosine-lyase [Vigna radiata var. radiata]
2157	Bni07T011307	133	182	137	787	440	9.76	13.1	10.35	54.4	37.65	11.07	46.025	2.0558	1.47e-13	4.71e-12	Up	Full=21 kDa protein; AltName: Full=1.2 protein; Flags: Precursor [Daucus carota]
2419	Bni09T012898	85	137	131	372	295	6.24	9.86	9.89	25.71	25.24	8.66333	25.475	1.5561	1.48e-07	1.75e-06	Up	Full=21 kDa protein; AltName: Full=1.2 protein; Flags: Precursor [Daucus carota]
1378	Bni05T007211	400	458	432	192	165	29.35	32.96	32.62	13.27	14.12	31.6433	13.695	-1.2083	5.33e-10	9.89e-09	Down	Full=2-alkenal reductase (NADP(+)-dependent); AltName: Full=Alkenal double bound reductase; AltName: Full=Allylic alcohol dehydrogenase 1; Short=allyl-ADH1; AltName: Full=Flavin-free double bond reductase; Short=NtDBR; AltName: Full=Pulegone reductase; Short=NtRed-1 [Nicotiana tabacum]
1589	Bni05T008284	1210	1078	949	2056	2624	88.8	77.57	71.67	142.12	224.52	79.3467	183.32	1.2081	3.89e-06	3.36e-05	Up	Full=2-alkenal reductase (NADP(+)-dependent); AltName: Full=Alkenal double bound reductase; AltName: Full=Allylic alcohol dehydrogenase 1; Short=allyl-ADH1; AltName: Full=Flavin-free double bond reductase; Short=NtDBR; AltName: Full=Pulegone reductase; Short=NtRed-1 [Nicotiana tabacum]
2070	Bni07T010841	260	251	242	554	510	19.08	18.06	18.28	38.29	43.64	18.4733	40.965	1.1489	1.14e-09	2.01e-08	Up	Full=2-carboxy-1,4-naphthoquinone phytyltransferase, chloroplastic; AltName: Full=1,4-dihydroxy-2-naphthoate phytyltransferase; AltName: Full=1,4-dihydroxy-2-naphthoate polyprenyltransferase; AltName: Full=Protein ABERRANT CHLOROPLAST DEVELOPMENT 4; AltName: Full=menA-like protein; Short=AtMENA; Flags: Precursor [Arabidopsis thaliana]
2525	Bni09T013456	657	393	105	21	12	48.22	28.28	7.93	1.45	1.03	28.1433	1.24	-4.5044	5.22e-10	9.72e-09	Down	Full=2-hydroxy-palmitic acid dioxygenase mpo1; AltName: Full=Metabolism of phytosphingosine to odd-numbered fatty acids protein 1; Short=Metabolism of PHS to odd-numbered FA protein 1 [Schizosaccharomyces pombe 972h-]
1683	Bni06T008835	39	33	34	5	0	2.86	2.37	2.57	0.35	0	2.6	0.175	-3.8931	7.46e-05	0.000461778	Down	Full=2-isopropylmalate synthase A; AltName: Full=Alpha-IPM synthase A; AltName: Full=Alpha-isopropylmalate synthase A [Solanum pennellii]
3530	Bni14T018860	112	92	108	387	195	8.22	6.62	8.16	26.75	16.68	7.66667	21.715	1.502	3.67e-06	3.18e-05	Up	Full=2-keto-3-deoxy-L-fuconate dehydrogenase [Xanthomonas campestris pv. campestris str. ATCC 33913]
1208	Bni04T006378	3120	3009	2950	7148	6144	228.97	216.53	222.78	494.1	525.7	222.76	509.9	1.1947	1.67e-23	1.56e-21	Up	Full=2-methylene-furan-3-one reductase; AltName: Full=Enone oxidoreductase; Short=FaEO; AltName: Full=Quinone oxidoreductase; Short=FaQR [Fragaria x ananassa]
2246	Bni08T011850	178	243	193	859	342	13.06	17.49	14.58	59.38	29.26	15.0433	44.32	1.5588	1.5e-05	0.000111792	Up	Full=2-oxoglutarate-dependent dioxygenase AOP3 [Arabidopsis thaliana]
2858	Bni10T015103	117	108	190	57	57	8.59	7.77	14.35	3.94	4.88	10.2367	4.41	-1.2149	0.00442337	0.0156728	Down	Full=30S ribosomal protein S17 [Roseiflexus castenholzii DSM 13941]
144	Bni01T000913	353	334	343	23	37	25.91	24.03	25.9	1.59	3.17	25.28	2.38	-3.409	1.26e-22	1.1e-20	Down	Full=30S ribosomal protein S9, mitochondrial; Flags: Precursor [Arabidopsis thaliana]
1094	Bni04T005891	891	1169	1219	2384	1966	65.39	84.12	92.06	164.79	168.22	80.5233	166.505	1.0481	6.42e-08	8.18e-07	Up	Full=36.4 kDa proline-rich protein [Solanum lycopersicum]
2177	Bni08T011496	393	339	378	193	127	28.84	24.39	28.55	13.34	10.87	27.26	12.105	-1.1712	4.21e-07	4.54e-06	Down	Full=3-hydroxyisobutyryl-CoA hydrolase-like protein 1, mitochondrial; Flags: Precursor [Arabidopsis thaliana]
2857	Bni10T015100	2624	1834	370	0	0	192.57	131.97	27.94	0	0	117.493	0.001	-16.8422	1.12e-11	2.75e-10	Down	Full=3-ketoacyl-CoA synthase 15; Short=KCS-15; AltName: Full=Very long-chain fatty acid condensing enzyme 15; Short=VLCFA condensing enzyme 15 [Arabidopsis thaliana]
695	Bni03T003896	76	94	121	324	779	5.58	6.76	9.14	22.4	66.65	7.16	44.525	2.6366	1.49e-07	1.76e-06	Up	Full=3-ketoacyl-CoA synthase 19; Short=KCS-19; AltName: Full=Very long-chain fatty acid condensing enzyme 19; Short=VLCFA condensing enzyme 19 [Arabidopsis thaliana]
3406	Bni13T018162	1063	1203	1098	5381	1941	78.01	86.57	82.92	371.96	166.08	82.5	269.02	1.7052	4.94e-07	5.23e-06	Up	Full=3-ketoacyl-CoA synthase 20; Short=KCS-20; AltName: Full=Very long-chain fatty acid condensing enzyme 20; Short=VLCFA condensing enzyme 20 [Arabidopsis thaliana]
2415	Bni09T012889	439	422	353	1507	757	32.22	30.37	26.66	104.17	64.77	29.75	84.47	1.5055	1.99e-08	2.81e-07	Up	Full=3-ketoacyl-CoA synthase 6; Short=KCS-6; AltName: Full=Cuticular protein 1; AltName: Full=Eceriferum 6; AltName: Full=Very long-chain fatty acid condensing enzyme 6; Short=VLCFA condensing enzyme 6 [Arabidopsis thaliana]
1907	Bni06T009959	3371	2285	598	1	0	247.39	164.43	45.16	0.07	0	152.327	0.035	-12.0875	7.78e-15	3.01e-13	Down	Full=3-ketoacyl-CoA synthase 7; Short=KCS-7; AltName: Full=Very long-chain fatty acid condensing enzyme 7; Short=VLCFA condensing enzyme 7 [Arabidopsis thaliana]
2329	Bni08T012298	365	450	395	163	137	26.79	32.38	29.83	11.27	11.72	29.6667	11.495	-1.3678	1.25e-10	2.55e-09	Down	Full=3-methyl-2-oxobutanoate hydroxymethyltransferase 2, mitochondrial; AltName: Full=Ketopantoate hydroxymethyltransferase 2; Flags: Precursor [Arabidopsis thaliana]
2596	Bni09T013789	2254	2102	1688	1162	683	165.42	151.26	127.48	80.32	58.44	148.053	69.38	-1.0935	1.81e-06	1.68e-05	Down	Full=3-oxoacyl-[acyl-carrier-protein] reductase, chloroplastic; AltName: Full=3-ketoacyl-acyl carrier protein reductase; Flags: Precursor [Cuphea lanceolata]
1999	Bni07T010527	2300	1571	626	12	4	168.79	113.05	47.28	0.83	0.34	109.707	0.585	-7.551	1.76e-31	3.1e-29	Down	Full=3-oxoacyl-[acyl-carrier-protein] synthase I, chloroplastic; AltName: Full=Beta-ketoacyl-ACP synthase I; Short=KAS I; Flags: Precursor [Arabidopsis thaliana]
1451	Bni05T007552	3619	2180	659	67	17	265.59	156.87	49.77	4.63	1.45	157.41	3.04	-5.6943	9.14e-09	1.37e-07	Down	Full=3-oxoacyl-[acyl-carrier-protein] synthase II, chloroplastic; AltName: Full=Beta-ketoacyl-acyl-carrier-protein synthase II; Short=AtKAS2; Short=Beta-ketoacyl-ACP synthetase 2; AltName: Full=Protein FATTY ACID BIOSYNTHESIS 1; Flags: Precursor [Arabidopsis thaliana]
2244	Bni08T011845	3952	2886	1911	1484	947	290.03	207.68	144.32	102.58	81.03	214.01	91.805	-1.221	0.000233205	0.00124672	Down	Full=3-oxoacyl-[acyl-carrier-protein] synthase II, chloroplastic; AltName: Full=Beta-ketoacyl-acyl-carrier-protein synthase II; Short=AtKAS2; Short=Beta-ketoacyl-ACP synthetase 2; AltName: Full=Protein FATTY ACID BIOSYNTHESIS 1; Flags: Precursor [Arabidopsis thaliana]
994	Bni04T005407	85	179	131	58	12	6.24	12.88	9.89	4.01	1.03	9.67	2.52	-1.9401	0.00281338	0.0106057	Down	Full=40S ribosomal protein S10-3 [Arabidopsis thaliana]
2973	Bni11T015847	67	57	21	10	9	4.92	4.1	1.59	0.69	0.77	3.53667	0.73	-2.2764	0.00239413	0.00921636	Down	Full=40S ribosomal protein S17 [Solanum lycopersicum]
1743	Bni06T009207	385	419	422	226	126	28.25	30.15	31.87	15.62	10.78	30.09	13.2	-1.1887	1.7e-06	1.59e-05	Down	Full=40S ribosomal protein S18 [Arabidopsis thaliana]
822	Bni03T004533	742	636	679	379	182	54.45	45.77	51.28	26.2	15.57	50.5	20.885	-1.2738	6.81e-06	5.51e-05	Down	Full=40S ribosomal protein S26-1 [Arabidopsis thaliana]
2605	Bni09T013841	13298	10584	5637	463	168	975.91	761.63	425.71	32	14.37	721.083	23.185	-4.9589	3.42e-29	4.97e-27	Down	Full=4-coumarate--CoA ligase-like 1; AltName: Full=4-coumarate--CoA ligase isoform 10; Short=At4CL10 [Arabidopsis thaliana]
354	Bni01T001850	836	715	734	2185	2431	61.35	51.45	55.43	151.04	208	56.0767	179.52	1.6787	1.77e-14	6.56e-13	Up	Full=4-coumarate--CoA ligase-like 5; AltName: Full=4-coumarate--CoA ligase isoform 9; Short=At4CL9; AltName: Full=Peroxisomal OPC-8:0-CoA ligase 1 [Arabidopsis thaliana]
2078	Bni07T010889	188	207	202	54	27	13.8	14.9	15.26	3.73	2.31	14.6533	3.02	-2.2786	6.38e-12	1.63e-10	Down	Full=4-coumarate--CoA ligase-like 6; AltName: Full=4-coumarate--CoA ligase; AltName: Full=4-coumarate--CoA ligase isoform 7; Short=At4CL7; AltName: Full=4-hydroxybenzoate--CoA ligase [Arabidopsis thaliana]
3596	BniUnT019233	28	64	110	266	138	2.05	4.61	8.31	18.39	11.81	4.99	15.1	1.5974	0.00718327	0.0234151	Up	Full=50S ribosomal protein L2, chloroplastic [Morus indica]
179	Bni01T001028	547	589	421	1330	987	40.14	42.38	31.79	91.93	84.45	38.1033	88.19	1.2107	3.63e-09	5.9e-08	Up	Full=5'-adenylylsulfate reductase-like 4; AltName: Full=Adenosine 5'-phosphosulfate reductase-like 4; Short=APR-like 4; Short=AtAPRL4; Flags: Precursor [Arabidopsis thaliana]
3287	Bni13T017666	2369	1774	1160	203	146	173.85	127.66	87.6	14.03	12.49	129.703	13.26	-3.2901	9.9e-23	8.77e-21	Down	Full=5'-nucleotidase domain-containing protein DDB_G0275467 [Dictyostelium discoideum]
512	Bni02T002830	4046	5526	6364	2330	878	296.93	397.65	480.61	161.06	75.12	391.73	118.09	-1.73	1.76e-06	1.63e-05	Down	Full=60S acidic ribosomal protein P0-3 [Arabidopsis thaliana]
446	Bni02T002534	3561	3262	2652	1675	1150	261.33	234.73	200.28	115.78	98.4	232.113	107.09	-1.116	1.38e-08	2e-07	Down	Full=60S ribosomal protein L22-2 [Arabidopsis thaliana]
688	Bni03T003869	234	287	267	90	85	17.17	20.65	20.16	6.22	7.27	19.3267	6.745	-1.5187	2.91e-09	4.82e-08	Down	Full=60S ribosomal protein L23A [Fritillaria agrestis]
545	Bni02T002997	1659	1970	1957	649	434	121.75	141.76	147.79	44.86	37.13	137.1	40.995	-1.7417	7.12e-23	6.37e-21	Down	Full=60S ribosomal protein L35 [Euphorbia esula]
1124	Bni04T005999	1330	1425	1705	830	462	97.61	102.54	128.76	57.37	39.53	109.637	48.45	-1.1782	1.22e-06	1.18e-05	Down	Full=60S ribosomal protein L8; AltName: Full=L2; AltName: Full=Ribosomal protein TL2 [Solanum lycopersicum]
2479	Bni09T013212	440	440	501	232	153	32.29	31.66	37.84	16.04	13.09	33.93	14.565	-1.2201	2.02e-08	2.86e-07	Down	Full=60S ribosomal protein L9; AltName: Full=Gibberellin-regulated protein GA [Pisum sativum]
777	Bni03T004313	831	933	845	308	139	60.98	67.14	63.81	21.29	11.89	63.9767	16.59	-1.9472	1.04e-11	2.57e-10	Down	Full=65-kDa microtubule-associated protein 5; Short=AtMAP65-5 [Arabidopsis thaliana]
2600	Bni09T013825	234	213	153	378	690	17.17	15.33	11.55	26.13	59.04	14.6833	42.585	1.5362	0.000220562	0.00118964	Up	Full=65-kDa microtubule-associated protein 8; Short=AtMAP65-8 [Arabidopsis thaliana]
2898	Bni11T015447	656	704	724	172	142	48.14	50.66	54.68	11.89	12.15	51.16	12.02	-2.0896	4.33e-31	7.26e-29	Down	Full=70 kDa peptidyl-prolyl isomerase; AltName: Full=Peptidyl-prolyl cis-trans isomerase; Short=PPIase; AltName: Full=Rotamase [Triticum aestivum]
658	Bni03T003684	439	508	459	1197	992	32.22	36.56	34.66	82.74	84.88	34.48	83.81	1.2814	1.66e-17	8.73e-16	Up	Full=7-deoxyloganetic acid glucosyltransferase; AltName: Full=UDP-glucose glucosyltransferase 8; Short=CrUGT8; AltName: Full=UDP-glycosyltransferase 709C2 [Catharanthus roseus]
675	Bni03T003765	383	462	387	904	1151	28.11	33.25	29.23	62.49	98.48	30.1967	80.485	1.4143	1.09e-07	1.32e-06	Up	Full=7-deoxyloganetic acid glucosyltransferase; AltName: Full=UDP-glucose glucosyltransferase 8; Short=CrUGT8; AltName: Full=UDP-glycosyltransferase 709C2 [Catharanthus roseus]
1970	Bni07T010363	8	9	7	18	60	0.59	0.65	0.53	1.24	5.13	0.59	3.185	2.4325	0.00486512	0.0169665	Up	Full=7-deoxyloganetic acid glucosyltransferase; AltName: Full=UDP-glucose glucosyltransferase 8; Short=CrUGT8; AltName: Full=UDP-glycosyltransferase 709C2 [Catharanthus roseus]
1890	Bni06T009872	116	114	111	365	236	8.51	8.2	8.38	25.23	20.19	8.36333	22.71	1.4412	2.73e-09	4.54e-08	Up	Full=7-deoxyloganetin glucosyltransferase; AltName: Full=Genipin glucosyltransferase; AltName: Full=UDP-glucose glucosyltransferase 2; Short=GjUGT2; AltName: Full=UDP-glycosyltransferase 85A24 [Gardenia jasminoides]
1514	Bni05T007881	81	55	53	238	491	5.94	3.96	4	16.45	42.01	4.63333	29.23	2.6573	6.01e-08	7.72e-07	Up	Full=9-cis-epoxycarotenoid dioxygenase NCED2, chloroplastic; Short=LeNCED2; Short=SlNCED2; AltName: Full=Nine-cis-epoxycarotenoid dioxygenase 2; Flags: Precursor [Solanum lycopersicum]
1192	Bni04T006309	618	740	763	143	81	45.35	53.25	57.62	9.88	6.93	52.0733	8.405	-2.6312	3.37e-26	3.99e-24	Down	Full=AAA-ATPase ASD, mitochondrial; AltName: Full=AAA-ATPase 1; AltName: Full=Protein ATPASE-IN-SEED-DEVELOPMENT [Arabidopsis thaliana]
308	Bni01T001668	304	301	298	53	47	22.31	21.66	22.51	3.66	4.02	22.16	3.84	-2.5288	1.25e-23	1.19e-21	Down	Full=AAA-ATPase At3g50940; Flags: Precursor [Arabidopsis thaliana]
3252	Bni13T017457	46	58	44	167	74	3.38	4.17	3.32	11.54	6.33	3.62333	8.935	1.3022	0.00234044	0.00903989	Up	Full=AAA-ATPase At4g30250; Flags: Precursor [Arabidopsis thaliana]
2754	Bni10T014591	470	446	358	173	162	34.49	32.09	27.04	11.96	13.86	31.2067	12.91	-1.2734	1.22e-07	1.47e-06	Down	Full=ABC transporter A family member 8; Short=ABC transporter ABCA.8; Short=AtABCA8; AltName: Full=ABC2 homolog 7 [Arabidopsis thaliana]
3209	Bni12T017205	5632	5904	5407	8526	19350	413.32	424.85	408.34	589.35	1655.64	415.503	1122.49	1.4338	0.000351609	0.00177221	Up	Full=ABC transporter B family member 1; Short=ABC transporter ABCB.1; Short=AtABCB1; AltName: Full=Multidrug resistance protein 1; AltName: Full=P-glycoprotein 1; Short=AtPgp1 [Arabidopsis thaliana]
3030	Bni11T016201	27	37	66	262	118	1.98	2.66	4.98	18.11	10.1	3.20667	14.105	2.1371	4.65e-05	0.000303195	Up	Full=ABC transporter B family member 11; Short=ABC transporter ABCB.11; Short=AtABCB11; AltName: Full=Multidrug resistance protein 8; AltName: Full=P-glycoprotein 11 [Arabidopsis thaliana]
342	Bni01T001790	12	25	22	89	52	0.88	1.8	1.66	6.15	4.45	1.44667	5.3	1.8733	0.00051349	0.00246102	Up	Full=ABC transporter B family member 13; Short=ABC transporter ABCB.13; Short=AtABCB13; AltName: Full=P-glycoprotein 13; AltName: Full=Putative multidrug resistance protein 15 [Arabidopsis thaliana]
1183	Bni04T006270	2507	3059	3129	7188	7542	183.98	220.13	236.3	496.86	645.32	213.47	571.09	1.4197	1.16e-12	3.3e-11	Up	Full=ABC transporter B family member 19; Short=ABC transporter ABCB.19; Short=AtABCB19; AltName: Full=Multidrug resistance protein 11; AltName: Full=P-glycoprotein 19 [Arabidopsis thaliana]
1530	Bni05T007961	4294	3967	3104	26	18	315.13	285.47	234.41	1.8	1.54	278.337	1.67	-7.3808	6.48e-131	2.8e-127	Down	Full=ABC transporter B family member 9; Short=ABC transporter ABCB.9; Short=AtABCB9; AltName: Full=Multidrug resistance protein 9; AltName: Full=P-glycoprotein 9 [Arabidopsis thaliana]
1783	Bni06T009361	849	875	698	1797	1775	62.31	62.97	52.71	124.22	151.87	59.33	138.045	1.2183	3.22e-10	6.17e-09	Up	Full=ABC transporter C family member 4; Short=ABC transporter ABCC.4; Short=AtABCC4; AltName: Full=ATP-energized glutathione S-conjugate pump 4; AltName: Full=Glutathione S-conjugate-transporting ATPase 4; AltName: Full=Multidrug resistance-associated protein 4 [Arabidopsis thaliana]
1432	Bni05T007438	238	306	375	1311	447	17.47	22.02	28.32	90.62	38.25	22.6033	64.435	1.5113	0.000225217	0.00121024	Up	Full=ABC transporter C family member 8; Short=ABC transporter ABCC.8; Short=AtABCC8; AltName: Full=ATP-energized glutathione S-conjugate pump 6; AltName: Full=Glutathione S-conjugate-transporting ATPase 6; AltName: Full=Multidrug resistance-associated protein 6; Flags: Precursor [Arabidopsis thaliana]
1063	Bni04T005750	81	86	74	0	0	5.94	6.19	5.59	0	0	5.90667	0.001	-12.5281	7.05e-09	1.09e-07	Down	Full=ABC transporter G family member 10; Short=ABC transporter ABCG.10; Short=AtABCG10; AltName: Full=Probable white-brown complex homolog protein 10; Short=AtWBC10 [Arabidopsis thaliana]
2382	Bni08T012561	39	29	17	3	5	2.86	2.09	1.28	0.21	0.43	2.07667	0.32	-2.6981	0.00189472	0.00753915	Down	Full=ABC transporter G family member 10; Short=ABC transporter ABCG.10; Short=AtABCG10; AltName: Full=Probable white-brown complex homolog protein 10; Short=AtWBC10 [Arabidopsis thaliana]
618	Bni02T003442	2075	2221	1999	8612	3833	152.28	159.82	150.97	595.29	327.96	154.357	461.625	1.5805	6.24e-09	9.72e-08	Up	Full=ABC transporter G family member 15; Short=ABC transporter ABCG.15; Short=AtABCG15; AltName: Full=White-brown complex homolog protein 15; Short=AtWBC15; AltName: Full=White-brown complex homolog protein 22; Short=AtWBC22 [Arabidopsis thaliana]
694	Bni03T003891	68	95	92	28	14	4.99	6.84	6.95	1.94	1.2	6.26	1.57	-1.9954	1.82e-05	0.000132129	Down	Full=ABC transporter G family member 16; Short=ABC transporter ABCG.16; Short=AtABCG16; AltName: Full=Probable white-brown complex homolog protein 16; Short=AtWBC16 [Arabidopsis thaliana]
698	Bni03T003906	562	467	248	53	27	41.24	33.61	18.73	3.66	2.31	31.1933	2.985	-3.3854	6.56e-14	2.24e-12	Down	Full=ABC transporter G family member 16; Short=ABC transporter ABCG.16; Short=AtABCG16; AltName: Full=Probable white-brown complex homolog protein 16; Short=AtWBC16 [Arabidopsis thaliana]
3237	Bni12T017322	1982	1812	1201	91	42	145.45	130.39	90.7	6.29	3.59	122.18	4.94	-4.6284	5.35e-42	1.65e-39	Down	Full=ABC transporter G family member 2; Short=ABC transporter ABCG.2; Short=AtABCG2; AltName: Full=White-brown complex homolog protein 2; Short=AtWBC2 [Arabidopsis thaliana]
3439	Bni13T018312	2158	1516	843	1	2	158.37	109.09	63.66	0.07	0.17	110.373	0.12	-9.8451	2.36e-26	2.82e-24	Down	Full=ABC transporter G family member 26; Short=ABC transporter ABCG.26; Short=AtABCG26; AltName: Full=Putative white-brown complex homolog protein 27; Short=AtWBC27 [Arabidopsis thaliana]
569	Bni02T003120	433	217	48	3	1	31.78	15.62	3.62	0.21	0.09	17.0067	0.15	-6.825	5.39e-10	1e-08	Down	Full=ABC transporter G family member 28; Short=ABC transporter ABCG.28; Short=AtABCG28; AltName: Full=Putative white-brown complex homolog protein 29; Short=AtWBC29 [Arabidopsis thaliana]
511	Bni02T002817	843	806	766	20	11	61.87	58	57.85	1.38	0.94	59.24	1.16	-5.6744	6.11e-71	6.59e-68	Down	Full=ABC transporter G family member 31; Short=ABC transporter ABCG.31; Short=AtABCG31; AltName: Full=Pleiotropic drug resistance protein 3; Short=AtPDR3 [Arabidopsis thaliana]
526	Bni02T002912	388	275	89	4	10	28.47	19.79	6.72	0.28	0.86	18.3267	0.57	-5.0068	6.05e-11	1.31e-09	Down	Full=Abscisic acid 8'-hydroxylase 2; Short=ABA 8'-hydroxylase 2; AltName: Full=Cytochrome P450 707A2 [Arabidopsis thaliana]
1819	Bni06T009527	131	90	62	53	17	9.61	6.48	4.68	3.66	1.45	6.92333	2.555	-1.4381	0.0156008	0.0443138	Down	Full=Abscisic acid 8'-hydroxylase 4; Short=ABA 8'-hydroxylase 4; AltName: Full=Cytochrome P450 707A4 [Arabidopsis thaliana]
3017	Bni11T016120	1251	1329	1141	2631	2800	91.81	95.64	86.17	181.86	239.58	91.2067	210.72	1.2081	3.02e-10	5.8e-09	Up	Full=Acetate/butyrate--CoA ligase AAE7, peroxisomal; AltName: Full=AMP-binding protein 7; Short=AtAMPBP7; AltName: Full=Acetyl-CoA synthetase; AltName: Full=Acyl-activating enzyme 7; AltName: Full=Butyryl-CoA synthetase; AltName: Full=Protein ACETATE NON-UTILIZING 1 [Arabidopsis thaliana]
2338	Bni08T012374	222	234	200	222	806	16.29	16.84	15.1	15.35	68.96	16.0767	42.155	1.3907	0.014472	0.0417042	Up	Full=Acetyl-coenzyme A carboxylase carboxyl transferase subunit alpha, chloroplastic; Short=ACCase subunit alpha; Short=Acetyl-CoA carboxylase carboxyltransferase subunit alpha; Flags: Precursor [Arabidopsis thaliana]
124	Bni01T000856	38	70	44	16	4	2.79	5.04	3.32	1.11	0.34	3.71667	0.725	-2.358	0.00103127	0.00451421	Down	Full=Acetyltransferase At1g77540; AltName: Full=Minimal acetyltransferase [Arabidopsis thaliana]
852	Bni03T004664	1163	1199	1101	3738	1576	85.35	86.28	83.15	258.39	134.85	84.9267	196.62	1.2111	3.56e-05	0.000239121	Up	Full=Acid beta-fructofuranosidase 1, vacuolar; AltName: Full=Vacuolar invertase 1; Short=RvVI1; Flags: Precursor [Rosa hybrid cultivar]
2465	Bni09T013126	108	120	128	2	2	7.93	8.64	9.67	0.14	0.17	8.74667	0.155	-5.8184	3.15e-13	9.74e-12	Down	Full=ACT domain-containing protein ACR11; AltName: Full=Protein ACT DOMAIN REPEATS 11; Flags: Precursor [Arabidopsis thaliana]
193	Bni01T001110	85	81	48	0	0	6.24	5.83	3.62	0	0	5.23	0.001	-12.3526	3.2e-08	4.32e-07	Down	Full=ACT domain-containing protein ACR2; AltName: Full=Protein ACT DOMAIN REPEATS 2 [Arabidopsis thaliana]
2501	Bni09T013356	1470	1582	1411	461	427	107.88	113.84	106.56	31.87	36.54	109.427	34.205	-1.6777	2.21e-26	2.66e-24	Down	Full=ACT domain-containing protein ACR4; AltName: Full=Protein ACT DOMAIN REPEATS 4 [Arabidopsis thaliana]
2610	Bni09T013868	1521	1338	856	512	323	111.62	96.28	64.65	35.39	27.64	90.85	31.515	-1.5274	4.78e-07	5.09e-06	Down	Full=ACT domain-containing protein ACR4; AltName: Full=Protein ACT DOMAIN REPEATS 4 [Arabidopsis thaliana]
2124	Bni07T011167	43	27	1	0	0	3.16	1.94	0.08	0	0	1.72667	0.001	-10.7538	0.00124148	0.0052709	Down	Full=Actin-depolymerizing factor 10; Short=ADF-10; Short=AtADF10 [Arabidopsis thaliana]
1636	Bni06T008566	164	177	163	570	1883	12.04	12.74	12.31	39.4	161.11	12.3633	100.255	3.0195	1.4e-08	2.03e-07	Up	Full=Actin-depolymerizing factor 5; Short=ADF-5; Short=AtADF5 [Arabidopsis thaliana]
2585	Bni09T013744	989	1131	1151	1553	3270	72.58	81.39	86.92	107.35	279.79	80.2967	193.57	1.2694	0.00121431	0.00517767	Up	Full=Actin-related protein 3; AltName: Full=Protein DISTORTED TRICHOMES 1 [Arabidopsis thaliana]
3334	Bni13T017882	904	792	586	359	275	66.34	56.99	44.25	24.82	23.53	55.86	24.175	-1.2083	2.07e-06	1.89e-05	Down	Full=Actin-related protein 6; AltName: Full=Protein EARLY IN SHORT DAYS 1; AltName: Full=Protein SUPPRESSOR OF FRIGIDA 3 [Arabidopsis thaliana]
3004	Bni11T016014	4521	3793	2985	2220	1176	331.78	272.94	225.43	153.46	100.62	276.717	127.04	-1.1231	4.49e-05	0.0002934	Down	Full=Acyl carrier protein 1, chloroplastic; Short=ACP 1; Flags: Precursor [Casuarina glauca]
154	Bni01T000946	8184	6042	3040	1	0	600.6	434.78	229.58	0.07	0	421.653	0.035	-13.5564	5.05e-20	3.59e-18	Down	Full=Acyl transferase 15; Short=OsAT15 [Oryza sativa Japonica Group]
255	Bni01T001413	3773	3166	3124	672	724	276.89	227.83	235.93	46.45	61.95	246.883	54.2	-2.1875	1.7e-24	1.73e-22	Down	Full=Acyl-CoA-binding domain-containing protein 5; Short=Acyl-CoA binding protein 5; Short=OsACBP5; Flags: Precursor [Oryza sativa Japonica Group]
2843	Bni10T015015	156	152	65	61	42	11.45	10.94	4.91	4.22	3.59	9.1	3.905	-1.2205	0.0159432	0.0451379	Down	Full=Acyl-CoA--sterol O-acyltransferase 1; AltName: Full=Sterol O-acyltransferase 1 [Arabidopsis thaliana]
582	Bni02T003208	688	619	616	1170	1309	50.49	44.54	46.52	80.87	112	47.1833	96.435	1.0313	2.5e-06	2.25e-05	Up	Full=Acyltransferase-like protein At1g54570, chloroplastic; Flags: Precursor [Arabidopsis thaliana]
2424	Bni09T012951	2194	2346	2254	4234	4523	161.01	168.82	170.22	292.67	387	166.683	339.835	1.0277	1.42e-08	2.05e-07	Up	Full=Adagio protein 3; AltName: Full=F-box only protein 2a; Short=FBX2a; AltName: Full=Flavin-binding kelch repeat F-box protein 1 [Arabidopsis thaliana]
192	Bni01T001104	1051	1098	995	2562	1871	77.13	79.01	75.14	177.1	160.09	77.0933	168.595	1.1289	6.56e-18	3.69e-16	Up	Full=Adenine phosphoribosyltransferase 5; Short=AtAPT5 [Arabidopsis thaliana]
2411	Bni09T012862	146	124	134	91	36	10.71	8.92	10.12	6.29	3.08	9.91667	4.685	-1.0818	0.00965002	0.0298665	Down	Full=Adenylate isopentenyltransferase; AltName: Full=Adenylate dimethylallyltransferase; AltName: Full=Cytokinin synthase [Humulus lupulus]
2784	Bni10T014717	2538	2718	2779	1143	1103	186.26	195.59	209.87	79.01	94.38	197.24	86.695	-1.1859	1.57e-13	4.99e-12	Down	Full=Adenylosuccinate lyase; Short=ASL; AltName: Full=Adenylosuccinase; Short=ASase [Haemophilus influenzae Rd KW20]
3498	Bni14T018737	28	49	41	130	95	2.05	3.53	3.1	8.99	8.13	2.89333	8.56	1.5649	9.24e-05	0.000555666	Up	Full=Adenylyl-sulfate kinase, chloroplastic; AltName: Full=ATP adenosine-5'-phosphosulfate 3'-phosphotransferase; AltName: Full=Adenosine-5'-phosphosulfate kinase; Short=APS kinase; Flags: Precursor [Catharanthus roseus]
3513	Bni14T018794	73	55	88	163	217	5.36	3.96	6.65	11.27	18.57	5.32333	14.92	1.4868	0.000241426	0.00128233	Up	Full=ADP-ribosylation factor 1 [Salix bakko]
880	Bni03T004771	0	0	0	29	29	0	0	0	2	2.48	0.001	2.24	11.1293	3.06e-06	2.69e-05	Up	Full=ADP-ribosylation factor-related protein 1; Short=ARF-related protein 1 [Bos taurus]
1169	Bni04T006178	54	39	62	203	95	3.96	2.81	4.68	14.03	8.13	3.81667	11.08	1.5376	0.000402643	0.00199394	Up	Full=AFP homolog 2; AltName: Full=Novel interactor of JAZ [Arabidopsis thaliana]
261	Bni01T001431	12	16	23	0	0	0.88	1.15	1.74	0	0	1.25667	0.001	-10.2954	0.00019266	0.00105511	Down	Full=Agamous-like MADS-box protein AGL104 [Arabidopsis thaliana]
187	Bni01T001075	0	1	0	76	28	0	0.07	0	5.25	2.4	0.0233333	3.825	7.3569	7.72e-07	7.81e-06	Up	Full=Agamous-like MADS-box protein AGL11; AltName: Full=Agamous like-protein 11; Short=VvAGL11; AltName: Full=MADS-box protein 5; Short=VvMADS5; AltName: Full=Protein SEED DEVELOPMENT INHIBITOR; AltName: Full=VvAG3; AltName: Full=VviAG3 [Vitis vinifera]
186	Bni01T001069	15	5	8	24	121	1.1	0.36	0.6	1.66	10.35	0.686667	6.005	3.1285	0.000990745	0.00435781	Up	Full=Agamous-like MADS-box protein AGL12; AltName: Full=Protein XAANTAL 1 [Arabidopsis thaliana]
2844	Bni10T015023	257	185	227	89	62	18.86	13.31	17.14	6.15	5.3	16.4367	5.725	-1.5216	7.59e-07	7.69e-06	Down	Full=Agamous-like MADS-box protein AGL15 [Arabidopsis thaliana]
3114	Bni12T016735	24	10	4	0	0	1.76	0.72	0.3	0	0	0.926667	0.001	-9.8559	0.00251914	0.0096332	Down	Full=Agamous-like MADS-box protein AGL15 [Brassica napus]
1752	Bni06T009244	215	154	75	1	0	15.78	11.08	5.66	0.07	0	10.84	0.035	-8.2748	7.78e-08	9.69e-07	Down	Full=Agamous-like MADS-box protein AGL75 [Arabidopsis thaliana]
1759	Bni06T009260	38	15	18	0	0	2.79	1.08	1.36	0	0	1.74333	0.001	-10.7676	5.49e-05	0.000350917	Down	Full=Agamous-like MADS-box protein AGL75 [Arabidopsis thaliana]
1760	Bni06T009263	90	69	20	1	0	6.6	4.97	1.51	0.07	0	4.36	0.035	-6.9608	2.59e-05	0.000180819	Down	Full=Agamous-like MADS-box protein AGL75 [Arabidopsis thaliana]
1868	Bni06T009748	91	113	68	83	498	6.68	8.13	5.14	5.74	42.61	6.65	24.175	1.8621	0.0116226	0.0347811	Up	Full=Agamous-like MADS-box protein AGL8 homolog [Solanum commersonii]
2634	Bni10T014036	511	431	483	1159	729	37.5	31.01	36.48	80.11	62.38	34.9967	71.245	1.0256	6.44e-07	6.67e-06	Up	Full=Agamous-like MADS-box protein AGL8 homolog [Solanum commersonii]
322	Bni01T001710	3528	3463	3231	652	253	258.91	249.2	244.01	45.07	21.65	250.707	33.36	-2.9098	2.32e-20	1.69e-18	Down	Full=Agamous-like MADS-box protein AP3; AltName: Full=VvAP3.1; AltName: Full=VviAP3a [Vitis vinifera]
166	Bni01T000986	32	26	0	0	0	2.35	1.87	0	0	0	1.40667	0.001	-10.4581	0.00811218	0.0259101	Down	Full=Agamous-like MADS-box protein MADS1; AltName: Full=Agamous homolog 1; Short=VvAG1; Short=VviAG1; AltName: Full=MADS-box protein 1; Short=Vvmads1 [Vitis vinifera]
2357	Bni08T012451	13	11	4	54	23	0.95	0.79	0.3	3.73	1.97	0.68	2.85	2.0674	0.00941783	0.0292843	Up	Full=Agamous-like MADS-box protein MADS3; AltName: Full=Agamous-like protein 6; Short=VvAGL6; Short=VviAGL6a; AltName: Full=MADS-box protein 3; Short=VvMADS3 [Vitis vinifera]
199	Bni01T001145	3032	2799	2518	8	6	222.51	201.42	190.16	0.55	0.51	204.697	0.53	-8.5933	2.26e-91	5.59e-88	Down	Full=Agamous-like MADS-box protein MADS9; AltName: Full=PISTILLATA-like protein; Short=VvPI; Short=VviPI; AltName: Full=Protein FLESHLESS BERRY; AltName: Full=VvMADS9 [Vitis vinifera]
3566	Bni14T019035	5339	5007	3820	1652	577	391.82	360.3	288.49	114.19	49.37	346.87	81.78	-2.0846	1.1e-08	1.63e-07	Down	Full=Agamous-like MADS-box protein TM6; AltName: Full=VvAP3.2; AltName: Full=VviAP3b [Vitis vinifera]
2104	Bni07T011044	1766	1369	759	307	584	129.6	98.51	57.32	21.22	49.97	95.1433	35.595	-1.4184	0.0028163	0.0106121	Down	Full=Alanine--glyoxylate aminotransferase 2 homolog 2, mitochondrial; AltName: Full=Beta-alanine-pyruvate aminotransferase 2; Flags: Precursor [Arabidopsis thaliana]
14	Bni01T000133	153	135	152	215	940	11.23	9.71	11.48	14.86	80.43	10.8067	47.645	2.1404	0.000565075	0.00267706	Up	Full=Alcohol dehydrogenase 1 [Trifolium repens]
145	Bni01T000914	34	30	11	7	3	2.5	2.16	0.83	0.48	0.26	1.83	0.37	-2.3062	0.0137896	0.0401057	Down	Full=Alcohol dehydrogenase 1 [Trifolium repens]
181	Bni01T001047	47	27	20	9	4	3.45	1.94	1.51	0.62	0.34	2.3	0.48	-2.2605	0.00550881	0.0188984	Down	Full=Alcohol dehydrogenase-like 2 [Arabidopsis thaliana]
2023	Bni07T010602	88	96	51	207	191	6.46	6.91	3.85	14.31	16.34	5.74	15.325	1.4168	0.000150402	0.000849265	Up	Full=Alcohol dehydrogenase-like 4 [Arabidopsis thaliana]
2732	Bni10T014481	1182	1049	975	1995	4222	86.74	75.49	73.63	137.9	361.25	78.62	249.575	1.6665	2.68e-05	0.000186288	Up	Full=Aldehyde dehydrogenase family 2 member B4, mitochondrial; Short=ALDH2a; Flags: Precursor [Arabidopsis thaliana]
2556	Bni09T013632	9567	8781	6756	340	189	702.1	631.88	510.21	23.5	16.17	614.73	19.835	-4.9538	2.29e-88	4.94e-85	Down	Full=Aldehyde dehydrogenase family 2 member B7, mitochondrial; Short=ALDH2b; Flags: Precursor [Arabidopsis thaliana]
3565	Bni14T019034	1777	1924	2101	8225	3547	130.41	138.45	158.67	568.54	303.49	142.51	436.015	1.6133	2.16e-08	3.03e-07	Up	Full=Aldehyde dehydrogenase family 3 member F1 [Arabidopsis thaliana]
1395	Bni05T007272	655	632	624	1454	1077	48.07	45.48	47.12	100.51	92.15	46.89	96.33	1.0387	1.38e-13	4.47e-12	Up	Full=Aldehyde dehydrogenase family 3 member I1, chloroplastic; Short=AtALDH3; Short=Ath-ALDH3; Flags: Precursor [Arabidopsis thaliana]
1382	Bni05T007225	4354	4016	3760	0	0	319.53	288.99	283.96	0	0	297.493	0.001	-18.1825	4.88e-23	4.46e-21	Down	Full=Aldehyde oxidase GLOX; AltName: Full=Glyoxal oxidase; Short=VpGLOX; Flags: Precursor [Vitis pseudoreticulata]
1974	Bni07T010381	288	232	206	548	1482	21.14	16.69	15.56	37.88	126.8	17.7967	82.34	2.21	7.73e-06	6.19e-05	Up	Full=Aldehyde oxidase GLOX; AltName: Full=Glyoxal oxidase; Short=VpGLOX; Flags: Precursor [Vitis pseudoreticulata]
2536	Bni09T013541	2101	1590	721	1	4	154.19	114.42	54.45	0.07	0.34	107.687	0.205	-9.037	2.67e-30	4.28e-28	Down	Full=Aldehyde oxidase GLOX; AltName: Full=Glyoxal oxidase; Short=VpGLOX; Flags: Precursor [Vitis pseudoreticulata]
2703	Bni10T014370	25688	23271	16202	0	0	1885.18	1674.58	1223.58	0	0	1594.45	0.001	-20.6046	2.52e-30	4.06e-28	Down	Full=Aldehyde oxidase GLOX; AltName: Full=Glyoxal oxidase; Short=VpGLOX; Flags: Precursor [Vitis pseudoreticulata]
2300	Bni08T012134	619	411	4	0	4	45.43	29.58	0.3	0	0.34	25.1033	0.17	-7.2062	0.0025355	0.00969144	Down	Full=Aldehyde oxidase GLOX1; AltName: Full=Glyoxal oxidase 1; Flags: Precursor [Arabidopsis thaliana]
3183	Bni12T017050	277	279	345	972	474	20.33	20.08	26.05	67.19	40.56	22.1533	53.875	1.2821	1.18e-05	9e-05	Up	Full=Alpha carbonic anhydrase 1, chloroplastic; Short=AtaCA1; Short=AtalphaCA1; AltName: Full=Alpha carbonate dehydratase 1; Flags: Precursor [Arabidopsis thaliana]
1534	Bni05T007976	845	933	690	244	118	62.01	67.14	52.11	16.87	10.1	60.42	13.485	-2.1637	8.35e-14	2.82e-12	Down	Full=Alpha,alpha-trehalose-phosphate synthase [UDP-forming] 1; AltName: Full=Trehalose-6-phosphate synthase 1; Short=AtTPS1 [Arabidopsis thaliana]
1230	Bni04T006466	37	23	8	548	900	2.72	1.66	0.6	37.88	77.01	1.66	57.445	5.1129	2.68e-18	1.58e-16	Up	Full=Alpha/beta hydrolase domain-containing protein 17C; Short=Abhydrolase domain-containing protein 17C [Homo sapiens]
3411	Bni13T018193	91	77	75	310	748	6.68	5.54	5.66	21.43	64	5.96	42.715	2.8414	6.26e-09	9.75e-08	Up	Full=Alpha-1,3-arabinosyltransferase XAT3; AltName: Full=Xylan arabinosyltransferase 3; Short=OsXAT3 [Oryza sativa Japonica Group]
3101	Bni12T016637	534	577	585	60	73	39.19	41.52	44.18	4.15	6.25	41.63	5.2	-3.001	6.81e-31	1.13e-28	Down	Full=Alpha-dioxygenase 1; Short=Alpha DOX1; AltName: Full=Fatty acid dioxygenase AlphaDOX1; AltName: Full=Pathogen-induced oxygenase; AltName: Full=Plant alpha dioxygenase 1; Flags: Precursor [Arabidopsis thaliana]
2801	Bni10T014798	1353	949	471	329	141	99.29	68.29	35.57	22.74	12.06	67.7167	17.4	-1.9604	4.94e-05	0.00031957	Down	Full=Alpha-dioxygenase 2; Short=Alpha DOX2; AltName: Full=Fatty acid dioxygenase AlphaDOX2; Flags: Precursor [Arabidopsis thaliana]
1311	Bni05T006898	0	10	8	55	250	0	0.72	0.6	3.8	21.39	0.44	12.595	4.8392	1.17e-05	8.92e-05	Up	Full=Alpha-galactosidase; AltName: Full=Alpha-D-galactoside galactohydrolase; AltName: Full=Melibiase; Flags: Precursor [Oryza sativa Japonica Group]
2106	Bni07T011051	311	232	209	84	113	22.82	16.69	15.78	5.81	9.67	18.43	7.74	-1.2517	0.000705052	0.00323979	Down	Full=Alpha-soluble NSF attachment protein 2; Short=Alpha-SNAP2; AltName: Full=N-ethylmaleimide-sensitive factor attachment protein alpha 2 [Arabidopsis thaliana]
3279	Bni13T017617	136	140	136	297	293	9.98	10.07	10.27	20.53	25.07	10.1067	22.8	1.1737	6.29e-07	6.55e-06	Up	Full=Alternative NAD(P)H-ubiquinone oxidoreductase C1, chloroplastic/mitochondrial; AltName: Full=Alternative NADH dehydrogenase NDC1; AltName: Full=Demethylphylloquinone reductase NDC1; AltName: Full=NADH:ubiquinone reductase (non-electrogenic) NDC1; Flags: Precursor [Arabidopsis thaliana]
1749	Bni06T009238	47	30	30	213	79	3.45	2.16	2.27	14.72	6.76	2.62667	10.74	2.0317	8.25e-05	0.000504809	Up	Full=Aluminum-activated malate transporter 13; Short=AtALMT13 [Arabidopsis thaliana]
2059	Bni07T010781	59	47	61	123	181	4.33	3.38	4.61	8.5	15.49	4.10667	11.995	1.5464	0.00024823	0.00131363	Up	Full=Aluminum-activated malate transporter 14; Short=AtALMT14 [Arabidopsis thaliana]
2417	Bni09T012896	874	785	725	792	3382	64.14	56.49	54.75	54.75	289.37	58.46	172.06	1.5574	0.00681513	0.0224267	Up	Full=Aluminum-activated malate transporter 6; Short=AtALMT6 [Arabidopsis thaliana]
93	Bni01T000672	31	44	41	73	75	2.28	3.17	3.1	5.05	6.42	2.85	5.735	1.0088	0.0144973	0.0417644	Up	Full=Amino acid permease 6; AltName: Full=Amino acid transporter AAP6 [Arabidopsis thaliana]
1987	Bni07T010462	72	44	21	0	0	5.28	3.17	1.59	0	0	3.34667	0.001	-11.7085	2e-06	1.84e-05	Down	Full=Amino acid transporter AVT1D; Short=AtAvt1D [Arabidopsis thaliana]
1158	Bni04T006129	2024	1916	1745	2938	4185	148.54	137.88	131.78	203.09	358.08	139.4	280.585	1.0092	0.000278237	0.00145258	Up	Full=Amino acid transporter AVT6A; Short=AtAvt6A [Arabidopsis thaliana]
815	Bni03T004511	666	625	540	1274	2229	48.88	44.98	40.78	88.06	190.72	44.88	139.39	1.635	3.4e-06	2.97e-05	Up	Full=Amino acid transporter AVT6C; Short=AtAvt6C [Arabidopsis thaliana]
791	Bni03T004390	789	547	205	14	6	57.9	39.36	15.48	0.97	0.51	37.58	0.74	-5.6663	4.21e-18	2.44e-16	Down	Full=Amino-acid permease BAT1 homolog [Oryza sativa Japonica Group]
1944	Bni07T010196	644	598	408	1922	1912	47.26	43.03	30.81	132.86	163.6	40.3667	148.23	1.8766	5.51e-13	1.65e-11	Up	Full=Ammonium transporter 2 member 1; Short=OsAMT2;1 [Oryza sativa Japonica Group]
3584	Bni14T019135	6	7	9	0	0	0.44	0.5	0.68	0	0	0.54	0.001	-9.0768	0.00827349	0.0263425	Down	Full=Ammonium transporter 2 member 3; Short=Ammonium transporter 2;3; Short=MtAMT2;3 [Medicago truncatula]
592	Bni02T003254	14	14	14	0	0	1.03	1.01	1.06	0	0	1.03333	0.001	-10.0131	0.000383361	0.00191271	Down	Full=Ammonium transporter 2 member 4; Short=Ammonium transporter 2;4; Short=MtAMT2;4 [Medicago truncatula]
149	Bni01T000926	124	135	127	3	2	9.1	9.71	9.59	0.21	0.17	9.46667	0.19	-5.6388	6.22e-15	2.47e-13	Down	Full=Ammonium transporter 2 member 5; Short=Ammonium transporter 2;5; Short=MtAMT2;5 [Medicago truncatula]
2922	Bni11T015566	1886	1610	1283	763	700	138.41	115.86	96.89	52.74	59.89	117.053	56.315	-1.0556	4.88e-06	4.1e-05	Down	Full=Ankyrin repeat domain-containing protein 13C-B [Xenopus laevis]
378	Bni02T002086	335	348	290	932	723	24.58	25.04	21.9	64.42	61.86	23.84	63.14	1.4052	2.2e-16	1.05e-14	Up	Full=Ankyrin repeat domain-containing protein EMB506, chloroplastic; AltName: Full=Protein EMBRYO DEFECTIVE 506; Flags: Precursor [Arabidopsis thaliana]
1200	Bni04T006349	159	187	153	21	40	11.67	13.46	11.55	1.45	3.42	12.2267	2.435	-2.328	1.88e-07	2.18e-06	Down	Full=Ankyrin repeat domain-containing protein EMB506, chloroplastic; AltName: Full=Protein EMBRYO DEFECTIVE 506; Flags: Precursor [Arabidopsis thaliana]
2262	Bni08T011914	18	18	9	0	0	1.32	1.3	0.68	0	0	1.1	0.001	-10.1033	0.000403256	0.0019964	Down	Full=Ankyrin repeat-containing protein ITN1; AltName: Full=Protein INCREASED TOLERANCE TO NACL [Arabidopsis thaliana]
785	Bni03T004361	2988	3092	2935	6944	8060	219.28	222.5	221.65	480	689.64	221.143	584.82	1.403	1.02e-11	2.54e-10	Up	Full=Annexin D4; AltName: Full=AnnAt4 [Arabidopsis thaliana]
2387	Bni08T012601	307	225	101	0	0	22.53	16.19	7.63	0	0	15.45	0.001	-13.9153	7.93e-11	1.69e-09	Down	Full=Anthocyanidin 3-O-glucoside 2'''-O-xylosyltransferase; Short=A3G2''XylT [Arabidopsis thaliana]
1989	Bni07T010471	50	65	47	305	114	3.67	4.68	3.55	21.08	9.75	3.96667	15.415	1.9583	1.26e-05	9.53e-05	Up	Full=Anthocyanidin 3-O-glucosyltransferase 4; AltName: Full=Flavonol 3-O-glucosyltransferase 4; AltName: Full=UDP-glucose flavonoid 3-O-glucosyltransferase 4 [Manihot esculenta]
3543	Bni14T018939	60	63	88	0	0	4.4	4.53	6.65	0	0	5.19333	0.001	-12.3424	2.57e-08	3.57e-07	Down	Full=Anthocyanidin 3-O-glucosyltransferase 5; AltName: Full=Flavonol 3-O-glucosyltransferase 5; AltName: Full=UDP-glucose flavonoid 3-O-glucosyltransferase 5 [Manihot esculenta]
942	Bni03T005086	152	143	181	1000	348	11.15	10.29	13.67	69.12	29.78	11.7033	49.45	2.0791	1.85e-07	2.16e-06	Up	Full=Anthocyanidin 3-O-glucosyltransferase 7; AltName: Full=Flavonol 3-O-glucosyltransferase 7; AltName: Full=UDP-glucose flavonoid 3-O-glucosyltransferase 7 [Manihot esculenta]
1335	Bni05T007005	3522	3869	3740	9998	4868	258.47	278.41	282.45	691.1	416.52	273.11	553.81	1.0199	2.49e-05	0.000174359	Up	Full=Anthocyanidin reductase ((2S)-flavan-3-ol-forming); Short=VvANR [Vitis vinifera]
2961	Bni11T015784	6	7	15	67	37	0.44	0.5	1.13	4.63	3.17	0.69	3.9	2.4988	0.000322121	0.00164859	Up	Full=Anthocyanidin-3-O-glucoside rhamnosyltransferase; AltName: Full=Anthocyanin rhamnosyl transferase [Petunia x hybrida]
2267	Bni08T011932	17	20	22	791	334	1.25	1.44	1.66	54.68	28.58	1.45	41.63	4.8435	1.28e-31	2.32e-29	Up	Full=Anthocyanin regulatory C1 protein [Zea mays]
805	Bni03T004466	4	6	1	7	230	0.29	0.43	0.08	0.48	19.68	0.266667	10.08	5.2403	7.55e-05	0.000467211	Up	Full=Anthranilate N-benzoyltransferase protein 1; AltName: Full=Anthranilate N-hydroxycinnamoyl/benzoyltransferase 1 [Dianthus caryophyllus]
3311	Bni13T017759	13	4	1	219	224	0.95	0.29	0.08	15.14	19.17	0.44	17.155	5.285	7.36e-13	2.17e-11	Up	Full=AP2/ERF and B3 domain-containing transcription factor At1g51120; AltName: Full=RAV1-like ethylene-responsive transcription factor At1g51120 [Arabidopsis thaliana]
237	Bni01T001352	188	297	331	1949	851	13.8	21.37	25	134.72	72.81	20.0567	103.765	2.3712	7.94e-11	1.69e-09	Up	Full=AP2-like ethylene-responsive transcription factor AIL6; AltName: Full=Protein AINTEGUMENTA-LIKE 6 [Arabidopsis thaliana]
763	Bni03T004265	420	372	263	28	10	30.82	26.77	19.86	1.94	0.86	25.8167	1.4	-4.2048	5.58e-22	4.68e-20	Down	Full=AP2-like ethylene-responsive transcription factor At1g79700 [Arabidopsis thaliana]
3478	Bni14T018586	94	83	74	41	7	6.9	5.97	5.59	2.83	0.6	6.15333	1.715	-1.8432	0.00636182	0.0212097	Down	Full=AP2-like ethylene-responsive transcription factor PLT1; AltName: Full=Protein AINTEGUMENTA-LIKE 3; AltName: Full=Protein PLETHORA 1 [Arabidopsis thaliana]
3495	Bni14T018708	110	134	142	382	200	8.07	9.64	10.72	26.41	17.11	9.47667	21.76	1.1992	0.000101266	0.000601915	Up	Full=AP2-like ethylene-responsive transcription factor PLT1; AltName: Full=Protein AINTEGUMENTA-LIKE 3; AltName: Full=Protein PLETHORA 1 [Arabidopsis thaliana]
310	Bni01T001675	1043	954	1001	399	305	76.54	68.65	75.6	27.58	26.1	73.5967	26.84	-1.4553	1.12e-19	7.72e-18	Down	Full=AP-4 complex subunit mu; AltName: Full=Adaptor protein complex AP-4 subunit mu; AltName: Full=Adaptor protein-4 mu-adaptin; AltName: Full=Adaptor-related protein complex 4 subunit mu; AltName: Full=At-muC-Ad; AltName: Full=Mu4-adaptin [Arabidopsis thaliana]
2290	Bni08T012070	93	123	90	49	22	6.83	8.85	6.8	3.39	1.88	7.49333	2.635	-1.5078	0.000560619	0.0026574	Down	Full=AP-4 complex subunit sigma; AltName: Full=AP-4 adaptor complex subunit sigma; AltName: Full=Adaptor-related protein complex 4 subunit sigma; AltName: Full=Sigma subunit of AP-4; AltName: Full=Sigma4-adaptin [Arabidopsis thaliana]
702	Bni03T003931	18	19	21	55	172	1.32	1.37	1.59	3.8	14.72	1.42667	9.26	2.6984	7.34e-05	0.000455636	Up	Full=APETALA2-like protein 1 [Oryza sativa Indica Group]
1461	Bni05T007605	77	75	96	38	25	5.65	5.4	7.25	2.63	2.14	6.1	2.385	-1.3548	0.000875179	0.00391327	Down	Full=APO protein 1, chloroplastic; AltName: Full=Accumulation of photosystem I protein 1; AltName: Full=Protein ACCUMULATION OF PHOTOSYSTEM ONE 1; Flags: Precursor [Arabidopsis thaliana]
1539	Bni05T007989	2119	1298	289	309	183	155.51	93.4	21.83	21.36	15.66	90.2467	18.51	-2.2856	0.0159705	0.0452004	Down	Full=Aquaporin NIP1-1; AltName: Full=NOD26-like intrinsic protein 1-1; AltName: Full=OsNIP1;1 [Oryza sativa Japonica Group]
1181	Bni04T006257	13	15	6	0	0	0.95	1.08	0.45	0	0	0.826667	0.001	-9.6912	0.00177105	0.00712919	Down	Full=Aquaporin NIP2-1; AltName: Full=NOD26-like intrinsic protein 2-1; AltName: Full=ZmNIP2-1; AltName: Full=ZmNIP2;1 [Zea mays]
1603	Bni06T008372	260	266	165	1090	1154	19.08	19.14	12.46	75.35	98.74	16.8933	87.045	2.3653	3.06e-16	1.44e-14	Up	Full=Aquaporin NIP3-1; AltName: Full=NOD26-like intrinsic protein 3-1; AltName: Full=OsNIP3;1 [Oryza sativa Japonica Group]
1578	Bni05T008181	7523	5559	2910	86	64	552.09	400.03	219.76	5.94	5.48	390.627	5.71	-6.0962	1.4e-51	5.5e-49	Down	Full=Aquaporin NIP6-1; AltName: Full=NOD26-like intrinsic protein 6-1; Short=AtNIP6;1 [Arabidopsis thaliana]
1579	Bni05T008183	32	38	30	86	285	2.35	2.73	2.27	5.94	24.39	2.45	15.165	2.6299	3.92e-05	0.000260423	Up	Full=Aquaporin NIP6-1; AltName: Full=NOD26-like intrinsic protein 6-1; Short=AtNIP6;1 [Arabidopsis thaliana]
1644	Bni06T008604	392	401	374	1171	568	28.77	28.86	28.24	80.94	48.6	28.6233	64.77	1.1781	1.09e-05	8.39e-05	Up	Full=Aquaporin PIP1-2; Short=AtPIP1;2; AltName: Full=Plasma membrane intrinsic protein 1b; Short=PIP1b; AltName: Full=Transmembrane protein A; Short=AthH2; Short=TMP-A [Arabidopsis thaliana]
972	Bni04T005315	182	166	107	98	39	13.36	11.95	8.08	6.77	3.34	11.13	5.055	-1.1387	0.0134015	0.039155	Down	Full=Aquaporin SIP1-1; AltName: Full=OsSIP1;1; AltName: Full=Small basic intrinsic protein 1-1 [Oryza sativa Japonica Group]
89	Bni01T000636	742	572	486	2033	861	54.45	41.16	36.7	140.53	73.67	44.1033	107.1	1.28	0.0001776	0.000986076	Up	Full=Aquaporin TIP4-1; AltName: Full=Epsilon-tonoplast intrinsic protein; Short=Epsilon-TIP; AltName: Full=Tonoplast intrinsic protein 4-1; Short=AtTIP4;1 [Arabidopsis thaliana]
2312	Bni08T012186	805	1098	1079	500	247	59.08	79.01	81.49	34.56	21.13	73.1933	27.845	-1.3943	1.42e-06	1.35e-05	Down	Full=ARF guanine-nucleotide exchange factor GNL2; AltName: Full=Protein GNOM-like 2 [Arabidopsis thaliana]
2313	Bni08T012187	74	27	14	1	2	5.43	1.94	1.06	0.07	0.17	2.81	0.12	-4.5495	0.000225397	0.0012106	Down	Full=ARF guanine-nucleotide exchange factor GNL2; AltName: Full=Protein GNOM-like 2 [Arabidopsis thaliana]
1746	Bni06T009222	684	740	839	226	121	50.2	53.25	63.36	15.62	10.35	55.6033	12.985	-2.0983	3.23e-16	1.5e-14	Down	Full=ARM REPEAT PROTEIN INTERACTING WITH ABF2; Short=ARIA [Arabidopsis thaliana]
973	Bni04T005316	335	270	173	127	76	24.58	19.43	13.07	8.78	6.5	19.0267	7.64	-1.3164	0.000649024	0.00302009	Down	Full=Arogenate dehydratase/prephenate dehydratase 1, chloroplastic; Short=AtADT1; Short=AtPDT1; Flags: Precursor [Arabidopsis thaliana]
813	Bni03T004506	13	19	22	372	503	0.95	1.37	1.66	25.71	43.04	1.32667	34.375	4.6955	3.19e-29	4.67e-27	Up	Full=Arogenate dehydrogenase 1, chloroplastic; AltName: Full=TYRATC; AltName: Full=TyrAAT1; Flags: Precursor [Arabidopsis thaliana]
506	Bni02T002792	11446	11556	10359	19568	27005	839.99	831.57	782.31	1352.62	2310.62	817.957	1831.62	1.163	7.62e-06	6.11e-05	Up	Full=Asparagine synthetase [glutamine-hydrolyzing] 1; AltName: Full=Glutamine-dependent asparagine synthetase 1 [Lotus japonicus]
2794	Bni10T014761	109	83	101	57	37	8	5.97	7.63	3.94	3.17	7.2	3.555	-1.0181	0.00637482	0.0212449	Down	Full=Asparagine-rich protein; Short=Protein ARP [Saccharomyces cerevisiae S288C]
3289	Bni13T017673	13	10	4	0	0	0.95	0.72	0.3	0	0	0.656667	0.001	-9.359	0.0055213	0.0189375	Down	Full=Aspartic protease 1; Flags: Precursor [Caenorhabditis elegans]
1043	Bni04T005641	256	251	220	599	503	18.79	18.06	16.61	41.41	43.04	17.82	42.225	1.2446	1.85e-11	4.35e-10	Up	Full=Aspartic proteinase PCS1; AltName: Full=Aspartic protease 38; Short=AtASP38; AltName: Full=Protein EMBRYO DEFECTIVE 24; AltName: Full=Protein PROMOTION OF CELL SURVIVAL 1; Flags: Precursor [Arabidopsis thaliana]
208	Bni01T001194	2954	3725	3736	8027	5698	216.79	268.05	282.14	554.86	487.54	255.66	521.2	1.0276	1.68e-09	2.89e-08	Up	Full=Aspartyl protease family protein At5g10770; Flags: Precursor [Arabidopsis thaliana]
3288	Bni13T017672	15	9	8	0	0	1.1	0.65	0.6	0	0	0.783333	0.001	-9.6135	0.00193988	0.00769404	Down	Full=Aspartyl protease UND; AltName: Full=Protein UNDEAD; Flags: Precursor [Arabidopsis thaliana]
3196	Bni12T017129	15	24	20	140	59	1.1	1.73	1.51	9.68	5.05	1.44667	7.365	2.348	9.06e-06	7.14e-05	Up	Full=AT-hook motif nuclear-localized protein 1 [Arabidopsis thaliana]
373	Bni02T002067	51	21	5	0	0	3.74	1.51	0.38	0	0	1.87667	0.001	-10.874	0.000241057	0.00128156	Down	Full=AT-hook motif nuclear-localized protein 11 [Arabidopsis thaliana]
107	Bni01T000756	552	579	495	356	173	40.51	41.66	37.38	24.61	14.8	39.85	19.705	-1.016	0.000284838	0.00148204	Down	Full=AT-hook motif nuclear-localized protein 17 [Arabidopsis thaliana]
659	Bni03T003697	6	11	7	94	48	0.44	0.79	0.53	6.5	4.11	0.586667	5.305	3.1767	2.74e-07	3.07e-06	Up	Full=AT-hook motif nuclear-localized protein 20 [Arabidopsis thaliana]
1081	Bni04T005837	2281	1986	1305	915	642	167.4	142.91	98.55	63.25	54.93	136.287	59.09	-1.2057	1.79e-05	0.000130323	Down	Full=AT-hook motif nuclear-localized protein 22 [Arabidopsis thaliana]
426	Bni02T002420	70	79	167	354	156	5.14	5.68	12.61	24.47	13.35	7.81	18.91	1.2758	0.0125467	0.0370396	Up	Full=AT-hook motif nuclear-localized protein 24 [Arabidopsis thaliana]
2223	Bni08T011757	80	104	68	171	305	5.87	7.48	5.14	11.82	26.1	6.16333	18.96	1.6212	0.000293563	0.00152091	Up	Full=ATP synthase delta chain, chloroplastic; AltName: Full=F-ATPase delta chain; Flags: Precursor [Pisum sativum]
1274	Bni05T006745	507	426	433	221	203	37.21	30.66	32.7	15.28	17.37	33.5233	16.325	-1.0381	2.05e-06	1.88e-05	Down	Full=ATP synthase mitochondrial F1 complex assembly factor 1; Flags: Precursor [Xenopus tropicalis]
3600	BniUnT019248	6	17	64	226	81	0.44	1.22	4.83	15.62	6.93	2.16333	11.275	2.3818	0.009484	0.0294582	Up	Full=ATP synthase subunit alpha, chloroplastic; AltName: Full=ATP synthase F1 sector subunit alpha; AltName: Full=F-ATPase subunit alpha [Morus indica]
3602	BniUnT019265	61	102	146	718	273	4.48	7.34	11.03	49.63	23.36	7.61667	36.495	2.2605	3.14e-06	2.76e-05	Up	Full=ATP synthase subunit alpha, mitochondrial [Pisum sativum]
3598	BniUnT019237	19	36	61	282	78	1.39	2.59	4.61	19.49	6.67	2.86333	13.08	2.1916	0.00106164	0.00462491	Up	Full=ATP synthase subunit beta, chloroplastic; AltName: Full=ATP synthase F1 sector subunit beta; AltName: Full=F-ATPase subunit beta [Morus indica]
21	Bni01T000166	5327	4529	2476	914	577	390.93	325.91	186.99	63.18	49.37	301.277	56.275	-2.4205	2.43e-12	6.64e-11	Down	Full=ATP synthase subunit delta', mitochondrial; AltName: Full=F-ATPase delta' subunit; Flags: Precursor [Ipomoea batatas]
1459	Bni05T007594	479	481	402	1304	542	35.15	34.61	30.36	90.14	46.38	33.3733	68.26	1.0323	0.00123277	0.00524382	Up	Full=ATPase 10, plasma membrane-type; AltName: Full=Proton pump 10 [Arabidopsis thaliana]
3316	Bni13T017781	2137	1230	0	4	3	156.83	88.51	0	0.28	0.26	81.78	0.27	-8.2426	0.00276534	0.0104543	Down	Full=ATPase 6, plasma membrane-type; AltName: Full=Proton pump 6 [Arabidopsis thaliana]
3434	Bni13T018290	866	587	199	1	0	63.55	42.24	15.03	0.07	0	40.2733	0.035	-10.1683	5.04e-11	1.11e-09	Down	Full=ATPase 6, plasma membrane-type; AltName: Full=Proton pump 6 [Arabidopsis thaliana]
418	Bni02T002384	301	148	2	0	2	22.09	10.65	0.15	0	0.17	10.9633	0.085	-7.011	0.00303942	0.0113282	Down	Full=ATPase 8, plasma membrane-type; AltName: Full=Proton pump 8 [Arabidopsis thaliana]
1018	Bni04T005505	637	393	54	0	0	46.75	28.28	4.08	0	0	26.37	0.001	-14.6866	2.28e-07	2.59e-06	Down	Full=ATPase 9, plasma membrane-type; AltName: Full=Proton pump 9 [Arabidopsis thaliana]
1575	Bni05T008169	221	134	23	26	17	16.22	9.64	1.74	1.8	1.45	9.2	1.625	-2.5012	0.00380901	0.01377	Down	Full=ATPase 9, plasma membrane-type; AltName: Full=Proton pump 9 [Arabidopsis thaliana]
1247	Bni04T006541	619	714	712	411	225	45.43	51.38	53.77	28.41	19.25	50.1933	23.83	-1.0747	8.21e-06	6.52e-05	Down	Full=ATPase family AAA domain-containing protein FIGL1; AltName: Full=AAA-ATPase FIDGETIN-LIKE 1 [Arabidopsis thaliana]
467	Bni02T002635	6787	5931	4808	3107	1810	498.08	426.8	363.1	214.77	154.87	429.327	184.82	-1.216	2.67e-07	3e-06	Down	Full=ATP-citrate synthase alpha chain protein 3; Short=ATP-citrate synthase A-3; AltName: Full=ATP-citrate lyase A-3; AltName: Full=Citrate cleavage enzyme A-3 [Arabidopsis thaliana]
1463	Bni05T007611	408	330	321	30	131	29.94	23.75	24.24	2.07	11.21	25.9767	6.64	-1.968	0.00189848	0.00755063	Down	Full=ATP-dependent 6-phosphofructokinase 2; Short=ATP-PFK 2; Short=Phosphofructokinase 2; AltName: Full=Phosphohexokinase 2 [Arabidopsis thaliana]
94	Bni01T000680	465	426	351	888	736	34.13	30.66	26.51	61.38	62.97	30.4333	62.175	1.0307	1.99e-07	2.3e-06	Up	Full=ATP-dependent 6-phosphofructokinase 3; Short=ATP-PFK 3; Short=Phosphofructokinase 3; AltName: Full=Phosphohexokinase 3 [Arabidopsis thaliana]
1418	Bni05T007389	37	52	81	0	0	2.72	3.74	6.12	0	0	4.19333	0.001	-12.0339	2.15e-07	2.47e-06	Down	Full=ATP-dependent 6-phosphofructokinase 3; Short=ATP-PFK 3; Short=Phosphofructokinase 3; AltName: Full=Phosphohexokinase 3 [Arabidopsis thaliana]
2291	Bni08T012071	167	173	166	342	440	12.26	12.45	12.54	23.64	37.65	12.4167	30.645	1.3034	8.42e-06	6.67e-05	Up	Full=ATP-dependent 6-phosphofructokinase 7; Short=ATP-PFK 7; Short=Phosphofructokinase 7; AltName: Full=Phosphohexokinase 7 [Arabidopsis thaliana]
1585	Bni05T008230	2538	2493	1797	209	143	186.26	179.4	135.71	14.45	12.24	167.123	13.345	-3.6465	8.17e-55	4.15e-52	Down	Full=ATP-dependent Clp protease proteolytic subunit 2, mitochondrial; AltName: Full=ATP-dependent Clp protease proteolytic subunit 1, mitochondrial; AltName: Full=Endopeptidase ClpP2; AltName: Full=nClpP7; Flags: Precursor [Arabidopsis thaliana]
134	Bni01T000891	134	227	330	1209	631	9.83	16.33	24.92	83.57	53.99	17.0267	68.78	2.0142	1.27e-06	1.22e-05	Up	Full=ATP-dependent DNA helicase DDM1; AltName: Full=Protein CHROMATIN REMODELING 1; Short=AtCHR1; Short=CHR01; AltName: Full=Protein DECREASED DNA METHYLATION 1; Short=AtDDM1; AltName: Full=Protein SOMNIFEROUS 1; AltName: Full=SWI/SNF2-related matrix-associated actin-dependent regulator of chromatin DDM1 [Arabidopsis thaliana]
143	Bni01T000911	776	1052	1296	126	32	56.95	75.7	97.87	8.71	2.74	76.84	5.725	-3.7465	3.06e-15	1.25e-13	Down	Full=ATP-dependent DNA helicase DDM1; AltName: Full=Protein CHROMATIN REMODELING 1; Short=AtCHR1; Short=CHR01; AltName: Full=Protein DECREASED DNA METHYLATION 1; Short=AtDDM1; AltName: Full=Protein SOMNIFEROUS 1; AltName: Full=SWI/SNF2-related matrix-associated actin-dependent regulator of chromatin DDM1 [Arabidopsis thaliana]
2852	Bni10T015062	674	560	1130	0	0	49.46	40.3	85.34	0	0	58.3667	0.001	-15.8329	1.06e-15	4.61e-14	Down	Full=ATP-dependent DNA helicase PIF2; AltName: Full=DNA repair and recombination helicase PIF2; Flags: Precursor [Trypanosoma brucei brucei TREU927]
2253	Bni08T011865	168	136	163	50	34	12.33	9.79	12.31	3.46	2.91	11.4767	3.185	-1.8493	2.54e-08	3.53e-07	Down	Full=ATP-dependent DNA helicase Q-like 3; AltName: Full=RecQ-like protein 3; Short=AtRecQ3; Short=AtRecQl3 [Arabidopsis thaliana]
2258	Bni08T011898	405	422	415	114	76	29.72	30.37	31.34	7.88	6.5	30.4767	7.19	-2.0836	8.67e-22	7.16e-20	Down	Full=ATP-dependent DNA helicase Q-like 3; AltName: Full=RecQ-like protein 3; Short=AtRecQ3; Short=AtRecQl3 [Arabidopsis thaliana]
2597	Bni09T013791	302	323	428	235	86	22.16	23.24	32.32	16.24	7.36	25.9067	11.8	-1.1345	0.00536673	0.018466	Down	Full=ATP-dependent DNA helicase Q-like 5; AltName: Full=RecQ-like protein 5; Short=AtRecQ5; Short=AtRecQl5 [Arabidopsis thaliana]
834	Bni03T004593	605	583	669	197	96	44.4	41.95	50.52	13.62	8.21	45.6233	10.915	-2.0635	1.84e-13	5.83e-12	Down	Full=ATP-dependent DNA helicase SRS2-like protein At4g25120; AltName: Full=AtSRS2 [Arabidopsis thaliana]
2632	Bni10T014028	920	829	947	433	288	67.52	59.65	71.52	29.93	24.64	66.23	27.285	-1.2794	2.64e-11	6.07e-10	Down	Full=ATP-dependent helicase HRQ1; AltName: Full=Homologous to recQ protein 1 [Saccharomyces cerevisiae S288C]
971	Bni04T005307	2500	2387	1991	784	516	183.47	171.77	150.36	54.19	44.15	168.533	49.17	-1.7772	8.38e-21	6.38e-19	Down	Full=ATP-dependent helicase rhp16; AltName: Full=DNA repair protein rhp16; AltName: Full=RAD16 homolog [Schizosaccharomyces pombe 972h-]
225	Bni01T001295	5527	4654	3496	2420	1914	405.61	334.9	264.02	167.28	163.77	334.843	165.525	-1.0164	1.66e-05	0.000122576	Down	Full=ATP-dependent zinc metalloprotease FTSH 4, mitochondrial; Short=AtFTSH4; Flags: Precursor [Arabidopsis thaliana]
3304	Bni13T017714	1790	1583	1351	963	469	131.36	113.91	102.03	66.57	40.13	115.767	53.35	-1.1177	5.57e-05	0.000355346	Down	Full=AUGMIN subunit 8; AltName: Full=QWRF motif-containing protein 8; AltName: Full=ROP1 enhancer 2 [Arabidopsis thaliana]
1495	Bni05T007767	157	132	82	49	56	11.52	9.5	6.19	3.39	4.79	9.07	4.09	-1.149	0.0097173	0.030037	Down	Full=Autophagy-related protein 8a; AltName: Full=Autophagy-related ubiquitin-like modifier ATG8a; Short=AtAPG8a; Short=Protein autophagy 8a; Flags: Precursor [Arabidopsis thaliana]
2778	Bni10T014690	652	504	357	226	157	47.85	36.27	26.96	15.62	13.43	37.0267	14.525	-1.35	3.27e-05	0.000221728	Down	Full=Autophagy-related protein 8i; AltName: Full=Autophagy-related ubiquitin-like modifier ATG8i; Short=AtAPG8i; Short=Protein autophagy 8i [Arabidopsis thaliana]
2397	Bni09T012728	292	256	213	689	847	21.43	18.42	16.09	47.63	72.47	18.6467	60.05	1.6872	4.05e-09	6.49e-08	Up	Full=Auxin efflux carrier component 3; Short=AtPIN3 [Arabidopsis thaliana]
13	Bni01T000132	85	71	90	448	157	6.24	5.11	6.8	30.97	13.43	6.05	22.2	1.8756	1.58e-05	0.000117236	Up	Full=Auxin efflux carrier component 6; Short=AtPIN6 [Arabidopsis thaliana]
561	Bni02T003084	223	163	45	0	0	16.37	11.73	3.4	0	0	10.5	0.001	-13.3581	4.76e-09	7.53e-08	Down	Full=Auxin response factor 10 [Arabidopsis thaliana]
712	Bni03T003995	829	874	841	482	332	60.84	62.89	63.51	33.32	28.41	62.4133	30.865	-1.0159	3.41e-10	6.51e-09	Down	Full=Auxin response factor 16 [Arabidopsis thaliana]
555	Bni02T003059	393	485	527	1460	1929	28.84	34.9	39.8	100.92	165.05	34.5133	132.985	1.946	9.95e-12	2.47e-10	Up	Full=Auxin response factor 4 [Arabidopsis thaliana]
1769	Bni06T009306	457	583	664	252	157	33.54	41.95	50.15	17.42	13.43	41.88	15.425	-1.441	7.68e-08	9.6e-07	Down	Full=Auxin response factor 4; AltName: Full=OsARF2 [Oryza sativa Japonica Group]
2245	Bni08T011848	908	930	799	1158	2370	66.64	66.92	60.34	80.05	202.78	64.6333	141.415	1.1296	0.00352987	0.012904	Up	Full=Auxin response factor 7; AltName: Full=Auxin-responsive protein IAA21/IAA23/IAA25; AltName: Full=Protein BIPOSTO; AltName: Full=Protein NON-PHOTOTROPIC HYPOCOTYL 4; AltName: Full=Protein TRANSPORT INHIBITOR RESPONSE 5 [Arabidopsis thaliana]
646	Bni03T003632	432	396	447	133	85	31.7	28.5	33.76	9.19	7.27	31.32	8.23	-1.9281	1.72e-16	8.28e-15	Down	Full=Auxin transporter protein 1; AltName: Full=Auxin influx carrier protein 1; AltName: Full=Polar auxin transport inhibitor-resistant protein 1 [Arabidopsis thaliana]
1638	Bni06T008573	212	307	420	1002	420	15.56	22.09	31.72	69.26	35.94	23.1233	52.6	1.1857	0.00333732	0.0122911	Up	Full=Auxin transporter-like protein 2; AltName: Full=AUX1-like protein 2 [Arabidopsis thaliana]
1761	Bni06T009275	104	122	85	27	11	7.63	8.78	6.42	1.87	0.94	7.61	1.405	-2.4373	3.34e-07	3.66e-06	Down	Full=Auxin-binding protein T85; Short=ABP; Flags: Precursor [Nicotiana tabacum]
2958	Bni11T015774	105	100	85	266	394	7.71	7.2	6.42	18.39	33.71	7.11	26.05	1.8734	2.68e-07	3.01e-06	Up	Full=Auxin-induced protein 22B; AltName: Full=Indole-3-acetic acid-induced protein ARG4 [Vigna radiata var. radiata]
2890	Bni11T015406	308	227	164	301	2838	22.6	16.33	12.39	20.81	242.83	17.1067	131.82	2.9459	0.00953409	0.0295872	Up	Full=Auxin-induced protein PCNT115 [Nicotiana tabacum]
2240	Bni08T011834	454	242	16	3	11	33.32	17.41	1.21	0.21	0.94	17.3133	0.575	-4.9122	0.00145299	0.00602148	Down	Full=Auxin-induced protein X10A [Glycine max]
1287	Bni05T006803	6042	5174	4649	9613	17889	443.41	372.32	351.09	664.49	1530.63	388.94	1097.56	1.4967	3.13e-05	0.000213296	Up	Full=Auxin-repressed 12.5 kDa protein [Fragaria x ananassa]
595	Bni02T003263	314	324	309	576	1352	23.04	23.32	23.34	39.82	115.68	23.2333	77.75	1.7426	7.18e-05	0.000447036	Up	Full=Auxin-responsive protein IAA1; AltName: Full=Indoleacetic acid-induced protein 1 [Arabidopsis thaliana]
1553	Bni05T008046	607	600	580	1274	1073	44.55	43.18	43.8	88.06	91.81	43.8433	89.935	1.0365	7.68e-14	2.61e-12	Up	Full=Auxin-responsive protein IAA1; AltName: Full=Indoleacetic acid-induced protein 1 [Oryza sativa Japonica Group]
2957	Bni11T015772	225	182	172	274	540	16.51	13.1	12.99	18.94	46.2	14.2	32.57	1.1977	0.00503431	0.0174754	Up	Full=Auxin-responsive protein IAA14; AltName: Full=Indoleacetic acid-induced protein 14; AltName: Full=Protein SOLITARY ROOT [Arabidopsis thaliana]
1415	Bni05T007378	1605	1668	1502	2441	6658	117.79	120.03	113.43	168.73	569.68	117.083	369.205	1.6569	0.000275414	0.0014394	Up	Full=Auxin-responsive protein IAA2; AltName: Full=Indoleacetic acid-induced protein 2 [Oryza sativa Japonica Group]
2302	Bni08T012139	805	986	988	1218	2263	59.08	70.95	74.61	84.19	193.63	68.2133	138.91	1.026	0.00478269	0.0167196	Up	Full=Auxin-responsive protein IAA27; AltName: Full=Auxin-induced protein 27; AltName: Full=Indoleacetic acid-induced protein 27; AltName: Full=Phytochrome-associated protein 2 [Arabidopsis thaliana]
1736	Bni06T009155	389	427	480	1596	715	28.55	30.73	36.25	110.32	61.18	31.8433	85.75	1.4291	1.79e-06	1.66e-05	Up	Full=Auxin-responsive protein IAA7; AltName: Full=Auxin resistant 2; AltName: Full=Indoleacetic acid-induced protein 7 [Arabidopsis thaliana]
2189	Bni08T011569	63	58	34	111	103	4.62	4.17	2.57	7.67	8.81	3.78667	8.24	1.1217	0.00765748	0.0246722	Up	Full=Auxin-responsive protein SAUR32; AltName: Full=Protein ABOLISHED APICAL HOOK MAINTENANCE 1; AltName: Full=Protein SMALL AUXIN UP RNA 32 [Arabidopsis thaliana]
2188	Bni08T011567	482	621	675	2295	925	35.37	44.69	50.98	158.64	79.15	43.68	118.895	1.4446	1.81e-05	0.000132049	Up	Full=Axial regulator YABBY 1; AltName: Full=Fl-54; AltName: Full=Protein ABNORMAL FLORAL ORGANS; AltName: Full=Protein FILAMENTOUS FLOWER; AltName: Full=Protein antherless [Arabidopsis thaliana]
2566	Bni09T013669	5	19	8	320	133	0.37	1.37	0.6	22.12	11.38	0.78	16.75	4.4245	1.68e-12	4.71e-11	Up	Full=Axial regulator YABBY 4; AltName: Full=Protein INNER NO OUTER [Arabidopsis thaliana]
428	Bni02T002428	166	106	63	0	0	12.18	7.63	4.76	0	0	8.19	0.001	-12.9996	4.12e-09	6.58e-08	Down	Full=B3 domain-containing protein At2g24670 [Arabidopsis thaliana]
430	Bni02T002431	13	14	16	0	0	0.95	1.01	1.21	0	0	1.05667	0.001	-10.0453	0.000350957	0.00176944	Down	Full=B3 domain-containing protein At2g24670 [Arabidopsis thaliana]
423	Bni02T002417	25	12	4	0	0	1.83	0.86	0.3	0	0	0.996667	0.001	-9.961	0.00187477	0.00747357	Down	Full=B3 domain-containing protein At3g25182 [Arabidopsis thaliana]
1823	Bni06T009541	1017	1209	1521	256	142	74.63	87	114.87	17.7	12.15	92.1667	14.925	-2.6265	1.34e-20	1e-18	Down	Full=B3 domain-containing protein LOC_Os12g40080 [Oryza sativa Japonica Group]
3299	Bni13T017703	359	265	129	16	8	26.35	19.07	9.74	1.11	0.68	18.3867	0.895	-4.3606	9.82e-14	3.27e-12	Down	Full=B3 domain-containing protein LOC_Os12g40080 [Oryza sativa Japonica Group]
2805	Bni10T014813	1407	1021	691	172	79	103.26	73.47	52.18	11.89	6.76	76.3033	9.325	-3.0326	1.23e-14	4.6e-13	Down	Full=B3 domain-containing protein Os01g0905400 [Oryza sativa Japonica Group]
559	Bni02T003072	11	11	7	81	47	0.81	0.79	0.53	5.6	4.02	0.71	4.81	2.7601	1.8e-06	1.67e-05	Up	Full=B3 domain-containing protein Os04g0386900 [Oryza sativa Japonica Group]
2481	Bni09T013234	986	1063	1095	699	272	72.36	76.49	82.69	48.32	23.27	77.18	35.795	-1.1085	0.000786658	0.00357765	Down	Full=B3 domain-containing protein Os11g0197600 [Oryza sativa Japonica Group]
1710	Bni06T008983	14	17	9	0	0	1.03	1.22	0.68	0	0	0.976667	0.001	-9.9317	0.000645296	0.00300518	Down	Full=B3 domain-containing transcription factor FUS3; AltName: Full=Protein FUSCA3 [Arabidopsis thaliana]
3364	Bni13T017996	239	279	284	80	45	17.54	20.08	21.45	5.53	3.85	19.69	4.69	-2.0698	1.21e-12	3.42e-11	Down	Full=B3 domain-containing transcription repressor VAL2; AltName: Full=Protein HIGH-LEVEL EXPRESSION OF SUGAR-INDUCIBLE-LIKE 1; AltName: Full=Protein VP1/ABI3-LIKE 2 [Arabidopsis thaliana]
1762	Bni06T009280	705	783	757	188	168	51.74	56.34	57.17	13	14.37	55.0833	13.685	-2.009	1.72e-29	2.61e-27	Down	Full=Baculoviral IAP repeat-containing protein 3; AltName: Full=Apoptosis inhibitor 2; Short=API2; AltName: Full=Cellular inhibitor of apoptosis 2; Short=C-IAP2; AltName: Full=IAP homolog C; AltName: Full=Inhibitor of apoptosis protein 1; Short=hIAP-1; Short=hIAP1; AltName: Full=RING finger protein 49; AltName: Full=RING-type E3 ubiquitin transferase BIRC3; AltName: Full=TNFR2-TRAF-signaling comp…
499	Bni02T002780	182	197	204	264	598	13.36	14.18	15.41	18.25	51.17	14.3167	34.71	1.2777	0.00464695	0.0163243	Up	Full=BAG family molecular chaperone regulator 4; AltName: Full=Bcl-2-associated athanogene 4 [Arabidopsis thaliana]
2206	Bni08T011658	729	718	647	850	1767	53.5	51.67	48.86	58.76	151.19	51.3433	104.975	1.0318	0.00884059	0.0278656	Up	Full=BAG family molecular chaperone regulator 5, mitochondrial; AltName: Full=Bcl-2-associated athanogene 5; Flags: Precursor [Arabidopsis thaliana]
716	Bni03T004007	48	41	58	178	66	3.52	2.95	4.38	12.3	5.65	3.61667	8.975	1.3113	0.00695508	0.0227917	Up	Full=BAHD acyltransferase At5g47980 [Arabidopsis thaliana]
717	Bni03T004008	4	11	18	0	0	0.29	0.79	1.36	0	0	0.813333	0.001	-9.6677	0.00321608	0.011906	Down	Full=BAHD acyltransferase At5g47980 [Arabidopsis thaliana]
2831	Bni10T014943	105	86	52	0	0	7.71	6.19	3.93	0	0	5.94333	0.001	-12.5371	1.73e-08	2.49e-07	Down	Full=BAHD acyltransferase At5g47980 [Arabidopsis thaliana]
649	Bni03T003646	8	17	9	51	28	0.59	1.22	0.68	3.53	2.4	0.83	2.965	1.8368	0.00657866	0.0218216	Up	Full=BAHD acyltransferase DCR; AltName: Full=Protein DEFECTIVE IN CUTICULAR RIDGES; AltName: Full=Protein PERMEABLE LEAVES 3 [Arabidopsis thaliana]
895	Bni03T004829	3153	3371	3286	12481	5151	231.39	242.58	248.16	862.74	440.73	240.71	651.735	1.437	8.79e-07	8.76e-06	Up	Full=BAHD acyltransferase DCR; AltName: Full=Protein DEFECTIVE IN CUTICULAR RIDGES; AltName: Full=Protein PERMEABLE LEAVES 3 [Arabidopsis thaliana]
1960	Bni07T010295	313	308	258	476	974	22.97	22.16	19.48	32.9	83.34	21.5367	58.12	1.4322	0.000508267	0.0024397	Up	Full=BAHD acyltransferase DCR; AltName: Full=Protein DEFECTIVE IN CUTICULAR RIDGES; AltName: Full=Protein PERMEABLE LEAVES 3 [Arabidopsis thaliana]
1905	Bni06T009946	46	47	31	195	95	3.38	3.38	2.34	13.48	8.13	3.03333	10.805	1.8327	1.75e-05	0.00012813	Up	Full=Basic blue protein; AltName: Full=CBP; AltName: Full=Cusacyanin; AltName: Full=Plantacyanin [Cucumis sativus]
1654	Bni06T008660	4054	3638	2780	0	2	297.51	261.79	209.95	0	0.17	256.417	0.085	-11.5587	4.68e-29	6.68e-27	Down	Full=Basic helix-loop-helix protein A [Pisum sativum]
1157	Bni04T006126	63	66	40	17	7	4.62	4.75	3.02	1.18	0.6	4.13	0.89	-2.2143	0.000236346	0.00126195	Down	Full=Basic leucine zipper 43; Short=AtbZIP43; Short=bZIP protein 43 [Arabidopsis thaliana]
1811	Bni06T009473	53	49	37	115	112	3.89	3.53	2.79	7.95	9.58	3.40333	8.765	1.3648	0.000219338	0.00118395	Up	Full=Basic secretory protease; AltName: Full=Boswellia basic secretory protease; Short=BBSP [Boswellia serrata]
2371	Bni08T012502	80	69	74	326	157	5.87	4.97	5.59	22.53	13.43	5.47667	17.98	1.715	9.06e-07	8.99e-06	Up	Full=B-box zinc finger protein 24; AltName: Full=Salt tolerance protein [Arabidopsis thaliana]
2884	Bni11T015341	249	267	273	600	609	18.27	19.21	20.62	41.47	52.11	19.3667	46.79	1.2726	1.11e-09	1.96e-08	Up	Full=B-box zinc finger protein 24; AltName: Full=Salt tolerance protein [Arabidopsis thaliana]
324	Bni01T001712	51	61	41	123	97	3.74	4.39	3.1	8.5	8.3	3.74333	8.4	1.1661	0.000955626	0.00422541	Up	Full=B-box zinc finger protein 25; AltName: Full=Protein SALT TOLERANCE HOMOLOG 1; AltName: Full=Salt tolerance-like protein [Arabidopsis thaliana]
567	Bni02T003110	363	339	281	759	1441	26.64	24.39	21.22	52.47	123.3	24.0833	87.885	1.8676	1.58e-06	1.49e-05	Up	Full=BEL1-like homeodomain protein 4; Short=BEL1-like protein 4; AltName: Full=Protein SAWTOOTH 2 [Arabidopsis thaliana]
1860	Bni06T009699	950	931	770	1259	2064	69.72	66.99	58.15	87.03	176.6	64.9533	131.815	1.021	0.00200994	0.00794639	Up	Full=BEL1-like homeodomain protein 4; Short=BEL1-like protein 4; AltName: Full=Protein SAWTOOTH 2 [Arabidopsis thaliana]
3540	Bni14T018921	279	291	311	600	769	20.48	20.94	23.49	41.47	65.8	21.6367	53.635	1.3097	1.67e-06	1.57e-05	Up	Full=BEL1-like homeodomain protein 4; Short=BEL1-like protein 4; AltName: Full=Protein SAWTOOTH 2 [Arabidopsis thaliana]
1975	Bni07T010384	327	259	272	672	1236	24	18.64	20.54	46.45	105.76	21.06	76.105	1.8535	1.53e-06	1.44e-05	Up	Full=BEL1-like homeodomain protein 6; Short=BEL1-like protein 6 [Arabidopsis thaliana]
3166	Bni12T016973	1072	950	773	2716	7973	78.67	68.36	58.38	187.74	682.19	68.47	434.965	2.6674	4.59e-08	6.04e-07	Up	Full=BEL1-like homeodomain protein 6; Short=BEL1-like protein 6 [Arabidopsis thaliana]
1050	Bni04T005683	167	183	169	457	487	12.26	13.17	12.76	31.59	41.67	12.73	36.63	1.5248	9.76e-11	2.03e-09	Up	Full=Benzyl alcohol O-benzoyltransferase; AltName: Full=Benzoyl coenzyme A:benzyl alcohol benzoyl transferase [Nicotiana tabacum]
1351	Bni05T007076	346	327	253	449	837	25.39	23.53	19.11	31.04	71.62	22.6767	51.33	1.1786	0.00298686	0.0111695	Up	Full=Berberine bridge enzyme-like 13; Short=AtBBE-like 13; Flags: Precursor [Arabidopsis thaliana]
1353	Bni05T007082	29	34	32	125	85	2.13	2.45	2.42	8.64	7.27	2.33333	7.955	1.7695	1.92e-06	1.77e-05	Up	Full=Berberine bridge enzyme-like 13; Short=AtBBE-like 13; Flags: Precursor [Arabidopsis thaliana]
1355	Bni05T007085	43	22	27	84	259	3.16	1.58	2.04	5.81	22.16	2.26	13.985	2.6295	8.99e-05	0.00054187	Up	Full=Berberine bridge enzyme-like 22; Short=AtBBE-like 22; Flags: Precursor [Arabidopsis thaliana]
2058	Bni07T010773	72	70	60	293	219	5.28	5.04	4.53	20.25	18.74	4.95	19.495	1.9776	5.81e-14	1.99e-12	Up	Full=Beta-amyrin 11-oxidase; AltName: Full=Cytochrome P450 88D6 [Glycyrrhiza uralensis]
1361	Bni05T007112	187	158	122	323	387	13.72	11.37	9.21	22.33	33.11	11.4333	27.72	1.2777	8.82e-05	0.000533289	Up	Full=Beta-amyrin 28-monooxygenase; AltName: Full=Beta-amyrin 28-oxidase; AltName: Full=Cytochrome P450 716A15; Short=VvCYP716A15 [Vitis vinifera]
2951	Bni11T015760	106	98	115	0	4	7.78	7.05	8.68	0	0.34	7.83667	0.17	-5.5266	1.08e-11	2.66e-10	Down	Full=Beta-amyrin 28-monooxygenase; AltName: Full=Beta-amyrin 28-oxidase; AltName: Full=Cytochrome P450 716A17; Short=VvCYP716A17 [Vitis vinifera]
1886	Bni06T009857	565	556	473	2110	1224	41.46	40.01	35.72	145.85	104.73	39.0633	125.29	1.6814	6.64e-15	2.63e-13	Up	Full=Beta-amyrin synthase [Betula platyphylla]
3066	Bni12T016412	287	262	232	923	434	21.06	18.85	17.52	63.8	37.13	19.1433	50.465	1.3984	2.96e-06	2.61e-05	Up	Full=Beta-amyrin synthase; Short=BgbAS [Bruguiera gymnorhiza]
2015	Bni07T010589	9	15	25	54	42	0.66	1.08	1.89	3.73	3.59	1.21	3.66	1.5968	0.0121386	0.0360319	Up	Full=Beta-carotene isomerase D27, chloroplastic; AltName: Full=Protein DWARF-27 homolog; Short=AtD27; Flags: Precursor [Arabidopsis thaliana]
3016	Bni11T016119	5667	4334	2267	897	369	415.89	311.88	171.2	62	31.57	299.657	46.785	-2.6792	8.19e-10	1.47e-08	Down	Full=Beta-D-xylosidase 1; Short=AtBXL1; AltName: Full=Alpha-L-arabinofuranosidase; Flags: Precursor [Arabidopsis thaliana]
654	Bni03T003660	961	597	104	59	40	70.53	42.96	7.85	4.08	3.42	40.4467	3.75	-3.4311	5.26e-06	4.38e-05	Down	Full=Beta-fructofuranosidase, insoluble isoenzyme 1; AltName: Full=Cell wall beta-fructosidase 1; AltName: Full=Invertase 1; AltName: Full=Sucrose hydrolase 1; Flags: Precursor [Daucus carota]
1436	Bni05T007465	1399	1369	1010	3844	2617	102.67	98.51	76.28	265.71	223.92	92.4867	244.815	1.4044	1.79e-11	4.23e-10	Up	Full=Beta-fructofuranosidase, insoluble isoenzyme CWINV1; AltName: Full=Cell wall beta-fructosidase 1; Short=AtbetaFRUCT1; AltName: Full=Cell wall invertase 1; Short=AtcwINV1; AltName: Full=Sucrose hydrolase 1; Flags: Precursor [Arabidopsis thaliana]
1648	Bni06T008632	159	145	54	18	8	11.67	10.43	4.08	1.24	0.68	8.72667	0.96	-3.1843	1.4e-06	1.33e-05	Down	Full=Beta-galactosidase 11; Short=Lactase 11; Flags: Precursor [Arabidopsis thaliana]
315	Bni01T001691	1745	1816	1592	3671	18413	128.06	130.68	120.23	253.75	1575.47	126.323	914.61	2.856	0.00110971	0.00479992	Up	Full=Beta-galactosidase 5; Short=Lactase 5; Flags: Precursor [Arabidopsis thaliana]
1861	Bni06T009701	2080	2138	1724	1140	597	152.65	153.85	130.2	78.8	51.08	145.567	64.94	-1.1645	1.78e-06	1.65e-05	Down	Full=Beta-galactosidase 5; Short=Lactase 5; Flags: Precursor [Arabidopsis thaliana]
2799	Bni10T014795	281	147	24	0	0	20.62	10.58	1.81	0	0	11.0033	0.001	-13.4257	3.22e-08	4.36e-07	Down	Full=Beta-glucosidase 11; Short=Os4bglu11; Flags: Precursor [Oryza sativa Japonica Group]
2086	Bni07T010955	3762	3040	2557	13230	5393	276.08	218.76	193.11	914.51	461.44	229.317	687.975	1.585	1.46e-06	1.38e-05	Up	Full=Beta-glucosidase 17; Short=AtBGLU17; Flags: Precursor [Arabidopsis thaliana]
407	Bni02T002294	176	205	296	93	37	12.92	14.75	22.35	6.43	3.17	16.6733	4.8	-1.7964	5.1e-05	0.000329051	Down	Full=Beta-glucosidase 3; Short=Os1bglu3; Flags: Precursor [Oryza sativa Japonica Group]
2509	Bni09T013397	1711	1139	641	576	221	125.57	81.96	48.41	39.82	18.91	85.3133	29.365	-1.5387	0.00125008	0.00530142	Down	Full=Beta-glucosidase 40; Short=AtBGLU40; Flags: Precursor [Arabidopsis thaliana]
3035	Bni12T016222	620	650	736	2638	1293	45.5	46.77	55.58	182.35	110.63	49.2833	146.49	1.5716	2.09e-09	3.53e-08	Up	Full=Beta-glucosidase BoGH3B; AltName: Full=Glycosyl hydrolase family protein 3B; Short=BoGH3B; Flags: Precursor [Bacteroides ovatus ATCC 8483]
3346	Bni13T017923	2034	1942	1391	787	689	149.27	139.75	105.05	54.4	58.95	131.357	56.675	-1.2127	1.05e-07	1.28e-06	Down	Full=Beta-glucuronosyltransferase GlcAT14A; AltName: Full=GT14 family glucuronic acid transferase 1; Short=AtGlcAT14A [Arabidopsis thaliana]
2328	Bni08T012294	816	638	478	348	227	59.88	45.91	36.1	24.06	19.42	47.2967	21.74	-1.1214	0.000190171	0.00104565	Down	Full=Beta-glucuronosyltransferase GlcAT14B; AltName: Full=GT14 family glucuronic acid transferase 2; Short=AtGlcAT14B [Arabidopsis thaliana]
2484	Bni09T013240	48	61	48	173	475	3.52	4.39	3.62	11.96	40.64	3.84333	26.3	2.7746	4.87e-07	5.17e-06	Up	Full=Beta-glucuronosyltransferase GlcAT14C; AltName: Full=GT14 family glucuronic acid transferase 3; Short=AtGlcAT14C [Arabidopsis thaliana]
1774	Bni06T009315	18	16	3	78	37	1.32	1.15	0.23	5.39	3.17	0.9	4.28	2.2496	0.00675309	0.0222655	Up	Full=Bidirectional sugar transporter NEC1; AltName: Full=NEC1 [Petunia x hybrida]
10	Bni01T000124	1508	1077	629	506	243	110.67	77.5	47.5	34.98	20.79	78.5567	27.885	-1.4942	0.000354269	0.00178373	Down	Full=Bidirectional sugar transporter SWEET1; Short=AtSWEET1; AltName: Full=Protein SUGARS WILL EVENTUALLY BE EXPORTED TRANSPORTERS 1 [Arabidopsis thaliana]
2821	Bni10T014901	300	154	104	0	6	22.02	11.08	7.85	0	0.51	13.65	0.255	-5.7423	1.93e-10	3.82e-09	Down	Full=Bidirectional sugar transporter SWEET14; Short=OsSWEET14 [Oryza sativa Indica Group]
450	Bni02T002542	225	231	199	754	2298	16.51	16.62	15.03	52.12	196.62	16.0533	124.37	2.9537	5.86e-09	9.17e-08	Up	Full=Bidirectional sugar transporter SWEET16; Short=AtSWEET16; AltName: Full=Protein SUGARS WILL EVENTUALLY BE EXPORTED TRANSPORTERS 16 [Arabidopsis thaliana]
448	Bni02T002540	54	61	68	514	205	3.96	4.39	5.14	35.53	17.54	4.49667	26.535	2.561	1.24e-10	2.53e-09	Up	Full=Bidirectional sugar transporter SWEET17; Short=AtSWEET17; AltName: Full=Protein SUGARS WILL EVENTUALLY BE EXPORTED TRANSPORTERS 17 [Arabidopsis thaliana]
2728	Bni10T014476	67	35	4	0	0	4.92	2.52	0.3	0	0	2.58	0.001	-11.3332	0.000104765	0.000620366	Down	Full=Bidirectional sugar transporter SWEET5; Short=AtSWEET5; AltName: Full=Protein SUGARS WILL EVENTUALLY BE EXPORTED TRANSPORTERS 5; AltName: Full=Protein VEGETATIVE CELL EXPRESSED 1; Short=AtVEX1 [Arabidopsis thaliana]
923	Bni03T004991	394	387	289	1	0	28.91	27.85	21.83	0.07	0	26.1967	0.035	-9.5478	4.76e-11	1.05e-09	Down	Full=Bidirectional sugar transporter SWEET5; Short=OsSWEET5 [Oryza sativa Japonica Group]
1205	Bni04T006369	463	434	380	0	0	33.98	31.23	28.7	0	0	31.3033	0.001	-14.934	3.13e-14	1.11e-12	Down	Full=Bidirectional sugar transporter SWEET5; Short=OsSWEET5 [Oryza sativa Japonica Group]
906	Bni03T004881	89	55	29	9	6	6.53	3.96	2.19	0.62	0.51	4.22667	0.565	-2.9032	0.000108882	0.000641445	Down	Full=Bifunctional chitinase/lysozyme; Includes: RecName: Full=Chitinase; Includes: RecName: Full=Lysozyme [Parthenocissus quinquefolia]
3204	Bni12T017183	25	23	22	53	58	1.83	1.66	1.66	3.66	4.96	1.71667	4.31	1.3281	0.00509689	0.0176713	Up	Full=Bifunctional monodehydroascorbate reductase and carbonic anhydrase nectarin-3; AltName: Full=Nectarin-III; Contains: RecName: Full=Nectarin-2; Flags: Precursor [Nicotiana langsdorffii x Nicotiana sanderae]
1185	Bni04T006272	212	159	149	345	521	15.56	11.44	11.25	23.85	44.58	12.75	34.215	1.4241	0.000118067	0.000689676	Up	Full=Binding partner of ACD11 1 [Arabidopsis thaliana]
2427	Bni09T012984	1754	1249	688	358	167	128.72	89.88	51.96	24.75	14.29	90.1867	19.52	-2.208	4.36e-07	4.69e-06	Down	Full=Binding partner of ACD11 1 [Arabidopsis thaliana]
3243	Bni13T017392	3586	3378	2607	1611	845	263.17	243.08	196.88	111.36	72.3	234.377	91.83	-1.3518	1.83e-07	2.13e-06	Down	Full=Biotin carboxylase 1, chloroplastic; AltName: Full=Acetyl-CoA carboxylase subunit A 1; Short=ACC; Flags: Precursor [Populus trichocarpa]
8	Bni01T000102	37	33	25	0	0	2.72	2.37	1.89	0	0	2.32667	0.001	-11.184	4.07e-06	3.49e-05	Down	Full=Blue copper protein; Flags: Precursor [Pisum sativum]
282	Bni01T001513	600	466	267	282	125	44.03	33.53	20.16	19.49	10.7	32.5733	15.095	-1.1096	0.0114003	0.0342467	Down	Full=Blue copper protein; Flags: Precursor [Pisum sativum]
414	Bni02T002364	72	55	27	125	187	5.28	3.96	2.04	8.64	16	3.76	12.32	1.7122	0.00176562	0.00711563	Up	Full=Blue copper protein; Short=PhBcp; Flags: Precursor [Petunia x hybrida]
2345	Bni08T012397	31	43	56	94	196	2.28	3.09	4.23	6.5	16.77	3.2	11.635	1.8623	0.00080419	0.00364205	Up	Full=BON1-associated protein 2; AltName: Full=Protein BON1-ASSOCIATED PROTEIN 1-LIKE [Arabidopsis thaliana]
235	Bni01T001341	213	222	116	321	423	15.63	15.98	8.76	22.19	36.19	13.4567	29.19	1.1172	0.00487592	0.0170008	Up	Full=Branched-chain-amino-acid aminotransferase 2, chloroplastic; Short=Atbcat-2; Flags: Precursor [Arabidopsis thaliana]
1572	Bni05T008160	1854	1507	954	715	526	136.06	108.44	72.05	49.42	45.01	105.517	47.215	-1.1602	0.000207602	0.00112729	Down	Full=BRAP2 RING ZnF UBP domain-containing protein 2 [Arabidopsis thaliana]
2456	Bni09T013092	991	928	680	2353	2581	72.73	66.78	51.35	162.65	220.84	63.62	191.745	1.5916	2.78e-10	5.39e-09	Up	Full=BRASSINOSTEROID INSENSITIVE 1-associated receptor kinase 1; Short=AtBAK1; Short=BRI1-associated receptor kinase 1; AltName: Full=Protein ELONGATED; AltName: Full=Somatic embryogenesis receptor kinase 3; Short=AtSERK3; AltName: Full=Somatic embryogenesis receptor-like kinase 3; Flags: Precursor [Arabidopsis thaliana]
2167	Bni08T011407	252	221	261	635	346	18.49	15.9	19.71	43.89	29.6	18.0333	36.745	1.0269	9.6e-05	0.000574068	Up	Full=Brassinosteroid LRR receptor kinase BRL1; AltName: Full=BRI1-like receptor kinase 1; Flags: Precursor [Oryza sativa Japonica Group]
1505	Bni05T007837	584	751	825	316	128	42.86	54.04	62.3	21.84	10.95	53.0667	16.395	-1.6946	1.39e-06	1.32e-05	Down	Full=BRCA1-associated RING domain protein 1; Short=AtBARD1; AltName: Full=Protein REPRESSOR OF WUSCHEL 1 [Arabidopsis thaliana]
360	Bni01T001883	1497	1226	1015	554	287	109.86	88.22	76.65	38.29	24.56	91.5767	31.425	-1.5431	7.87e-08	9.79e-07	Down	Full=Bromodomain and WD repeat-containing protein 1; AltName: Full=WD repeat-containing protein 9 [Mus musculus]
1588	Bni05T008278	1008	990	1029	1686	3026	73.97	71.24	77.71	116.54	258.91	74.3067	187.725	1.3371	0.000112227	0.000659127	Up	Full=BTB/POZ and TAZ domain-containing protein 3; AltName: Full=BTB and TAZ domain protein 3 [Arabidopsis thaliana]
3502	Bni14T018745	24	9	13	48	41	1.76	0.65	0.98	3.32	3.51	1.13	3.415	1.5956	0.0155714	0.0442449	Up	Full=BTB/POZ and TAZ domain-containing protein 4; AltName: Full=BTB and TAZ domain protein 4 [Arabidopsis thaliana]
1776	Bni06T009325	127	186	201	370	502	9.32	13.38	15.18	25.58	42.95	12.6267	34.265	1.4403	4.86e-05	0.000315423	Up	Full=BTB/POZ domain-containing protein At1g03010 [Arabidopsis thaliana]
2826	Bni10T014924	1695	1181	811	321	368	124.39	84.98	61.25	22.19	31.49	90.2067	26.84	-1.7488	1.73e-06	1.62e-05	Down	Full=BTB/POZ domain-containing protein At1g04390 [Arabidopsis thaliana]
2827	Bni10T014925	619	449	198	0	1	45.43	32.31	14.95	0	0.09	30.8967	0.045	-9.4233	1.15e-10	2.36e-09	Down	Full=BTB/POZ domain-containing protein At1g04390 [Arabidopsis thaliana]
2828	Bni10T014926	1126	744	410	7	4	82.63	53.54	30.96	0.48	0.34	55.71	0.41	-7.0862	2.68e-29	3.96e-27	Down	Full=BTB/POZ domain-containing protein At1g04390 [Arabidopsis thaliana]
3445	Bni13T018336	178	159	125	354	1023	13.06	11.44	9.44	24.47	87.53	11.3133	56	2.3074	1.09e-05	8.41e-05	Up	Full=BTB/POZ domain-containing protein At1g55760 [Arabidopsis thaliana]
2579	Bni09T013716	133	157	207	490	504	9.76	11.3	15.63	33.87	43.12	12.23	38.495	1.6542	1.81e-08	2.59e-07	Up	Full=BTB/POZ domain-containing protein At1g67900 [Arabidopsis thaliana]
1004	Bni04T005435	16	16	13	1	0	1.17	1.15	0.98	0.07	0	1.1	0.035	-4.974	0.00334242	0.0123012	Down	Full=BTB/POZ domain-containing protein At2g04740 [Arabidopsis thaliana]
2005	Bni07T010559	1075	862	623	423	259	78.89	62.03	47.05	29.24	22.16	62.6567	25.7	-1.2857	2.25e-05	0.000159873	Down	Full=BTB/POZ domain-containing protein At3g05675 [Arabidopsis thaliana]
2088	Bni07T010983	81	106	105	337	301	5.94	7.63	7.93	23.29	25.75	7.16667	24.52	1.7746	5.5e-12	1.42e-10	Up	Full=BTB/POZ domain-containing protein At3g08570 [Arabidopsis thaliana]
2459	Bni09T013106	98	97	85	198	180	7.19	6.98	6.42	13.69	15.4	6.86333	14.545	1.0835	4.1e-05	0.000271417	Up	Full=BTB/POZ domain-containing protein At3g19850 [Arabidopsis thaliana]
3499	Bni14T018739	409	488	595	1617	779	30.02	35.12	44.93	111.77	66.65	36.69	89.21	1.2818	2.1e-05	0.000150631	Up	Full=BTB/POZ domain-containing protein At3g49900 [Arabidopsis thaliana]
817	Bni03T004514	339	316	243	29	15	24.88	22.74	18.35	2	1.28	21.99	1.64	-3.7451	2.65e-24	2.65e-22	Down	Full=BTB/POZ domain-containing protein At3g56230 [Arabidopsis thaliana]
3220	Bni12T017243	8	9	4	0	0	0.59	0.65	0.3	0	0	0.513333	0.001	-9.0038	0.0115703	0.0346608	Down	Full=BTB/POZ domain-containing protein At5g03250 [Arabidopsis thaliana]
992	Bni04T005401	9	11	3	0	0	0.66	0.79	0.23	0	0	0.56	0.001	-9.1293	0.0108301	0.0328419	Down	Full=BTB/POZ domain-containing protein At5g48130 [Arabidopsis thaliana]
1705	Bni06T008941	104	138	154	387	768	7.63	9.93	11.63	26.75	65.71	9.73	46.23	2.2483	2.84e-07	3.16e-06	Up	Full=BTB/POZ domain-containing protein At5g48800 [Arabidopsis thaliana]
3536	Bni14T018908	328	361	404	930	532	24.07	25.98	30.51	64.29	45.52	26.8533	54.905	1.0318	1.37e-05	0.000103712	Up	Full=BTB/POZ domain-containing protein At5g66560 [Arabidopsis thaliana]
3507	Bni14T018758	134	129	106	501	1685	9.83	9.28	8.01	34.63	144.17	9.04	89.4	3.3059	1.62e-09	2.8e-08	Up	Full=BTB/POZ domain-containing protein SR1IP1; AltName: Full=Protein ATSR1-INTERACTION PROTEIN 1 [Arabidopsis thaliana]
83	Bni01T000599	3454	3122	2262	4916	7648	253.48	224.66	170.83	339.81	654.38	216.323	497.095	1.2003	0.000325201	0.00166189	Up	Full=BURP domain protein RD22; AltName: Full=Dehydration-responsive protein RD22; Flags: Precursor [Arabidopsis thaliana]
1846	Bni06T009632	11	7	2	96	69	0.81	0.5	0.15	6.64	5.9	0.486667	6.27	3.6875	1.93e-07	2.24e-06	Up	Full=BURP domain-containing protein 17; Short=OsBURP17; Flags: Precursor [Oryza sativa Japonica Group]
433	Bni02T002443	370	259	128	633	1424	27.15	18.64	9.67	43.76	121.84	18.4867	82.8	2.1631	8.93e-05	0.00053881	Up	Full=BURP domain-containing protein 6; Short=OsBURP06; Flags: Precursor [Oryza sativa Japonica Group]
1049	Bni04T005668	49	35	45	120	84	3.6	2.52	3.4	8.29	7.19	3.17333	7.74	1.2863	0.000633799	0.00296202	Up	Full=Butyrate--CoA ligase AAE11, peroxisomal; AltName: Full=Acyl-activating enzyme 11; AltName: Full=Butyryl-CoA synthetase [Arabidopsis thaliana]
311	Bni01T001677	74	42	44	162	256	5.43	3.02	3.32	11.2	21.9	3.92333	16.55	2.0767	1.58e-05	0.000116795	Up	Full=bZIP transcription factor 2; Short=AtbZIP2; AltName: Full=G-box-binding factor 5; AltName: Full=Protein FLORAL TRANSITION AT THE MERISTEM 3 [Arabidopsis thaliana]
1901	Bni06T009936	533	446	322	234	173	39.12	32.09	24.32	16.17	14.8	31.8433	15.485	-1.0401	0.000415461	0.0020486	Down	Full=bZIP transcription factor ABI5 homolog; Short=OsABI5; AltName: Full=bZIP transcription factor 10; Short=OsBZIP10 [Oryza sativa Japonica Group]
594	Bni02T003258	542	637	594	210	295	39.78	45.84	44.86	14.52	25.24	43.4933	19.88	-1.1295	0.000184052	0.0010183	Down	Full=bZIP transcription factor RISBZ3; AltName: Full=Rice seed bZIP3; AltName: Full=bZIP transcription factor 20; Short=OsbZIP20 [Oryza sativa Japonica Group]
3138	Bni12T016838	1148	1366	1450	29	15	84.25	98.3	109.5	2	1.28	97.35	1.64	-5.8914	1.5e-84	2.59e-81	Down	Full=bZIP transcription factor TGA10; AltName: Full=Protein TGACG (TGA) motif-binding protein 10 [Nicotiana tabacum]
1464	Bni05T007619	1854	1403	1017	718	604	136.06	100.96	76.8	49.63	51.68	104.607	50.655	-1.0462	0.000366416	0.00183772	Down	Full=C2 and GRAM domain-containing protein At1g03370 [Arabidopsis thaliana]
2708	Bni10T014395	70	53	21	1	0	5.14	3.81	1.59	0.07	0	3.51333	0.035	-6.6493	4.55e-05	0.000297111	Down	Full=C2 and GRAM domain-containing protein At5g50170 [Arabidopsis thaliana]
3258	Bni13T017510	2163	1961	1358	818	609	158.74	141.11	102.56	56.54	52.11	134.137	54.325	-1.304	1.94e-07	2.24e-06	Down	Full=Cadmium/zinc-transporting ATPase HMA2; AltName: Full=Cadmium/zinc-transporting ATPase 3; AltName: Full=Protein HEAVY METAL ATPASE 2 [Arabidopsis thaliana]
2231	Bni08T011792	17	14	13	1	2947	1.25	1.01	0.98	0.07	252.15	1.08	126.11	6.8675	0.00246984	0.00947191	Up	Full=Caffeic acid 3-O-methyltransferase; Short=CAOMT; Short=COMT; AltName: Full=S-adenosysl-L-methionine:caffeic acid 3-O-methyltransferase [Medicago sativa]
929	Bni03T005033	365	354	297	743	772	26.79	25.47	22.43	51.36	66.05	24.8967	58.705	1.2375	2.4e-08	3.35e-07	Up	Full=Caffeic acid 3-O-methyltransferase; Short=CAOMT; Short=COMT; AltName: Full=S-adenosysl-L-methionine:caffeic acid 3-O-methyltransferase [Prunus dulcis]
1816	Bni06T009511	3830	3927	3366	412	196	281.07	282.59	254.2	28.48	16.77	272.62	22.625	-3.5909	6.78e-45	2.25e-42	Down	Full=Caffeoyl-CoA O-methyltransferase; AltName: Full=Trans-caffeoyl-CoA 3-O-methyltransferase; Short=CCOAMT; Short=CCOAOMT [Vitis vinifera]
693	Bni03T003890	235	233	193	468	827	17.25	16.77	14.58	32.35	70.76	16.2	51.555	1.6701	1.02e-05	7.93e-05	Up	Full=Caffeoylshikimate esterase; AltName: Full=Lysophospholipase 2; Short=LysoPL2 [Arabidopsis thaliana]
914	Bni03T004942	32	26	36	111	403	2.35	1.87	2.72	7.67	34.48	2.31333	21.075	3.1875	1.08e-06	1.05e-05	Up	Full=Calcineurin B-like protein 4; AltName: Full=Protein SALT OVERLY SENSITIVE 3 [Arabidopsis thaliana]
477	Bni02T002674	83	110	18	404	218	6.09	7.92	1.36	27.93	18.65	5.12333	23.29	2.1846	0.00119783	0.00512004	Up	Full=Calcium uniporter protein 6, mitochondrial; Flags: Precursor [Arabidopsis thaliana]
3322	Bni13T017827	51	40	4	0	0	3.74	2.88	0.3	0	0	2.30667	0.001	-11.1716	0.000127273	0.000736727	Down	Full=Calcium uptake protein, mitochondrial; AltName: Full=Mitochondrial calcium uniporter; Flags: Precursor [Arabidopsis thaliana]
2483	Bni09T013237	1001	757	355	0	0	73.46	54.47	26.81	0	0	51.58	0.001	-15.6545	7.23e-15	2.81e-13	Down	Full=Calcium/calmodulin-dependent protein kinase cmkB; Short=CaMK B; AltName: Full=CaMKI/IV homolog [Aspergillus nidulans]
3388	Bni13T018079	2334	1864	1124	423	481	171.29	134.13	84.88	29.24	41.16	130.1	35.2	-1.886	1.11e-07	1.34e-06	Down	Full=Calcium/calmodulin-regulated receptor-like kinase 1; Short=AtCRLK1 [Arabidopsis thaliana]
3021	Bni11T016155	65	68	60	424	164	4.77	4.89	4.53	29.31	14.03	4.73	21.67	2.1958	5.96e-08	7.67e-07	Up	Full=Calcium-binding protein CP1; AltName: Full=NaCl-inducible Ca2+-binding protein; Short=AtCP1 [Arabidopsis thaliana]
2222	Bni08T011752	228	315	323	1181	459	16.73	22.67	24.39	81.64	39.27	21.2633	60.455	1.5075	3.71e-05	0.00024788	Up	Full=Calcium-binding protein KIC; AltName: Full=KCBP-interacting calcium-binding protein [Arabidopsis thaliana]
644	Bni02T003604	914	849	865	18	43	67.08	61.09	65.33	1.24	3.68	64.5	2.46	-4.7126	2.71e-31	4.6e-29	Down	Full=Calcium-dependent protein kinase 24; Short=OsCDPK24; Short=OsCPK24; AltName: Full=Calcium-dependent protein kinase OsCDPK14 [Oryza sativa Japonica Group]
3415	Bni13T018211	121	114	67	23	12	8.88	8.2	5.06	1.59	1.03	7.38	1.31	-2.4941	1.22e-06	1.18e-05	Down	Full=Calcium-dependent protein kinase 27; Short=OsCDPK27; Short=OsCPK27 [Oryza sativa Japonica Group]
620	Bni02T003456	4283	3499	2579	2017	1298	314.32	251.79	194.77	139.42	111.06	253.627	125.24	-1.018	0.000132052	0.000760057	Down	Full=Calcium-dependent protein kinase 7; AltName: Full=Calmodulin-domain protein kinase CDPK isoform 7 [Arabidopsis thaliana]
1515	Bni05T007889	413	519	524	249	161	30.31	37.35	39.57	17.21	13.78	35.7433	15.495	-1.2059	2.8e-07	3.12e-06	Down	Full=Calcyclin-binding protein; Short=CacyBP; AltName: Full=Siah-interacting protein [Mus musculus]
3248	Bni13T017441	2972	2766	2372	4378	6413	218.11	199.04	179.13	302.62	548.71	198.76	425.665	1.0987	0.000158357	0.00088924	Up	Full=Callose synthase 2; AltName: Full=1,3-beta-glucan synthase; AltName: Full=Protein GLUCAN SYNTHASE-LIKE 3 [Arabidopsis thaliana]
756	Bni03T004235	4731	3521	2212	64	36	347.2	253.37	167.05	4.42	3.08	255.873	3.75	-6.0924	4.4e-58	2.72e-55	Down	Full=Callose synthase 5; AltName: Full=1,3-beta-glucan synthase; AltName: Full=Protein GLUCAN SYNTHASE-LIKE 2; AltName: Full=Protein LESS ADHERENT POLLEN 1 [Arabidopsis thaliana]
2964	Bni11T015796	48	29	20	143	69	3.52	2.09	1.51	9.88	5.9	2.37333	7.89	1.7331	0.00167194	0.00679677	Up	Full=Calmodulin; Short=CaM [Pfiesteria piscicida] >A3E4D8.1 RecName: Full=Calmodulin; Short=CaM [Prorocentrum minimum] >A3E4F9.1 RecName: Full=Calmodulin; Short=CaM [Karlodinium veneficum] >A4UHC0.1 RecName: Full=Calmodulin; Short=CaM [Alexandrium fundyense]
1684	Bni06T008839	45	28	13	4	6	3.3	2.01	0.98	0.28	0.51	2.09667	0.395	-2.4082	0.00847692	0.0268812	Down	Full=Calmodulin-like protein 3 [Arabidopsis thaliana]
176	Bni01T001015	1920	1387	773	132	96	140.9	99.81	58.38	9.12	8.21	99.6967	8.665	-3.5243	1.01e-18	6.24e-17	Down	Full=Carbon catabolite repressor protein 4 homolog 1; Short=CCR4 homolog 1 [Arabidopsis thaliana]
2559	Bni09T013647	201	149	126	489	484	14.75	10.72	9.52	33.8	41.41	11.6633	37.605	1.6889	1.32e-08	1.92e-07	Up	Full=Carbonic anhydrase 2; AltName: Full=Carbonate dehydratase 2 [Flaveria linearis]
1011	Bni04T005468	145	155	97	36	38	10.64	11.15	7.33	2.49	3.25	9.70667	2.87	-1.7579	1.18e-05	9.02e-05	Down	Full=CASP-like protein 1C3; Short=PtCASPL1C3 [Populus trichocarpa]
3001	Bni11T015991	95	63	62	150	284	6.97	4.53	4.68	10.37	24.3	5.39333	17.335	1.6844	0.000542932	0.00258746	Up	Full=CASP-like protein 1D1; Short=VvCASPL1D1 [Vitis vinifera]
3000	Bni11T015990	370	396	405	2631	1204	27.15	28.5	30.59	181.86	103.02	28.7467	142.44	2.3089	1.51e-16	7.33e-15	Up	Full=CASP-like protein 1E1; Short=PtCASPL1E1 [Populus trichocarpa]
1258	Bni04T006588	106	140	125	488	179	7.78	10.07	9.44	33.73	15.32	9.09667	24.525	1.4308	0.000389687	0.00193979	Up	Full=CASP-like protein 1F2; Short=RcCASPL1F2 [Ricinus communis]
1990	Bni07T010481	949	1133	1053	3108	1440	69.64	81.53	79.52	214.84	123.21	76.8967	169.025	1.1362	2.6e-05	0.000181082	Up	Full=CASP-like protein 2A1; Short=VvCASPL2A1 [Vitis vinifera]
1475	Bni05T007655	305	378	366	1503	1370	22.38	27.2	27.64	103.89	117.22	25.74	110.555	2.1027	1.86e-30	3.07e-28	Up	Full=CASP-like protein 2B2; Short=PtCASPL2B2 [Populus trichocarpa]
3270	Bni13T017588	25	23	22	479	176	1.83	1.66	1.66	33.11	15.06	1.71667	24.085	3.8105	1.22e-16	6.03e-15	Up	Full=CASP-like protein 2C1; Short=VvCASPL2C1 [Vitis vinifera]
3614	BniUnT019330	196	133	126	537	227	14.38	9.57	9.52	37.12	19.42	11.1567	28.27	1.3414	0.000668255	0.00309231	Up	Full=CASP-like protein 2C1; Short=VvCASPL2C1 [Vitis vinifera]
1412	Bni05T007358	1606	1511	961	451	215	117.86	108.73	72.57	31.17	18.4	99.72	24.785	-2.0084	2.13e-09	3.59e-08	Down	Full=CASP-like protein 3A1; Short=RcCASPL3A1 [Ricinus communis]
1207	Bni04T006376	67	73	98	123	176	4.92	5.25	7.4	8.5	15.06	5.85667	11.78	1.0082	0.0144692	0.0417031	Up	Full=CASP-like protein 4A2; Short=AtCASPL4A2 [Arabidopsis thaliana]
357	Bni01T001877	46071	45676	38434	79263	90474	3381.03	3286.85	2902.55	5478.97	7741.21	3190.14	6610.09	1.051	6.36e-07	6.6e-06	Up	Full=Catalase isozyme 1 [Gossypium hirsutum]
3044	Bni12T016293	172	228	264	105	87	12.62	16.41	19.94	7.26	7.44	16.3233	7.35	-1.1511	0.000232362	0.00124299	Down	Full=Cation/calcium exchanger 1; Short=AtCCX1; AltName: Full=Protein CATION EXCHANGER 7 [Arabidopsis thaliana]
3043	Bni12T016291	291	295	231	393	778	21.36	21.23	17.45	27.17	66.57	20.0133	46.87	1.2277	0.00278476	0.0105116	Up	Full=Cation/calcium exchanger 2; AltName: Full=Protein CATION EXCHANGER 8 [Arabidopsis thaliana]
2953	Bni11T015764	1710	955	18	4	1	125.49	68.72	1.36	0.28	0.09	65.19	0.185	-8.461	5.04e-06	4.21e-05	Down	Full=Cation/H(+) antiporter 15; AltName: Full=Protein CATION/H+ EXCHANGER 15; Short=AtCHX15 [Arabidopsis thaliana]
2051	Bni07T010728	73	42	19	0	0	5.36	3.02	1.43	0	0	3.27	0.001	-11.6751	2.9e-06	2.56e-05	Down	Full=Cation/H(+) antiporter 2; AltName: Full=Protein CATION/H+ EXCHANGER 2; Short=AtCHX2 [Arabidopsis thaliana]
1980	Bni07T010406	168	110	79	33	32	12.33	7.92	5.97	2.28	2.74	8.74	2.51	-1.7999	0.000215402	0.00116343	Down	Full=Cation/H(+) antiporter 20; AltName: Full=Protein CATION/H+ EXCHANGER 20; Short=AtCHX20 [Arabidopsis thaliana]
2848	Bni10T015049	61	59	18	7	0	4.48	4.25	1.36	0.48	0	3.36333	0.24	-3.8088	0.000837027	0.00376706	Down	Full=Cation/H(+) antiporter 28; AltName: Full=Protein CATION/H+ EXCHANGER 28; Short=AtCHX28 [Arabidopsis thaliana]
908	Bni03T004896	133	76	2	1	0	9.76	5.47	0.15	0.07	0	5.12667	0.035	-7.1945	0.000267628	0.00140338	Down	Full=Cation/H(+) antiporter 4; AltName: Full=Protein CATION/H+ EXCHANGER 4; Short=AtCHX4 [Arabidopsis thaliana]
2044	Bni07T010700	18	18	17	106	75	1.32	1.3	1.28	7.33	6.42	1.3	6.875	2.4028	2.56e-08	3.56e-07	Up	Full=Cationic amino acid transporter 6, chloroplastic; Flags: Precursor [Arabidopsis thaliana]
750	Bni03T004204	181	190	179	531	693	13.28	13.67	13.52	36.7	59.3	13.49	48	1.8311	1.68e-10	3.36e-09	Up	Full=Cationic amino acid transporter 7, chloroplastic; Flags: Precursor [Arabidopsis thaliana]
1894	Bni06T009905	24	18	15	11	228	1.76	1.3	1.13	0.76	19.51	1.39667	10.135	2.8593	0.00799221	0.0255837	Up	Full=Cationic peroxidase 2; AltName: Full=PNPC2; Flags: Precursor [Arachis hypogaea]
1580	Bni05T008192	135	132	169	411	477	9.91	9.5	12.76	28.41	40.81	10.7233	34.61	1.6904	6.09e-09	9.51e-08	Up	Full=CBL-interacting serine/threonine-protein kinase 25; AltName: Full=SNF1-related kinase 3.25; AltName: Full=SOS2-like protein kinase PKS25 [Arabidopsis thaliana]
3310	Bni13T017758	1948	2190	2081	5974	3757	142.96	157.59	157.16	412.95	321.46	152.57	367.205	1.2671	2.08e-14	7.57e-13	Up	Full=CBL-interacting serine/threonine-protein kinase 6; AltName: Full=SNF1-related kinase 3.14; AltName: Full=SOS2-like protein kinase PKS4; AltName: Full=SOS3-interacting protein 3 [Arabidopsis thaliana]
2815	Bni10T014880	2427	1908	1243	799	798	178.11	137.3	93.87	55.23	68.28	136.427	61.755	-1.1435	0.000366607	0.00183814	Down	Full=CBS domain-containing protein CBSCBSPB1 [Arabidopsis thaliana]
700	Bni03T003917	1536	1309	839	521	463	112.72	94.2	63.36	36.01	39.62	90.0933	37.815	-1.2525	3.08e-05	0.000210399	Down	Full=CDP-diacylglycerol--glycerol-3-phosphate 3-phosphatidyltransferase 1, chloroplastic; AltName: Full=Phosphatidylglycerophosphate synthase 1; Short=PGP synthase 1; Flags: Precursor [Arabidopsis thaliana]
2758	Bni10T014617	694	646	537	323	188	50.93	46.49	40.55	22.33	16.09	45.99	19.21	-1.2595	3.3e-07	3.62e-06	Down	Full=CDT1-like protein a, chloroplastic; Short=AtCDT1a; Flags: Precursor [Arabidopsis thaliana]
2445	Bni09T013049	2285	1638	830	0	0	167.69	117.87	62.68	0	0	116.08	0.001	-16.8248	7.7e-18	4.29e-16	Down	Full=Cell division control protein 2 homolog B [Antirrhinum majus]
2915	Bni11T015544	28	14	4	0	0	2.05	1.01	0.3	0	0	1.12	0.001	-10.1293	0.00130993	0.00551596	Down	Full=Cell division control protein 2 homolog; AltName: Full=p34cdc2 [Oxybasis rubra]
2908	Bni11T015500	1329	1468	1512	685	655	97.53	105.64	114.19	47.35	56.04	105.787	51.695	-1.0331	2.08e-09	3.52e-08	Down	Full=Cell division control protein 48 homolog C; Short=AtCDC48c; AltName: Full=Protein EMBRYO DEFECTIVE 1354 [Arabidopsis thaliana]
513	Bni02T002831	397	469	424	279	141	29.13	33.75	32.02	19.29	12.06	31.6333	15.675	-1.013	0.000251726	0.00132968	Down	Full=Cell division control protein 6 homolog B; Short=AtCDC6b [Arabidopsis thaliana]
832	Bni03T004587	307	206	121	0	5	22.53	14.82	9.14	0	0.43	15.4967	0.215	-6.1715	4.35e-13	1.32e-11	Down	Full=Cell division cycle 20.2, cofactor of APC complex; Short=AtCDC20.2 [Arabidopsis thaliana]
3163	Bni12T016961	1705	1417	1080	547	493	125.13	101.97	81.56	37.81	42.18	102.887	39.995	-1.3632	7.69e-08	9.6e-07	Down	Full=Cell division cycle 20.2, cofactor of APC complex; Short=AtCDC20.2 [Arabidopsis thaliana]
3215	Bni12T017218	6952	7162	7158	3100	2336	510.19	515.38	540.57	214.28	199.87	522.047	207.075	-1.334	6.1e-34	1.2e-31	Down	Full=Cell division cycle protein 48 homolog [Capsicum annuum]
137	Bni01T000898	4482	4491	4128	11051	11465	328.92	323.17	311.75	763.89	980.98	321.28	872.435	1.4412	6.24e-17	3.15e-15	Up	Full=Cellulose synthase A catalytic subunit 1 [UDP-forming]; Short=AtCesA1; AltName: Full=Protein RADIALLY SWOLLEN 1; Short=AtRSW1 [Arabidopsis thaliana]
140	Bni01T000903	3718	4053	3861	31	44	272.85	291.65	291.58	2.14	3.76	285.36	2.95	-6.5959	1.6e-158	2.77e-154	Down	Full=Cellulose synthase A catalytic subunit 1 [UDP-forming]; Short=AtCesA1; AltName: Full=Protein RADIALLY SWOLLEN 1; Short=AtRSW1 [Arabidopsis thaliana]
1720	Bni06T009024	1413	1407	1231	1728	4104	103.7	101.25	92.97	119.45	351.15	99.3067	235.3	1.2445	0.00321689	0.011906	Up	Full=Cellulose synthase A catalytic subunit 4 [UDP-forming]; Short=AtCesA4; AltName: Full=Protein IRREGULAR XYLEM 5; Short=AtIRX5 [Arabidopsis thaliana]
3303	Bni13T017713	804	851	892	1137	2603	59	61.24	67.36	78.59	222.72	62.5333	150.655	1.2686	0.00231247	0.00894786	Up	Full=Cellulose synthase A catalytic subunit 7 [UDP-forming]; Short=AtCesA7; AltName: Full=Protein FRAGILE FIBER 5; AltName: Full=Protein IRREGULAR XYLEM 3; Short=AtIRX3 [Arabidopsis thaliana]
1548	Bni05T008018	167	204	172	230	2482	12.26	14.68	12.99	15.9	212.37	13.31	114.135	3.1002	0.00675593	0.0222701	Up	Full=Cellulose synthase A catalytic subunit 8 [UDP-forming]; Short=AtCesA8; AltName: Full=Protein IRREGULAR XYLEM 1; Short=AtIRX1; AltName: Full=Protein LEAF WILTING 2 [Arabidopsis thaliana]
2920	Bni11T015561	65	41	7	3	1	4.77	2.95	0.53	0.21	0.09	2.75	0.15	-4.1964	0.000820809	0.00370662	Down	Full=Cellulose synthase-like protein D1; Short=AtCslD1 [Arabidopsis thaliana]
2075	Bni07T010863	978	972	624	140	186	71.77	69.95	47.12	9.68	15.91	62.9467	12.795	-2.2985	7.96e-12	2e-10	Down	Full=Cellulose synthase-like protein D3; Short=AtCslD3; AltName: Full=Protein KOJAK [Arabidopsis thaliana]
1677	Bni06T008803	106	70	2	0	0	7.78	5.04	0.15	0	0	4.32333	0.001	-12.0779	4.3e-05	0.000282744	Down	Full=Cellulose synthase-like protein D4; Short=AtCslD4 [Arabidopsis thaliana]
1466	Bni05T007627	38	39	25	11	0	2.79	2.81	1.89	0.76	0	2.49667	0.38	-2.7159	0.0147703	0.0423729	Down	Full=Cellulose synthase-like protein E6; AltName: Full=OsCslE6 [Oryza sativa Japonica Group]
3436	Bni13T018296	70	54	42	168	168	5.14	3.89	3.17	11.61	14.37	4.06667	12.99	1.6755	6.2e-06	5.07e-05	Up	Full=Cellulose synthase-like protein E6; AltName: Full=OsCslE6 [Oryza sativa Japonica Group]
2000	Bni07T010529	109	128	132	325	215	8	9.21	9.97	22.47	18.4	9.06	20.435	1.1735	2.88e-06	2.55e-05	Up	Full=Cellulose synthase-like protein G3; Short=AtCslG3 [Arabidopsis thaliana]
969	Bni04T005289	314	326	265	99	143	23.04	23.46	20.01	6.84	12.24	22.17	9.54	-1.2165	0.000335177	0.00170464	Down	Full=Cellulose synthase-like protein H1; AltName: Full=OsCslH1 [Oryza sativa Japonica Group]
2923	Bni11T015567	11737	12021	10931	34377	13681	861.35	865.03	825.51	2376.27	1170.59	850.63	1773.43	1.0599	0.000434055	0.00212392	Up	Full=Chalcone synthase 1; AltName: Full=Naringenin-chalcone synthase 1 [Camellia sinensis]
2645	Bni10T014101	2463	2232	1965	43	69	180.75	160.62	148.4	2.97	5.9	163.257	4.435	-5.2021	2.15e-63	1.69e-60	Down	Full=Chaperone protein ClpB1; AltName: Full=ATP-dependent Clp protease ATP-binding subunit ClpB homolog 1; AltName: Full=Casein lytic proteinase B1; AltName: Full=Heat shock protein 101; AltName: Full=Protein DEFECTIVE IN LONG-TERM ACQUIRED THERMOTOLERANCE [Arabidopsis thaliana]
2170	Bni08T011441	0	0	0	8	13	0	0	0	0.55	1.11	0.001	0.83	9.697	0.00631533	0.0210833	Up	Full=Chaperone protein DnaJ [Deinococcus proteolyticus MRP]
335	Bni01T001776	114	163	161	142	828	8.37	11.73	12.16	9.82	70.85	10.7533	40.335	1.9072	0.00625321	0.0209225	Up	Full=Chaperone protein DnaJ [Exiguobacterium sp. AT1b]
524	Bni02T002901	10	4	7	53	47	0.73	0.29	0.53	3.66	4.02	0.516667	3.84	2.8938	1.84e-05	0.00013403	Up	Full=Chaperone protein DnaJ [Lactobacillus reuteri DSM 20016] >B2G6W4.1 RecName: Full=Chaperone protein DnaJ [Lactobacillus reuteri JCM 1112]
440	Bni02T002488	154	130	68	40	48	11.3	9.35	5.14	2.76	4.11	8.59667	3.435	-1.3235	0.00876933	0.0276814	Down	Full=Chaperone protein DnaJ [Mycoplasma pulmonis UAB CTIP]
1218	Bni04T006413	40	47	37	38	242	2.94	3.38	2.79	2.63	20.71	3.03667	11.67	1.9422	0.0149278	0.0427268	Up	Full=Chaperone protein DnaJ [Staphylococcus carnosus subsp. carnosus TM300]
3575	Bni14T019084	57	56	9	5	6	4.18	4.03	0.68	0.35	0.51	2.96333	0.43	-2.7848	0.00538299	0.0185109	Down	Full=Chaperone protein dnaJ 11, chloroplastic; Short=AtDjC11; Short=AtJ11; Flags: Precursor [Arabidopsis thaliana]
2392	Bni08T012651	80	95	76	31	25	5.87	6.84	5.74	2.14	2.14	6.15	2.14	-1.523	9.7e-05	0.000579361	Down	Full=Chaperone protein dnaJ A6, chloroplastic; Short=atDjA6; AltName: Full=Chaperone protein dnaJ A26; Short=AtDjA26; Flags: Precursor [Arabidopsis thaliana]
3629	BniUnT019441	2749	3302	3749	1882	1102	201.74	237.61	283.13	130.09	94.29	240.827	112.19	-1.1021	1.92e-06	1.77e-05	Down	Full=Chaperonin CPN60-2, mitochondrial; AltName: Full=HSP60-2; Flags: Precursor [Cucurbita maxima]
1434	Bni05T007456	839	935	1123	481	299	61.57	67.28	84.81	33.25	25.58	71.22	29.415	-1.2757	5.32e-08	6.93e-07	Down	Full=Chaperonin CPN60-like 2, mitochondrial; AltName: Full=HSP60-like 2; Flags: Precursor [Arabidopsis thaliana]
1596	Bni06T008320	99	68	9	2	2	7.27	4.89	0.68	0.14	0.17	4.28	0.155	-4.7873	8.22e-05	0.000503221	Down	Full=Chitinase 10; AltName: Full=Pathogenesis related (PR)-3 chitinase 10; Flags: Precursor [Oryza sativa Japonica Group]
2390	Bni08T012631	171	171	107	229	928	12.55	12.31	8.08	15.83	79.4	10.98	47.615	2.1165	0.0006686	0.00309286	Up	Full=Chloride channel protein CLC-c; Short=AtCLC-c; AltName: Full=CBS domain-containing protein CBSCLC4 [Arabidopsis thaliana]
710	Bni03T003976	1232	1491	1568	3416	3257	90.41	107.29	118.42	236.13	278.68	105.373	257.405	1.2885	3.44e-12	9.13e-11	Up	Full=Chlorophyll a-b binding protein 1B-21, chloroplastic; AltName: Full=LHCI type I CAB-1B-21; AltName: Full=LHCI-730 chlorophyll a/b binding protein; AltName: Full=Light-harvesting complex I 21 kDa protein; Flags: Precursor [Hordeum vulgare]
1522	Bni05T007926	889	1239	1399	3684	2144	65.24	89.16	105.65	254.65	183.45	86.6833	219.05	1.3374	4.59e-07	4.91e-06	Up	Full=Chlorophyll a-b binding protein 3, chloroplastic; AltName: Full=LHCII type I CAB-3; Short=LHCP; Flags: Precursor [Glycine max]
1523	Bni05T007927	1426	1944	2187	6189	3689	104.65	139.89	165.16	427.81	315.64	136.567	371.725	1.4446	8.85e-09	1.34e-07	Up	Full=Chlorophyll a-b binding protein 3, chloroplastic; AltName: Full=LHCII type I CAB-3; Short=LHCP; Flags: Precursor [Glycine max]
2655	Bni10T014172	837	1061	1063	2868	2407	61.43	76.35	80.28	198.25	205.95	72.6867	202.1	1.4753	1.55e-17	8.19e-16	Up	Full=Chlorophyll a-b binding protein 4, chloroplastic; AltName: Full=LHCI type III CAB-4; Flags: Precursor [Arabidopsis thaliana]
1107	Bni04T005932	602	645	739	1865	1129	44.18	46.41	55.81	128.92	96.6	48.8	112.76	1.2083	8.63e-09	1.31e-07	Up	Full=Chlorophyll a-b binding protein 8, chloroplastic; AltName: Full=LHCI type III CAB-8; Flags: Precursor [Solanum lycopersicum]
1896	Bni06T009910	315	425	434	1734	944	23.12	30.58	32.78	119.86	80.77	28.8267	100.315	1.7991	9.77e-12	2.43e-10	Up	Full=Chlorophyll a-b binding protein CP24, chloroplastic; Flags: Precursor [Spinacia oleracea]
1957	Bni07T010261	1988	2344	2576	5510	4098	145.89	168.67	194.54	380.87	350.64	169.7	365.755	1.1079	7.47e-11	1.6e-09	Up	Full=Chlorophyll a-b binding protein CP29.2, chloroplastic; AltName: Full=LHCB4.2; AltName: Full=LHCII protein 4.2; Flags: Precursor [Arabidopsis thaliana]
2969	Bni11T015817	241	245	246	716	788	17.69	17.63	18.58	49.49	67.42	17.9667	58.455	1.702	6.09e-14	2.08e-12	Up	Full=Chlorophyllase-2; Short=AtCLH2; AltName: Full=Chlorophyll-chlorophyllido hydrolase 2; Short=Chlase 2 [Arabidopsis thaliana]
1397	Bni05T007286	317	303	183	91	112	23.26	21.8	13.82	6.29	9.58	19.6267	7.935	-1.3065	0.000649591	0.00302192	Down	Full=Choline-phosphate cytidylyltransferase 1; Short=AtCCT1; AltName: Full=CTP:phosphocholine cytidylyltransferase 1; AltName: Full=Phosphorylcholine transferase 1 [Arabidopsis thaliana]
2879	Bni11T015331	446	469	462	269	112	32.73	33.75	34.89	18.59	9.58	33.79	14.085	-1.2624	0.00011176	0.000656612	Down	Full=Chromatin assembly factor 1 subunit FAS2; Short=CAF-1 subunit FAS2; AltName: Full=CAF-1 p60 homolog; AltName: Full=Protein FASCIATA 2 [Arabidopsis thaliana]
248	Bni01T001390	266	185	125	5	3	19.52	13.31	9.44	0.35	0.26	14.09	0.305	-5.5297	3.83e-16	1.76e-14	Down	Full=Chromodomain-helicase-DNA-binding protein Mi-2 homolog; AltName: Full=ATP-dependent helicase Mi-2; Short=dMi-2 [Drosophila melanogaster]
1357	Bni05T007091	93	81	4	1	1	6.83	5.83	0.3	0.07	0.09	4.32	0.08	-5.7549	0.000157794	0.000886652	Down	Full=Clathrin coat assembly protein AP180; Short=At-AP180; AltName: Full=Clathrin coat-associated protein AP180 [Arabidopsis thaliana]
2512	Bni09T013405	21	13	2	0	0	1.54	0.94	0.15	0	0	0.876667	0.001	-9.7759	0.004599	0.0161756	Down	Full=CLAVATA3/ESR (CLE)-related protein 13; Contains: RecName: Full=CLE13p; Flags: Precursor [Arabidopsis thaliana]
2425	Bni09T012957	510	477	475	163	136	37.43	34.32	35.87	11.27	11.64	35.8733	11.455	-1.6469	1.41e-17	7.57e-16	Down	Full=Cleavage and polyadenylation specificity factor subunit 3-II; AltName: Full=Cleavage and polyadenylation specificity factor 73 kDa subunit II; Short=AtCPSF73-II; Short=CPSF 73 kDa subunit II; AltName: Full=Protein EMBRYO SAC DEVELOPMENT ARREST 26 [Arabidopsis thaliana]
347	Bni01T001804	9419	8163	5586	3913	2862	691.24	587.41	421.86	270.48	244.88	566.837	257.68	-1.1374	9.68e-06	7.57e-05	Down	Full=CO(2)-response secreted protease; AltName: Full=Subtilisin-like serine protease; Short=AtSBT5.2; AltName: Full=Tripeptidyl-peptidase II; Flags: Precursor [Arabidopsis thaliana]
770	Bni03T004292	181	194	198	364	394	13.28	13.96	14.95	25.16	33.71	14.0633	29.435	1.0656	1.16e-05	8.85e-05	Up	Full=CO(2)-response secreted protease; AltName: Full=Subtilisin-like serine protease; Short=AtSBT5.2; AltName: Full=Tripeptidyl-peptidase II; Flags: Precursor [Arabidopsis thaliana]
2316	Bni08T012193	2015	2095	2012	733	752	147.88	150.76	151.95	50.67	64.34	150.197	57.505	-1.3851	3.12e-15	1.27e-13	Down	Full=Coatomer subunit beta'-1; AltName: Full=Beta'-coat protein 1; Short=Beta'-COP 1 [Arabidopsis thaliana]
3394	Bni13T018107	280	182	7	0	2	20.55	13.1	0.53	0	0.17	11.3933	0.085	-7.0665	0.000639357	0.00298234	Down	Full=COBRA-like protein 10; Flags: Precursor [Arabidopsis thaliana]
1163	Bni04T006162	587	556	473	851	1362	43.08	40.01	35.72	58.82	116.54	39.6033	87.68	1.1466	0.00054682	0.00260199	Up	Full=COBRA-like protein 3; AltName: Full=Protein BRITTLE CULM1-like 4; Flags: Precursor [Oryza sativa Japonica Group]
2636	Bni10T014049	27	59	53	686	255	1.98	4.25	4	47.42	21.82	3.41	34.62	3.3438	5.05e-12	1.32e-10	Up	Full=COBRA-like protein 3; AltName: Full=Protein BRITTLE CULM1-like 4; Flags: Precursor [Oryza sativa Japonica Group]
2635	Bni10T014047	65	83	77	163	1204	4.77	5.97	5.82	11.27	103.02	5.52	57.145	3.3719	5.87e-06	4.83e-05	Up	Full=COBRA-like protein 4; Flags: Precursor [Arabidopsis thaliana]
3325	Bni13T017841	196	128	94	149	649	14.38	9.21	7.1	10.3	55.53	10.23	32.915	1.6859	0.0123787	0.0366125	Up	Full=Codeine O-demethylase [Papaver somniferum]
3537	Bni14T018909	90	58	41	8	3	6.6	4.17	3.1	0.55	0.26	4.62333	0.405	-3.5129	1.91e-06	1.77e-05	Down	Full=Cold-regulated 413 plasma membrane protein 2; Short=AtCOR413-PM2 [Arabidopsis thaliana]
273	Bni01T001482	421	367	289	758	763	30.9	26.41	21.83	52.4	65.28	26.38	58.84	1.1574	3.92e-06	3.38e-05	Up	Full=Cold-regulated protein 27 [Arabidopsis thaliana]
1366	Bni05T007139	524	474	387	471	1523	38.45	34.11	29.23	32.56	130.31	33.93	81.435	1.2631	0.0162767	0.0458641	Up	Full=Cold-responsive protein kinase 1 [Arabidopsis thaliana]
3412	Bni13T018195	459	560	567	12	36	33.68	40.3	42.82	0.83	3.08	38.9333	1.955	-4.3158	4.08e-19	2.65e-17	Down	Full=Condensin complex subunit 2; AltName: Full=Chromosome-associated protein H; Short=AtCAP-H; AltName: Full=Non-SMC condensin I complex subunit H; AltName: Full=Protein EMBRYO DEFECTIVE 2795 [Arabidopsis thaliana]
1041	Bni04T005636	781	1059	1271	671	261	57.32	76.21	95.99	46.38	22.33	76.5067	34.355	-1.1551	0.00217653	0.00851316	Down	Full=Condensin complex subunit 3; AltName: Full=Chromosome assembly protein xCAP-G; AltName: Full=Chromosome-associated protein G; AltName: Full=Condensin subunit CAP-G; AltName: Full=Non-SMC condensin I complex subunit G [Xenopus laevis]
2109	Bni07T011061	60	67	53	33	19	4.4	4.82	4	2.28	1.63	4.40667	1.955	-1.1725	0.0093501	0.0291208	Down	Full=COP1-interactive protein 1 [Arabidopsis thaliana]
518	Bni02T002874	369	440	351	939	575	27.08	31.66	26.51	64.91	49.2	28.4167	57.055	1.0056	3.25e-06	2.85e-05	Up	Full=Copper transporter 3; Short=OsCOPT3 [Oryza sativa Japonica Group]
1971	Bni07T010365	0	0	0	3	20	0	0	0	0.21	1.71	0.001	0.96	9.9069	0.00885955	0.0279139	Up	Full=Copper transporter 3; Short=OsCOPT3 [Oryza sativa Japonica Group]
1874	Bni06T009823	104	99	82	253	130	7.63	7.12	6.19	17.49	11.12	6.98	14.305	1.0352	0.00203363	0.00802533	Up	Full=Costars family protein WS02710_H03 [Picea sitchensis]
150	Bni01T000932	932	767	837	2687	941	68.4	55.19	63.21	185.74	80.51	62.2667	133.125	1.0962	0.00237089	0.00914117	Up	Full=CRAL-TRIO domain-containing protein YKL091C [Saccharomyces cerevisiae S288C]
2939	Bni11T015687	330	179	14	0	3	24.22	12.88	1.06	0	0.26	12.72	0.13	-6.6124	0.000564399	0.00267459	Down	Full=CRIB domain-containing protein RIC1; AltName: Full=ROP-interactive CRIB motif-containing protein 1; AltName: Full=Target of ROP protein RIC1 [Arabidopsis thaliana]
1491	Bni05T007715	63	93	69	6	8	4.62	6.69	5.21	0.41	0.68	5.50667	0.545	-3.3369	1e-08	1.49e-07	Down	Full=Crooked neck-like protein 1; AltName: Full=Crooked neck homolog; Short=hCrn [Homo sapiens]
2839	Bni10T014997	406	318	337	115	58	29.8	22.88	25.45	7.95	4.96	26.0433	6.455	-2.0124	1.25e-10	2.55e-09	Down	Full=Crossover junction endonuclease MUS81; AltName: Full=Protein MMS AND UV SENSITIVE 81; Short=AtMUS81 [Arabidopsis thaliana]
2941	Bni11T015707	1125	1242	1165	2072	2593	82.56	89.37	87.98	143.22	221.86	86.6367	182.54	1.0752	5.87e-06	4.83e-05	Up	Full=Cryptochrome-1; AltName: Full=Blue light photoreceptor [Sinapis alba]
178	Bni01T001023	229	257	299	420	1045	16.81	18.49	22.58	29.03	89.41	19.2933	59.22	1.618	0.0005772	0.00272702	Up	Full=Cryptochrome-1; Short=AtCry; Short=Atcry1; AltName: Full=Blue light photoreceptor; AltName: Full=Protein BLUE LIGHT UNINHIBITED 1; AltName: Full=Protein ELONGATED HYPOCOTYL 4; AltName: Full=Protein OUT OF PHASE 2; Short=OOP2 [Arabidopsis thaliana]
2079	Bni07T010890	585	640	622	1231	1247	42.93	46.05	46.97	85.09	106.7	45.3167	95.895	1.0814	2.99e-09	4.93e-08	Up	Full=CSC1-like protein At1g32090 [Arabidopsis thaliana]
2835	Bni10T014974	59	29	13	5	0	4.33	2.09	0.98	0.35	0	2.46667	0.175	-3.8171	0.00223697	0.00871821	Down	Full=CSC1-like protein At3g54510 [Arabidopsis thaliana]
1753	Bni06T009246	142	123	90	20	6	10.42	8.85	6.8	1.38	0.51	8.69	0.945	-3.201	5.65e-09	8.85e-08	Down	Full=CSC1-like protein At4g02900 [Arabidopsis thaliana]
287	Bni01T001550	2254	2179	2187	1152	882	165.42	156.8	165.16	79.63	75.47	162.46	77.55	-1.0669	2.13e-17	1.11e-15	Down	Full=CST complex subunit CTC1; AltName: Full=Protein CONSERVED TELOMERE MAINTENANCE COMPONENT 1; Short=AtCTC1 [Arabidopsis thaliana]
1393	Bni05T007265	1611	1513	1374	4908	2134	118.23	108.88	103.76	339.26	182.59	110.29	260.925	1.2423	1.5e-05	0.000111716	Up	Full=CTP synthase 1; AltName: Full=CTP synthetase 1; AltName: Full=UTP--ammonia ligase 1 [Cricetulus griseus]
1624	Bni06T008498	999	970	958	498	299	73.31	69.8	72.35	34.42	25.58	71.82	30	-1.2594	1.71e-10	3.4e-09	Down	Full=CTP synthase; AltName: Full=CTP synthetase; AltName: Full=UTP--ammonia ligase [Dictyostelium discoideum]
670	Bni03T003747	236	228	111	573	706	17.32	16.41	8.38	39.61	60.41	14.0367	50.01	1.833	5.1e-06	4.25e-05	Up	Full=Cucumisin; AltName: Allergen=Cuc m 1; Flags: Precursor [Cucumis melo]
1323	Bni05T006952	82	132	197	45	28	6.02	9.5	14.88	3.11	2.4	10.1333	2.755	-1.879	0.000225891	0.00121287	Down	Full=Cullin-1 [Arabidopsis thaliana]
1511	Bni05T007870	21	50	111	0	0	1.54	3.6	8.38	0	0	4.50667	0.001	-12.1378	1.1e-06	1.07e-05	Down	Full=Cullin-1 [Arabidopsis thaliana]
2638	Bni10T014067	26	57	51	18	11	1.91	4.1	3.85	1.24	0.94	3.28667	1.09	-1.5923	0.0127222	0.0374682	Down	Full=Cullin-1 [Arabidopsis thaliana]
2532	Bni09T013500	3039	2679	1871	1073	859	223.02	192.78	141.3	74.17	73.5	185.7	73.835	-1.3306	1.06e-07	1.29e-06	Down	Full=Cullin-3A; Short=AtCUL3a [Arabidopsis thaliana]
1054	Bni04T005720	41	43	28	0	0	3.01	3.09	2.11	0	0	2.73667	0.001	-11.4182	1.56e-06	1.46e-05	Down	Full=Cyanidin 3-O-galactoside 2''-O-xylosyltransferase FGGT1; AltName: Full=Flavonoid 3-O-glycoside glycosyltransferase 1; AltName: Full=UDP-xylose flavonoid O-glycosyltransferase 6B; Short=AcUFGT6b [Actinidia chinensis var. chinensis]
1055	Bni04T005721	0	0	0	155	69	0	0	0	10.71	5.9	0.001	8.305	13.0198	4.47e-12	1.17e-10	Up	Full=Cyanidin 3-O-galactoside 2''-O-xylosyltransferase FGGT1; AltName: Full=Flavonoid 3-O-glycoside glycosyltransferase 1; AltName: Full=UDP-xylose flavonoid O-glycosyltransferase 6B; Short=AcUFGT6b [Actinidia chinensis var. chinensis]
1202	Bni04T006361	106	75	16	11	6	7.78	5.4	1.21	0.76	0.51	4.79667	0.635	-2.9172	0.00128381	0.00542182	Down	Full=Cyclic nucleotide-gated ion channel 18; AltName: Full=Cyclic nucleotide- and calmodulin-regulated ion channel 18 [Arabidopsis thaliana]
838	Bni03T004608	7	6	9	0	0	0.51	0.43	0.68	0	0	0.54	0.001	-9.0768	0.00827705	0.0263441	Down	Full=Cyclic nucleotide-gated ion channel 2; Short=AtCNGC2; AltName: Full=Cyclic nucleotide- and calmodulin-regulated ion channel 2; AltName: Full=Protein DEFENSE NO DEATH 1 [Arabidopsis thaliana]
262	Bni01T001432	751	703	671	448	202	55.11	50.59	50.67	30.97	17.28	52.1233	24.125	-1.1114	0.000159861	0.000895644	Down	Full=Cyclin-A3-4; AltName: Full=G2/mitotic-specific cyclin-A3-4; Short=CycA3;4 [Arabidopsis thaliana]
3619	BniUnT019377	404	316	164	56	25	29.65	22.74	12.39	3.87	2.14	21.5933	3.005	-2.8451	1.3e-08	1.9e-07	Down	Full=Cyclin-B2-5; AltName: Full=G2/mitotic-specific cyclin-B2-5; Short=CycB2;5 [Arabidopsis thaliana]
2551	Bni09T013604	86	100	69	230	229	6.31	7.2	5.21	15.9	19.59	6.24	17.745	1.5078	6.16e-07	6.43e-06	Up	Full=Cyclin-D1-1; AltName: Full=Cyclin-delta-1; Short=Cyclin-d1; AltName: Full=G1/S-specific cyclin-D1-1; Short=CycD1;1 [Arabidopsis thaliana]
3373	Bni13T018027	820	554	214	0	0	60.18	39.87	16.16	0	0	38.7367	0.001	-15.2414	2.11e-13	6.65e-12	Down	Full=Cyclin-D1-1; AltName: Full=G1/S-specific cyclin-D1-1; Short=CycD1;1 [Oryza sativa Japonica Group]
3501	Bni14T018744	201	190	152	90	52	14.75	13.67	11.48	6.22	4.45	13.3	5.335	-1.3179	4.5e-05	0.000293983	Down	Full=Cyclin-D4-1; AltName: Full=G1/S-specific cyclin-D4-1; Short=CycD4;1 [Oryza sativa Japonica Group]
3375	Bni13T018030	240	0	0	0	0	17.61	0	0	0	0	5.87	0.001	-12.5191	4.76e-07	5.07e-06	Down	Full=Cyclin-D4-2; AltName: Full=G1/S-specific cyclin-D4-2; Short=CycD4;2 [Oryza sativa Japonica Group]
251	Bni01T001397	616	387	258	83	44	45.21	27.85	19.48	5.74	3.76	30.8467	4.75	-2.6991	2.51e-09	4.2e-08	Down	Full=Cyclin-D5-1; AltName: Full=G1/S-specific cyclin-D5-1; Short=CycD5;1 [Oryza sativa Japonica Group]
2305	Bni08T012148	11	9	51	0	0	0.81	0.65	3.85	0	0	1.77	0.001	-10.7895	0.000266919	0.00140136	Down	Full=Cyclin-dependent kinase F-1; Short=CDKF;1; AltName: Full=CDK-activating kinase 1-At; Short=CAK1-At [Arabidopsis thaliana]
1824	Bni06T009542	386	344	344	233	95	28.33	24.75	25.98	16.11	8.13	26.3533	12.12	-1.1206	0.00127268	0.00538268	Down	Full=Cyclin-dependent kinase inhibitor 3; AltName: Full=KIP-related protein 3 [Oryza sativa Japonica Group]
1982	Bni07T010421	177	140	61	12	7	12.99	10.07	4.61	0.83	0.6	9.22333	0.715	-3.6893	1.45e-08	2.09e-07	Down	Full=Cyclin-dependent protein kinase inhibitor SMR3; AltName: Full=Protein SIAMESE-RELATED 3 [Arabidopsis thaliana]
2436	Bni09T013020	114	81	68	20	13	8.37	5.83	5.14	1.38	1.11	6.44667	1.245	-2.3724	2.03e-06	1.86e-05	Down	Full=Cyclin-J18 [Arabidopsis thaliana]
2426	Bni09T012983	742	712	595	21	8	54.45	51.24	44.93	1.45	0.68	50.2067	1.065	-5.559	3.98e-53	1.72e-50	Down	Full=Cyclin-SDS-like; AltName: Full=Protein SOLO DANCERS-like; Short=OsSDS [Oryza sativa Japonica Group]
1747	Bni06T009223	295	340	333	1144	986	21.65	24.47	25.15	79.08	84.36	23.7567	81.72	1.7824	3.29e-27	4.12e-25	Up	Full=Cyclin-U3-1; Short=CycU3;1; AltName: Full=Cyclin-P1.1; Short=CycP1;1 [Arabidopsis thaliana]
39	Bni01T000302	174	149	205	541	1207	12.77	10.72	15.48	37.4	103.27	12.99	70.335	2.4368	6.65e-08	8.46e-07	Up	Full=Cycloartenol synthase 2 [Betula platyphylla]
970	Bni04T005295	660	747	632	1972	968	48.44	53.75	47.73	136.31	82.82	49.9733	109.565	1.1326	1.11e-05	8.52e-05	Up	Full=Cyprosin; Flags: Precursor [Cynara cardunculus]
1179	Bni04T006240	6374	5969	4865	2730	2232	467.77	429.53	367.41	188.71	190.98	421.57	189.845	-1.151	4.59e-11	1.02e-09	Down	Full=Cystathionine gamma-synthase 1, chloroplastic; Short=AtCGS1; AltName: Full=METHIONINE OVERACCUMULATION 1; AltName: Full=O-succinylhomoserine (thiol)-lyase; Flags: Precursor [Arabidopsis thaliana]
1549	Bni05T008019	2037	1569	901	609	417	149.49	112.91	68.04	42.1	35.68	110.147	38.89	-1.502	3.07e-05	0.000209926	Down	Full=Cysteine protease XCP1; AltName: Full=Xylem cysteine peptidase 1; Short=AtXCP1; Flags: Precursor [Arabidopsis thaliana]
317	Bni01T001693	857	928	982	1889	1753	62.89	66.78	74.16	130.58	149.99	67.9433	140.285	1.046	8.55e-11	1.81e-09	Up	Full=Cysteine proteinase COT44; Flags: Precursor [Brassica napus]
631	Bni02T003502	15	13	4	0	0	1.1	0.94	0.3	0	0	0.78	0.001	-9.6073	0.0032535	0.0120286	Down	Full=Cysteine proteinase; Flags: Precursor [Theileria annulata]
1384	Bni05T007232	39	41	39	132	356	2.86	2.95	2.95	9.12	30.46	2.92	19.79	2.7607	9.22e-07	9.13e-06	Up	Full=Cysteine-rich receptor-like protein kinase 10; Short=Cysteine-rich RLK10; AltName: Full=Receptor-like protein kinase 4; Flags: Precursor [Arabidopsis thaliana]
2569	Bni09T013679	3874	4558	4872	9256	9992	284.3	327.99	367.93	639.81	854.94	326.74	747.375	1.1937	6.44e-09	9.98e-08	Up	Full=Cysteine-rich receptor-like protein kinase 2; Short=Cysteine-rich RLK2; Flags: Precursor [Arabidopsis thaliana]
1339	Bni05T007019	541	585	491	1553	742	39.7	42.1	37.08	107.35	63.49	39.6267	85.42	1.1081	4.25e-05	0.000279667	Up	Full=Cysteine-rich receptor-like protein kinase 25; Short=Cysteine-rich RLK25; Flags: Precursor [Arabidopsis thaliana]
3071	Bni12T016449	130	122	96	19	4	9.54	8.78	7.25	1.31	0.34	8.52333	0.825	-3.369	7.44e-09	1.14e-07	Down	Full=Cystinosin homolog [Drosophila melanogaster]
257	Bni01T001418	3962	3886	3815	11627	4560	290.76	279.64	288.11	803.7	390.17	286.17	596.935	1.0607	0.000554162	0.00263113	Up	Full=Cytochrome b5 type B; AltName: Full=Cytochrome b5 outer mitochondrial membrane isoform; Flags: Precursor [Homo sapiens]
3410	Bni13T018188	4	4	4	10	31	0.29	0.29	0.3	0.69	2.65	0.293333	1.67	2.5092	0.0150333	0.0429634	Up	Full=Cytochrome b561 and DOMON domain-containing protein At4g17280; AltName: Full=Protein b561A.tha2; Flags: Precursor [Arabidopsis thaliana]
996	Bni04T005411	470	362	293	16	13	34.49	26.05	22.13	1.11	1.11	27.5567	1.11	-4.6338	1.05e-29	1.63e-27	Down	Full=Cytochrome b561 and DOMON domain-containing protein At5g47530; AltName: Full=Protein b561A.tha10; Flags: Precursor [Arabidopsis thaliana]
1085	Bni04T005852	60	66	64	202	84	4.4	4.75	4.83	13.96	7.19	4.66	10.575	1.1823	0.00402355	0.0144548	Up	Full=Cytochrome b561 domain-containing protein At4g18260; AltName: Full=Protein b561A.tha13; Flags: Precursor [Arabidopsis thaliana]
2296	Bni08T012105	50	61	53	22	16	3.67	4.39	4	1.52	1.37	4.02	1.445	-1.4761	0.0015849	0.00649553	Down	Full=Cytochrome B5-like protein; Short=AtCb5LP; AltName: Full=Cytochrome b5 isoform F; Short=AtCb5-F [Arabidopsis thaliana]
1831	Bni06T009577	73	63	80	178	138	5.36	4.53	6.04	12.3	11.81	5.31	12.055	1.1828	6.7e-05	0.000420635	Up	Full=Cytochrome b6-f complex subunit 7; AltName: Full=Cytochrome b6-f complex subunit PetM; AltName: Full=Cytochrome b6-f complex subunit VII [Spinacia oleracea]
480	Bni02T002688	199	204	257	658	313	14.6	14.68	19.41	45.48	26.78	16.23	36.13	1.1545	0.000253156	0.00133601	Up	Full=Cytochrome b-c1 complex subunit 8; AltName: Full=Complex III subunit 8; AltName: Full=Complex III subunit VII; AltName: Full=Ubiquinol-cytochrome c reductase complex 8.2 kDa protein; AltName: Full=Ubiquinol-cytochrome c reductase complex ubiquinone-binding protein QP-C [Solanum tuberosum]
3186	Bni12T017061	75	52	85	36	25	5.5	3.74	6.42	2.49	2.14	5.22	2.315	-1.173	0.0122043	0.0361959	Down	Full=Cytochrome b-c1 complex subunit 9; AltName: Full=Complex III subunit 9; AltName: Full=Complex III subunit X; AltName: Full=Ubiquinol-cytochrome c reductase complex 8.0 kDa protein [Solanum tuberosum]
123	Bni01T000836	3444	3262	3026	2029	956	252.75	234.73	228.52	140.25	81.8	238.667	111.025	-1.1041	2.55e-05	0.000178245	Down	Full=Cytochrome c [Vigna radiata var. radiata]
1839	Bni06T009609	223	214	215	528	584	16.37	15.4	16.24	36.5	49.97	16.0033	43.235	1.4338	1.54e-09	2.67e-08	Up	Full=Cytochrome c biogenesis protein CCS1, chloroplastic; AltName: Full=C-type cytochrome synthesis protein 1; Flags: Precursor [Oryza sativa Japonica Group]
1409	Bni05T007352	935	804	631	267	233	68.62	57.86	47.65	18.46	19.94	58.0433	19.2	-1.596	9.69e-11	2.02e-09	Down	Full=Cytochrome c oxidase assembly protein COX19 [Pyricularia oryzae Y34]
3601	BniUnT019255	12	17	30	73	40	0.88	1.22	2.27	5.05	3.42	1.45667	4.235	1.5397	0.0127686	0.0375637	Up	Full=Cytochrome c oxidase subunit 1; AltName: Full=Cytochrome c oxidase polypeptide I [Arabidopsis thaliana] >P60621.1 RecName: Full=Cytochrome c oxidase subunit 1; AltName: Full=Cytochrome c oxidase polypeptide I [Raphanus sativus]
1556	Bni05T008069	465	484	428	288	160	34.13	34.83	32.32	19.91	13.69	33.76	16.8	-1.0069	3.67e-05	0.000245985	Down	Full=Cytochrome c oxidase subunit 5b-1, mitochondrial; Short=AtCOX5b-1; Flags: Precursor [Arabidopsis thaliana]
18	Bni01T000162	5	3	5	122	80	0.37	0.22	0.38	8.43	6.85	0.323333	7.64	4.5625	8.59e-14	2.88e-12	Up	Full=Cytochrome c oxidase-assembly factor COX23, mitochondrial; Flags: Precursor [Saccharomyces cerevisiae S288C]
1222	Bni04T006435	237	204	182	972	554	17.39	14.68	13.74	67.19	47.4	15.27	57.295	1.9077	1.14e-13	3.74e-12	Up	Full=Cytochrome P450 [Helianthus annuus]
2584	Bni09T013743	9	8	9	47	17	0.66	0.58	0.68	3.25	1.45	0.64	2.35	1.8765	0.0115315	0.0345685	Up	Full=Cytochrome P450 [Helianthus annuus]
3086	Bni12T016555	18	38	37	70	75	1.32	2.73	2.79	4.84	6.42	2.28	5.63	1.3041	0.0122451	0.0363107	Up	Full=Cytochrome P450 [Helianthus annuus]
2138	Bni07T011213	14	16	21	137	115	1.03	1.15	1.59	9.47	9.84	1.25667	9.655	2.9417	3.04e-12	8.15e-11	Up	Full=Cytochrome P450 1A1; AltName: Full=CYPIA1; AltName: Full=Cytochrome P450 form 6; AltName: Full=Cytochrome P450-C; AltName: Full=Cytochrome P450-P1; AltName: Full=DAH1; AltName: Full=Hydroperoxy icosatetraenoate dehydratase [Canis lupus familiaris]
2473	Bni09T013197	293	236	147	1290	629	21.5	16.98	11.1	89.17	53.82	16.5267	71.495	2.113	1.77e-08	2.53e-07	Up	Full=Cytochrome P450 306a1; Short=CYPCCCVIA1; AltName: Full=Protein phantom; Short=Dmphm [Drosophila melanogaster]
2218	Bni08T011725	26036	20585	11240	0	0	1910.71	1481.3	848.85	0	0	1413.62	0.001	-20.431	8.62e-29	1.2e-26	Down	Full=Cytochrome P450 703A2; AltName: Full=Laurate 7-monooxygenase [Oryza sativa Japonica Group]
1079	Bni04T005820	20440	15568	9127	334	188	1500.04	1120.28	689.27	23.09	16.09	1103.2	19.59	-5.8154	1.01e-57	6e-55	Down	Full=Cytochrome P450 704B1; AltName: Full=Long-chain fatty acid omega-hydroxylase [Arabidopsis thaliana]
19	Bni01T000163	50	39	35	116	69	3.67	2.81	2.64	8.02	5.9	3.04	6.96	1.195	0.00332117	0.0122447	Up	Full=Cytochrome P450 714C2 [Oryza sativa Japonica Group]
479	Bni02T002679	388	379	225	1460	801	28.47	27.27	16.99	100.92	68.54	24.2433	84.73	1.8053	2.2e-08	3.09e-07	Up	Full=Cytochrome P450 714C2 [Oryza sativa Japonica Group]
2705	Bni10T014377	9	14	1	118	54	0.66	1.01	0.08	8.16	4.62	0.583333	6.39	3.4534	9.11e-05	0.000548316	Up	Full=Cytochrome P450 71A3; AltName: Full=CYPLXXIA3; AltName: Full=Cytochrome P-450EG3 [Solanum melongena]
2704	Bni10T014375	15	17	13	20	142	1.1	1.22	0.98	1.38	12.15	1.1	6.765	2.6206	0.00405136	0.0145366	Up	Full=Cytochrome P450 71A4; AltName: Full=CYPLXXIA4; AltName: Full=Cytochrome P-450EG2 [Solanum melongena]
307	Bni01T001665	29	9	20	58	59	2.13	0.65	1.51	4.01	5.05	1.43	4.53	1.6635	0.010897	0.033016	Up	Full=Cytochrome P450 71B1; AltName: Full=CYPLXXIB1 [Thlaspi arvense]
2582	Bni09T013735	96	111	89	363	381	7.05	7.99	6.72	25.09	32.6	7.25333	28.845	1.9916	7.72e-14	2.62e-12	Up	Full=Cytochrome P450 71B35 [Arabidopsis thaliana]
3315	Bni13T017779	107	114	98	9	14	7.85	8.2	7.4	0.62	1.2	7.81667	0.91	-3.1026	4.9e-11	1.08e-09	Down	Full=Cytochrome P450 71D11 [Lotus japonicus]
3426	Bni13T018265	74	77	40	157	171	5.43	5.54	3.02	10.85	14.63	4.66333	12.74	1.4499	0.000542025	0.00258416	Up	Full=Cytochrome P450 71D11 [Lotus japonicus]
724	Bni03T004074	48	45	42	259	1052	3.52	3.24	3.17	17.9	90.01	3.31	53.955	4.0269	9.25e-11	1.94e-09	Up	Full=Cytochrome P450 71D8; AltName: Full=Cytochrome P450 CP7 [Glycine max]
1110	Bni04T005942	97	152	187	701	248	7.12	10.94	14.12	48.46	21.22	10.7267	34.84	1.6995	0.000189804	0.00104493	Up	Full=Cytochrome P450 724B1; AltName: Full=Dwarf protein 11; AltName: Full=OsDWARF11 [Oryza sativa Japonica Group]
738	Bni03T004145	998	826	656	454	197	73.24	59.44	49.54	31.38	16.86	60.74	24.12	-1.3324	9.55e-05	0.000571531	Down	Full=Cytochrome P450 77A3 [Glycine max]
1500	Bni05T007799	1214	1340	1382	4242	1627	89.09	96.43	104.37	293.22	139.21	96.63	216.215	1.1619	0.000314663	0.00161425	Up	Full=Cytochrome P450 77A3 [Glycine max]
2601	Bni09T013828	33	22	26	632	560	2.42	1.58	1.96	43.69	47.92	1.98667	45.805	4.5271	1.59e-53	7.04e-51	Up	Full=Cytochrome P450 78A5; AltName: Full=Protein KLUH [Arabidopsis thaliana]
2010	Bni07T010579	10	6	10	30	176	0.73	0.43	0.76	2.07	15.06	0.64	8.565	3.7423	3.43e-05	0.000231261	Up	Full=Cytochrome P450 78A9 [Arabidopsis thaliana]
2226	Bni08T011765	358	404	367	621	1364	26.27	29.07	27.72	42.93	116.71	27.6867	79.82	1.5276	0.000265955	0.001398	Up	Full=Cytochrome P450 78A9 [Arabidopsis thaliana]
263	Bni01T001434	218	195	147	674	624	16	14.03	11.1	46.59	53.39	13.71	49.99	1.8664	1.7e-13	5.38e-12	Up	Full=Cytochrome P450 81Q32; Short=CrCYP81Q32 [Catharanthus roseus]
2349	Bni08T012415	12	9	13	0	0	0.88	0.65	0.98	0	0	0.836667	0.001	-9.7085	0.00123286	0.00524382	Down	Full=Cytochrome P450 87A3 [Oryza sativa Japonica Group]
3548	Bni14T018962	374	281	229	1119	411	27.45	20.22	17.29	77.35	35.17	21.6533	56.26	1.3775	0.000618442	0.00289887	Up	Full=Cytochrome P450 90B1; AltName: Full=Protein DWARF 4; Short=Dwarf4; AltName: Full=Steroid 22-alpha-hydroxylase [Arabidopsis thaliana]
2363	Bni08T012476	271	230	235	619	387	19.89	16.55	17.75	42.79	33.11	18.0633	37.95	1.071	2.5e-06	2.25e-05	Up	Full=Cytochrome P450 CYP72A219; AltName: Full=Cytochrome P450 CYP72A129 [Panax ginseng]
2496	Bni09T013336	140	123	84	311	195	10.27	8.85	6.34	21.5	16.68	8.48667	19.09	1.1695	0.000432468	0.0021176	Up	Full=Cytochrome P450 CYP749A22; AltName: Full=Cytochrome P450 CYP749A20 [Panax ginseng]
2503	Bni09T013360	2620	2238	1631	3585	5217	192.27	161.05	123.17	247.81	446.38	158.83	347.095	1.1278	0.000574098	0.00271311	Up	Full=Cytochrome P450 CYP749A22; AltName: Full=Cytochrome P450 CYP749A20 [Panax ginseng]
291	Bni01T001569	362	377	299	913	810	26.57	27.13	22.58	63.11	69.31	25.4267	66.21	1.3807	3.72e-13	1.14e-11	Up	Full=Cytochrome P450 CYP82D47 [Panax ginseng]
1832	Bni06T009578	31	20	8	35	109	2.28	1.44	0.6	2.42	9.33	1.44	5.875	2.0285	0.0159394	0.0451346	Up	Full=Cytochrome P450 CYP82D47 [Panax ginseng]
218	Bni01T001240	194	164	151	477	324	14.24	11.8	11.4	32.97	27.72	12.48	30.345	1.2818	7.31e-08	9.19e-07	Up	Full=Cytokinin dehydrogenase 7; AltName: Full=Cytokinin oxidase 7; Short=AtCKX5; Short=AtCKX7; Short=CKO7 [Arabidopsis thaliana]
1145	Bni04T006070	181	181	154	1	1	13.28	13.02	11.63	0.07	0.09	12.6433	0.08	-7.3042	4.62e-12	1.21e-10	Down	Full=Cytokinin hydroxylase; AltName: Full=Cytochrome P450 35A1 [Arabidopsis thaliana]
3171	Bni12T016993	196	138	93	15	6	14.38	9.93	7.02	1.04	0.51	10.4433	0.775	-3.7522	9.83e-11	2.05e-09	Down	Full=Cytokinin riboside 5'-monophosphate phosphoribohydrolase LOG7; AltName: Full=Protein LONELY GUY 7 [Arabidopsis thaliana]
300	Bni01T001635	999	579	167	23	19	73.31	41.66	12.61	1.59	1.63	42.5267	1.61	-4.7232	3.89e-12	1.02e-10	Down	Full=Cytosolic purine 5'-nucleotidase; AltName: Full=Cytosolic 5'-nucleotidase II [Mus musculus]
792	Bni03T004391	43	55	60	542	206	3.16	3.96	4.53	37.47	17.63	3.88333	27.55	2.8267	2.25e-11	5.25e-10	Up	Full=Cytosolic sulfotransferase 14; Short=AtSOT14; AltName: Full=Sulfotransferase 2b; Short=AtST2b [Arabidopsis thaliana]
2500	Bni09T013355	279	308	372	61	39	20.48	22.16	28.09	4.22	3.34	23.5767	3.78	-2.6409	1.27e-18	7.74e-17	Down	Full=Cytosolic sulfotransferase 15; Short=AtSOT15; AltName: Full=Sulfotransferase 2a; Short=AtST2a [Arabidopsis thaliana]
1560	Bni05T008093	147	125	90	316	275	10.79	9	6.8	21.84	23.53	8.86333	22.685	1.3558	7.86e-06	6.28e-05	Up	Full=DCC family protein At1g52590, chloroplastic; Flags: Precursor [Arabidopsis thaliana]
1248	Bni04T006547	8151	8430	8092	13026	20837	598.18	606.62	611.11	900.41	1782.87	605.303	1341.64	1.1483	0.000137952	0.000789544	Up	Full=DCD domain-containing protein NRP-B; AltName: Full=N-rich protein B [Glycine max]
1577	Bni05T008175	1412	1112	795	481	514	103.62	80.02	60.04	33.25	43.98	81.2267	38.615	-1.0728	0.000548746	0.00260828	Down	Full=DCN1-like protein 4; AltName: Full=DCUN1 domain-containing protein 4; AltName: Full=Defective in cullin neddylation protein 1-like protein 4 [Mus musculus]
2896	Bni11T015435	150	168	192	99	48	11.01	12.09	14.5	6.84	4.11	12.5333	5.475	-1.1948	0.000826674	0.00372726	Down	Full=dCTP pyrophosphatase 1; AltName: Full=Deoxycytidine-triphosphatase 1; Short=dCTPase 1; AltName: Full=RS21-C6 [Rattus norvegicus]
2648	Bni10T014142	10	9	11	34	28	0.73	0.65	0.83	2.35	2.4	0.736667	2.375	1.6888	0.00754414	0.0243798	Up	Full=dCTP pyrophosphatase 1; AltName: Full=Deoxycytidine-triphosphatase 1; Short=dCTPase 1; AltName: Full=RS21C6; AltName: Full=XTP3-transactivated gene A protein [Homo sapiens]
66	Bni01T000507	594	690	788	376	161	43.59	49.65	59.51	25.99	13.78	50.9167	19.885	-1.3565	3.59e-05	0.00024122	Down	Full=DDT domain-containing protein DDR4; AltName: Full=DDT-related protein 4 [Arabidopsis thaliana]
1598	Bni06T008339	205	211	243	88	64	15.04	15.18	18.35	6.08	5.48	16.19	5.78	-1.486	3.28e-08	4.43e-07	Down	Full=DEAD-box ATP-dependent RNA helicase 10; AltName: Full=Protein ENHANCER OF ASYMMETRIC LEAVES TWO [Arabidopsis thaliana]
131	Bni01T000882	54	67	44	0	0	3.96	4.82	3.32	0	0	4.03333	0.001	-11.9778	1.22e-07	1.46e-06	Down	Full=DEAD-box ATP-dependent RNA helicase FANCM; AltName: Full=Fanconia anemia complementation group M-like protein [Arabidopsis thaliana]
132	Bni01T000883	26	24	21	0	0	1.91	1.73	1.59	0	0	1.74333	0.001	-10.7676	2.06e-05	0.000148122	Down	Full=DEAD-box ATP-dependent RNA helicase FANCM; AltName: Full=Fanconia anemia complementation group M-like protein [Arabidopsis thaliana]
133	Bni01T000887	1357	1324	1275	790	447	99.59	95.28	96.29	54.61	38.25	97.0533	46.43	-1.0637	3.95e-07	4.28e-06	Down	Full=DEAD-box ATP-dependent RNA helicase FANCM; AltName: Full=Fanconia anemia complementation group M-like protein [Arabidopsis thaliana]
260	Bni01T001430	166	129	124	396	175	12.18	9.28	9.36	27.37	14.97	10.2733	21.17	1.0431	0.0040961	0.0146727	Up	Full=Death-associated inhibitor of apoptosis 2; AltName: Full=Apoptosis 2 inhibitor; AltName: Full=IAP homolog A; AltName: Full=IAP-like protein; Short=ILP; Short=dILP; AltName: Full=Inhibitor of apoptosis 2 [Drosophila melanogaster]
2447	Bni09T013060	68	64	56	167	86	4.99	4.61	4.23	11.54	7.36	4.61	9.45	1.0355	0.00479611	0.0167597	Up	Full=Defensin-like protein 1; AltName: Full=Cp-thionin I; AltName: Full=Cp-thionin-1; AltName: Full=Gamma-thionin I [Vigna unguiculata]
2143	Bni07T011223	1	7	16	48	107	0.07	0.5	1.21	3.32	9.16	0.593333	6.24	3.3946	0.000665868	0.00308435	Up	Full=Dehydration-responsive element-binding protein 1F; Short=Protein DREB1F [Arabidopsis thaliana]
810	Bni03T004495	1829	1220	667	160	190	134.23	87.79	50.37	11.06	16.26	90.7967	13.66	-2.7327	6.87e-10	1.25e-08	Down	Full=Dehydration-responsive element-binding protein 2G; Short=Protein DREB2G [Arabidopsis thaliana]
353	Bni01T001846	3044	3132	3018	5719	8853	223.39	225.38	227.92	395.32	757.49	225.563	576.405	1.3536	4.31e-06	3.66e-05	Up	Full=Dehydrin DHN1; AltName: Full=Dehydration stress-inducible protein 1; AltName: Full=Dehydrin 1; Short=OsDhn1; AltName: Full=Low tmperature-induced protein 9; Short=OsLIP9 [Oryza sativa Japonica Group]
988	Bni04T005383	32	36	44	0	0	2.35	2.59	3.32	0	0	2.75333	0.001	-11.427	1.37e-06	1.3e-05	Down	Full=Dehydrodolichyl diphosphate synthase 6; Short=Dedol-PP synthase 6 [Arabidopsis thaliana]
616	Bni02T003421	3175	3048	2830	1574	1081	233	219.33	213.72	108.8	92.49	222.017	100.645	-1.1414	3.08e-14	1.09e-12	Down	Full=Dehydrogenase/reductase SDR family protein 7-like [Dictyostelium discoideum]
638	Bni02T003546	405	524	417	1	0	29.72	37.71	31.49	0.07	0	32.9733	0.035	-9.8797	7.83e-12	1.97e-10	Down	Full=Delta(12)-acyl-lipid-desaturase; AltName: Full=Delta(12)-oleate desaturase; Short=PgFAD2 [Punica granatum]
3143	Bni12T016863	5231	5767	5738	11621	21449	383.89	414.99	433.34	803.29	1835.24	410.74	1319.27	1.6834	1.11e-06	1.08e-05	Up	Full=Delta(12)-fatty-acid desaturase FAD2 [Vernicia fordii]
2455	Bni09T013090	175	158	100	79	45	12.84	11.37	7.55	5.46	3.85	10.5867	4.655	-1.1854	0.00371771	0.0134794	Down	Full=Delta(24)-sterol reductase; AltName: Full=Cell elongation protein diminuto [Pisum sativum]
650	Bni03T003648	283	226	215	0	0	20.77	16.26	16.24	0	0	17.7567	0.001	-14.1161	3.17e-12	8.47e-11	Down	Full=Deoxyhypusine hydroxylase-B; Short=DOHH-B; AltName: Full=Deoxyhypusine dioxygenase-B; AltName: Full=Deoxyhypusine monooxygenase-B [Oryza sativa Japonica Group]
2192	Bni08T011578	188	252	313	1575	541	13.8	18.13	23.64	108.87	46.29	18.5233	77.58	2.0663	6.48e-07	6.7e-06	Up	Full=Deoxyhypusine synthase [Brassica napus]
2558	Bni09T013640	337	284	289	49	61	24.73	20.44	21.83	3.39	5.22	22.3333	4.305	-2.3751	2.1e-14	7.62e-13	Down	Full=Deoxynucleoside triphosphate triphosphohydrolase SAMHD1 homolog; Short=dNTPase [Dictyostelium discoideum]
2453	Bni09T013083	288	253	189	116	89	21.14	18.21	14.27	8.02	7.62	17.8733	7.82	-1.1926	8.33e-05	0.000509176	Down	Full=DEP domain-containing protein 1B; AltName: Full=HBV X-transactivated gene 8 protein; AltName: Full=HBV XAg-transactivated protein 8 [Homo sapiens]
3025	Bni11T016174	6624	4529	1795	435	205	486.12	325.91	135.56	30.07	17.54	315.863	23.805	-3.73	2.64e-13	8.24e-12	Down	Full=Desiccation-related protein PCC13-62; Flags: Precursor [Craterostigma plantagineum]
295	Bni01T001606	465	566	519	1409	726	34.13	40.73	39.2	97.4	62.12	38.02	79.76	1.0689	2.07e-05	0.000148332	Up	Full=DeSI-like protein At4g17486 [Arabidopsis thaliana]
1216	Bni04T006410	517	472	459	69	47	37.94	33.97	34.66	4.77	4.02	35.5233	4.395	-3.0148	1.84e-36	4.23e-34	Down	Full=DExH-box ATP-dependent RNA helicase DExH17; AltName: Full=ATP-dependent DNA helicase homolog MER3; AltName: Full=Protein ROCK-N-ROLLERS [Arabidopsis thaliana]
3281	Bni13T017625	456	493	474	1894	1081	33.46	35.48	35.8	130.92	92.49	34.9133	111.705	1.6778	1.31e-15	5.62e-14	Up	Full=Diacylglycerol kinase 3; Short=AtDGK3; Short=DAG kinase 3; AltName: Full=Diglyceride kinase 3; Short=DGK 3 [Arabidopsis thaliana]
2281	Bni08T011979	829	737	821	274	254	60.84	53.03	62	18.94	21.73	58.6233	20.335	-1.5275	1.43e-15	6.04e-14	Down	Full=Diacylglycerol O-acyltransferase 1; Short=CaDGAT1 [Corylus americana]
2343	Bni08T012393	511	447	371	202	151	37.5	32.17	28.02	13.96	12.92	32.5633	13.44	-1.2767	1.42e-07	1.68e-06	Down	Full=Digalactosyldiacylglycerol synthase 2, chloroplastic [Lotus japonicus]
1913	Bni06T010006	389	460	487	1290	530	28.55	33.1	36.78	89.17	45.35	32.81	67.26	1.0356	0.0014918	0.006169	Up	Full=Dirigent protein 19; Short=AtDIR19; Flags: Precursor [Arabidopsis thaliana]
3153	Bni12T016896	23	58	60	189	228	1.69	4.17	4.53	13.06	19.51	3.46333	16.285	2.2333	9.4e-06	7.37e-05	Up	Full=Dirigent protein 21; Short=AtDIR21; Flags: Precursor [Arabidopsis thaliana]
692	Bni03T003888	21	17	5	0	0	1.54	1.22	0.38	0	0	1.04667	0.001	-10.0316	0.00104228	0.0045555	Down	Full=Dirigent protein 24; Short=AtDIR24; Flags: Precursor [Arabidopsis thaliana]
3591	Bni14T019165	65	65	32	434	377	4.77	4.68	2.42	30	32.26	3.95667	31.13	2.9759	9.21e-16	4.02e-14	Up	Full=Dirigent protein 4; Short=AtDIR4; Flags: Precursor [Arabidopsis thaliana]
2683	Bni10T014298	76	51	59	256	142	5.58	3.67	4.46	17.7	12.15	4.57	14.925	1.7075	2.96e-06	2.61e-05	Up	Full=Disease resistance protein PIK6-NP [Oryza sativa Japonica Group]
3116	Bni12T016740	351	381	386	572	823	25.76	27.42	29.15	39.54	70.42	27.4433	54.98	1.0025	0.000874161	0.00390973	Up	Full=Disease resistance protein RGA2; AltName: Full=Blight resistance protein RPI; AltName: Full=RGA2-blb [Solanum bulbocastanum]
672	Bni03T003755	135	117	98	249	262	9.91	8.42	7.4	17.21	22.42	8.57667	19.815	1.2081	4.13e-05	0.000273107	Up	Full=Disease resistance protein RPM1; AltName: Full=Resistance to Pseudomonas syringae protein 3 [Arabidopsis thaliana]
2685	Bni10T014310	13	20	15	1	0	0.95	1.44	1.13	0.07	0	1.17333	0.035	-5.0671	0.00276197	0.0104438	Down	Full=Disease resistance protein RPM1; AltName: Full=Resistance to Pseudomonas syringae protein 3 [Arabidopsis thaliana]
3340	Bni13T017912	52	41	49	95	91	3.82	2.95	3.7	6.57	7.79	3.49	7.18	1.0408	0.00453467	0.0159885	Up	Full=Disease resistance protein RPM1; AltName: Full=Resistance to Pseudomonas syringae protein 3 [Arabidopsis thaliana]
3368	Bni13T018013	12	22	25	50	76	0.88	1.58	1.89	3.46	6.5	1.45	4.98	1.7801	0.00329165	0.0121463	Up	Full=Disease resistance protein RPM1; AltName: Full=Resistance to Pseudomonas syringae protein 3 [Arabidopsis thaliana]
3370	Bni13T018023	50	35	47	98	105	3.67	2.52	3.55	6.77	8.98	3.24667	7.875	1.2783	0.00141293	0.00587943	Up	Full=Disease resistance protein RPM1; AltName: Full=Resistance to Pseudomonas syringae protein 3 [Arabidopsis thaliana]
3444	Bni13T018335	69	59	54	237	153	5.06	4.25	4.08	16.38	13.09	4.46333	14.735	1.7231	2.54e-08	3.53e-07	Up	Full=Disease resistance protein RPM1; AltName: Full=Resistance to Pseudomonas syringae protein 3 [Arabidopsis thaliana]
1442	Bni05T007518	39	46	56	0	0	2.86	3.31	4.23	0	0	3.46667	0.001	-11.7593	3.27e-07	3.59e-06	Down	Full=Disease resistance protein RPP13; AltName: Full=Resistance to Peronospora parasitica protein 13 [Arabidopsis thaliana]
1951	Bni07T010228	110	93	81	136	311	8.07	6.69	6.12	9.4	26.61	6.96	18.005	1.3712	0.00641283	0.0213585	Up	Full=Disease resistance protein RPV1; AltName: Full=NAD(+) hydrolase RPV1; AltName: Full=Resistance to Plasmopara viticola protein; Short=MrRVP1 [Vitis rotundifolia]
2777	Bni10T014685	42	67	83	210	128	3.08	4.82	6.27	14.52	10.95	4.72333	12.735	1.4309	0.000469244	0.0022742	Up	Full=Disease resistance protein RPV1; AltName: Full=NAD(+) hydrolase RPV1; AltName: Full=Resistance to Plasmopara viticola protein; Short=MrRVP1 [Vitis rotundifolia]
3070	Bni12T016429	12	12	1	0	0	0.88	0.86	0.08	0	0	0.606667	0.001	-9.2448	0.0172632	0.0480406	Down	Full=Disease resistance protein RPV1; AltName: Full=NAD(+) hydrolase RPV1; AltName: Full=Resistance to Plasmopara viticola protein; Short=MrRVP1 [Vitis rotundifolia]
3335	Bni13T017887	461	466	442	207	86	33.83	33.53	33.38	14.31	7.36	33.58	10.835	-1.6319	5.88e-07	6.16e-06	Down	Full=Disease resistance protein RUN1; AltName: Full=NAD(+) hydrolase RUN1; AltName: Full=NADP(+) hydrolase RUN1; AltName: Full=Resistance to Uncinula necator protein; Short=MrRUN1 [Vitis rotundifolia]
3557	Bni14T019008	351	348	310	132	141	25.76	25.04	23.41	9.12	12.06	24.7367	10.59	-1.2239	7.03e-07	7.17e-06	Down	Full=Disease resistance RPP13-like protein 4; AltName: Full=Disease resistance protein ZAR1; AltName: Full=Protein HOPZ-ACTIVATED RESISTANCE 1; Short=AtZAR1 [Arabidopsis thaliana]
213	Bni01T001217	303	406	464	214	86	22.24	29.22	35.04	14.79	7.36	28.8333	11.075	-1.3804	0.000344603	0.001743	Down	Full=DNA cross-link repair 1A protein; AltName: Full=SNM1 homolog A; Short=hSNM1; Short=hSNM1A [Homo sapiens]
588	Bni02T003231	370	489	472	654	1422	27.15	35.19	35.65	45.21	121.67	32.6633	83.44	1.3531	0.00136726	0.0057225	Up	Full=DNA damage-repair/toleration protein DRT102 [Arabidopsis thaliana]
3244	Bni13T017393	310	324	341	181	82	22.75	23.32	25.75	12.51	7.02	23.94	9.765	-1.2937	4.77e-05	0.000309929	Down	Full=DNA endonuclease RBBP8 [Danio rerio]
2031	Bni07T010634	815	767	695	192	197	59.81	55.19	52.49	13.27	16.86	55.83	15.065	-1.8898	6.79e-19	4.28e-17	Down	Full=DNA mismatch repair protein MSH4; Short=AtMSH4; AltName: Full=MutS protein homolog 4 [Arabidopsis thaliana]
3409	Bni13T018173	324	309	310	19	17	23.78	22.24	23.41	1.31	1.45	23.1433	1.38	-4.0679	8.34e-36	1.82e-33	Down	Full=DNA mismatch repair protein MSH5; Short=AtMSH5; AltName: Full=MutS protein homolog 5 [Arabidopsis thaliana]
1467	Bni05T007629	181	213	213	71	32	13.28	15.33	16.09	4.91	2.74	14.9	3.825	-1.9618	3.65e-08	4.88e-07	Down	Full=DNA oxidative demethylase ALKBH2; AltName: Full=Alkylated DNA repair protein alkB homolog 2; AltName: Full=Alpha-ketoglutarate-dependent dioxygenase alkB homolog 2 [Arabidopsis thaliana]
3522	Bni14T018830	1056	1313	1725	956	378	77.5	94.48	130.27	66.08	32.34	100.75	49.21	-1.0338	0.00536798	0.0184667	Down	Full=DNA polymerase alpha catalytic subunit [Oryza sativa Japonica Group]
1801	Bni06T009420	341	366	338	106	116	25.03	26.34	25.53	7.33	9.93	25.6333	8.63	-1.5706	1.99e-10	3.92e-09	Down	Full=DNA polymerase kappa; Short=AtPOLK [Arabidopsis thaliana]
2236	Bni08T011820	415	351	207	116	39	30.46	25.26	15.63	8.02	3.34	23.7833	5.68	-2.066	2.16e-05	0.000154472	Down	Full=DNA repair protein RAD51 homolog [Solanum lycopersicum]
2193	Bni08T011584	202	225	224	104	91	14.82	16.19	16.92	7.19	7.79	15.9767	7.49	-1.0929	8.09e-06	6.43e-05	Down	Full=DNA repair protein RAD51 homolog 3; AltName: Full=DNA repair-recombination protein RAD51C; Short=AtRAD51C [Arabidopsis thaliana]
2945	Bni11T015731	177	293	338	162	89	12.99	21.08	25.53	11.2	7.62	19.8667	9.41	-1.0781	0.00601771	0.0202936	Down	Full=DNA repair protein RAD5B; AltName: Full=Putative SWI/SNF-related matrix-associated actin-dependent regulator of chromatin subfamily A member 3-like 3; Short=SMARCA3-like protein 3; AltName: Full=RAD5 homolog B; Short=AtRAD5B [Arabidopsis thaliana]
3635	BniUnT019496	253	257	330	154	83	18.57	18.49	24.92	10.65	7.1	20.66	8.875	-1.219	9.82e-05	0.00058597	Down	Full=DNA repair protein RAD5B; AltName: Full=Putative SWI/SNF-related matrix-associated actin-dependent regulator of chromatin subfamily A member 3-like 3; Short=SMARCA3-like protein 3; AltName: Full=RAD5 homolog B; Short=AtRAD5B [Arabidopsis thaliana]
24	Bni01T000201	331	357	497	208	91	24.29	25.69	37.53	14.38	7.79	29.17	11.085	-1.3959	0.000169287	0.000943317	Down	Full=DNA replication ATP-dependent helicase/nuclease JHS1; AltName: Full=Protein EMBRYO DEFECTIVE 2411; AltName: Full=Protein JING HE SHENG 1; Includes: RecName: Full=DNA replication nuclease JHS1; Includes: RecName: Full=DNA replication ATP-dependent helicase JHS1 [Arabidopsis thaliana]
2913	Bni11T015522	563	508	527	188	100	41.32	36.56	39.8	13	8.56	39.2267	10.78	-1.8635	4.1e-13	1.25e-11	Down	Full=DNA replication complex GINS protein SLD5; AltName: Full=GINS complex subunit 4; Contains: RecName: Full=DNA replication complex GINS protein SLD5, N-terminally processed [Rattus norvegicus]
3317	Bni13T017784	2477	2629	2642	1552	714	181.78	189.18	199.52	107.28	61.09	190.16	84.185	-1.1756	1.09e-05	8.41e-05	Down	Full=DNA replication licensing factor MCM5; AltName: Full=Minichromosome maintenance protein 5; Short=AtMCM5 [Arabidopsis thaliana]
1104	Bni04T005922	657	727	844	293	122	48.22	52.32	63.74	20.25	10.44	54.76	15.345	-1.8354	2.83e-08	3.87e-07	Down	Full=DNA topoisomerase 3-alpha [Oryza sativa Japonica Group]
899	Bni03T004849	207	198	208	132	67	15.19	14.25	15.71	9.12	5.73	15.05	7.425	-1.0193	0.00108384	0.00470737	Down	Full=DNA-directed primase/polymerase protein; Short=hPrimpol1; AltName: Full=Coiled-coil domain-containing protein 111 [Homo sapiens]
341	Bni01T001789	137	154	153	84	46	10.05	11.08	11.55	5.81	3.94	10.8933	4.875	-1.16	0.000357781	0.00180016	Down	Full=DNA-directed RNA polymerase I subunit RPA12; AltName: Full=DNA-directed RNA polymerase I subunit H [Macaca mulatta]
3594	BniUnT019228	3	11	16	60	25	0.22	0.79	1.21	4.15	2.14	0.74	3.145	2.0875	0.0150068	0.042907	Up	Full=DNA-directed RNA polymerase subunit beta; AltName: Full=PEP; AltName: Full=Plastid-encoded RNA polymerase subunit beta; Short=RNA polymerase subunit beta [Morus indica]
3595	BniUnT019229	5	15	33	113	45	0.37	1.08	2.49	7.81	3.85	1.31333	5.83	2.1503	0.00989668	0.0304893	Up	Full=DNA-directed RNA polymerase subunit beta''; AltName: Full=PEP; AltName: Full=Plastid-encoded RNA polymerase subunit beta''; Short=RNA polymerase subunit beta'' [Morus indica]
790	Bni03T004386	3481	4281	5519	2470	1789	255.46	308.06	416.8	170.74	153.07	326.773	161.905	-1.0131	3.58e-05	0.00024056	Down	Full=DNA-directed RNA polymerase V subunit 1; AltName: Full=DNA-directed RNA polymerase D subunit 1b; Short=AtNRPD1b; Short=Nuclear RNA polymerase D 1b; AltName: Full=DNA-directed RNA polymerase E subunit 1; Short=Nuclear RNA polymerase E 1; AltName: Full=Protein DEFECTIVE IN MERISTEM SILENCING 5; AltName: Full=Protein DEFECTIVE IN RNA-DIRECTED DNA METHYLATION 3; AltName: Full=Protein RNA-DIRECTE…
2301	Bni08T012138	317	342	346	185	117	23.26	24.61	26.13	12.79	10.01	24.6667	11.4	-1.1135	1.07e-06	1.04e-05	Down	Full=DNA-directed RNA polymerases II and IV subunit 5A; Short=RPB5a; AltName: Full=DNA-directed RNA polymerase II subunit E; AltName: Full=RNA polymerase I, II and III 24.3 kDa subunit; Short=AtRPB24.3 [Arabidopsis thaliana]
2398	Bni09T012737	76	56	36	21	21	5.58	4.03	2.72	1.45	1.8	4.11	1.625	-1.3387	0.0175379	0.0486795	Down	Full=DnaJ homolog subfamily B member 6; AltName: Full=MRJ [Bos taurus]
634	Bni02T003515	555	504	478	1323	867	40.73	36.27	36.1	91.45	74.18	37.7	82.815	1.1353	8.66e-10	1.55e-08	Up	Full=DnaJ protein ERDJ7; AltName: Full=Chaperone protein dnaJ C79; Short=OsDjC79; AltName: Full=Endoplasmic reticulum dnaJ domain-containing protein 7; Short=OsERdj7; Flags: Precursor [Oryza sativa Japonica Group]
397	Bni02T002213	2733	2223	1571	184	189	200.57	159.97	118.64	12.72	16.17	159.727	14.445	-3.467	2e-31	3.45e-29	Down	Full=DnaJ protein homolog ANJ1; Flags: Precursor [Atriplex nummularia]
2654	Bni10T014168	37	50	42	78	153	2.72	3.6	3.17	5.39	13.09	3.16333	9.24	1.5464	0.0028589	0.0107422	Up	Full=Dof zinc finger protein DOF1.5; Short=AtDOF1.5 [Arabidopsis thaliana]
3532	Bni14T018873	59	60	96	188	172	4.33	4.32	7.25	13	14.72	5.3	13.86	1.3869	0.000160665	0.000899568	Up	Full=Dof zinc finger protein DOF2.2; Short=AtDOF2.2 [Arabidopsis thaliana]
681	Bni03T003822	16	29	24	41	96	1.17	2.09	1.81	2.83	8.21	1.69	5.52	1.7076	0.00972361	0.0300512	Up	Full=Dof zinc finger protein DOF5.1; Short=AtDOF5.1; AltName: Full=Protein PHLOEM EARLY DOF 2 [Arabidopsis thaliana]
1288	Bni05T006814	54	79	81	276	274	3.96	5.68	6.12	19.08	23.44	5.25333	21.26	2.0168	1.82e-10	3.61e-09	Up	Full=Dof zinc finger protein DOF5.3; Short=AtDOF5.3; AltName: Full=Protein PHLOEM EARLY DOF TMO6; AltName: Full=Protein TARGET OF MONOPTEROS 6; Short=Protein TARGET OF MP 6 [Arabidopsis thaliana]
1429	Bni05T007434	29	28	52	113	58	2.13	2.01	3.93	7.81	4.96	2.69	6.385	1.2471	0.0150968	0.0431164	Up	Full=Dof zinc finger protein DOF5.4; Short=AtDOF5.4; AltName: Full=OBF-binding protein 4 [Arabidopsis thaliana]
1701	Bni06T008910	926	789	433	183	152	67.96	56.78	32.7	12.65	13.01	52.48	12.83	-2.0322	2.58e-08	3.57e-07	Down	Full=Dolichol-phosphate mannose synthase subunit 3; Short=DPM synthase subunit 3; AltName: Full=Dol-P-Man synthase1; AltName: Full=Dolichol phosphate-mannose biosynthesis regulatory protein [Arabidopsis thaliana]
447	Bni02T002536	1377	1361	1217	1752	12008	101.05	97.94	91.91	121.11	1027.44	96.9667	574.275	2.5662	0.00950231	0.0295045	Up	Full=Dormancy-associated protein 1; Short=AtDRM1; AltName: Full=Dormancy-associated protein-like 1; Short=AtDYL1 [Arabidopsis thaliana]
1257	Bni04T006582	326	370	421	1082	416	23.92	26.63	31.79	74.79	35.59	27.4467	55.19	1.0078	0.00427919	0.015215	Up	Full=Double-stranded RNA-binding protein 2; AltName: Full=dsRNA-binding protein 2; AltName: Full=dsRNA-binding protein 3; Short=OsDRB3 [Oryza sativa Japonica Group]
2105	Bni07T011046	7164	6397	4506	1581	1502	525.75	460.33	340.29	109.28	128.52	442.123	118.9	-1.8947	2.74e-14	9.8e-13	Down	Full=Double-stranded RNA-binding protein 3; AltName: Full=dsRNA-binding protein 3 [Oryza sativa Japonica Group]
1411	Bni05T007356	587	410	181	0	0	43.08	29.5	13.67	0	0	28.75	0.001	-14.8113	1.09e-12	3.12e-11	Down	Full=Dual specificity protein kinase zak2; AltName: Full=Tyrosine-protein kinase 4; AltName: Full=Zaphod K Kinase 2; Short=Zaphod kinase 2 [Dictyostelium discoideum]
2988	Bni11T015930	1688	1125	556	162	121	123.88	80.96	41.99	11.2	10.35	82.2767	10.775	-2.9328	1e-10	2.08e-09	Down	Full=Dual specificity protein phosphatase 1B; Short=AtDsPTP1B; AltName: Full=MAPK phosphatase 2; Short=AtMKP2 [Arabidopsis thaliana]
830	Bni03T004583	496	603	778	95	34	36.4	43.39	58.75	6.57	2.91	46.18	4.74	-3.2843	3.14e-16	1.47e-14	Down	Full=DUF724 domain-containing protein 3; Short=AtDUF3 [Arabidopsis thaliana]
3380	Bni13T018048	123	170	205	35	14	9.03	12.23	15.48	2.42	1.2	12.2467	1.81	-2.7583	4.04e-09	6.48e-08	Down	Full=DUF724 domain-containing protein 3; Short=AtDUF3 [Arabidopsis thaliana]
761	Bni03T004261	690	829	873	1379	2035	50.64	59.65	65.93	95.32	174.12	58.74	134.72	1.1975	8.05e-05	0.00049402	Up	Full=Dynamin-like protein ARC5; AltName: Full=Dynamin-related protein 5B; AltName: Full=Protein ACCUMULATION AND REPLICATION OF CHLOROPLASTS 5 [Arabidopsis thaliana]
2217	Bni08T011718	177	183	135	83	28	12.99	13.17	10.2	5.74	2.4	12.12	4.07	-1.5743	0.000571429	0.00270271	Down	Full=Dynamin-related protein 1B; AltName: Full=Dynamin-like protein B [Arabidopsis thaliana]
3366	Bni13T018004	2	2	0	28	85	0.15	0.14	0	1.94	7.27	0.0966667	4.605	5.574	2.17e-06	1.97e-05	Up	Full=Dynein light chain LC6, flagellar outer arm [Heliocidaris crassispina]
2748	Bni10T014557	553	478	419	253	93	40.58	34.4	31.64	17.49	7.96	35.54	12.725	-1.4818	9.02e-05	0.00054295	Down	Full=E2F transcription factor-like E2FE; AltName: Full=DP-E2F-like protein 1; AltName: Full=E2F-like repressor E2L3 [Arabidopsis thaliana]
628	Bni02T003488	2172	2269	2125	1430	689	159.4	163.28	160.48	98.85	58.95	161.053	78.9	-1.0294	4.77e-05	0.000310158	Down	Full=E3 ubiquitin ligase BIG BROTHER-related; Short=AtBBR; AltName: Full=RING-type E3 ubiquitin transferase BIG BROTHER-related [Arabidopsis thaliana]
1929	Bni07T010090	59	90	94	305	261	4.33	6.48	7.1	21.08	22.33	5.97	21.705	1.8622	1.85e-09	3.15e-08	Up	Full=E3 ubiquitin protein ligase RIE1; AltName: Full=Protein RING-FINGER FOR EMBRYOGENESIS 1; AltName: Full=RING-type E3 ubiquitin transferase RIE1 [Arabidopsis thaliana]
2369	Bni08T012500	549	594	564	293	166	40.29	42.74	42.59	20.25	14.2	41.8733	17.225	-1.2815	1.88e-08	2.68e-07	Down	Full=E3 ubiquitin-protein ligase CCNB1IP1 homolog; AltName: Full=RING finger-containing protein HEI10; AltName: Full=RING-type E3 ubiquitin transferase HEI10 [Arabidopsis thaliana]
1489	Bni05T007710	776	768	758	2836	1994	56.95	55.27	57.24	196.04	170.61	56.4867	183.325	1.6984	5.25e-34	1.04e-31	Up	Full=E3 ubiquitin-protein ligase COP1; AltName: Full=Constitutive photomorphogenesis protein 1; AltName: Full=RING-type E3 ubiquitin transferase COP1 [Pisum sativum]
502	Bni02T002783	31	32	34	90	48	2.28	2.3	2.57	6.22	4.11	2.38333	5.165	1.1158	0.0107868	0.0327395	Up	Full=E3 ubiquitin-protein ligase EL5; AltName: Full=Protein ELICITOR 5; AltName: Full=RING-type E3 ubiquitin transferase EL5 [Oryza sativa Japonica Group]
468	Bni02T002636	3370	2578	1636	1095	689	247.32	185.51	123.55	75.69	58.95	185.46	67.32	-1.462	1.13e-05	8.64e-05	Down	Full=E3 ubiquitin-protein ligase HEL2; AltName: Full=Histone E3 ligase 2; AltName: Full=RING-type E3 ubiquitin transferase HEL2 [Saccharomyces cerevisiae S288C]
2730	Bni10T014478	45	47	36	64	149	3.3	3.38	2.72	4.42	12.75	3.13333	8.585	1.4541	0.0104872	0.0319762	Up	Full=E3 ubiquitin-protein ligase PUB22; AltName: Full=Plant U-box protein 22; AltName: Full=RING-type E3 ubiquitin transferase PUB22; AltName: Full=U-box domain-containing protein 22 [Arabidopsis thaliana]
2755	Bni10T014593	70	64	78	0	0	5.14	4.61	5.89	0	0	5.21333	0.001	-12.348	1.84e-08	2.63e-07	Down	Full=E3 ubiquitin-protein ligase RDUF1; AltName: Full=RING and DUF1117 domain-containing protein 1; Short=AtRDUF1; AltName: Full=RING-type E3 ubiquitin transferase RDUF1 [Arabidopsis thaliana]
2404	Bni09T012807	61	71	46	107	235	4.48	5.11	3.47	7.4	20.11	4.35333	13.755	1.6598	0.00167276	0.00679848	Up	Full=E3 ubiquitin-protein ligase RHA2B; AltName: Full=RING-H2 finger A2b; AltName: Full=RING-H2 zinc finger protein RHA2b; AltName: Full=RING-type E3 ubiquitin transferase RHA2B [Arabidopsis thaliana]
739	Bni03T004146	217	237	281	446	1121	15.93	17.05	21.22	30.83	95.92	18.0667	63.375	1.8106	0.000128999	0.000745714	Up	Full=E3 ubiquitin-protein ligase RING1; AltName: Full=RING-H2 finger protein ATL55; AltName: Full=RING-type E3 ubiquitin transferase ATL55 [Arabidopsis thaliana]
2269	Bni08T011942	107	90	76	11	34	7.85	6.48	5.74	0.76	2.91	6.69	1.835	-1.8662	0.00326521	0.0120642	Down	Full=E3 ubiquitin-protein ligase RING1; AltName: Full=RING-H2 finger protein ATL55; AltName: Full=RING-type E3 ubiquitin transferase ATL55 [Arabidopsis thaliana]
1298	Bni05T006854	306	352	292	425	817	22.46	25.33	22.05	29.38	69.9	23.28	49.64	1.0924	0.00533006	0.0183545	Up	Full=E3 ubiquitin-protein ligase RMA1H1; AltName: Full=Protein RING membrane-anchor 1 homolog 1; AltName: Full=RING-type E3 ubiquitin transferase RMA1H1 [Capsicum annuum]
56	Bni01T000444	54	50	47	99	113	3.96	3.6	3.55	6.84	9.67	3.70333	8.255	1.1564	0.00176406	0.00711139	Up	Full=E3 ubiquitin-protein ligase RNF126; AltName: Full=RING finger protein 126 [Bos taurus]
2152	Bni07T011266	22	12	4	0	0	1.61	0.86	0.3	0	0	0.923333	0.001	-9.8507	0.0022117	0.00863532	Down	Full=E3 ubiquitin-protein ligase RNF126; AltName: Full=RING finger protein 126 [Xenopus tropicalis]
2580	Bni09T013719	10	10	10	40	21	0.73	0.72	0.76	2.76	1.8	0.736667	2.28	1.6299	0.013504	0.0393878	Up	Full=E3 ubiquitin-protein ligase RNF133; AltName: Full=Goliath-related E3 ubiquitin-protein ligase 2; AltName: Full=RING finger protein 133; AltName: Full=RING-type E3 ubiquitin transferase RNF133 [Mus musculus]
525	Bni02T002906	425	515	461	670	1669	31.19	37.06	34.81	46.31	142.8	34.3533	94.555	1.4607	0.0011781	0.0050532	Up	Full=E3 ubiquitin-protein ligase RNF181; AltName: Full=RING finger protein 181; AltName: Full=RING-type E3 ubiquitin transferase RNF181 [Bos taurus]
3250	Bni13T017447	72	94	123	238	277	5.28	6.76	9.29	16.45	23.7	7.11	20.075	1.4975	3.98e-05	0.000264531	Up	Full=E3 ubiquitin-protein ligase RNF181; AltName: Full=RING finger protein 181; AltName: Full=RING-type E3 ubiquitin transferase RNF181 [Danio rerio]
2087	Bni07T010961	501	320	174	0	0	36.77	23.03	13.14	0	0	24.3133	0.001	-14.5695	2.56e-12	6.97e-11	Down	Full=E3 ubiquitin-protein ligase RNF181; AltName: Full=RING finger protein 181; AltName: Full=RING-type E3 ubiquitin transferase RNF181 [Xenopus tropicalis]
1996	Bni07T010492	13	9	2	0	0	0.95	0.65	0.15	0	0	0.583333	0.001	-9.1882	0.0129682	0.0380632	Down	Full=E3 ubiquitin-protein ligase WAV3; AltName: Full=Protein WAVY GROWTH 3; AltName: Full=RING-type E3 ubiquitin transferase WAV3 [Arabidopsis thaliana]
3489	Bni14T018671	776	818	801	1765	1400	56.95	58.86	60.49	122	119.79	58.7667	120.895	1.0407	6.51e-17	3.27e-15	Up	Full=E3 ubiquitin-protein ligase WAVH1; AltName: Full=Protein WAV3 homolog 1; AltName: Full=RING-type E3 ubiquitin transferase WAVH1 [Arabidopsis thaliana]
1599	Bni06T008350	3307	2720	1711	684	602	242.69	195.73	129.22	47.28	51.51	189.213	49.395	-1.9376	2.78e-10	5.39e-09	Down	Full=E3 ubiquitin-protein ligase ZNF598; AltName: Full=Zinc finger protein 598 [Mus musculus]
2967	Bni11T015809	311	276	194	858	361	22.82	19.86	14.65	59.31	30.89	19.11	45.1	1.2388	0.000789862	0.00358845	Up	Full=Early light-induced protein 2, chloroplastic; Flags: Precursor [Arabidopsis thaliana]
284	Bni01T001525	425	477	507	2019	805	31.19	34.32	38.29	139.56	68.88	34.6	104.22	1.5908	1.11e-06	1.08e-05	Up	Full=Early nodulin-like protein 1; AltName: Full=Phytocyanin-like protein; Flags: Precursor [Arabidopsis thaliana]
2006	Bni07T010567	730	685	643	295	218	53.57	49.29	48.56	20.39	18.65	50.4733	19.52	-1.3706	1.18e-14	4.43e-13	Down	Full=Early nodulin-like protein 1; AltName: Full=Phytocyanin-like protein; Flags: Precursor [Arabidopsis thaliana]
2384	Bni08T012578	290	344	330	918	490	21.28	24.75	24.92	63.46	41.93	23.65	52.695	1.1558	4.15e-06	3.54e-05	Up	Full=Early nodulin-like protein 2; AltName: Full=Phytocyanin-like protein; Flags: Precursor [Arabidopsis thaliana]
1754	Bni06T009247	19	21	23	145	356	1.39	1.51	1.74	10.02	30.46	1.54667	20.24	3.71	6.55e-11	1.42e-09	Up	Full=EID1-like F-box protein 3 [Arabidopsis thaliana]
2009	Bni07T010577	449	427	392	159	104	32.95	30.73	29.6	10.99	8.9	31.0933	9.945	-1.6446	1.2e-13	3.95e-12	Down	Full=Embryogenesis-associated protein EMB8 [Picea glauca]
231	Bni01T001335	217	162	82	553	219	15.93	11.66	6.19	38.23	18.74	11.26	28.485	1.339	0.00785339	0.025214	Up	Full=Endo-1,4-beta-xylanase 1; Short=AtXyn1; Short=Xylan endohydrolase 1; Short=Xylanase 1 [Arabidopsis thaliana]
1637	Bni06T008570	326	329	389	130	47	23.92	23.67	29.38	8.99	4.02	25.6567	6.505	-1.9797	3.36e-07	3.68e-06	Down	Full=Endo-1,4-beta-xylanase 4; Short=AtXyn4; Short=Xylan endohydrolase 4; Short=Xylanase 4; Flags: Precursor [Arabidopsis thaliana]
1800	Bni06T009418	3248	2368	934	493	204	238.36	170.4	70.54	34.08	17.45	159.767	25.765	-2.6325	3.71e-07	4.03e-06	Down	Full=Endo-1,4-beta-xylanase 5; Short=AtXyn5; Short=Xylan endohydrolase 5; Short=Xylanase 5; Flags: Precursor [Arabidopsis thaliana]
216	Bni01T001230	380	222	19	1	0	27.89	15.98	1.43	0.07	0	15.1	0.035	-8.753	6.38e-07	6.62e-06	Down	Full=Endoglucanase 16; AltName: Full=Endo-1,4-beta glucanase 16; Flags: Precursor [Arabidopsis thaliana]
1792	Bni06T009401	2900	3936	4536	17062	6445	212.82	283.24	342.56	1179.39	551.45	279.54	865.42	1.6303	4.27e-06	3.64e-05	Up	Full=Endoglucanase 17; AltName: Full=Endo-1,4-beta glucanase 17; Flags: Precursor [Arabidopsis thaliana]
1931	Bni07T010096	1852	1794	1862	5026	3532	135.91	129.1	140.62	347.42	302.21	135.21	324.815	1.2644	4.01e-21	3.15e-19	Up	Full=Endoglucanase 19; AltName: Full=Endo-1,4-beta glucanase 19; Flags: Precursor [Arabidopsis thaliana]
1865	Bni06T009725	206	218	182	548	329	15.12	15.69	13.74	37.88	28.15	14.85	33.015	1.1527	1.2e-06	1.16e-05	Up	Full=Endoglucanase 24; AltName: Full=Endo-1,4-beta glucanase 24; Flags: Precursor [Arabidopsis thaliana]
2418	Bni09T012897	624	863	911	3826	1712	45.79	62.1	68.8	264.47	146.48	58.8967	205.475	1.8027	7.62e-09	1.17e-07	Up	Full=Endoglucanase 8; AltName: Full=Cellulase 1; Short=AtCEL1; AltName: Full=Endo-1,4-beta glucanase 8; Flags: Precursor [Arabidopsis thaliana]
2412	Bni09T012865	83	60	17	14	2	6.09	4.32	1.28	0.97	0.17	3.89667	0.57	-2.7732	0.00512366	0.017754	Down	Full=Endonuclease 2; Short=AtENDO2; AltName: Full=Deoxyribonuclease ENDO2; AltName: Full=Single-stranded-nucleate endonuclease ENDO2; Flags: Precursor [Arabidopsis thaliana]
1315	Bni05T006922	11	8	9	59	17	0.81	0.58	0.68	4.08	1.45	0.69	2.765	2.0026	0.00938471	0.0292076	Up	Full=Endonuclease 4; Short=AtENDO4; AltName: Full=Deoxyribonuclease ENDO4; AltName: Full=Single-stranded-nucleate endonuclease ENDO4; Flags: Precursor [Arabidopsis thaliana]
3141	Bni12T016859	2019	1611	973	586	219	148.17	115.93	73.48	40.51	18.74	112.527	29.625	-1.9254	5.52e-06	4.57e-05	Down	Full=Enoyl-[acyl-carrier-protein] reductase [NADH] 1, chloroplastic; Short=ENR; AltName: Full=NADH-dependent enoyl-ACP reductase; Flags: Precursor [Oryza sativa Japonica Group]
637	Bni02T003539	3231	2814	2334	1103	598	237.11	202.5	176.26	76.24	51.17	205.29	63.705	-1.6882	2.37e-11	5.5e-10	Down	Full=Enoyl-[acyl-carrier-protein] reductase [NADH], chloroplastic; Short=ENR; AltName: Full=NADH-dependent enoyl-ACP reductase 1; AltName: Full=Protein MOSAIC DEATH 1; Flags: Precursor [Arabidopsis thaliana]
1744	Bni06T009216	48	66	34	27	410	3.52	4.75	2.57	1.87	35.08	3.61333	18.475	2.3542	0.0140429	0.040719	Up	Full=Ent-copalyl diphosphate synthase, chloroplastic; Short=SmCPSent; Flags: Precursor [Salvia miltiorrhiza]
290	Bni01T001562	119	122	112	302	285	8.73	8.78	8.46	20.88	24.39	8.65667	22.635	1.3867	3.74e-09	6.04e-08	Up	Full=Ent-kaurene oxidase, chloroplastic; Short=AtKO1; AltName: Full=Cytochrome P450 701A3 [Arabidopsis thaliana]
25	Bni01T000209	459	384	257	1079	597	33.68	27.63	19.41	74.58	51.08	26.9067	62.83	1.2235	0.000161713	0.000904557	Up	Full=Ent-kaurenoic acid oxidase 1; Short=AtKAO1; AltName: Full=Cytochrome P450 88A3 [Arabidopsis thaliana]
2379	Bni08T012547	475	336	210	40	35	34.86	24.18	15.86	2.76	2.99	24.9667	2.875	-3.1184	9.99e-13	2.89e-11	Down	Full=EP1-like glycoprotein 4; AltName: Full=Curculin-like (Mannose-binding) lectin family protein; Flags: Precursor [Arabidopsis thaliana]
3470	Bni14T018543	11	12	12	58	24	0.81	0.86	0.91	4.01	2.05	0.86	3.03	1.8169	0.0048607	0.0169546	Up	Full=EPIDERMAL PATTERNING FACTOR-like protein 1; Short=EPF-like protein 1; Contains: RecName: Full=MEPFL1; Flags: Precursor [Arabidopsis thaliana]
96	Bni01T000688	80	65	85	144	180	5.87	4.68	6.42	9.95	15.4	5.65667	12.675	1.164	0.00136648	0.00572062	Up	Full=EPIDERMAL PATTERNING FACTOR-like protein 2; Short=EPF-like protein 2; Contains: RecName: Full=MEPFL2; Flags: Precursor [Arabidopsis thaliana]
2380	Bni08T012549	63	72	37	0	3	4.62	5.18	2.79	0	0.26	4.19667	0.13	-5.0127	7.77e-07	7.85e-06	Down	Full=Epidermis-specific secreted glycoprotein EP1; AltName: Full=52/54 kDa medium protein; Flags: Precursor [Daucus carota]
1789	Bni06T009392	358	308	294	998	578	26.27	22.16	22.2	68.99	49.46	23.5433	59.225	1.3309	1.99e-08	2.82e-07	Up	Full=Epoxide hydrolase A; Short=EHB; AltName: Full=Epoxide hydrolase EphA [Mycobacterium tuberculosis H37Rv]
1326	Bni05T006966	501	236	67	42	37	36.77	16.98	5.06	2.9	3.17	19.6033	3.035	-2.6913	0.000316977	0.00162467	Down	Full=Equilibrative nucleotide transporter 3; Short=AtENT3; AltName: Full=Nucleoside transporter ENT3; AltName: Full=Protein FLUOROURIDINE RESISTANT 1 [Arabidopsis thaliana]
3336	Bni13T017897	164	182	122	386	408	12.04	13.1	9.21	26.68	34.91	11.45	30.795	1.4273	6.49e-07	6.7e-06	Up	Full=Equilibrative nucleotide transporter 8; Short=AtENT8; AltName: Full=Nucleoside transporter ENT8 [Arabidopsis thaliana]
1543	Bni05T008001	1388	1291	1323	761	394	101.86	92.9	99.91	52.6	33.71	98.2233	43.155	-1.1865	7.46e-07	7.58e-06	Down	Full=ER lumen protein-retaining receptor A; AltName: Full=HDEL receptor [Arabidopsis thaliana]
615	Bni02T003419	607	648	749	202	79	44.55	46.63	56.56	13.96	6.76	49.2467	10.36	-2.249	7.46e-11	1.6e-09	Down	Full=ER membrane protein complex subunit 10; Flags: Precursor [Xenopus tropicalis]
1630	Bni06T008526	736	625	573	1439	1198	54.01	44.98	43.27	99.47	102.5	47.42	100.985	1.0906	3.32e-09	5.44e-08	Up	Full=Ethylene response sensor 1; Short=AtERS1; AltName: Full=Protein ERS1 [Arabidopsis thaliana]
498	Bni02T002774	36	31	13	79	74	2.64	2.23	0.98	5.46	6.33	1.95	5.895	1.596	0.00526944	0.0181747	Up	Full=Ethylene-overproduction protein 1; AltName: Full=Protein ETHYLENE OVERPRODUCER 1; Short=Protein ETO1 [Arabidopsis thaliana]
1277	Bni05T006756	17	8	9	0	0	1.25	0.58	0.68	0	0	0.836667	0.001	-9.7085	0.00165625	0.00674567	Down	Full=Ethylene-responsive transcription factor 1; Short=NtERF1; AltName: Full=Ethylene-responsive element-binding factor 1; Short=EREBP-1 [Nicotiana tabacum]
2035	Bni07T010661	163	221	336	502	1406	11.96	15.9	25.37	34.7	120.3	17.7433	77.5	2.1269	9.61e-05	0.000574151	Up	Full=Ethylene-responsive transcription factor 2; Short=AtERF2; AltName: Full=Ethylene-responsive element-binding factor 2; Short=EREBP-2 [Arabidopsis thaliana]
2037	Bni07T010664	105	98	45	201	169	7.71	7.05	3.4	13.89	14.46	6.05333	14.175	1.2275	0.005405	0.0185829	Up	Full=Ethylene-responsive transcription factor 2; Short=AtERF2; AltName: Full=Ethylene-responsive element-binding factor 2; Short=EREBP-2 [Arabidopsis thaliana]
1286	Bni05T006801	117	157	138	281	272	8.59	11.3	10.42	19.42	23.27	10.1033	21.345	1.0791	3.14e-05	0.000214038	Up	Full=Ethylene-responsive transcription factor 4; Short=AtERF4; AltName: Full=Ethylene-responsive element-binding factor 4; Short=EREBP-4; AltName: Full=Protein RELATED TO APETALA2 5 [Arabidopsis thaliana]
2207	Bni08T011673	135	129	150	26	9	9.91	9.28	11.33	1.8	0.77	10.1733	1.285	-2.985	7.97e-11	1.69e-09	Down	Full=Ethylene-responsive transcription factor 4; Short=AtERF4; AltName: Full=Ethylene-responsive element-binding factor 4; Short=EREBP-4; AltName: Full=Protein RELATED TO APETALA2 5 [Arabidopsis thaliana]
950	Bni04T005204	272	381	498	896	882	19.96	27.42	37.61	61.94	75.47	28.33	68.705	1.2781	3.16e-05	0.000215157	Up	Full=Ethylene-responsive transcription factor 9; Short=AtERF9; AltName: Full=Ethylene-responsive element-binding factor 9; Short=EREBP-9 [Arabidopsis thaliana]
1285	Bni05T006796	94	85	120	263	548	6.9	6.12	9.06	18.18	46.89	7.36	32.535	2.1442	4.07e-06	3.49e-05	Up	Full=Ethylene-responsive transcription factor 9; Short=AtERF9; AltName: Full=Ethylene-responsive element-binding factor 9; Short=EREBP-9 [Arabidopsis thaliana]
482	Bni02T002696	104	74	75	136	544	7.63	5.33	5.66	9.4	46.55	6.20667	27.975	2.1722	0.000688616	0.00317186	Up	Full=Ethylene-responsive transcription factor CRF3; AltName: Full=Protein CYTOKININ RESPONSE FACTOR 3 [Arabidopsis thaliana]
1562	Bni05T008100	313	189	117	15	2	22.97	13.6	8.84	1.04	0.17	15.1367	0.605	-4.645	1.67e-10	3.34e-09	Down	Full=Ethylene-responsive transcription factor ERF003 [Arabidopsis thaliana]
2247	Bni08T011851	8	13	30	108	692	0.59	0.94	2.27	7.47	59.21	1.26667	33.34	4.7181	4.53e-08	5.97e-07	Up	Full=Ethylene-responsive transcription factor ERF016 [Arabidopsis thaliana]
1410	Bni05T007353	25	23	28	84	250	1.83	1.66	2.11	5.81	21.39	1.86667	13.6	2.8651	5.77e-06	4.75e-05	Up	Full=Ethylene-responsive transcription factor ERF034 [Arabidopsis thaliana]
2033	Bni07T010642	22	19	22	40	89	1.61	1.37	1.66	2.76	7.62	1.54667	5.19	1.7466	0.00570503	0.0194327	Up	Full=Ethylene-responsive transcription factor ERF038 [Arabidopsis thaliana]
2174	Bni08T011483	46	36	32	9	0	3.38	2.59	2.42	0.62	0	2.79667	0.31	-3.1734	0.00215773	0.00844944	Down	Full=Ethylene-responsive transcription factor ERF038 [Arabidopsis thaliana]
91	Bni01T000643	7	5	15	52	20	0.51	0.36	1.13	3.59	1.71	0.666667	2.65	1.991	0.0162647	0.0458527	Up	Full=Ethylene-responsive transcription factor ERF039 [Arabidopsis thaliana]
1933	Bni07T010106	236	212	200	1004	539	17.32	15.26	15.1	69.4	46.12	15.8933	57.76	1.8616	6.31e-13	1.87e-11	Up	Full=Ethylene-responsive transcription factor ERF053; Short=AtERF53 [Arabidopsis thaliana]
841	Bni03T004612	395	398	418	465	2104	28.99	28.64	31.57	32.14	180.02	29.7333	106.08	1.835	0.00212162	0.00832123	Up	Full=Ethylene-responsive transcription factor ERF095 [Arabidopsis thaliana]
1278	Bni05T006757	40	39	26	140	117	2.94	2.81	1.96	9.68	10.01	2.57	9.845	1.9376	3.22e-07	3.54e-06	Up	Full=Ethylene-responsive transcription factor ERF095 [Arabidopsis thaliana]
842	Bni03T004613	95	83	56	114	256	6.97	5.97	4.23	7.88	21.9	5.72333	14.89	1.3794	0.0098652	0.0304452	Up	Full=Ethylene-responsive transcription factor ERF104 [Arabidopsis thaliana]
1821	Bni06T009529	12	16	19	64	176	0.88	1.15	1.43	4.42	15.06	1.15333	9.74	3.0781	4.76e-06	4.01e-05	Up	Full=Ethylene-responsive transcription factor ERF112 [Arabidopsis thaliana]
1631	Bni06T008530	112	99	104	34	10	8.22	7.12	7.85	2.35	0.86	7.73	1.605	-2.2679	1.07e-05	8.31e-05	Down	Full=Ethylene-responsive transcription factor RAP2-2; Short=AtRAP2.2; AltName: Full=Protein RELATED TO APETALA2 2 [Arabidopsis thaliana]
1013	Bni04T005493	24	11	16	40	85	1.76	0.79	1.21	2.76	7.27	1.25333	5.015	2.0005	0.00423144	0.0150856	Up	Full=Ethylene-responsive transcription factor RAP2-4; AltName: Full=Ethylene-responsive transcription factor ERF059; AltName: Full=Protein RELATED TO APETALA2 4 [Arabidopsis thaliana]
3518	Bni14T018815	48	57	46	108	126	3.52	4.1	3.47	7.47	10.78	3.69667	9.125	1.3036	0.000469065	0.00227397	Up	Full=Ethylene-responsive transcription factor RAP2-9; AltName: Full=Protein RELATED TO APETALA2 9 [Arabidopsis thaliana]
2462	Bni09T013118	712	526	276	52	20	52.25	37.85	20.84	3.59	1.71	36.98	2.65	-3.8027	9.07e-14	3.04e-12	Down	Full=Ethylene-responsive transcription factor WRI1; AltName: Full=Protein ACTIVATOR OF SPORAMIN::LUC 1; AltName: Full=Protein WRINKLED 1 [Arabidopsis thaliana]
49	Bni01T000396	238	298	368	1243	562	17.47	21.44	27.79	85.92	48.09	22.2333	67.005	1.5915	2.19e-06	1.99e-05	Up	Full=Eugenol synthase 1 [Ocimum basilicum]
3009	Bni11T016068	2501	2628	2672	1427	1072	183.54	189.11	201.79	98.64	91.72	191.48	95.18	-1.0085	8.27e-16	3.65e-14	Down	Full=Eukaryotic translation initiation factor 2 subunit 3, X-linked; AltName: Full=Eukaryotic translation initiation factor 2 subunit gamma, X-linked; Short=eIF-2-gamma; Short=eIF-2-gamma X; AltName: Full=PP42 [Rattus norvegicus]
147	Bni01T000921	1718	1285	765	0	0	126.08	92.47	57.77	0	0	92.1067	0.001	-16.491	2.43e-17	1.26e-15	Down	Full=Eukaryotic translation initiation factor 3 subunit B; Short=eIF3b; AltName: Full=eIF-3-eta; AltName: Full=eIF3 p110 [Nicotiana tabacum]
2053	Bni07T010749	326	297	248	109	50	23.92	21.37	18.73	7.53	4.28	21.34	5.905	-1.8536	5.65e-08	7.29e-07	Down	Full=Eukaryotic translation initiation factor 3 subunit B; Short=eIF3b; AltName: Full=eIF-3-eta; AltName: Full=eIF3 p110 [Nicotiana tabacum]
1899	Bni06T009929	971	1084	1113	448	234	71.26	78	84.05	30.97	20.02	77.77	25.495	-1.609	4.13e-11	9.23e-10	Down	Full=Eukaryotic translation initiation factor 5B; Short=eIF-5B; AltName: Full=Translation initiation factor IF-2 [Chaetomium thermophilum var. thermophilum DSM 1495]
3168	Bni12T016983	1769	1520	1239	26	11	129.82	109.38	93.57	1.8	0.94	110.923	1.37	-6.3392	3.47e-73	4e-70	Down	Full=Exocyst complex component EXO70A1; Short=AtExo70a1; AltName: Full=Exocyst subunit Exo70 family protein A1 [Arabidopsis thaliana]
2613	Bni09T013877	97	64	22	0	0	7.12	4.61	1.66	0	0	4.46333	0.001	-12.1239	6.43e-07	6.66e-06	Down	Full=Exocyst complex component EXO70B1; Short=AtExo70b1; AltName: Full=Exocyst subunit Exo70 family protein B1 [Arabidopsis thaliana]
546	Bni02T002998	74	128	100	117	1006	5.43	9.21	7.55	8.09	86.08	7.39667	47.085	2.6703	0.000711385	0.00326628	Up	Full=Exocyst complex component EXO70H1; Short=AtExo70h1; AltName: Full=Exocyst subunit Exo70 family protein H1 [Arabidopsis thaliana]
2544	Bni09T013563	780	663	419	55	15	57.24	47.71	31.64	3.8	1.28	45.53	2.54	-4.1639	9.48e-18	5.25e-16	Down	Full=Exocyst complex component EXO84A; Short=AtExo80a [Arabidopsis thaliana]
2466	Bni09T013131	226	216	224	30	32	16.59	15.54	16.92	2.07	2.74	16.35	2.405	-2.7652	4.59e-19	2.97e-17	Down	Full=Exocyst complex component EXO84B; Short=AtExo80b [Arabidopsis thaliana]
1532	Bni05T007970	1299	1044	802	290	104	95.33	75.13	60.57	20.05	8.9	77.01	14.475	-2.4115	9.01e-10	1.61e-08	Down	Full=Exonuclease 1 [Arabidopsis thaliana]
2800	Bni10T014797	34	58	76	22	16	2.5	4.17	5.74	1.52	1.37	4.13667	1.445	-1.5174	0.00969025	0.0299749	Down	Full=Exonuclease 1 [Arabidopsis thaliana]
454	Bni02T002566	1133	995	716	587	338	83.15	71.6	54.07	40.58	28.92	69.6067	34.75	-1.0022	0.000458756	0.00223088	Down	Full=Exonuclease DPD1, chloroplastic/mitochondrial; AltName: Full=Mg2+-dependent DNA exonuclease; AltName: Full=Protein DEFECTIVE IN POLLEN DNA DEGRADATION 1; Flags: Precursor [Arabidopsis thaliana]
455	Bni02T002573	1272	1088	1130	269	124	93.35	78.29	85.34	18.59	10.61	85.66	14.6	-2.5527	1.93e-19	1.31e-17	Down	Full=Exonuclease mut-7 homolog; AltName: Full=Exonuclease 3'-5' domain-containing protein 3 [Homo sapiens]
998	Bni04T005414	2609	1520	36	119	61	191.47	109.38	2.72	8.23	5.22	101.19	6.725	-3.9114	0.0142516	0.0411927	Down	Full=Exopolygalacturonase; Short=ExoPG; AltName: Full=Galacturan 1,4-alpha-galacturonidase; AltName: Full=Pectinase [Oenothera organensis]
1794	Bni06T009403	1394	809	0	2	1	102.3	58.22	0	0.14	0.09	53.5067	0.115	-8.8619	0.00156959	0.00643981	Down	Full=Exopolygalacturonase; Short=ExoPG; AltName: Full=Galacturan 1,4-alpha-galacturonidase; AltName: Full=Pectinase [Oenothera organensis]
1178	Bni04T006229	1524	1511	1499	482	200	111.84	108.73	113.2	33.32	17.11	111.257	25.215	-2.1415	1.17e-12	3.34e-11	Down	Full=Expansin-A1; Short=AtEXPA1; AltName: Full=Alpha-expansin-1; Short=At-EXP1; Short=AtEx1; AltName: Full=Ath-ExpAlpha-1.2; Flags: Precursor [Arabidopsis thaliana]
2526	Bni09T013462	2018	2082	2115	7635	4703	148.1	149.82	159.73	527.76	402.4	152.55	465.08	1.6082	2.02e-21	1.61e-19	Up	Full=Expansin-A1; Short=AtEXPA1; AltName: Full=Alpha-expansin-1; Short=At-EXP1; Short=AtEx1; AltName: Full=Ath-ExpAlpha-1.2; Flags: Precursor [Arabidopsis thaliana]
527	Bni02T002924	1876	2260	2585	7040	3459	137.67	162.63	195.22	486.63	295.96	165.173	391.295	1.2443	4.05e-06	3.48e-05	Up	Full=Expansin-A16; Short=AtEXPA16; AltName: Full=Alpha-expansin-16; Short=At-EXP16; Short=AtEx16; AltName: Full=Ath-ExpAlpha-1.7; Flags: Precursor [Arabidopsis thaliana]
1673	Bni06T008784	70	94	88	37	23	5.14	6.76	6.65	2.56	1.97	6.18333	2.265	-1.4489	0.000410284	0.00202655	Down	Full=Expansin-A20; Short=AtEXPA20; AltName: Full=Alpha-expansin-20; Short=At-EXP20; Short=AtEx20; AltName: Full=Ath-ExpAlpha-1.23; Flags: Precursor [Arabidopsis thaliana]
488	Bni02T002711	1224	1341	1208	8113	3404	89.83	96.5	91.23	560.8	291.26	92.52	426.03	2.2031	4.53e-14	1.58e-12	Up	Full=Expansin-A8; Short=AtEXPA8; AltName: Full=Alpha-expansin-8; Short=At-EXP8; Short=AtEx8; AltName: Full=Ath-ExpAlpha-1.11; Flags: Precursor [Arabidopsis thaliana]
845	Bni03T004628	27	15	17	6	3139	1.98	1.08	1.28	0.41	268.58	1.44667	134.495	6.5387	0.00119049	0.00509798	Up	Full=Expansin-B15; AltName: Full=Beta-expansin-15; AltName: Full=OsEXPB15; AltName: Full=OsaEXPb1.16; Flags: Precursor [Oryza sativa Japonica Group]
1664	Bni06T008724	577	485	332	420	1884	42.34	34.9	25.07	29.03	161.2	34.1033	95.115	1.4798	0.0168608	0.0472091	Up	Full=Expansin-like A2; Short=At-EXPL2; Short=AtEXLA2; Short=AtEXPL2; AltName: Full=Ath-ExpBeta-2.2; Flags: Precursor [Arabidopsis thaliana]
3074	Bni12T016493	1432	1203	1015	493	396	105.09	86.57	76.65	34.08	33.88	89.4367	33.98	-1.3962	1.4e-10	2.82e-09	Down	Full=Exportin-7-B [Xenopus laevis]
1320	Bni05T006943	560	444	359	107	75	41.1	31.95	27.11	7.4	6.42	33.3867	6.91	-2.2725	2.38e-14	8.58e-13	Down	Full=External alternative NAD(P)H-ubiquinone oxidoreductase B2, mitochondrial; AltName: Full=External alternative NADH dehydrogenase NDB2; AltName: Full=NADH:ubiquinone reductase (non-electrogenic) NDB2; Flags: Precursor [Arabidopsis thaliana]
676	Bni03T003787	197	287	283	48	29	14.46	20.65	21.37	3.32	2.48	18.8267	2.9	-2.6987	8.72e-15	3.34e-13	Down	Full=Factor of DNA methylation 1; AltName: Full=Protein IDN2 PARALOG 1; AltName: Full=Protein IDN2-LIKE 1 [Arabidopsis thaliana]
530	Bni02T002927	539	648	676	1539	932	39.56	46.63	51.05	106.38	79.74	45.7467	93.06	1.0245	1.49e-06	1.41e-05	Up	Full=Factor of DNA methylation 4 [Arabidopsis thaliana]
784	Bni03T004359	192	207	225	84	84	14.09	14.9	16.99	5.81	7.19	15.3267	6.5	-1.2375	6.56e-06	5.34e-05	Down	Full=Factor of DNA methylation 5 [Arabidopsis thaliana]
1656	Bni06T008681	37	30	37	115	57	2.72	2.16	2.79	7.95	4.88	2.55667	6.415	1.3272	0.00285137	0.0107256	Up	Full=FAD-dependent urate hydroxylase [Klebsiella oxytoca]
102	Bni01T000728	164	147	147	447	186	12.04	10.58	11.1	30.9	15.91	11.24	23.405	1.0582	0.00284786	0.0107147	Up	Full=Family of serine hydrolases 3 [Saccharomyces cerevisiae S288C]
1465	Bni05T007621	0	2	0	32	11	0	0.14	0	2.21	0.94	0.0466667	1.575	5.0768	0.00201872	0.00797377	Up	Full=Farnesyl pyrophosphate synthase; Short=FPP synthase; Short=PgFPS; AltName: Full=(2E,6E)-farnesyl diphosphate synthase; AltName: Full=Dimethylallyltranstransferase; AltName: Full=Farnesyl diphosphate synthase; AltName: Full=Geranyltranstransferase [Panax ginseng]
3440	Bni13T018317	11	5	4	0	0	0.81	0.36	0.3	0	0	0.49	0.001	-8.9366	0.0155661	0.0442372	Down	Full=Farnesyl pyrophosphate synthase; Short=FPP synthase; Short=PgFPS; AltName: Full=(2E,6E)-farnesyl diphosphate synthase; AltName: Full=Dimethylallyltranstransferase; AltName: Full=Farnesyl diphosphate synthase; AltName: Full=Geranyltranstransferase [Panax ginseng]
72	Bni01T000530	40	19	5	3	0	2.94	1.37	0.38	0.21	0	1.56333	0.105	-3.8962	0.00989986	0.0304893	Down	Full=Fasciclin-like arabinogalactan protein 10; Flags: Precursor [Arabidopsis thaliana]
3224	Bni12T017259	62	72	47	48	1695	4.55	5.18	3.55	3.32	145.03	4.42667	74.175	4.0666	0.00599466	0.0202277	Up	Full=Fasciclin-like arabinogalactan protein 11; Flags: Precursor [Arabidopsis thaliana]
558	Bni02T003067	43	78	49	38	19156	3.16	5.61	3.7	2.63	1639.04	4.15667	820.835	7.6255	0.000132791	0.000764058	Up	Full=Fasciclin-like arabinogalactan protein 12; Flags: Precursor [Arabidopsis thaliana]
1127	Bni04T006005	269	226	117	26	8	19.74	16.26	8.84	1.8	0.68	14.9467	1.24	-3.5914	5.49e-10	1.01e-08	Down	Full=Fasciclin-like arabinogalactan protein 21; Flags: Precursor [Arabidopsis thaliana]
968	Bni04T005286	595	594	521	1415	2312	43.67	42.74	39.35	97.81	197.82	41.92	147.815	1.8181	2.97e-08	4.05e-07	Up	Full=Fatty acid hydroperoxide lyase, chloroplastic; Short=LeHPL; AltName: Full=Cytochrome P450 74B [Solanum lycopersicum]
381	Bni02T002121	286	292	208	779	330	20.99	21.01	15.71	53.85	28.24	19.2367	41.045	1.0933	0.00171515	0.00695114	Up	Full=Fatty acyl-CoA reductase 1 [Arabidopsis thaliana]
2912	Bni11T015521	18	37	34	117	46	1.32	2.66	2.57	8.09	3.94	2.18333	6.015	1.462	0.0110932	0.0335045	Up	Full=Fatty acyl-CoA reductase 1 [Arabidopsis thaliana]
3155	Bni12T016906	23022	17868	11778	25	15	1689.52	1285.78	889.48	1.73	1.28	1288.26	1.505	-9.7414	1.95e-138	1.69e-134	Down	Full=Fatty acyl-CoA reductase 2, chloroplastic; Short=AtFAR2; AltName: Full=Fatty acid reductase 2; AltName: Full=Male sterility protein 2; Flags: Precursor [Arabidopsis thaliana]
383	Bni02T002123	1588	1492	1213	6940	2530	116.54	107.36	91.61	479.72	216.47	105.17	348.095	1.7268	6.31e-07	6.56e-06	Up	Full=Fatty acyl-CoA reductase 3; AltName: Full=Protein ECERIFERUM 4 [Arabidopsis thaliana]
1223	Bni04T006440	55	69	95	16	6	4.04	4.97	7.17	1.11	0.51	5.39333	0.81	-2.7352	5.6e-06	4.63e-05	Down	Full=Fatty-acid-binding protein 1; Short=AtFAP1; AltName: Full=Chalcone-flavanone isomerase family protein 1 [Arabidopsis thaliana]
215	Bni01T001229	2366	1731	1100	700	518	173.63	124.56	83.07	48.39	44.32	127.087	46.355	-1.455	1.95e-05	0.000140707	Down	Full=Fatty-acid-binding protein 2; Short=AtFAP2; AltName: Full=Chalcone-flavanone isomerase family protein 2 [Arabidopsis thaliana]
755	Bni03T004231	69	67	77	12	21	5.06	4.82	5.82	0.83	1.8	5.23333	1.315	-1.9927	0.000125072	0.000724958	Down	Full=FBD-associated F-box protein At4g10400 [Arabidopsis thaliana]
2485	Bni09T013243	413	560	619	201	102	30.31	40.3	46.75	13.89	8.73	39.12	11.31	-1.7903	1.93e-08	2.74e-07	Down	Full=F-box only protein 6 [Arabidopsis thaliana]
74	Bni01T000548	51	30	25	30	308	3.74	2.16	1.89	2.07	26.35	2.59667	14.21	2.4522	0.00796313	0.0255	Up	Full=F-box protein AFR; AltName: Full=Protein ATTENUATED FAR-RED RESPONSE; AltName: Full=SKP1-interacting partner 29 [Arabidopsis thaliana]
1318	Bni05T006941	47	27	35	86	63	3.45	1.94	2.64	5.94	5.39	2.67667	5.665	1.0816	0.0162683	0.0458556	Up	Full=F-box protein At1g61340 [Arabidopsis thaliana]
2811	Bni10T014855	2264	1838	1279	607	349	166.15	132.26	96.59	41.96	29.86	131.667	35.91	-1.8744	1.01e-09	1.79e-08	Down	Full=F-box protein At1g67340 [Arabidopsis thaliana]
2519	Bni09T013434	15	37	63	4	2	1.1	2.66	4.76	0.28	0.17	2.84	0.225	-3.6579	0.000306749	0.0015773	Down	Full=F-box protein At2g14710 [Arabidopsis thaliana]
719	Bni03T004058	242	173	157	66	39	17.76	12.45	11.86	4.56	3.34	14.0233	3.95	-1.8279	8.81e-07	8.78e-06	Down	Full=F-box protein At2g17690; AltName: Full=Protein SUPPRESSOR OF DRM1 DRM2 CMT3 [Arabidopsis thaliana]
394	Bni02T002187	105	123	83	150	537	7.71	8.85	6.27	10.37	45.95	7.61	28.16	1.8877	0.00177544	0.00714185	Up	Full=F-box protein At2g27310 [Arabidopsis thaliana]
999	Bni04T005416	65	71	61	148	136	4.77	5.11	4.61	10.23	11.64	4.83	10.935	1.1789	7.38e-05	0.00045755	Up	Full=F-box protein At3g07870 [Arabidopsis thaliana]
449	Bni02T002541	43	41	26	174	85	3.16	2.95	1.96	12.03	7.27	2.69	9.65	1.8429	4.67e-05	0.000303961	Up	Full=F-box protein At3g22350 [Arabidopsis thaliana]
431	Bni02T002434	22	44	35	132	283	1.61	3.17	2.64	9.12	24.21	2.47333	16.665	2.7523	9.77e-07	9.64e-06	Up	Full=F-box protein At4g18380 [Arabidopsis thaliana]
3581	Bni14T019110	473	556	574	368	132	34.71	40.01	43.35	25.44	11.29	39.3567	18.365	-1.0996	0.00336463	0.0123733	Down	Full=F-box protein At4g35930 [Arabidopsis thaliana]
1484	Bni05T007680	3015	2964	2645	695	745	221.26	213.29	199.75	48.04	63.74	211.433	55.89	-1.9195	1.09e-22	9.62e-21	Down	Full=F-box protein CPR1; AltName: Full=Protein CONSTITUTIVE EXPRESSER OF PR GENES 1; AltName: Full=Protein CONSTITUTIVE EXPRESSER OF PR GENES 30 [Arabidopsis thaliana]
264	Bni01T001437	781	773	723	2031	1672	57.32	55.63	54.6	140.39	143.06	55.85	141.725	1.3435	8.97e-25	9.39e-23	Up	Full=F-box protein GID2; AltName: Full=Protein SLEEPY 1 [Arabidopsis thaliana]
872	Bni03T004753	116	99	86	203	233	8.51	7.12	6.49	14.03	19.94	7.37333	16.985	1.2039	0.000178964	0.000992692	Up	Full=F-box protein PP2-A12; AltName: Full=Protein PHLOEM PROTEIN 2-LIKE A12; Short=AtPP2-A12 [Arabidopsis thaliana]
3197	Bni12T017136	1098	1063	650	437	295	80.58	76.49	49.09	30.21	25.24	68.72	27.725	-1.3095	8.54e-06	6.76e-05	Down	Full=F-box protein PP2-A15; AltName: Full=Protein PHLOEM PROTEIN 2-LIKE A15; Short=AtPP2-A15 [Arabidopsis thaliana]
2919	Bni11T015556	43	35	43	71	105	3.16	2.52	3.25	4.91	8.98	2.97667	6.945	1.2223	0.00843893	0.0267705	Up	Full=F-box protein PP2-B11; AltName: Full=Protein PHLOEM PROTEIN 2-LIKE B11; Short=AtPP2-B11; AltName: Full=SKP1-interacting partner 12 [Arabidopsis thaliana]
453	Bni02T002552	24	23	30	4	8	1.76	1.66	2.27	0.28	0.68	1.89667	0.48	-1.9824	0.0105958	0.032279	Down	Full=F-box protein PP2-B13; AltName: Full=Protein PHLOEM PROTEIN 2-LIKE B13; Short=AtPP2-B13 [Arabidopsis thaliana]
1236	Bni04T006496	1262	973	622	283	245	92.61	70.02	46.97	19.56	20.96	69.8667	20.26	-1.786	1.15e-07	1.38e-06	Down	Full=F-box protein SKIP14; AltName: Full=SKP1-interacting partner 14 [Arabidopsis thaliana]
1503	Bni05T007833	2132	1851	1426	833	658	156.46	133.2	107.69	57.58	56.3	132.45	56.94	-1.2179	7.74e-08	9.66e-07	Down	Full=F-box protein SKIP19; AltName: Full=F-box/LRR-repeat protein 20; AltName: Full=SKP1-interacting partner 19 [Arabidopsis thaliana]
2420	Bni09T012919	37	27	30	84	65	2.72	1.94	2.27	5.81	5.56	2.31	5.685	1.2993	0.00174321	0.00703757	Up	Full=F-box protein SKIP28; AltName: Full=Protein MATERNAL EFFECT EMBRYO ARREST 11; AltName: Full=SKP1-interacting partner 28 [Arabidopsis thaliana]
986	Bni04T005378	7	8	16	76	25	0.51	0.58	1.21	5.25	2.14	0.766667	3.695	2.2689	0.0029112	0.0109149	Up	Full=F-box protein SNE; AltName: Full=Protein SNEEZY; AltName: Full=Sleepy protein 2 [Arabidopsis thaliana]
1751	Bni06T009241	132	90	66	257	572	9.69	6.48	4.98	17.76	48.94	7.05	33.35	2.242	1.88e-05	0.000136596	Up	Full=F-box protein SNE; AltName: Full=Protein SNEEZY; AltName: Full=Sleepy protein 2 [Arabidopsis thaliana]
1156	Bni04T006120	225	184	164	21	70	16.51	13.24	12.39	1.45	5.99	14.0467	3.72	-1.9169	0.0013712	0.0057362	Down	Full=F-box/FBD/LRR-repeat protein At1g13570 [Arabidopsis thaliana]
2768	Bni10T014651	8	11	12	182	144	0.59	0.79	0.91	12.58	12.32	0.763333	12.45	4.0277	2.85e-20	2.06e-18	Up	Full=F-box/FBD/LRR-repeat protein At1g13570 [Arabidopsis thaliana]
3352	Bni13T017948	3	11	5	176	170	0.22	0.79	0.38	12.17	14.55	0.463333	13.36	4.8497	1.45e-17	7.75e-16	Up	Full=F-box/kelch-repeat protein At1g55270 [Arabidopsis thaliana]
3158	Bni12T016910	84	80	71	83	437	6.16	5.76	5.36	5.74	37.39	5.76	21.565	1.9046	0.00678068	0.0223261	Up	Full=F-box/kelch-repeat protein At1g80440 [Arabidopsis thaliana]
2910	Bni11T015515	77	59	36	0	1	5.65	4.25	2.72	0	0.09	4.20667	0.045	-6.5466	9.51e-06	7.46e-05	Down	Full=F-box/kelch-repeat protein At3g16580 [Arabidopsis thaliana]
249	Bni01T001391	25	27	13	35	153	1.83	1.94	0.98	2.42	13.09	1.58333	7.755	2.2922	0.0045342	0.0159885	Up	Full=F-box/kelch-repeat protein At5g43190 [Arabidopsis thaliana]
2334	Bni08T012350	598	522	370	250	186	43.89	37.56	27.94	17.28	15.91	36.4633	16.595	-1.1357	6.16e-05	0.000389694	Down	Full=F-box/kelch-repeat protein SKIP4; AltName: Full=SKP1-interacting partner 4 [Arabidopsis thaliana]
1317	Bni05T006940	25	21	6	1	1	1.83	1.51	0.45	0.07	0.09	1.26333	0.08	-3.9811	0.00454075	0.0160066	Down	Full=F-box/LRR-repeat protein 25 [Arabidopsis thaliana]
1428	Bni05T007432	21	20	14	2	0	1.54	1.44	1.06	0.14	0	1.34667	0.07	-4.2659	0.00171587	0.00695241	Down	Full=F-box/LRR-repeat protein 25 [Arabidopsis thaliana]
1934	Bni07T010135	129	113	106	213	256	9.47	8.13	8.01	14.72	21.9	8.53667	18.31	1.1009	0.000405933	0.0020085	Up	Full=F-box/LRR-repeat protein 3 [Arabidopsis thaliana]
1419	Bni05T007390	199	135	37	5	2	14.6	9.71	2.79	0.35	0.17	9.03333	0.26	-5.1187	3.54e-08	4.73e-07	Down	Full=F-box/LRR-repeat protein At1g55660 [Arabidopsis thaliana]
732	Bni03T004099	138	111	121	320	292	10.13	7.99	9.14	22.12	24.98	9.08667	23.55	1.3739	3.55e-08	4.74e-07	Up	Full=F-box/WD-40 repeat-containing protein 1; AltName: Full=WD-40-associated F-box protein 1 [Arabidopsis thaliana]
20	Bni01T000165	686	576	754	1754	1416	50.34	41.45	56.94	121.24	121.16	49.5767	121.2	1.2897	2.94e-11	6.73e-10	Up	Full=FCS-Like Zinc finger 1 [Arabidopsis thaliana]
168	Bni01T000993	2088	2136	1917	5549	4373	153.23	153.71	144.77	383.57	374.17	150.57	378.87	1.3313	7.97e-30	1.25e-27	Up	Full=FCS-Like Zinc finger 15 [Arabidopsis thaliana]
1742	Bni06T009203	1348	1179	1141	3472	3276	98.93	84.84	86.17	240	280.3	89.98	260.15	1.5317	6.04e-19	3.82e-17	Up	Full=FCS-Like Zinc finger 17 [Arabidopsis thaliana] >P0DO12.1 RecName: Full=FCS-Like Zinc finger 18 [Arabidopsis thaliana]
2974	Bni11T015848	164	204	194	341	580	12.04	14.68	14.65	23.57	49.63	13.79	36.6	1.4082	0.000181377	0.00100511	Up	Full=FCS-Like Zinc finger 6 [Arabidopsis thaliana]
2495	Bni09T013322	516	242	84	48	37	37.87	17.41	6.34	3.32	3.17	20.54	3.245	-2.6621	0.000142638	0.00081367	Down	Full=Fe(2+) transport protein 2; AltName: Full=Fe(II) transport protein 2; AltName: Full=Iron-regulated transporter 2; Short=OsIRT2; Flags: Precursor [Oryza sativa Japonica Group]
2978	Bni11T015867	78	68	62	259	309	5.72	4.89	4.68	17.9	26.44	5.09667	22.17	2.121	7.26e-11	1.56e-09	Up	Full=Ferredoxin C 1, chloroplastic; Short=AtFdC1; Flags: Precursor [Arabidopsis thaliana]
2883	Bni11T015339	1	0	4	14	21	0.07	0	0.3	0.97	1.8	0.123333	1.385	3.4893	0.0132538	0.0387891	Up	Full=Ferric reduction oxidase 6; Short=AtFRO6; AltName: Full=Ferric-chelate reductase 6 [Arabidopsis thaliana]
807	Bni03T004482	258	188	200	21	26	18.93	13.53	15.1	1.45	2.22	15.8533	1.835	-3.1109	7.95e-16	3.53e-14	Down	Full=Ferritin-3, chloroplastic; AltName: Full=SFerH-3; Flags: Precursor [Glycine max]
1941	Bni07T010178	18	23	25	108	103	1.32	1.66	1.89	7.47	8.81	1.62333	8.14	2.3261	2.38e-08	3.32e-07	Up	Full=Ferritin-4, chloroplastic; Flags: Precursor [Arabidopsis thaliana]
3398	Bni13T018126	78	90	88	35	28	5.72	6.48	6.65	2.42	2.4	6.28333	2.41	-1.3825	0.000213646	0.00115539	Down	Full=FHA domain-containing protein DDL; AltName: Full=Protein DAWDLE [Arabidopsis thaliana]
40	Bni01T000329	2859	2172	1777	426	175	209.81	156.3	134.2	29.45	14.97	166.77	22.21	-2.9086	1.3e-16	6.4e-15	Down	Full=FHA domain-containing protein PS1; AltName: Full=Protein PARALLEL SPINDLE 1; Short=AtPS1 [Arabidopsis thaliana]
3483	Bni14T018641	442	473	388	719	1605	32.44	34.04	29.3	49.7	137.33	31.9267	93.515	1.5504	0.000248358	0.0013139	Up	Full=Filament-like plant protein; Short=LeFPP [Solanum lycopersicum]
1002	Bni04T005430	847	708	701	185	251	62.16	50.95	52.94	12.79	21.48	55.35	17.135	-1.6916	1.16e-08	1.71e-07	Down	Full=Fimbrin-5; Short=AtFIM5; AltName: Full=Fimbrin-like protein 2; AltName: Full=Fimbrin5 [Arabidopsis thaliana]
3095	Bni12T016610	263	246	226	1039	374	19.3	17.7	17.07	71.82	32	18.0233	51.91	1.5261	4.12e-05	0.000272468	Up	Full=Flavonoid 3',5'-hydroxylase 1; Short=F3'5'H; AltName: Full=CYPLXXVA1; AltName: Full=Cytochrome P450 75A1 [Petunia x hybrida]
417	Bni02T002383	163	99	33	1534	640	11.96	7.12	2.49	106.04	54.76	7.19	80.4	3.4831	8.57e-09	1.3e-07	Up	Full=Flavonoid 3',5'-hydroxylase 2; Short=F3'5'H; AltName: Full=CYPLXXVA3; AltName: Full=Cytochrome P450 75A3 [Petunia x hybrida]
2599	Bni09T013823	6	6	10	23	46	0.44	0.43	0.76	1.59	3.94	0.543333	2.765	2.3474	0.00344429	0.0126232	Up	Full=Flavonoid 3',5'-methyltransferase; AltName: Full=Anthocyanin-O-methyltransferase; Short=VvAOMT [Vitis vinifera]
3276	Bni13T017605	549	614	563	64	11	40.29	44.18	42.52	4.42	0.94	42.33	2.68	-3.9814	5.07e-14	1.76e-12	Down	Full=Flavonol 3-O-glucosyltransferase F3GT2; AltName: Full=Flavonoid 3-O-glycosyltransferase 2 [Actinidia chinensis var. chinensis]
3610	BniUnT019312	261	219	214	1205	571	19.15	15.76	16.16	83.29	48.86	17.0233	66.075	1.9566	4.87e-11	1.08e-09	Up	Full=Flavonol 3-O-glucosyltransferase F3GT2; AltName: Full=Flavonoid 3-O-glycosyltransferase 2 [Actinidia chinensis var. chinensis]
940	Bni03T005083	629	619	508	295	103	46.16	44.54	38.36	20.39	8.81	43.02	14.6	-1.559	4.23e-05	0.000278657	Down	Full=Flavonol synthase/flavanone 3-hydroxylase; AltName: Full=CitFLS; Short=FLS [Citrus unshiu]
941	Bni03T005084	126	141	191	833	339	9.25	10.15	14.42	57.58	29.01	11.2733	43.295	1.9413	3.69e-07	4.02e-06	Up	Full=Flavonol synthase/flavanone 3-hydroxylase; AltName: Full=CitFLS; Short=FLS [Citrus unshiu]
1077	Bni04T005817	651	608	580	3041	1135	47.78	43.75	43.8	210.21	97.11	45.11	153.66	1.7682	1.63e-07	1.91e-06	Up	Full=Floral homeotic protein AGAMOUS; AltName: Full=NAG1 [Nicotiana tabacum]
321	Bni01T001709	3652	3236	2831	1028	524	268.01	232.86	213.8	71.06	44.83	238.223	57.945	-2.0396	1.05e-15	4.55e-14	Down	Full=Floral homeotic protein APETALA 3 [Arabidopsis thaliana]
3022	Bni11T016163	5252	5105	4791	611	672	385.43	367.36	361.82	42.23	57.5	371.537	49.865	-2.8974	7.57e-50	2.84e-47	Down	Full=Flowering time control protein FCA [Arabidopsis thaliana]
1346	Bni05T007054	1288	1433	1570	541	523	94.52	103.12	118.57	37.4	44.75	105.403	41.075	-1.3596	1.2e-12	3.4e-11	Down	Full=Formin-like protein 14; Short=AtFH14 [Arabidopsis thaliana]
2548	Bni09T013588	133	128	128	16	11	9.76	9.21	9.67	1.11	0.94	9.54667	1.025	-3.2194	3.93e-15	1.59e-13	Down	Full=Formin-like protein 8; Short=AtFH8; Short=AtFORMIN-1; Flags: Precursor [Arabidopsis thaliana]
2030	Bni07T010631	135	105	101	54	29	9.91	7.56	7.63	3.73	2.48	8.36667	3.105	-1.4301	0.00030291	0.0015623	Down	Full=Formyltetrahydrofolate deformylase 2, mitochondrial; Flags: Precursor [Arabidopsis thaliana]
3161	Bni12T016947	1239	1128	1096	587	409	90.93	81.17	82.77	40.58	35	84.9567	37.79	-1.1687	4.57e-12	1.2e-10	Down	Full=Fra a 1-associated protein; Short=FaAP [Fragaria x ananassa]
1129	Bni04T006008	152	123	114	66	36	11.15	8.85	8.61	4.56	3.08	9.53667	3.82	-1.3199	0.00037583	0.00188111	Down	Full=Frataxin, mitochondrial; Short=Fxn; Flags: Precursor [Arabidopsis thaliana]
3137	Bni12T016836	19	36	39	67	97	1.39	2.59	2.95	4.63	8.3	2.31	6.465	1.4848	0.00668799	0.0220841	Up	Full=FT-interacting protein 1 [Arabidopsis thaliana]
128	Bni01T000869	19	9	19	145	141	1.39	0.65	1.43	10.02	12.06	1.15667	11.04	3.2547	2.07e-11	4.87e-10	Up	Full=FT-interacting protein 7; Short=OsFTIP7 [Oryza sativa Japonica Group]
413	Bni02T002344	1443	1408	1106	662	287	105.9	101.32	83.53	45.76	24.56	96.9167	35.16	-1.4628	2.4e-06	2.16e-05	Down	Full=G2/mitotic-specific cyclin S13-7; AltName: Full=B-like cyclin [Glycine max]
374	Bni02T002068	138	111	46	689	1028	10.13	7.99	3.47	47.63	87.96	7.19667	67.795	3.2358	8.14e-11	1.73e-09	Up	Full=GABA transporter 1; Short=AtGAT1; AltName: Full=Bidirectional amino acid transporter 1 [Arabidopsis thaliana]
2712	Bni10T014420	48	58	51	330	133	3.52	4.17	3.85	22.81	11.38	3.84667	17.095	2.1519	1.95e-07	2.26e-06	Up	Full=Galactinol--sucrose galactosyltransferase; AltName: Full=Raffinose synthase [Pisum sativum]
993	Bni04T005404	581	548	506	127	67	42.64	39.43	38.21	8.78	5.73	40.0933	7.255	-2.4663	3.02e-21	2.38e-19	Down	Full=Galacturonokinase; AltName: Full=D-galacturonic acid-1-P kinase [Arabidopsis thaliana]
3292	Bni13T017684	6	20	8	0	1	0.44	1.44	0.6	0	0.09	0.826667	0.045	-4.1993	0.0160809	0.0454385	Down	Full=Gamma-glutamyl peptidase 5 [Arabidopsis thaliana]
1864	Bni06T009721	373	334	282	764	616	27.37	24.03	21.3	52.81	52.71	24.2333	52.76	1.1225	3.08e-08	4.18e-07	Up	Full=GATA transcription factor 2; Short=AtGATA-2 [Arabidopsis thaliana]
111	Bni01T000785	94	128	123	63	39	6.9	9.21	9.29	4.35	3.34	8.46667	3.845	-1.1388	0.00163521	0.00667098	Down	Full=GATA transcription factor 28; AltName: Full=Protein TIFY 2A; AltName: Full=ZIM-like 2 protein [Arabidopsis thaliana]
1453	Bni05T007569	186	158	87	247	456	13.65	11.37	6.57	17.07	39.02	10.53	28.045	1.4132	0.00389557	0.0140476	Up	Full=GDSL esterase/lipase 1; AltName: Full=Extracellular lipase 1; Flags: Precursor [Arabidopsis thaliana]
2238	Bni08T011827	28	28	28	0	3	2.05	2.01	2.11	0	0.26	2.05667	0.13	-3.9837	0.000208409	0.00113025	Down	Full=GDSL esterase/lipase 1; AltName: Full=Extracellular lipase 1; Flags: Precursor [Arabidopsis thaliana]
2403	Bni09T012777	51	31	41	0	0	3.74	2.23	3.1	0	0	3.02333	0.001	-11.5619	9.66e-07	9.54e-06	Down	Full=GDSL esterase/lipase 6; AltName: Full=Extracellular lipase 6; Flags: Precursor [Arabidopsis thaliana]
1421	Bni05T007394	9424	6811	3803	399	165	691.6	490.12	287.2	27.58	14.12	489.64	20.85	-4.5536	4.86e-26	5.64e-24	Down	Full=GDSL esterase/lipase APG; AltName: Full=Extracellular lipase APG; Flags: Precursor [Arabidopsis thaliana]
1605	Bni06T008375	155	67	22	1	0	11.38	4.82	1.66	0.07	0	5.95333	0.035	-7.4102	1.24e-05	9.41e-05	Down	Full=GDSL esterase/lipase At1g09390; AltName: Full=Extracellular lipase At1g09390; Flags: Precursor [Arabidopsis thaliana]
404	Bni02T002264	515	392	154	3	5	37.79	28.21	11.63	0.21	0.43	25.8767	0.32	-6.3374	1.43e-17	7.67e-16	Down	Full=GDSL esterase/lipase At1g71250; AltName: Full=Extracellular lipase At1g71250; Flags: Precursor [Arabidopsis thaliana]
781	Bni03T004346	120	138	125	421	326	8.81	9.93	9.44	29.1	27.89	9.39333	28.495	1.601	2.17e-14	7.88e-13	Up	Full=GDSL esterase/lipase At1g71250; AltName: Full=Extracellular lipase At1g71250; Flags: Precursor [Arabidopsis thaliana]
185	Bni01T001067	880	1031	1321	5455	2017	64.58	74.19	99.76	377.07	172.58	79.51	274.825	1.7893	7.96e-07	8.02e-06	Up	Full=GDSL esterase/lipase At1g71691; AltName: Full=Extracellular lipase At1g71691; Flags: Precursor [Arabidopsis thaliana]
1997	Bni07T010513	936	676	219	0	0	68.69	48.65	16.54	0	0	44.6267	0.001	-15.4456	1.12e-13	3.68e-12	Down	Full=GDSL esterase/lipase At1g71691; AltName: Full=Extracellular lipase At1g71691; Flags: Precursor [Arabidopsis thaliana]
823	Bni03T004537	161	155	117	0	0	11.82	11.15	8.84	0	0	10.6033	0.001	-13.3722	1.45e-10	2.93e-09	Down	Full=GDSL esterase/lipase At2g40250; AltName: Full=Extracellular lipase At2g40250; Flags: Precursor [Arabidopsis thaliana]
1086	Bni04T005859	127	104	120	676	269	9.32	7.48	9.06	46.73	23.02	8.62	34.875	2.0164	6.46e-08	8.22e-07	Up	Full=GDSL esterase/lipase At2g42990; AltName: Full=Extracellular lipase At2g42990; Flags: Precursor [Arabidopsis thaliana]
1209	Bni04T006382	273	232	191	142	56	20.03	16.69	14.42	9.82	4.79	17.0467	7.305	-1.2225	0.00232868	0.00900049	Down	Full=GDSL esterase/lipase At3g27950; AltName: Full=Extracellular lipase At3g27950; Flags: Precursor [Arabidopsis thaliana]
2590	Bni09T013765	2892	1718	1	10	8	212.24	123.63	0.08	0.69	0.68	111.983	0.685	-7.353	0.00111268	0.00481	Down	Full=GDSL esterase/lipase At3g48460; AltName: Full=Extracellular lipase At3g48460; Flags: Precursor [Arabidopsis thaliana]
743	Bni03T004163	72	135	146	345	621	5.28	9.71	11.03	23.85	53.13	8.67333	38.49	2.1498	4.94e-06	4.14e-05	Up	Full=GDSL esterase/lipase At5g03610; AltName: Full=Extracellular lipase At5g03610; Flags: Precursor [Arabidopsis thaliana]
368	Bni02T002041	10940	7213	2015	0	0	802.86	519.05	152.17	0	0	491.36	0.001	-18.9064	9.7e-17	4.84e-15	Down	Full=GDSL esterase/lipase At5g03810; AltName: Full=Extracellular lipase At5g03810; Flags: Precursor [Arabidopsis thaliana]
2204	Bni08T011639	9969	6271	2175	5	1	731.6	451.26	164.26	0.35	0.09	449.04	0.22	-10.9951	2.81e-24	2.78e-22	Down	Full=GDSL esterase/lipase At5g03810; AltName: Full=Extracellular lipase At5g03810; Flags: Precursor [Arabidopsis thaliana]
2014	Bni07T010588	553	493	481	0	0	40.58	35.48	36.33	0	0	37.4633	0.001	-15.1932	7e-15	2.74e-13	Down	Full=GDSL esterase/lipase At5g41890 [Arabidopsis thaliana]
754	Bni03T004227	6	7	12	88	179	0.44	0.5	0.91	6.08	15.32	0.616667	10.7	4.117	4.63e-10	8.69e-09	Up	Full=GDSL esterase/lipase At5g45910; AltName: Full=Extracellular lipase At5g45910; Flags: Precursor [Arabidopsis thaliana]
1266	Bni05T006705	198	203	214	411	387	14.53	14.61	16.16	28.41	33.11	15.1	30.76	1.0265	6.98e-07	7.13e-06	Up	Full=GDSL esterase/lipase At5g45910; AltName: Full=Extracellular lipase At5g45910; Flags: Precursor [Arabidopsis thaliana]
1276	Bni05T006752	2	6	4	275	107	0.15	0.43	0.3	19.01	9.16	0.293333	14.085	5.5855	1.18e-16	5.85e-15	Up	Full=GDSL esterase/lipase At5g45960; AltName: Full=Extracellular lipase At5g45960; Flags: Precursor [Arabidopsis thaliana]
3408	Bni13T018170	180	216	183	1547	564	13.21	15.54	13.82	106.93	48.26	14.19	77.595	2.4511	2.12e-11	4.96e-10	Up	Full=GDSL esterase/lipase At5g55050; AltName: Full=Extracellular lipase At5g55050; Flags: Precursor [Arabidopsis thaliana]
3587	Bni14T019144	190	104	1	2	0	13.94	7.48	0.08	0.14	0	7.16667	0.07	-6.6778	0.00555486	0.0190149	Down	Full=GDSL esterase/lipase At5g55050; AltName: Full=Extracellular lipase At5g55050; Flags: Precursor [Arabidopsis thaliana]
1967	Bni07T010351	3	1	6	29	14	0.22	0.07	0.45	2	1.2	0.246667	1.6	2.6974	0.0113888	0.0342417	Up	Full=GDSL esterase/lipase CPRD49; AltName: Full=Extracellular lipase CPRD49; Flags: Precursor [Arabidopsis thaliana]
344	Bni01T001799	832	806	703	3516	2599	61.06	58	53.09	243.04	222.38	57.3833	232.71	2.0198	3.48e-41	9.86e-39	Up	Full=GDSL esterase/lipase EXL3; AltName: Full=Family II extracellular lipase 3; Short=Family II lipase EXL3; Flags: Precursor [Arabidopsis thaliana]
3579	Bni14T019107	689	635	541	162	205	50.56	45.69	40.86	11.2	17.54	45.7033	14.37	-1.6692	3.86e-09	6.2e-08	Down	Full=GDSL esterase/lipase EXL3; AltName: Full=Family II extracellular lipase 3; Short=Family II lipase EXL3; Flags: Precursor [Arabidopsis thaliana]
706	Bni03T003959	50	31	7	2	1	3.67	2.23	0.53	0.14	0.09	2.14333	0.115	-4.2202	0.00113551	0.00489484	Down	Full=General transcription factor IIF subunit 2; AltName: Full=ATP-dependent helicase TfIIF-beta; AltName: Full=Transcription initiation factor IIF subunit beta; Short=TFIIF-beta [Drosophila melanogaster]
2658	Bni10T014187	1271	1518	1474	3343	2292	93.28	109.24	111.32	231.08	196.11	104.613	213.595	1.0298	1.15e-10	2.36e-09	Up	Full=Geranylgeranyl diphosphate reductase, chloroplastic; AltName: Full=Geranylgeranyl reductase; Flags: Precursor [Nicotiana tabacum]
3405	Bni13T018161	90	102	117	317	572	6.6	7.34	8.84	21.91	48.94	7.59333	35.425	2.222	7.24e-08	9.13e-07	Up	Full=Geranylgeranyl pyrophosphate synthase, chloroplastic; Short=GGPP synthase; Short=GGPS; AltName: Full=(2E,6E)-farnesyl diphosphate synthase; AltName: Full=Dimethylallyltranstransferase; AltName: Full=Farnesyl diphosphate synthase; AltName: Full=Farnesyltranstransferase; AltName: Full=Geranyltranstransferase; Flags: Precursor [Hevea brasiliensis]
606	Bni02T003352	64	66	41	6	5	4.7	4.75	3.1	0.41	0.43	4.18333	0.42	-3.3162	4.66e-07	4.97e-06	Down	Full=Germin-like protein subfamily 1 member 14; Flags: Precursor [Arabidopsis thaliana]
43	Bni01T000360	138	103	49	221	616	10.13	7.41	3.7	15.28	52.71	7.08	33.995	2.2635	0.000285377	0.00148339	Up	Full=Gibberellin 20 oxidase 2; AltName: Full=GA 20-oxidase 2; AltName: Full=Gibberellin C-20 oxidase 2; AltName: Full=Os20ox2; AltName: Full=Protein semidwarf-1 [Oryza sativa Indica Group] >Q0JH50.1 RecName: Full=Gibberellin 20 oxidase 2; Short=OsGA20ox2; AltName: Full=GA 20-oxidase 2; AltName: Full=Gibberellin C-20 oxidase 2; AltName: Full=Os20ox2; AltName: Full=Protein semidwarf-1 [Oryza sativa…
2333	Bni08T012345	10	8	11	34	91	0.73	0.58	0.83	2.35	7.79	0.713333	5.07	2.8293	0.000170881	0.000950299	Up	Full=Gibberellin 20-oxidase-like protein [Arabidopsis thaliana]
2353	Bni08T012434	130	131	91	400	490	9.54	9.43	6.87	27.65	41.93	8.61333	34.79	2.014	4.63e-10	8.69e-09	Up	Full=Gibberellin 2-beta-dioxygenase 1; AltName: Full=GA 2-oxidase 1; AltName: Full=Gibberellin 2-beta-hydroxylase 1; AltName: Full=Gibberellin 2-oxidase 1; AltName: Full=Protein SLENDER [Pisum sativum]
1608	Bni06T008399	98	101	92	356	155	7.19	7.27	6.95	24.61	13.26	7.13667	18.935	1.4077	8.77e-05	0.000531226	Up	Full=Gibberellin 2-beta-dioxygenase 2; AltName: Full=GA 2-oxidase 2; AltName: Full=Gibberellin 2-beta-hydroxylase 2; AltName: Full=Gibberellin 2-oxidase 2 [Pisum sativum]
507	Bni02T002795	16	19	11	601	205	1.17	1.37	0.83	41.54	17.54	1.12333	29.54	4.7168	3.25e-20	2.33e-18	Up	Full=Gibberellin 2-beta-dioxygenase 8; AltName: Full=GA 2-oxidase 8; AltName: Full=Gibberellin 2-beta-hydroxylase 8; AltName: Full=Gibberellin 2-oxidase 8 [Arabidopsis thaliana]
1343	Bni05T007029	10	20	18	294	316	0.73	1.44	1.36	20.32	27.04	1.17667	23.68	4.3309	4.7e-26	5.52e-24	Up	Full=Gibberellin 2-beta-dioxygenase 8; AltName: Full=GA 2-oxidase 8; AltName: Full=Gibberellin 2-beta-hydroxylase 8; AltName: Full=Gibberellin 2-oxidase 8 [Arabidopsis thaliana]
3393	Bni13T018099	12	8	16	69	395	0.88	0.58	1.21	4.77	33.8	0.89	19.285	4.4375	6.82e-08	8.64e-07	Up	Full=Gibberellin 2-beta-dioxygenase 8; AltName: Full=GA 2-oxidase 8; AltName: Full=Gibberellin 2-beta-hydroxylase 8; AltName: Full=Gibberellin 2-oxidase 8 [Arabidopsis thaliana]
156	Bni01T000954	5	3	8	105	46	0.37	0.22	0.6	7.26	3.94	0.396667	5.6	3.8194	9.18e-08	1.13e-06	Up	Full=Gibberellin 3-beta-dioxygenase 1; AltName: Full=GA 3-oxidase 1; AltName: Full=Gibberellin 3 beta-hydroxylase 1 [Pisum sativum]
2322	Bni08T012221	170	152	142	0	0	12.48	10.94	10.72	0	0	11.38	0.001	-13.4742	7.11e-11	1.53e-09	Down	Full=Gibberellin 3-beta-dioxygenase 2; AltName: Full=GA 3-oxidase 2; Short=AtGA3ox2; AltName: Full=Gibberellin 3 beta-hydroxylase 2 [Arabidopsis thaliana]
1766	Bni06T009289	345	293	241	795	905	25.32	21.08	18.2	54.95	77.43	21.5333	66.19	1.62	3.08e-09	5.08e-08	Up	Full=Gibberellin receptor GID1B; AltName: Full=AtCXE14; AltName: Full=Carboxylesterase 14; AltName: Full=GID1-like protein 2; AltName: Full=Protein GA INSENSITIVE DWARF 1B; Short=AtGID1B [Arabidopsis thaliana]
332	Bni01T001764	64	35	17	161	99	4.7	2.52	1.28	11.13	8.47	2.83333	9.8	1.7903	0.00339493	0.0124608	Up	Full=Gibberellin-regulated protein 11; AltName: Full=GAST1 protein homolog 11; Flags: Precursor [Arabidopsis thaliana]
1804	Bni06T009432	49	33	78	211	85	3.6	2.37	5.89	14.59	7.27	3.95333	10.93	1.4672	0.00699983	0.0229166	Up	Full=Gibberellin-regulated protein 7; AltName: Full=GAST1 protein homolog 7; Flags: Precursor [Arabidopsis thaliana]
46	Bni01T000379	48	39	51	176	114	3.52	2.81	3.85	12.17	9.75	3.39333	10.96	1.6915	1.12e-06	1.09e-05	Up	Full=Gibberellin-regulated protein 9; AltName: Full=GAST1 protein homolog 9; Flags: Precursor [Arabidopsis thaliana]
3456	Bni14T018457	4567	3202	1319	54	13	335.16	230.42	99.61	3.73	1.11	221.73	2.42	-6.5177	9.28e-28	1.21e-25	Down	Full=Glucan 1,3-beta-glucosidase 1; AltName: Full=Exo-1,3-beta-glucanase 1; Flags: Precursor [Wickerhamomyces anomalus]
2364	Bni08T012479	40	61	55	678	288	2.94	4.39	4.15	46.87	24.64	3.82667	35.755	3.224	1.71e-16	8.28e-15	Up	Full=Glucan endo-1,3-beta-D-glucosidase; AltName: Full=Major pollen allergen Ole e 9; AltName: Allergen=Ole e 9; Flags: Precursor [Olea europaea]
391	Bni02T002156	305	259	232	488	5014	22.38	18.64	17.52	33.73	429.01	19.5133	231.37	3.5677	0.00166496	0.00677316	Up	Full=Glucan endo-1,3-beta-glucosidase 14; AltName: Full=(1->3)-beta-glucan endohydrolase 14; Short=(1->3)-beta-glucanase 14; AltName: Full=Beta-1,3-endoglucanase 14; Short=Beta-1,3-glucanase 14; Flags: Precursor [Arabidopsis thaliana]
1476	Bni05T007656	13	13	24	41	51	0.95	0.94	1.81	2.83	4.36	1.23333	3.595	1.5434	0.012446	0.0367864	Up	Full=Glucan endo-1,3-beta-glucosidase 4; AltName: Full=(1->3)-beta-glucan endohydrolase 4; Short=(1->3)-beta-glucanase 4; AltName: Full=Beta-1,3-endoglucanase 4; Short=Beta-1,3-glucanase 4; Flags: Precursor [Arabidopsis thaliana]
67	Bni01T000511	219	228	176	467	501	16.07	16.41	13.29	32.28	42.87	15.2567	37.575	1.3003	2.97e-07	3.29e-06	Up	Full=Glucan endo-1,3-beta-glucosidase 5; AltName: Full=(1->3)-beta-glucan endohydrolase 5; Short=(1->3)-beta-glucanase 5; AltName: Full=Beta-1,3-endoglucanase 5; Short=Beta-1,3-glucanase 5; Flags: Precursor [Arabidopsis thaliana]
1849	Bni06T009644	5285	5775	5655	1710	1764	387.85	415.57	427.07	118.2	150.93	410.163	134.565	-1.6079	2.01e-20	1.49e-18	Down	Full=Glucan endo-1,3-beta-glucosidase 7; AltName: Full=(1->3)-beta-glucan endohydrolase 7; Short=(1->3)-beta-glucanase 7; AltName: Full=Beta-1,3-endoglucanase 7; Short=Beta-1,3-glucanase 7; Flags: Precursor [Arabidopsis thaliana]
2319	Bni08T012207	1228	1129	837	31	48	90.12	81.24	63.21	2.14	4.11	78.19	3.125	-4.6451	2.96e-41	8.66e-39	Down	Full=Glucan endo-1,3-beta-glucosidase 8; AltName: Full=(1->3)-beta-glucan endohydrolase 8; Short=(1->3)-beta-glucanase 8; AltName: Full=Beta-1,3-endoglucanase 8; Short=Beta-1,3-glucanase 8; Flags: Precursor [Arabidopsis thaliana]
3055	Bni12T016339	1109	901	519	429	224	81.39	64.84	39.2	29.65	19.17	61.81	24.41	-1.3404	0.000471595	0.00228431	Down	Full=Glucan endo-1,3-beta-glucosidase 8; AltName: Full=(1->3)-beta-glucan endohydrolase 8; Short=(1->3)-beta-glucanase 8; AltName: Full=Beta-1,3-endoglucanase 8; Short=Beta-1,3-glucanase 8; Flags: Precursor [Arabidopsis thaliana]
3482	Bni14T018620	124	75	28	0	0	9.1	5.4	2.11	0	0	5.53667	0.001	-12.4348	1.83e-07	2.13e-06	Down	Full=Glucan endo-1,3-beta-glucosidase 8; AltName: Full=(1->3)-beta-glucan endohydrolase 8; Short=(1->3)-beta-glucanase 8; AltName: Full=Beta-1,3-endoglucanase 8; Short=Beta-1,3-glucanase 8; Flags: Precursor [Arabidopsis thaliana]
375	Bni02T002071	1769	1692	1694	3215	4115	129.82	121.76	127.93	222.23	352.09	126.503	287.16	1.1827	1.01e-06	9.88e-06	Up	Full=Glucomannan 4-beta-mannosyltransferase 2; AltName: Full=Cellulose synthase-like protein A2; Short=AtCslA2; AltName: Full=Glucomannan synthase; AltName: Full=Mannan synthase 2 [Arabidopsis thaliana]
3194	Bni12T017119	158	185	152	6	2	11.6	13.31	11.48	0.41	0.17	12.13	0.29	-5.3864	7.58e-19	4.75e-17	Down	Full=Glucomannan 4-beta-mannosyltransferase 9; AltName: Full=Cellulose synthase-like protein A9; Short=AtCslA9; AltName: Full=Glucomannan synthase; AltName: Full=Mannan synthase 9; AltName: Full=Protein RESISTANT TO AGROBACTERIUM TRANSFORMATION 4 [Arabidopsis thaliana]
306	Bni01T001660	1681	1185	737	502	304	123.36	85.27	55.66	34.7	26.01	88.0967	30.355	-1.5372	4.41e-05	0.000289459	Down	Full=Glucose-1-phosphate adenylyltransferase large subunit 1, chloroplastic/amyloplastic; Short=OsAGPL1; Short=OsAPL1; AltName: Full=ADP-glucose pyrophosphorylase AGPL1; AltName: Full=ADP-glucose synthase AGPL1; Flags: Precursor [Oryza sativa Japonica Group]
1109	Bni04T005941	5079	4238	2748	1120	1294	372.73	304.97	207.53	77.42	110.72	295.077	94.07	-1.6493	2.34e-07	2.66e-06	Down	Full=Glucose-1-phosphate adenylyltransferase small subunit, chloroplastic/amyloplastic; AltName: Full=ADP-glucose pyrophosphorylase; AltName: Full=ADP-glucose synthase; AltName: Full=AGPase B; AltName: Full=Alpha-D-glucose-1-phosphate adenyl transferase; Flags: Precursor [Hordeum vulgare]
1345	Bni05T007042	781	588	299	125	73	57.32	42.31	22.58	8.64	6.25	40.7367	7.445	-2.452	3.78e-08	5.03e-07	Down	Full=Glucose-6-phosphate/phosphate translocator 1, chloroplastic; Short=AtGPT1; Flags: Precursor [Arabidopsis thaliana]
184	Bni01T001063	128	122	114	75	34	9.39	8.78	8.61	5.18	2.91	8.92667	4.045	-1.142	0.00319211	0.0118244	Down	Full=Glucuronoxylan 4-O-methyltransferase 3 [Arabidopsis thaliana]
2773	Bni10T014675	3260	3621	3518	7740	11475	239.24	260.57	265.68	535.02	981.83	255.163	758.425	1.5716	2.82e-08	3.86e-07	Up	Full=Glutamate decarboxylase 5; Short=GAD 5 [Arabidopsis thaliana]
210	Bni01T001207	295	297	247	105	84	21.65	21.37	18.65	7.26	7.19	20.5567	7.225	-1.5085	5.18e-10	9.65e-09	Down	Full=Glutamate receptor 2.7; AltName: Full=Ligand-gated ion channel 2.7; Flags: Precursor [Arabidopsis thaliana]
858	Bni03T004680	242	275	226	1192	653	17.76	19.79	17.07	82.4	55.87	18.2067	69.135	1.9249	4.83e-15	1.93e-13	Up	Full=Glutamate receptor 2.8; AltName: Full=Ligand-gated ion channel 2.8; Flags: Precursor [Arabidopsis thaliana]
361	Bni01T001895	580	601	669	1299	1129	42.56	43.25	50.52	89.79	96.6	45.4433	93.195	1.0362	1.62e-10	3.25e-09	Up	Full=Glutamate receptor 3.3; Short=AtGLR3.3; AltName: Full=Ligand-gated ion channel 3.3; Flags: Precursor [Arabidopsis thaliana]
1059	Bni04T005735	15	5	6	0	0	1.1	0.36	0.45	0	0	0.636667	0.001	-9.3144	0.00668036	0.0220737	Down	Full=Glutamate receptor 3.3; Short=AtGLR3.3; AltName: Full=Ligand-gated ion channel 3.3; Flags: Precursor [Arabidopsis thaliana]
977	Bni04T005337	400	447	410	951	678	29.35	32.17	30.96	65.74	58.01	30.8267	61.875	1.0052	4.01e-10	7.57e-09	Up	Full=Glutamate receptor 3.4; Short=AtGLR4; AltName: Full=Ligand-gated ion channel 3.4; Flags: Precursor [Arabidopsis thaliana]
272	Bni01T001480	9	7	7	0	0	0.66	0.5	0.53	0	0	0.563333	0.001	-9.1378	0.00673597	0.022217	Down	Full=Glutamate receptor 3.6; AltName: Full=Ligand-gated ion channel 3.6; Flags: Precursor [Arabidopsis thaliana]
3592	Bni14T019171	13	22	36	610	257	0.95	1.58	2.72	42.17	21.99	1.75	32.08	4.1962	2.02e-16	9.74e-15	Up	Full=Glutamate receptor 3.6; AltName: Full=Ligand-gated ion channel 3.6; Flags: Precursor [Arabidopsis thaliana]
976	Bni04T005335	313	275	278	503	941	22.97	19.79	20.99	34.77	80.51	21.25	57.64	1.4396	0.000190071	0.00104557	Up	Full=Glutamate receptor 3.7; AltName: Full=Ionotropic glutamate receptor GLR5; AltName: Full=Ligand-gated ion channel 3.7; Flags: Precursor [Arabidopsis thaliana]
2128	Bni07T011184	3	0	5	43	12	0.22	0	0.38	2.97	1.03	0.2	2	3.3219	0.00918599	0.0287029	Up	Full=Glutamate--cysteine ligase, chloroplastic; AltName: Full=Gamma-ECS; Short=GCS; AltName: Full=Gamma-glutamylcysteine synthetase; Flags: Precursor [Medicago truncatula]
2718	Bni10T014435	45	28	35	101	66	3.3	2.01	2.64	6.98	5.65	2.65	6.315	1.2528	0.00388423	0.0140155	Up	Full=Glutaredoxin [Vernicia fordii]
1781	Bni06T009342	33	42	28	117	55	2.42	3.02	2.11	8.09	4.71	2.51667	6.4	1.3466	0.00416221	0.0148818	Up	Full=Glutathione S-transferase PARB; AltName: Full=GST class-phi [Nicotiana tabacum]
2692	Bni10T014337	342	248	177	515	916	25.1	17.85	13.37	35.6	78.38	18.7733	56.99	1.602	0.000251839	0.00132987	Up	Full=Glutathione S-transferase U1; Short=AtGSTU1; AltName: Full=GST class-tau member 1; AltName: Full=Glutathione S-transferase 19 [Arabidopsis thaliana]
1972	Bni07T010371	77	49	73	139	231	5.65	3.53	5.51	9.61	19.77	4.89667	14.69	1.585	0.000631077	0.00295009	Up	Full=Glutathione S-transferase U10; Short=AtGSTU10; AltName: Full=GST class-tau member 10 [Arabidopsis thaliana]
2530	Bni09T013484	172	125	123	161	473	12.62	9	9.29	11.13	40.47	10.3033	25.8	1.3243	0.0166061	0.0466251	Up	Full=Glutathione S-transferase U10; Short=AtGSTU10; AltName: Full=GST class-tau member 10 [Arabidopsis thaliana]
2531	Bni09T013485	69	61	40	13	3	5.06	4.39	3.02	0.9	0.26	4.15667	0.58	-2.8413	6.24e-05	0.000394371	Down	Full=Glutathione S-transferase U10; Short=AtGSTU10; AltName: Full=GST class-tau member 10 [Arabidopsis thaliana]
1512	Bni05T007871	95	97	119	201	216	6.97	6.98	8.99	13.89	18.48	7.64667	16.185	1.0818	0.00032281	0.00165114	Up	Full=Glutathione S-transferase U25; Short=AtGSTU25; AltName: Full=GST class-tau member 25 [Arabidopsis thaliana]
30	Bni01T000239	67	66	58	121	130	4.92	4.75	4.38	8.36	11.12	4.68333	9.74	1.0564	0.00149778	0.00618779	Up	Full=Glutathione S-transferase U7; Short=AtGSTU7; AltName: Full=GST class-tau member 7; AltName: Full=Glutathione S-transferase 25 [Arabidopsis thaliana]
2659	Bni10T014196	52	79	89	68	1021	3.82	5.68	6.72	4.7	87.36	5.40667	46.03	3.0898	0.0146101	0.0419971	Up	Full=Glutathione S-transferase U9; Short=AtGSTU9; AltName: Full=GST class-tau member 9; AltName: Full=Glutathione S-transferase 14 [Arabidopsis thaliana]
2690	Bni10T014334	69	77	64	216	312	5.06	5.54	4.83	14.93	26.7	5.14333	20.815	2.0168	5.59e-08	7.24e-07	Up	Full=Glutathione transferase GST 23; AltName: Full=Glutathione transferase GST 36 [Zea mays]
2691	Bni10T014335	27	46	51	8	6	1.98	3.31	3.85	0.55	0.51	3.04667	0.53	-2.5232	0.000260691	0.00137326	Down	Full=Glutathione transferase GST 23; AltName: Full=Glutathione transferase GST 36 [Zea mays]
3628	BniUnT019439	36	40	39	6	2	2.64	2.88	2.95	0.41	0.17	2.82333	0.29	-3.2833	1.72e-05	0.00012605	Down	Full=Glutathione transferase GST 23; AltName: Full=Glutathione transferase GST 36 [Zea mays]
1948	Bni07T010210	130	131	96	0	1	9.54	9.43	7.25	0	0.09	8.74	0.045	-7.6016	7.34e-08	9.22e-07	Down	Full=Glutelin type-A 1; AltName: Full=Glutelin type I; Contains: RecName: Full=Glutelin type-A 1 acidic chain; Contains: RecName: Full=Glutelin type-A 1 basic chain; Flags: Precursor [Oryza sativa Japonica Group]
1949	Bni07T010211	613	549	433	5	4	44.99	39.51	32.7	0.35	0.34	39.0667	0.345	-6.8232	1.48e-35	3.21e-33	Down	Full=Glutelin type-A 1; AltName: Full=Glutelin type I; Contains: RecName: Full=Glutelin type-A 1 acidic chain; Contains: RecName: Full=Glutelin type-A 1 basic chain; Flags: Precursor [Oryza sativa Japonica Group]
1237	Bni04T006498	317	237	70	1	2	23.26	17.05	5.29	0.07	0.17	15.2	0.12	-6.9849	4.13e-11	9.23e-10	Down	Full=Glyceraldehyde-3-phosphate dehydrogenase 2, cytosolic [Oryza sativa Japonica Group]
1651	Bni06T008644	1941	1482	908	556	440	142.44	106.64	68.57	38.43	37.65	105.883	38.04	-1.4769	1.44e-05	0.000108061	Down	Full=Glycerate dehydrogenase; Short=GDH; AltName: Full=NADH-dependent hydroxypyruvate reductase; Short=HPR [Cucumis sativus]
2275	Bni08T011954	2721	1959	1101	263	190	199.69	140.97	83.15	18.18	16.26	141.27	17.22	-3.0363	3.35e-15	1.36e-13	Down	Full=Glycerophosphocholine acyltransferase 1; Short=GPCAT [Ricinus communis]
3041	Bni12T016271	1599	1516	1548	722	351	117.35	109.09	116.91	49.91	30.03	114.45	39.97	-1.5177	2.82e-09	4.7e-08	Down	Full=Glycine cleavage system H protein 2, mitochondrial; Flags: Precursor [Arabidopsis thaliana]
16	Bni01T000146	56	31	39	146	341	4.11	2.23	2.95	10.09	29.18	3.09667	19.635	2.6646	2.4e-06	2.17e-05	Up	Full=Glycolipid transfer protein 3 [Arabidopsis thaliana]
2583	Bni09T013742	726	625	502	3037	1452	53.28	44.98	37.91	209.93	124.24	45.39	167.085	1.8801	1.87e-10	3.7e-09	Up	Full=Glycosyl hydrolase 5 family protein; AltName: Allergen=Cha o 3; Flags: Precursor [Chamaecyparis obtusa]
2675	Bni10T014273	7	8	7	42	18	0.51	0.58	0.53	2.9	1.54	0.54	2.22	2.0395	0.00605324	0.0203856	Up	Full=Glycosyltransferase BC10; AltName: Full=Protein BRITTLE CULM 10; AltName: Full=Protein FRAGILE CULM 116 [Oryza sativa Japonica Group]
866	Bni03T004711	118	99	61	173	258	8.66	7.12	4.61	11.96	22.08	6.79667	17.02	1.3243	0.00318549	0.011805	Up	Full=Glycosyltransferase family 64 protein C4; Short=GT64 C4; AltName: Full=Protein ECTOPICALLY PARTING CELLS 1; Short=AtEPC1 [Arabidopsis thaliana]
359	Bni01T001882	354	203	32	4	11	25.98	14.61	2.42	0.28	0.94	14.3367	0.61	-4.5548	2.65e-06	2.36e-05	Down	Full=Glycosyltransferase family 92 protein At1g27200 [Arabidopsis thaliana]
2790	Bni10T014748	103	115	137	366	159	7.56	8.28	10.35	25.3	13.6	8.73	19.45	1.1557	0.00170666	0.0069216	Up	Full=Glyoxylate/hydroxypyruvate reductase HPR3; AltName: Full=NAD(P)H-dependent hydroxypyruvate reductase 3; Short=AtHPR3; Short=HPR 3 [Arabidopsis thaliana]
2713	Bni10T014421	302	244	179	128	64	22.16	17.56	13.52	8.85	5.48	17.7467	7.165	-1.3085	0.00058142	0.00274545	Down	Full=G-patch domain and KOW motifs-containing protein [Xenopus laevis]
1012	Bni04T005471	86	62	1	0	1	6.31	4.46	0.08	0	0.09	3.61667	0.045	-6.3286	0.00113664	0.00489747	Down	Full=GPI-anchored protein LLG1; AltName: Full=LORELEI-like-GPI-anchored protein 1; Flags: Precursor [Arabidopsis thaliana]
833	Bni03T004590	3634	3032	2072	859	666	266.69	218.18	156.48	59.38	56.98	213.783	58.18	-1.8776	6.46e-12	1.65e-10	Down	Full=GPN-loop GTPase QQT2; AltName: Full=Protein QUATRE QUART 2 [Arabidopsis thaliana]
2833	Bni10T014967	58	40	22	9	10	4.26	2.88	1.66	0.62	0.86	2.93333	0.74	-1.9869	0.00600739	0.0202628	Down	Full=GRAS family protein RAD1; AltName: Full=Protein REQUIRED FOR ARBUSCULE DEVELOPMENT 1; Short=LjRAD1 [Lotus japonicus]
925	Bni03T004998	430	437	450	14	8	31.56	31.45	33.98	0.97	0.68	32.33	0.825	-5.2923	5.97e-46	2.06e-43	Down	Full=GRF-interacting factor 1; Short=ZmGIF1; AltName: Full=Protein ANGUSTIFOLIA 3 homolog [Zea mays]
2148	Bni07T011255	115	129	115	748	317	8.44	9.28	8.68	51.7	27.12	8.8	39.41	2.163	2.41e-10	4.71e-09	Up	Full=Growth-regulating factor 1; Short=ZmGRF1; AltName: Full=Growth-regulating factor 6 [Zea mays]
146	Bni01T000920	13	15	2	0	0	0.95	1.08	0.15	0	0	0.726667	0.001	-9.5051	0.00710194	0.0231982	Down	Full=G-type lectin S-receptor-like serine/threonine-protein kinase At1g11303; Flags: Precursor [Arabidopsis thaliana]
1130	Bni04T006012	516	499	409	1188	1086	37.87	35.91	30.89	82.12	92.92	34.89	87.52	1.3268	3.54e-12	9.4e-11	Up	Full=G-type lectin S-receptor-like serine/threonine-protein kinase At2g19130; Flags: Precursor [Arabidopsis thaliana]
3382	Bni13T018052	113	121	103	349	310	8.29	8.71	7.78	24.12	26.52	8.26	25.32	1.6161	1.52e-12	4.26e-11	Up	Full=G-type lectin S-receptor-like serine/threonine-protein kinase At4g27290; Flags: Precursor [Arabidopsis thaliana]
905	Bni03T004874	81	80	84	284	119	5.94	5.76	6.34	19.63	10.18	6.01333	14.905	1.3096	0.00066185	0.00307398	Up	Full=G-type lectin S-receptor-like serine/threonine-protein kinase At5g24080; Flags: Precursor [Arabidopsis thaliana]
50	Bni01T000401	97	115	109	25	29	7.12	8.28	8.23	1.73	2.48	7.87667	2.105	-1.9038	8.47e-07	8.47e-06	Down	Full=G-type lectin S-receptor-like serine/threonine-protein kinase At5g35370; Flags: Precursor [Arabidopsis thaliana]
52	Bni01T000405	16	6	11	0	0	1.17	0.43	0.83	0	0	0.81	0.001	-9.6618	0.00209713	0.00824579	Down	Full=G-type lectin S-receptor-like serine/threonine-protein kinase At5g35370; Flags: Precursor [Arabidopsis thaliana]
642	Bni02T003593	83	110	76	201	157	6.09	7.92	5.74	13.89	13.43	6.58333	13.66	1.0531	0.000368778	0.00184796	Up	Full=G-type lectin S-receptor-like serine/threonine-protein kinase At5g35370; Flags: Precursor [Arabidopsis thaliana]
2103	Bni07T011043	35	42	54	150	64	2.57	3.02	4.08	10.37	5.48	3.22333	7.925	1.2979	0.00594428	0.0200891	Up	Full=G-type lectin S-receptor-like serine/threonine-protein kinase At5g35370; Flags: Precursor [Arabidopsis thaliana]
1538	Bni05T007986	380	341	273	493	1851	27.89	24.54	20.62	34.08	158.38	24.35	96.23	1.9826	0.000467243	0.00226768	Up	Full=G-type lectin S-receptor-like serine/threonine-protein kinase B120; Flags: Precursor [Arabidopsis thaliana]
3377	Bni13T018037	195	210	149	337	535	14.31	15.11	11.25	23.29	45.78	13.5567	34.535	1.3491	0.000285031	0.00148204	Up	Full=G-type lectin S-receptor-like serine/threonine-protein kinase B120; Flags: Precursor [Arabidopsis thaliana]
3378	Bni13T018042	15	10	5	50	81	1.1	0.72	0.38	3.46	6.93	0.733333	5.195	2.8246	7.33e-05	0.000455126	Up	Full=G-type lectin S-receptor-like serine/threonine-protein kinase SD1-1; AltName: Full=S-domain-1 (SD1) receptor kinase 1; Short=SD1-1; Flags: Precursor [Arabidopsis thaliana]
3383	Bni13T018055	7	2	6	6	63	0.51	0.14	0.45	0.41	5.39	0.366667	2.9	2.9835	0.0158929	0.0450324	Up	Full=G-type lectin S-receptor-like serine/threonine-protein kinase SD1-1; AltName: Full=S-domain-1 (SD1) receptor kinase 1; Short=SD1-1; Flags: Precursor [Arabidopsis thaliana]
3028	Bni11T016197	0	2	0	39	15	0	0.14	0	2.7	1.28	0.0466667	1.99	5.4142	0.000450323	0.00219358	Up	Full=Guanosine deaminase; AltName: Full=tRNA-specific adenosine deaminase TAD4; Short=AtTAD4 [Arabidopsis thaliana]
3479	Bni14T018600	37	16	6	2	0	2.72	1.15	0.45	0.14	0	1.44	0.07	-4.3626	0.00567929	0.0193602	Down	Full=Guanosine nucleotide diphosphate dissociation inhibitor At5g09550; Short=AtGDI [Arabidopsis thaliana]
451	Bni02T002547	9	9	23	306	109	0.66	0.65	1.74	21.15	9.33	1.01667	15.24	3.9059	5.77e-10	1.06e-08	Up	Full=Haloalkane dehalogenase [Mesorhizobium japonicum MAFF 303099]
849	Bni03T004654	387	601	809	49	52	28.4	43.25	61.1	3.39	4.45	44.25	3.92	-3.4968	1.24e-18	7.6e-17	Down	Full=Heat shock 22 kDa protein, mitochondrial; Flags: Precursor [Pisum sativum]
445	Bni02T002525	529	431	306	141	99	38.82	31.01	23.11	9.75	8.47	30.98	9.11	-1.7658	3.62e-08	4.84e-07	Down	Full=Heat shock 70 kDa protein BIP1; AltName: Full=Heat shock 70 kDa protein 11; AltName: Full=Heat shock protein 70-11; Short=AtHsp70-11; AltName: Full=Luminal-binding protein 1; Short=AtBP1; Short=BiP1; Flags: Precursor [Arabidopsis thaliana]
1871	Bni06T009796	5229	6617	7722	2809	2132	383.74	476.16	583.17	194.17	182.42	481.023	188.295	-1.3531	2.91e-10	5.6e-09	Down	Full=Heat shock 70 kDa protein, mitochondrial; Flags: Precursor [Phaseolus vulgaris]
541	Bni02T002961	1951	2085	1757	189	202	143.18	150.04	132.69	13.06	17.28	141.97	15.17	-3.2263	1.9e-57	1.09e-54	Down	Full=Heat shock cognate 70 kDa protein [Petunia x hybrida]
682	Bni03T003829	6303	8154	9003	4386	3091	462.56	586.76	679.91	303.18	264.47	576.41	283.825	-1.0221	1.04e-06	1.02e-05	Down	Full=Heat shock cognate 70 kDa protein [Petunia x hybrida]
2120	Bni07T011119	793	982	989	119	197	58.2	70.66	74.69	8.23	16.86	67.85	12.545	-2.4352	2.09e-12	5.75e-11	Down	Full=Heat shock protein 83 [Ipomoea nil]
989	Bni04T005393	2782	3375	3790	1281	1094	204.16	242.87	286.22	88.55	93.61	244.417	91.08	-1.4241	2.37e-13	7.42e-12	Down	Full=Heat shock protein 90-6, mitochondrial; Short=AtHSP90.6; Short=AtHsp90-6; AltName: Full=Heat shock protein 89-1; Short=Hsp89-1; Flags: Precursor [Arabidopsis thaliana]
2968	Bni11T015811	40	52	38	360	141	2.94	3.74	2.87	24.88	12.06	3.18333	18.47	2.5366	5.9e-09	9.22e-08	Up	Full=Heat stress transcription factor A-2a; AltName: Full=Heat shock protein 41; AltName: Full=Heat stress transcription factor 11; Short=OsHsf-11; AltName: Full=Heat stress transcription factor 4; Short=rHsf4 [Oryza sativa Japonica Group]
2282	Bni08T011986	108	74	59	167	201	7.93	5.33	4.46	11.54	17.2	5.90667	14.37	1.2826	0.0017788	0.00715371	Up	Full=Heat stress transcription factor A-9; Short=AtHsfA9; AltName: Full=AtHsf-21 [Arabidopsis thaliana]
1074	Bni04T005799	49	29	48	102	139	3.6	2.09	3.62	7.05	11.89	3.10333	9.47	1.6095	0.000673007	0.00310742	Up	Full=Heat stress transcription factor B-4; Short=AtHsfB4; AltName: Full=AtHsf-02 [Arabidopsis thaliana]
2132	Bni07T011195	151	163	142	75	50	11.08	11.73	10.72	5.18	4.28	11.1767	4.73	-1.2406	2.31e-05	0.000163315	Down	Full=Heat stress transcription factor B-4d; AltName: Full=Heat stress transcription factor 10; Short=OsHsf-10 [Oryza sativa Japonica Group]
1262	Bni05T006641	1	0	0	4	79	0.07	0	0	0.28	6.76	0.0233333	3.52	7.237	0.000192439	0.00105423	Up	Full=Heavy metal-associated isoprenylated plant protein 22; Short=AtHIP22; Short=AtHIPP22; AltName: Full=Farnesylated protein 7; Short=AtFP7; Flags: Precursor [Arabidopsis thaliana]
165	Bni01T000985	116	63	86	824	268	8.51	4.53	6.49	56.96	22.93	6.51	39.945	2.6173	4.55e-08	5.99e-07	Up	Full=Heavy metal-associated isoprenylated plant protein 24; Short=AtHIP24; Flags: Precursor [Arabidopsis thaliana]
2666	Bni10T014236	3	2	1	16	13	0.22	0.14	0.08	1.11	1.11	0.146667	1.11	2.9199	0.0103385	0.0316066	Up	Full=Heavy metal-associated isoprenylated plant protein 25; Short=AtHIP25; Short=AtHIPP25; Flags: Precursor [Arabidopsis thaliana]
2026	Bni07T010622	150	136	126	522	405	11.01	9.79	9.52	36.08	34.65	10.1067	35.365	1.807	5.77e-18	3.28e-16	Up	Full=Heavy metal-associated isoprenylated plant protein 30; Short=AtHIP30; AltName: Full=Protein NPCC11; Flags: Precursor [Arabidopsis thaliana]
884	Bni03T004793	140	229	306	1014	322	10.27	16.48	23.11	70.09	27.55	16.62	48.82	1.5546	0.00141116	0.00587489	Up	Full=Heavy metal-associated isoprenylated plant protein 31; Short=AtHIP31; Flags: Precursor [Arabidopsis thaliana]
2989	Bni11T015932	419	449	363	1183	1031	30.75	32.31	27.41	81.77	88.22	30.1567	84.995	1.4949	6.8e-18	3.81e-16	Up	Full=Heavy metal-associated isoprenylated plant protein 32; Short=AtHIP32; Flags: Precursor [Arabidopsis thaliana]
3007	Bni11T016048	20	14	21	181	53	1.47	1.01	1.59	12.51	4.53	1.35667	8.52	2.6508	1.55e-05	0.000114868	Up	Full=Heavy metal-associated isoprenylated plant protein 32; Short=AtHIP32; Flags: Precursor [Arabidopsis thaliana]
1028	Bni04T005575	170	171	204	1	3	12.48	12.31	15.41	0.07	0.26	13.4	0.165	-6.3436	2.6e-16	1.23e-14	Down	Full=Heavy metal-associated isoprenylated plant protein 33; Short=AtHIP33; Flags: Precursor [Arabidopsis thaliana]
1782	Bni06T009343	42	58	38	342	727	3.08	4.17	2.87	23.64	62.2	3.37333	42.92	3.6694	2.58e-14	9.26e-13	Up	Full=Heavy metal-associated isoprenylated plant protein 36; Short=AtHIP36; Flags: Precursor [Arabidopsis thaliana]
1471	Bni05T007641	3131	3538	3898	10378	11422	229.78	254.59	294.38	717.37	977.3	259.583	847.335	1.7067	4.52e-16	2.06e-14	Up	Full=Heavy metal-associated isoprenylated plant protein 7; Short=AtHIP07; AltName: Full=Farnesylated protein 3; Short=AtFP3; Flags: Precursor [Arabidopsis thaliana]
931	Bni03T005040	99	85	95	221	337	7.27	6.12	7.17	15.28	28.83	6.85333	22.055	1.6862	7.69e-06	6.16e-05	Up	Full=Heavy metal-associated isoprenylated plant protein 9; Short=AtHIP09; Flags: Precursor [Arabidopsis thaliana]
2475	Bni09T013199	2019	1599	1174	428	799	148.17	115.06	88.66	29.59	68.36	117.297	48.975	-1.26	0.0023087	0.00893729	Down	Full=Helicase sen1 [Schizosaccharomyces pombe 972h-]
3339	Bni13T017910	0	0	0	24	12	0	0	0	1.66	1.03	0.001	1.345	10.3934	0.00031599	0.00162057	Up	Full=Heme oxygenase 1, chloroplastic; Short=AtHO1; AltName: Full=Protein GENOMES UNCOUPLED 2; AltName: Full=Protein REVERSAL OF THE DET PHENOTYPE 4; Flags: Precursor [Arabidopsis thaliana]
2513	Bni09T013408	2119	1649	642	100	105	155.51	118.66	48.48	6.91	8.98	107.55	7.945	-3.7588	1e-14	3.81e-13	Down	Full=Heparanase-like protein 2; Flags: Precursor [Arabidopsis thaliana]
3324	Bni13T017839	2218	1747	1099	825	481	162.77	125.71	83	57.03	41.16	123.827	49.095	-1.3347	8.59e-05	0.000523055	Down	Full=Heparanase-like protein 3; Flags: Precursor [Arabidopsis thaliana]
3295	Bni13T017688	3233	3488	2776	598	291	237.26	251	209.64	41.34	24.9	232.633	33.12	-2.8123	1.31e-27	1.68e-25	Down	Full=Heptahelical transmembrane protein ADIPOR2; AltName: Full=PAQR family protein ADIPOR2 [Oryza sativa Japonica Group]
844	Bni03T004626	111	121	70	147	490	8.15	8.71	5.29	10.16	41.93	7.38333	26.045	1.8187	0.00268244	0.0101877	Up	Full=Hexose carrier protein HEX6 [Ricinus communis]
2633	Bni10T014030	847	796	527	235	246	62.16	57.28	39.8	16.24	21.05	53.08	18.645	-1.5094	3.49e-07	3.8e-06	Down	Full=Hexosyltransferase GAUT11; AltName: Full=Galacturonosyltransferase 11 [Arabidopsis thaliana]
1067	Bni04T005768	937	994	799	337	240	68.76	71.53	60.34	23.29	20.54	66.8767	21.915	-1.6096	1.14e-17	6.28e-16	Down	Full=Histidine biosynthesis bifunctional protein hisIE, chloroplastic; AltName: Full=Protein HISTIDINE BIOSYNTHESIS 2; Includes: RecName: Full=Phosphoribosyl-AMP cyclohydrolase; Short=PRA-CH; Includes: RecName: Full=Phosphoribosyl-ATP pyrophosphatase; Short=PRA-PH; Flags: Precursor [Arabidopsis thaliana]
3576	Bni14T019093	272	300	344	767	922	19.96	21.59	25.98	53.02	78.89	22.51	65.955	1.5509	5.09e-09	8.02e-08	Up	Full=Histidine kinase 1; AltName: Full=Arabidopsis histidine kinase 1; Short=AtHK1; AltName: Full=Protein AUTHENTIC HIS-KINASE 1 [Arabidopsis thaliana]
211	Bni01T001209	229	321	362	168	123	16.81	23.1	27.34	11.61	10.52	22.4167	11.065	-1.0186	0.000720658	0.00330246	Down	Full=Histidine kinase 5; AltName: Full=Arabidopsis histidine kinase 5; Short=AtHK5; AltName: Full=Protein AUTHENTIC HIS-KINASE 5; AltName: Full=Protein CYTOKININ-INDEPENDENT 2 [Arabidopsis thaliana]
1616	Bni06T008464	113	126	123	443	342	8.29	9.07	9.29	30.62	29.26	8.88333	29.94	1.7529	4.62e-17	2.35e-15	Up	Full=Histidine kinase CKI1; AltName: Full=Protein CYTOKININ-INDEPENDENT 1 [Arabidopsis thaliana]
578	Bni02T003181	440	368	388	1787	842	32.29	26.48	29.3	123.52	72.04	29.3567	97.78	1.7359	1.05e-09	1.86e-08	Up	Full=Histidine-containing phosphotransfer protein 1 [Arabidopsis thaliana]
2997	Bni11T015975	2149	2083	2204	6325	3409	157.71	149.89	166.45	437.21	291.68	158.017	364.445	1.2056	1.86e-08	2.65e-07	Up	Full=Histidine-containing phosphotransfer protein 1 [Arabidopsis thaliana]
3189	Bni12T017089	111	44	23	0	0	8.15	3.17	1.74	0	0	4.35333	0.001	-12.0879	1.15e-06	1.11e-05	Down	Full=Histidine-containing phosphotransfer protein 1 [Arabidopsis thaliana]
152	Bni01T000938	4315	4308	3899	2553	1485	316.67	310	294.45	176.47	127.06	307.04	151.765	-1.0166	1.47e-07	1.73e-06	Down	Full=Histone H2A.v; AltName: Full=H2A.F/Z; Short=H2A.Z [Drosophila melanogaster]
26	Bni01T000213	701	559	454	354	199	51.44	40.23	34.29	24.47	17.03	41.9867	20.75	-1.0168	0.000654517	0.00304238	Down	Full=Histone-lysine N-methyltransferase ASHH1; AltName: Full=ASH1 homolog 1; AltName: Full=Protein SET DOMAIN GROUP 26 [Arabidopsis thaliana]
3293	Bni13T017685	751	721	653	435	172	55.11	51.88	49.31	30.07	14.72	52.1	22.395	-1.2181	0.000269044	0.00140909	Down	Full=Histone-lysine N-methyltransferase ASHR3; AltName: Full=ASH1-related protein 3; AltName: Full=Protein SET DOMAIN GROUP 4; AltName: Full=Protein stamen loss [Arabidopsis thaliana]
2888	Bni11T015391	1536	1504	1744	634	562	112.72	108.23	131.71	43.82	48.09	117.553	45.955	-1.355	2.19e-15	9.1e-14	Down	Full=Histone-lysine N-methyltransferase ATX2; AltName: Full=Protein SET DOMAIN GROUP 30; AltName: Full=Trithorax-homolog protein 2; Short=TRX-homolog protein 2 [Arabidopsis thaliana]
600	Bni02T003323	1876	1303	894	40	19	137.67	93.76	67.52	2.76	1.63	99.65	2.195	-5.5046	1.3e-39	3.34e-37	Down	Full=Histone-lysine N-methyltransferase SUVR4; AltName: Full=Protein SET DOMAIN GROUP 31; AltName: Full=Suppressor of variegation 3-9-related protein 4; Short=Su(var)3-9-related protein 4 [Arabidopsis thaliana]
1259	Bni04T006608	1030	1124	1375	622	492	75.59	80.88	103.84	43	42.1	86.77	42.55	-1.028	5.79e-07	6.07e-06	Down	Full=Histone-lysine N-methyltransferase, H3 lysine-9 specific SUVH4; AltName: Full=Histone H3-K9 methyltransferase 4; Short=H3-K9-HMTase 4; AltName: Full=Protein KRYPTONITE; AltName: Full=Protein SET DOMAIN GROUP 33; AltName: Full=Suppressor of variegation 3-9 homolog protein 4; Short=Su(var)3-9 homolog protein 4 [Arabidopsis thaliana]
2617	Bni09T013911	856	827	747	390	189	62.82	59.51	56.41	26.96	16.17	59.58	21.565	-1.4661	6.09e-08	7.81e-07	Down	Full=Histone-lysine N-methyltransferase, H3 lysine-9 specific SUVH4; AltName: Full=Histone H3-K9 methyltransferase 4; Short=H3-K9-HMTase 4; AltName: Full=Protein KRYPTONITE; AltName: Full=Protein SET DOMAIN GROUP 33; AltName: Full=Suppressor of variegation 3-9 homolog protein 4; Short=Su(var)3-9 homolog protein 4 [Arabidopsis thaliana]
836	Bni03T004600	40	29	3	0	0	2.94	2.09	0.23	0	0	1.75333	0.001	-10.7759	0.000424058	0.00208504	Down	Full=Histone-lysine N-methyltransferase, H3 lysine-9 specific SUVH5; AltName: Full=Histone H3-K9 methyltransferase 5; Short=H3-K9-HMTase 5; AltName: Full=Protein SET DOMAIN GROUP 9; AltName: Full=Suppressor of variegation 3-9 homolog protein 5; Short=Su(var)3-9 homolog protein 5 [Arabidopsis thaliana]
2041	Bni07T010687	677	794	748	365	269	49.68	57.14	56.49	25.23	23.02	54.4367	24.125	-1.174	9.29e-12	2.32e-10	Down	Full=Histone-lysine N-methyltransferase, H3 lysine-9 specific SUVH6; AltName: Full=Histone H3-K9 methyltransferase 6; Short=H3-K9-HMTase 6; AltName: Full=Protein SET DOMAIN GROUP 23; AltName: Full=Suppressor of variegation 3-9 homolog protein 6; Short=Su(var)3-9 homolog protein 6 [Arabidopsis thaliana]
232	Bni01T001337	166	188	181	309	1883	12.18	13.53	13.67	21.36	161.11	13.1267	91.235	2.7971	3.57e-05	0.00023982	Up	Full=Homeobox protein knotted-1-like 4 [Zea mays]
965	Bni04T005272	49	60	64	203	1152	3.6	4.32	4.83	14.03	98.57	4.25	56.3	3.7276	7.92e-08	9.84e-07	Up	Full=Homeobox protein knotted-1-like 4 [Zea mays]
1492	Bni05T007721	469	593	709	1880	1484	34.42	42.67	53.54	129.95	126.98	43.5433	128.465	1.5609	5.95e-12	1.53e-10	Up	Full=Homeobox protein knotted-1-like 4 [Zea mays]
2568	Bni09T013678	281	275	288	852	841	20.62	19.79	21.75	58.89	71.96	20.72	65.425	1.6588	1.19e-17	6.5e-16	Up	Full=Homeobox protein knotted-1-like 4 [Zea mays]
2719	Bni10T014438	62	101	57	177	144	4.55	7.27	4.3	12.23	12.32	5.37333	12.275	1.1918	0.00127298	0.00538268	Up	Full=Homeobox protein knotted-1-like 4 [Zea mays]
2011	Bni07T010581	22	20	22	62	89	1.61	1.44	1.66	4.29	7.62	1.57	5.955	1.9233	0.000160802	0.000900042	Up	Full=Homeobox-leucine zipper protein ATHB-12; AltName: Full=HD-ZIP protein ATHB-12; AltName: Full=Homeodomain transcription factor ATHB-12 [Arabidopsis thaliana]
2751	Bni10T014574	1930	1921	1947	5284	4963	141.64	138.24	147.04	365.25	424.65	142.307	394.95	1.4727	5.08e-25	5.38e-23	Up	Full=Homeobox-leucine zipper protein ATHB-5; AltName: Full=HD-ZIP protein ATHB-5; AltName: Full=Homeodomain transcription factor ATHB-5 [Arabidopsis thaliana]
2533	Bni09T013512	589	620	594	733	2927	43.23	44.62	44.86	50.67	250.44	44.2367	150.555	1.767	0.00159932	0.00654468	Up	Full=Homeobox-leucine zipper protein ATHB-6; AltName: Full=HD-ZIP protein ATHB-6; AltName: Full=Homeodomain transcription factor ATHB-6 [Arabidopsis thaliana]
2539	Bni09T013544	505	583	620	1988	1289	37.06	41.95	46.82	137.42	110.29	41.9433	123.855	1.5621	2.58e-16	1.23e-14	Up	Full=Homeobox-leucine zipper protein ATHB-6; AltName: Full=HD-ZIP protein ATHB-6; AltName: Full=Homeodomain transcription factor ATHB-6 [Arabidopsis thaliana]
1204	Bni04T006368	279	272	237	474	612	20.48	19.57	17.9	32.76	52.36	19.3167	42.56	1.1397	6.18e-05	0.000391005	Up	Full=Homeobox-leucine zipper protein HAT7; AltName: Full=HD-ZIP protein ATHB-3; AltName: Full=Homeodomain transcription factor ATHB-3; AltName: Full=Homeodomain-leucine zipper protein HAT7; Short=HD-ZIP protein 7 [Arabidopsis thaliana]
2771	Bni10T014668	203	256	217	747	306	14.9	18.42	16.39	51.64	26.18	16.57	38.91	1.2316	0.000340512	0.00172635	Up	Full=Homeobox-leucine zipper protein HDG11; AltName: Full=HD-ZIP protein HDG11; AltName: Full=Homeodomain GLABRA 2-like protein 11; AltName: Full=Homeodomain transcription factor HDG11; AltName: Full=Protein ENHANCED DROUGHT TOLERANCE 1; AltName: Full=Protein HOMEODOMAIN GLABROUS 11 [Arabidopsis thaliana]
233	Bni01T001338	16	2	8	45	271	1.17	0.14	0.6	3.11	23.19	0.636667	13.15	4.3684	1.68e-05	0.00012368	Up	Full=Homeobox-leucine zipper protein HOX11; AltName: Full=HD-ZIP protein HOX11; AltName: Full=Homeodomain transcription factor HOX11; AltName: Full=OsHox11 [Oryza sativa Indica Group]
3149	Bni12T016878	126	146	136	488	197	9.25	10.51	10.27	33.73	16.86	10.01	25.295	1.3374	0.000233851	0.0012494	Up	Full=Homeobox-leucine zipper protein HOX11; AltName: Full=HD-ZIP protein HOX11; AltName: Full=Homeodomain transcription factor HOX11; AltName: Full=OsHox11 [Oryza sativa Indica Group]
924	Bni03T004993	39	25	18	154	265	2.86	1.8	1.36	10.65	22.67	2.00667	16.66	3.0535	1.37e-08	2e-07	Up	Full=Homeobox-leucine zipper protein HOX23; AltName: Full=HD-ZIP protein HOX23; AltName: Full=Homeodomain transcription factor HOX23; AltName: Full=OsHox23 [Oryza sativa Indica Group] >Q94GL5.1 RecName: Full=Homeobox-leucine zipper protein HOX23; AltName: Full=HD-ZIP protein HOX23; AltName: Full=Homeodomain transcription factor HOX23; AltName: Full=OsHox23 [Oryza sativa Japonica Group]
3471	Bni14T018567	2661	3044	2990	6774	4729	195.28	219.05	225.81	468.25	404.63	213.38	436.44	1.0324	2.72e-13	8.47e-12	Up	Full=Homeobox-leucine zipper protein HOX23; AltName: Full=HD-ZIP protein HOX23; AltName: Full=Homeodomain transcription factor HOX23; AltName: Full=OsHox23 [Oryza sativa Indica Group] >Q94GL5.1 RecName: Full=Homeobox-leucine zipper protein HOX23; AltName: Full=HD-ZIP protein HOX23; AltName: Full=Homeodomain transcription factor HOX23; AltName: Full=OsHox23 [Oryza sativa Japonica Group]
182	Bni01T001054	963	1004	1037	3855	2076	70.67	72.25	78.31	266.47	177.63	73.7433	222.05	1.5903	3.86e-13	1.18e-11	Up	Full=Homeobox-leucine zipper protein HOX4; AltName: Full=HD-ZIP protein HOX4; AltName: Full=Homeodomain transcription factor HOX4; AltName: Full=OsHox4 [Oryza sativa Japonica Group] >Q9XH37.1 RecName: Full=Homeobox-leucine zipper protein HOX4; AltName: Full=HD-ZIP protein HOX4; AltName: Full=Homeodomain transcription factor HOX4; AltName: Full=OsHox4 [Oryza sativa Indica Group]
2227	Bni08T011769	159	130	90	345	727	11.67	9.35	6.8	23.85	62.2	9.27333	43.025	2.214	3.66e-06	3.17e-05	Up	Full=Homeobox-leucine zipper protein HOX6; AltName: Full=HD-ZIP protein HOX6; AltName: Full=Homeodomain transcription factor HOX6; AltName: Full=OsHox6 [Oryza sativa Japonica Group] >Q9XH35.2 RecName: Full=Homeobox-leucine zipper protein HOX6; AltName: Full=HD-ZIP protein HOX6; AltName: Full=Homeodomain transcription factor HOX6; AltName: Full=OsHox6 [Oryza sativa Indica Group]
1344	Bni05T007039	269	373	421	1440	573	19.74	26.84	31.79	99.54	49.03	26.1233	74.285	1.5077	3.84e-05	0.000256159	Up	Full=Homeobox-leucine zipper protein PROTODERMAL FACTOR 2; AltName: Full=HD-ZIP protein PDF2; AltName: Full=Homeodomain transcription factor PDF2 [Arabidopsis thaliana]
877	Bni03T004760	291	364	290	807	432	21.36	26.19	21.9	55.78	36.96	23.15	46.37	1.0022	0.000122572	0.000713099	Up	Full=Homeobox-leucine zipper protein ROC5; AltName: Full=GLABRA 2-like homeobox protein 5; AltName: Full=HD-ZIP protein ROC5; AltName: Full=Homeodomain transcription factor ROC5; AltName: Full=Protein RICE OUTERMOST CELL-SPECIFIC 5 [Oryza sativa Japonica Group]
2414	Bni09T012886	377	389	400	162	73	27.67	27.99	30.21	11.2	6.25	28.6233	8.725	-1.714	3.16e-08	4.27e-07	Down	Full=Homocysteine S-methyltransferase 1; AltName: Full=S-methylmethionine:homocysteine methyltransferase 1; Short=AtHMT-1; Short=SMM:Hcy S-methyltransferase 1 [Arabidopsis thaliana]
2209	Bni08T011686	367	353	324	130	95	26.93	25.4	24.47	8.99	8.13	25.6	8.56	-1.5805	5.88e-13	1.75e-11	Down	Full=Homologous-pairing protein 2 homolog; AltName: Full=Protein AHP2; Short=AtAHP2; AltName: Full=Protein ARABIDOPSIS HOMOLOG PAIRING 2; AltName: Full=Protein HOP2; Short=AtHOP2 [Arabidopsis thaliana]
464	Bni02T002604	243	252	192	776	756	17.83	18.13	14.5	53.64	64.69	16.82	59.165	1.8146	6.88e-16	3.06e-14	Up	Full=Host cell factor 2; Short=HCF-2; AltName: Full=C2 factor [Mus musculus]
2819	Bni10T014892	46	49	34	199	263	3.38	3.53	2.57	13.76	22.5	3.16	18.13	2.5204	1.17e-10	2.41e-09	Up	Full=HVA22-like protein d; Short=AtHVA22d [Arabidopsis thaliana]
3174	Bni12T016998	1039	670	372	27	28	76.25	48.21	28.09	1.87	2.4	50.85	2.135	-4.5739	6.96e-21	5.34e-19	Down	Full=HVA22-like protein i; Short=AtHVA22i [Arabidopsis thaliana]
470	Bni02T002653	1915	1963	1635	7224	5983	140.54	141.26	123.48	499.35	511.92	135.093	505.635	1.9041	5.08e-41	1.42e-38	Up	Full=Hydrophobic protein LTI6B; AltName: Full=Low temperature-induced protein 6B [Oryza sativa Indica Group] >Q0DKW8.1 RecName: Full=Hydrophobic protein LTI6B; AltName: Full=Low temperature-induced protein 6B [Oryza sativa Japonica Group]
2210	Bni08T011689	354	337	275	976	1536	25.98	24.25	20.77	67.46	131.42	23.6667	99.44	2.071	7.03e-10	1.27e-08	Up	Full=Hydroquinone glucosyltransferase; AltName: Full=Arbutin synthase [Rauvolfia serpentina]
2927	Bni11T015600	140	153	153	20	14	10.27	11.01	11.55	1.38	1.2	10.9433	1.29	-3.0846	2.68e-16	1.27e-14	Down	Full=Hydroxyethylthiazole kinase; AltName: Full=4-methyl-5-beta-hydroxyethylthiazole kinase; Short=TH kinase; Short=Thz kinase [Arabidopsis thaliana]
1786	Bni06T009365	25	27	17	41	87	1.83	1.94	1.28	2.83	7.44	1.68333	5.135	1.609	0.0110341	0.0333787	Up	Full=Hydroxyisourate hydrolase; Short=HIU hydrolase; Short=HIUHase; Flags: Precursor [Glycine max]
1730	Bni06T009098	19	11	5	0	0	1.39	0.79	0.38	0	0	0.853333	0.001	-9.737	0.00220851	0.00862676	Down	Full=Hyoscyamine 6-dioxygenase; AltName: Full=Hyoscyamine 6-beta-hydroxylase [Hyoscyamus niger]
1189	Bni04T006292	11967	12966	13135	7116	4296	878.23	933.04	991.96	491.89	367.58	934.41	429.735	-1.1206	2.74e-10	5.32e-09	Down	Full=Hypersensitive-induced response protein 1; Short=AtHIR1 [Arabidopsis thaliana]
2287	Bni08T012060	835	937	884	536	292	61.28	67.43	66.76	37.05	24.98	65.1567	31.015	-1.0709	3.1e-06	2.73e-05	Down	Full=IAA-amino acid hydrolase ILR1-like 1; Flags: Precursor [Oryza sativa Japonica Group]
3090	Bni12T016570	24	28	8	183	123	1.76	2.01	0.6	12.65	10.52	1.45667	11.585	2.9915	1.08e-07	1.31e-06	Up	Full=Inactive cytochrome P450 76AD1 [Beta vulgaris]
622	Bni02T003461	43	23	3	0	0	3.16	1.66	0.23	0	0	1.68333	0.001	-10.7171	0.000530097	0.00253148	Down	Full=Inactive TPR repeat-containing thioredoxin TTL3; AltName: Full=Tetratricopeptide repeat thioredoxin-like 3; AltName: Full=VH1-interacting TPR-containing protein [Arabidopsis thaliana]
2739	Bni10T014508	51	41	52	3	4	3.74	2.95	3.93	0.21	0.34	3.54	0.275	-3.6862	5.62e-07	5.91e-06	Down	Full=Indole-3-acetate beta-glucosyltransferase; AltName: Full=(Uridine 5'-diphosphate-glucose:indol-3-ylacetyl)-beta-D-glucosyl transferase; AltName: Full=IAA-Glu synthase [Zea mays]
3416	Bni13T018217	54	42	57	249	83	3.96	3.02	4.3	17.21	7.1	3.76	12.155	1.6927	0.000652613	0.00303434	Up	Full=Indole-3-acetate O-methyltransferase 1; AltName: Full=IAA carboxylmethyltransferase 1; AltName: Full=S-adenosyl-L-methionine:(indol-3-yl) acetate carboxylmethyltransferase 1 [Arabidopsis thaliana]
1867	Bni06T009744	42	53	55	77	386	3.08	3.81	4.15	5.32	33.03	3.68	19.175	2.3814	0.000860277	0.00385662	Up	Full=Indole-3-acetic acid-induced protein ARG7 [Vigna radiata var. radiata]
2310	Bni08T012174	71	80	45	14	3	5.21	5.76	3.4	0.97	0.26	4.79	0.615	-2.9614	2.36e-05	0.000166894	Down	Full=Indole-3-pyruvate monooxygenase YUCCA6; AltName: Full=Flavin-containing monooxygenase YUCCA6; AltName: Full=Protein HYPERTALL1 [Arabidopsis thaliana]
1885	Bni06T009854	38	61	98	0	1	2.79	4.39	7.4	0	0.09	4.86	0.045	-6.7549	6.44e-06	5.24e-05	Down	Full=Inorganic pyrophosphatase 1; Short=AtPPsPase1; Short=PPi phosphatase 1; Short=Pyrophosphate-specific phosphatase 1; AltName: Full=Protein PHOSPHATE STARVATION-INDUCED GENE 2; Short=AtPS2 [Arabidopsis thaliana]
1430	Bni05T007436	1001	860	748	67	8	73.46	61.89	56.49	4.63	0.68	63.9467	2.655	-4.5901	2.76e-14	9.83e-13	Down	Full=Inorganic pyrophosphatase 2; Short=AtPPsPase2; Short=PPi phosphatase 2; Short=Pyrophosphate-specific phosphatase 2 [Arabidopsis thaliana]
1431	Bni05T007437	31	35	29	0	0	2.28	2.52	2.19	0	0	2.33	0.001	-11.1861	3.39e-06	2.96e-05	Down	Full=Inorganic pyrophosphatase 2; Short=AtPPsPase2; Short=PPi phosphatase 2; Short=Pyrophosphate-specific phosphatase 2 [Arabidopsis thaliana]
2630	Bni10T013992	1758	1384	849	455	522	129.02	99.59	64.12	31.45	44.66	97.5767	38.055	-1.3585	0.000153264	0.00086373	Down	Full=Inorganic pyrophosphatase TTM1; AltName: Full=Triphosphate tunnel metalloenzyme 1; Short=AtTTM1; Flags: Precursor [Arabidopsis thaliana]
1190	Bni04T006299	2265	2244	2197	908	936	166.22	161.48	165.92	62.76	80.09	164.54	71.425	-1.2039	1.19e-11	2.92e-10	Down	Full=Inositol hexakisphosphate and diphosphoinositol-pentakisphosphate kinase VIP1; AltName: Full=Probable protein QUANTITATIVE VITAMIN E-7; AltName: Full=Protein VIP HOMOLOG 2; AltName: Full=VIP1 homolog protein 1; Short=Arabidopsis homolog protein of yeast VIP1 1; Short=AtVIP1 [Arabidopsis thaliana]
1481	Bni05T007674	901	820	845	385	227	66.12	59.01	63.81	26.61	19.42	62.98	23.015	-1.4523	8.86e-12	2.22e-10	Down	Full=Inositol monophosphatase 3; Short=IMP 3; Short=IMPase 3; Short=LeIMP3; AltName: Full=Inositol-1(or 4)-monophosphatase 3 [Solanum lycopersicum]
3094	Bni12T016585	61	68	73	0	1	4.48	4.89	5.51	0	0.09	4.96	0.045	-6.7843	1.95e-06	1.8e-05	Down	Full=Inositol polyphosphate multikinase beta; AltName: Full=Inositol polyphosphate 6-/3-/5-kinase beta; Short=AtIpk2-beta; Short=AtIpk2beta [Arabidopsis thaliana]
1633	Bni06T008549	294	303	242	87	146	21.58	21.8	18.28	6.01	12.49	20.5533	9.25	-1.1518	0.00299386	0.0111884	Down	Full=Inositol-tetrakisphosphate 1-kinase 3; AltName: Full=Inositol 1,3,4-trisphosphate 5/6-kinase 3; Short=AtItpk-3; Short=Inositol-triphosphate 5/6-kinase 3; Short=Ins(1,3,4)P(3) 5/6-kinase 3 [Arabidopsis thaliana]
2068	Bni07T010827	2348	1872	1196	408	235	172.31	134.71	90.32	28.2	20.11	132.447	24.155	-2.455	2.89e-13	9e-12	Down	Full=Inositol-tetrakisphosphate 1-kinase 5; AltName: Full=Inositol 1,3,4-trisphosphate 5/6-kinase 5; Short=Inositol-triphosphate 5/6-kinase 5; Short=Ins(1,3,4)P(3) 5/6-kinase 5; Short=OsITP5/6K-5; Short=OsITPK5 [Oryza sativa Indica Group] >Q7XBW0.1 RecName: Full=Inositol-tetrakisphosphate 1-kinase 5; AltName: Full=Inositol 1,3,4-trisphosphate 5/6-kinase 5; Short=Inositol-triphosphate 5/6-kinase 5…
3120	Bni12T016762	2255	2182	2201	1001	911	165.49	157.02	166.22	69.19	77.95	162.91	73.57	-1.1469	1.4e-15	5.91e-14	Down	Full=Insulin-degrading enzyme-like 1, peroxisomal; AltName: Full=Insulysin-like 1; AltName: Full=Peroxisomal M16 protease; AltName: Full=Zinc-metallopeptidase [Arabidopsis thaliana]
1448	Bni05T007537	1483	1582	1447	3206	3756	108.83	113.84	109.28	221.61	321.37	110.65	271.49	1.2949	1.46e-09	2.55e-08	Up	Full=Inter-alpha-trypsin inhibitor heavy chain H2; Short=ITI heavy chain H2; Short=ITI-HC2; Short=Inter-alpha-inhibitor heavy chain 2; Flags: Precursor [Mus musculus]
1314	Bni05T006920	628	695	670	368	166	46.09	50.01	50.6	25.44	14.2	48.9	19.82	-1.3029	8.81e-06	6.96e-05	Down	Full=Internal alternative NAD(P)H-ubiquinone oxidoreductase A1, mitochondrial; AltName: Full=Internal alternative NADH dehydrogenase NDA1; AltName: Full=Internal non-phosphorylating NAD(P)H dehydrogenase 1; Short=StNDI1; AltName: Full=NADH:ubiquinone reductase (non-electrogenic) NDA1; Flags: Precursor [Solanum tuberosum]
741	Bni03T004160	28	32	36	48	194	2.05	2.3	2.72	3.32	16.6	2.35667	9.96	2.0794	0.00362671	0.0132022	Up	Full=IQ domain-containing protein IQM3; AltName: Full=IQ motif-containing protein 3 [Arabidopsis thaliana]
3190	Bni12T017091	792	987	1627	5165	1755	58.12	71.02	122.87	357.02	150.16	84.0033	253.59	1.594	0.000291101	0.00150951	Up	Full=IQ domain-containing protein IQM3; AltName: Full=IQ motif-containing protein 3 [Arabidopsis thaliana]
3159	Bni12T016920	109	69	12	2	2	8	4.97	0.91	0.14	0.17	4.62667	0.155	-4.8996	3.04e-05	0.000208291	Down	Full=IQ domain-containing protein IQM6; AltName: Full=IQ motif-containing protein 6 [Arabidopsis thaliana]
3192	Bni12T017114	13	3	8	0	0	0.95	0.22	0.6	0	0	0.59	0.001	-9.2046	0.0100785	0.0309376	Down	Full=Iridoid oxidase; Short=CrIO; AltName: Full=Cytochrome P450 76A26; Short=CrCYP76A26 [Catharanthus roseus]
2155	Bni07T011285	2225	2527	2411	9956	4142	163.29	181.84	182.08	688.2	354.4	175.737	521.3	1.5687	8.53e-08	1.05e-06	Up	Full=IRK-interacting protein [Arabidopsis thaliana]
3185	Bni12T017059	142	102	73	48	37	10.42	7.34	5.51	3.32	3.17	7.75667	3.245	-1.2572	0.00500717	0.0173952	Down	Full=Iron-sulfur assembly protein IscA-like 2, mitochondrial; Flags: Precursor [Arabidopsis thaliana]
1147	Bni04T006076	154	115	104	600	280	11.3	8.28	7.85	41.47	23.96	9.14333	32.715	1.8392	2.29e-07	2.6e-06	Up	Full=IST1 homolog [Mus musculus]
1509	Bni05T007855	353	370	371	1263	1824	25.91	26.63	28.02	87.3	156.07	26.8533	121.685	2.18	1.21e-13	3.97e-12	Up	Full=J domain-containing protein required for chloroplast accumulation response 1 [Arabidopsis thaliana]
1426	Bni05T007413	5	5	2	26	27	0.37	0.36	0.15	1.8	2.31	0.293333	2.055	2.8085	0.00117801	0.0050532	Up	Full=Jacalin-related lectin 19 [Arabidopsis thaliana]
2284	Bni08T012017	1091	990	939	521	440	80.07	71.24	70.91	36.01	37.65	74.0733	36.83	-1.0081	1.54e-09	2.67e-08	Down	Full=K(+) efflux antiporter 4; Short=AtKEA4; Flags: Precursor [Arabidopsis thaliana]
1058	Bni04T005733	19890	13964	4784	13	12	1459.68	1004.85	361.29	0.9	1.03	941.94	0.965	-9.9309	2.85e-63	2.14e-60	Down	Full=KDEL-tailed cysteine endopeptidase CEP2; Flags: Precursor [Arabidopsis thaliana]
1240	Bni04T006509	801	906	786	117	93	58.78	65.2	59.36	8.09	7.96	61.1133	8.025	-2.9289	7.34e-54	3.52e-51	Down	Full=Kelch repeat-containing protein At3g27220 [Arabidopsis thaliana]
2937	Bni11T015680	1496	1379	1020	582	253	109.79	99.23	77.03	40.23	21.65	95.35	30.94	-1.6238	6.85e-07	7.01e-06	Down	Full=KIN14B-interacting protein At4g14310 [Arabidopsis thaliana]
7	Bni01T000096	235	230	188	92	66	17.25	16.55	14.2	6.36	5.65	16	6.005	-1.4138	2.27e-07	2.59e-06	Down	Full=Kinesin-like protein KIN-1; AltName: Full=AtKIN-1; AltName: Full=AtPSS1; AltName: Full=Pollen semi-sterility protein 1 [Arabidopsis thaliana]
2897	Bni11T015443	1756	1754	1647	1057	489	128.87	126.22	124.38	73.06	41.84	126.49	57.45	-1.1386	2.29e-05	0.00016261	Down	Full=Kinesin-like protein KIN-12A; AltName: Full=Phragmoplast-associated kinesin-related protein 1; Short=AtPAKRP1 [Arabidopsis thaliana]
3441	Bni13T018328	177	198	271	828	448	12.99	14.25	20.47	57.23	38.33	15.9033	47.78	1.5871	3.05e-07	3.37e-06	Up	Full=Kinesin-like protein KIN-14K [Oryza sativa Japonica Group]
3113	Bni12T016734	906	875	725	269	127	66.49	62.97	54.75	18.59	10.87	61.4033	14.73	-2.0596	8.49e-13	2.49e-11	Down	Full=Kinesin-like protein KIN-14L [Arabidopsis thaliana]
438	Bni02T002486	1034	982	879	515	192	75.88	70.66	66.38	35.6	16.43	70.9733	26.015	-1.4479	2.92e-05	0.000201016	Down	Full=Kinesin-like protein KIN-14S [Arabidopsis thaliana]
2880	Bni11T015333	92	85	110	268	150	6.75	6.12	8.31	18.53	12.83	7.06	15.68	1.1512	0.000309312	0.00158869	Up	Full=Kinesin-like protein KIN-14T [Arabidopsis thaliana]
3180	Bni12T017039	4664	3599	2119	1022	419	342.28	258.98	160.03	70.64	35.85	253.763	53.245	-2.2528	3.71e-08	4.94e-07	Down	Full=Kinesin-like protein KIN-5C; AltName: Full=125 kDa kinesin-related protein [Nicotiana tabacum]
338	Bni01T001785	952	951	1112	290	142	69.86	68.43	83.98	20.05	12.15	74.09	16.1	-2.2022	4.94e-16	2.23e-14	Down	Full=Kinesin-like protein KIN-6 [Arabidopsis thaliana]
3100	Bni12T016634	546	620	747	344	160	40.07	44.62	56.41	23.78	13.69	47.0333	18.735	-1.3279	2.49e-05	0.000174634	Down	Full=Kinesin-like protein KIN-7N [Arabidopsis thaliana]
2626	Bni10T013963	1164	1141	793	675	268	85.42	82.11	59.89	46.66	22.93	75.8067	34.795	-1.1234	0.00162918	0.00664796	Down	Full=Kinesin-like protein KIN-8A [Oryza sativa Japonica Group]
2239	Bni08T011830	1639	1565	1394	880	377	120.28	112.62	105.28	60.83	32.26	112.727	46.545	-1.2761	2e-05	0.000143943	Down	Full=Kinesin-like protein NACK2; AltName: Full=NPK1-activating kinesin 2 [Nicotiana tabacum]
1900	Bni06T009930	230	380	322	176	95	16.88	27.34	24.32	12.17	8.13	22.8467	10.15	-1.1705	0.000604927	0.00284092	Down	Full=Kinetochore protein NDC80 homolog [Arabidopsis thaliana]
657	Bni03T003669	68	44	24	1	0	4.99	3.17	1.81	0.07	0	3.32333	0.035	-6.5691	4.7e-05	0.000305812	Down	Full=L10-interacting MYB domain-containing protein [Arabidopsis thaliana]
1686	Bni06T008844	332	323	354	35	45	24.36	23.24	26.73	2.42	3.85	24.7767	3.135	-2.9824	1.28e-22	1.11e-20	Down	Full=L-2-hydroxyglutarate dehydrogenase, mitochondrial; Short=Duranin; Flags: Precursor [Pongo abelii]
1854	Bni06T009667	92	56	31	269	77	6.75	4.03	2.34	18.59	6.59	4.37333	12.59	1.5255	0.0177654	0.049224	Up	Full=Laccase-11; AltName: Full=Benzenediol:oxygen oxidoreductase 11; AltName: Full=Diphenol oxidase 11; AltName: Full=Urishiol oxidase 11; Flags: Precursor [Arabidopsis thaliana]
42	Bni01T000358	50	27	14	161	106	3.67	1.94	1.06	11.13	9.07	2.22333	10.1	2.1836	0.000241218	0.00128162	Up	Full=Laccase-15; AltName: Full=Benzenediol:oxygen oxidoreductase 15; AltName: Full=Diphenol oxidase 15; AltName: Full=Protein TRANSPARENT TESTA 10; AltName: Full=Urishiol oxidase 15; Flags: Precursor [Arabidopsis thaliana]
549	Bni02T003015	30	18	23	124	45	2.2	1.3	1.74	8.57	3.85	1.74667	6.21	1.83	0.00151957	0.00625238	Up	Full=Laccase-17; AltName: Full=Benzenediol:oxygen oxidoreductase 17; AltName: Full=Diphenol oxidase 17; AltName: Full=Urishiol oxidase 17; Flags: Precursor [Arabidopsis thaliana]
1968	Bni07T010355	87	98	52	278	108	6.38	7.05	3.93	19.22	9.24	5.78667	14.23	1.2981	0.00615668	0.0206775	Up	Full=Laccase-7; AltName: Full=Benzenediol:oxygen oxidoreductase 7; AltName: Full=Diphenol oxidase 7; AltName: Full=Urishiol oxidase 7; Flags: Precursor [Arabidopsis thaliana]
1307	Bni05T006889	359	273	226	65	49	26.35	19.65	17.07	4.49	4.19	21.0233	4.34	-2.2762	8.77e-12	2.2e-10	Down	Full=Lactosylceramide 4-alpha-galactosyltransferase; AltName: Full=Alpha-1,4-N-acetylglucosaminyltransferase; AltName: Full=Alpha-1,4-galactosyltransferase; AltName: Full=Alpha4Gal-T1; AltName: Full=Globotriaosylceramide synthase; Short=Gb3 synthase; AltName: Full=UDP-galactose:beta-D-galactosyl-beta1-R 4-alpha-D-galactosyltransferase [Rattus norvegicus]
1959	Bni07T010277	1831	1892	1946	443	147	134.37	136.15	146.96	30.62	12.58	139.16	21.6	-2.6876	1.55e-13	4.94e-12	Down	Full=Lactosylceramide 4-alpha-galactosyltransferase; AltName: Full=Alpha-1,4-N-acetylglucosaminyltransferase; AltName: Full=Alpha-1,4-galactosyltransferase; AltName: Full=Globotriaosylceramide synthase; Short=Gb3 synthase; AltName: Full=UDP-galactose:beta-D-galactosyl-beta1-R 4-alpha-D-galactosyltransferase [Pongo pygmaeus]
1820	Bni06T009528	2991	2175	1230	743	354	219.5	156.51	92.89	51.36	30.29	156.3	40.825	-1.9368	2.67e-06	2.38e-05	Down	Full=LAG1 longevity assurance homolog 2; Short=LAG1 homolog 2 [Arabidopsis thaliana]
1826	Bni06T009560	40	27	3	2	0	2.94	1.94	0.23	0.14	0	1.70333	0.07	-4.6049	0.00579327	0.0196789	Down	Full=La-related protein 6C; Short=AtLARP6c [Arabidopsis thaliana]
2458	Bni09T013096	74	83	96	173	210	5.43	5.97	7.25	11.96	17.97	6.21667	14.965	1.2674	0.000191675	0.00105138	Up	Full=Large ribosomal RNA subunit accumulation protein YCED homolog 2, chloroplastic; AltName: Full=Protein DUF177B; Flags: Precursor [Arabidopsis thaliana]
1660	Bni06T008712	104	110	114	11	21	7.63	7.92	8.61	0.76	1.8	8.05333	1.28	-2.6534	3.86e-08	5.14e-07	Down	Full=L-ascorbate oxidase homolog; Flags: Precursor [Brassica napus]
1661	Bni06T008713	8080	6508	4408	185	123	592.97	468.32	332.89	12.79	10.52	464.727	11.655	-5.3174	4.35e-70	4.42e-67	Down	Full=L-ascorbate oxidase homolog; Flags: Precursor [Brassica napus]
1923	Bni06T010066	138	85	30	8	20	10.13	6.12	2.27	0.55	1.71	6.17333	1.13	-2.4497	0.00305827	0.011386	Down	Full=L-ascorbate oxidase homolog; Flags: Precursor [Brassica napus]
1924	Bni06T010068	1794	1024	13	5	51	131.66	73.69	0.98	0.35	4.36	68.7767	2.355	-4.8681	0.0132668	0.0387941	Down	Full=L-ascorbate oxidase homolog; Flags: Precursor [Brassica napus]
3229	Bni12T017296	58	28	25	2	6	4.26	2.01	1.89	0.14	0.51	2.72	0.325	-3.0651	0.000720793	0.00330246	Down	Full=L-ascorbate peroxidase 2, cytosolic; AltName: Full=L-ascorbate peroxidase 1b; Short=APX1b; Short=AtAPx02 [Arabidopsis thaliana]
3577	Bni14T019098	726	772	600	245	185	53.28	55.55	45.31	16.94	15.83	51.38	16.385	-1.6488	4.84e-16	2.2e-14	Down	Full=L-ascorbate peroxidase 3; Short=AtAPx03 [Arabidopsis thaliana]
1210	Bni04T006383	617	640	537	217	124	45.28	46.05	40.55	15	10.61	43.96	12.805	-1.7795	6.54e-14	2.23e-12	Down	Full=L-aspartate oxidase, chloroplastic; AltName: Full=Protein FLAGELLIN-INSENSITIVE 4; Flags: Precursor [Arabidopsis thaliana]
2117	Bni07T011102	312	294	169	344	1663	22.9	21.16	12.76	23.78	142.29	18.94	83.035	2.1323	0.001097	0.00475852	Up	Full=Late embryogenesis abundant protein At1g64065 [Arabidopsis thaliana]
2731	Bni10T014480	108	108	52	12	15	7.93	7.77	3.93	0.83	1.28	6.54333	1.055	-2.6328	5.9e-06	4.85e-05	Down	Full=Late embryogenesis abundant protein D-29; Short=LEA D-29 [Gossypium hirsutum]
3010	Bni11T016071	105	87	129	1058	526	7.71	6.26	9.74	73.13	45.01	7.90333	59.07	2.9019	5.35e-19	3.41e-17	Up	Full=Late embryogenesis abundant protein Lea5 [Citrus sinensis]
2677	Bni10T014277	165	161	93	1025	1034	12.11	11.59	7.02	70.85	88.47	10.24	79.66	2.9596	2.82e-21	2.23e-19	Up	Full=LEAF RUST 10 DISEASE-RESISTANCE LOCUS RECEPTOR-LIKE PROTEIN KINASE-like 1.1; AltName: Full=Probable receptor-like serine/threonine-protein kinase LRK10L-1.1; Flags: Precursor [Arabidopsis thaliana]
2542	Bni09T013557	62	69	80	264	81	4.55	4.97	6.04	18.25	6.93	5.18667	12.59	1.2794	0.00958588	0.0297105	Up	Full=LEAF RUST 10 DISEASE-RESISTANCE LOCUS RECEPTOR-LIKE PROTEIN KINASE-like 1.5; AltName: Full=Probable receptor-like serine/threonine-protein kinase LRK10L-1.5; Flags: Precursor [Arabidopsis thaliana]
240	Bni01T001368	223	224	196	482	426	16.37	16.12	14.8	33.32	36.45	15.7633	34.885	1.146	5.04e-09	7.95e-08	Up	Full=Lecithin-cholesterol acyltransferase-like 1 [Arabidopsis thaliana]
1375	Bni05T007188	174	205	188	80	62	12.77	14.75	14.2	5.53	5.3	13.9067	5.415	-1.3607	3.31e-07	3.63e-06	Down	Full=Lectin; AltName: Full=Agglutinin; Short=LAA [Luffa acutangula]
878	Bni03T004764	2985	4520	5411	2091	856	219.06	325.26	408.64	144.54	73.24	317.653	108.89	-1.5446	2.95e-05	0.000202796	Down	Full=Leucine-rich repeat receptor protein kinase EMS1; AltName: Full=Protein EXCESS MICROSPOROCYTES 1; AltName: Full=Protein EXTRA SPOROGENOUS CELLS; Flags: Precursor [Arabidopsis thaliana]
2756	Bni10T014604	5	2	6	89	39	0.37	0.14	0.45	6.15	3.34	0.32	4.745	3.8903	4.29e-07	4.61e-06	Up	Full=Leucine-rich repeat receptor-like protein kinase PXC1; AltName: Full=Protein PXY/TDR-CORRELATED 1; Flags: Precursor [Arabidopsis thaliana]
2701	Bni10T014360	60	36	25	126	247	4.4	2.59	1.89	8.71	21.13	2.96	14.92	2.3336	6.19e-05	0.000391542	Up	Full=Leucine-rich repeat receptor-like serine/threonine/tyrosine-protein kinase SOBIR1; AltName: Full=Protein EVERSHED; AltName: Full=Protein SUPPRESSOR OF BIR1-1; Flags: Precursor [Arabidopsis thaliana]
640	Bni02T003572	323	489	493	1286	878	23.7	35.19	37.23	88.89	75.12	32.04	82.005	1.3558	9.43e-08	1.16e-06	Up	Full=Leucine-rich repeat receptor-like serine/threonine-protein kinase BAM1; AltName: Full=Protein BARELY ANY MERISTEM 1; Flags: Precursor [Arabidopsis thaliana]
2295	Bni08T012096	253	219	184	376	597	18.57	15.76	13.9	25.99	51.08	16.0767	38.535	1.2612	0.000548953	0.00260854	Up	Full=Leucine-rich repeat receptor-like serine/threonine-protein kinase BAM1; AltName: Full=Protein BARELY ANY MERISTEM 1; Flags: Precursor [Arabidopsis thaliana]
2714	Bni10T014424	504	594	518	1524	820	36.99	42.74	39.12	105.34	70.16	39.6167	87.75	1.1473	9.96e-07	9.8e-06	Up	Full=Leucine-rich repeat receptor-like serine/threonine-protein kinase BAM2; AltName: Full=Protein BARELY ANY MERISTEM 2; Flags: Precursor [Arabidopsis thaliana]
3122	Bni12T016764	1174	1238	1166	1904	10429	86.16	89.09	88.06	131.61	892.33	87.77	511.97	2.5443	0.00501618	0.017423	Up	Full=Leucine-rich repeat receptor-like tyrosine-protein kinase PXC3; AltName: Full=Protein PXY/TDR-CORRELATED 3; Flags: Precursor [Arabidopsis thaliana]
1814	Bni06T009490	223	246	192	334	817	16.37	17.7	14.5	23.09	69.9	16.19	46.495	1.522	0.0011906	0.00509798	Up	Full=Leucine-rich repeat serine/threonine-protein kinase 1; AltName: Full=Leucine-rich repeats, ras-like domain, kinase protein 1; AltName: Full=PARK8-related kinase [Caenorhabditis elegans]
86	Bni01T000625	95	89	77	429	290	6.97	6.4	5.82	29.65	24.81	6.39667	27.23	2.0898	1.05e-16	5.23e-15	Up	Full=L-gulonolactone oxidase 3; Short=AtGulLO3; Flags: Precursor [Arabidopsis thaliana]
81	Bni01T000584	353	357	214	811	783	25.91	25.69	16.16	56.06	67	22.5867	61.53	1.4458	8.03e-07	8.08e-06	Up	Full=Light-inducible protein CPRF2; AltName: Full=Common plant regulatory factor 2; Short=CPRF-2 [Petroselinum crispum]
2448	Bni09T013061	456	373	194	887	2201	33.46	26.84	14.65	61.31	188.32	24.9833	124.815	2.3208	1.12e-05	8.61e-05	Up	Full=Lignin-forming anionic peroxidase; Flags: Precursor [Nicotiana sylvestris]
246	Bni01T001383	781	767	744	3334	2621	57.32	55.19	56.19	230.46	224.26	56.2333	227.36	2.0155	3.42e-61	2.27e-58	Up	Full=LIM domain-containing protein WLIM1; AltName: Full=Widely-expressed LIM protein 1; Short=AtWLIM1 [Arabidopsis thaliana]
2738	Bni10T014504	66	64	49	205	277	4.84	4.61	3.7	14.17	23.7	4.38333	18.935	2.111	2.07e-08	2.92e-07	Up	Full=LIM domain-containing protein WLIM1; AltName: Full=Widely-expressed LIM protein 1; Short=AtWLIM1 [Arabidopsis thaliana]
3469	Bni14T018540	6	8	3	19	27	0.44	0.58	0.23	1.31	2.31	0.416667	1.81	2.119	0.0149309	0.0427271	Up	Full=Linamarin synthase 2; AltName: Full=Cyanohydrin UDP-glucosyltransferase UGT85K5 [Manihot esculenta]
2019	Bni07T010596	18	28	32	0	0	1.32	2.01	2.42	0	0	1.91667	0.001	-10.9044	1.66e-05	0.000122368	Down	Full=LINE-1 retrotransposable element ORF2 protein; Short=ORF2p; AltName: Full=Long interspersed element-1; Short=L1; AltName: Full=Retrovirus-related Pol polyprotein LINE-1; Includes: RecName: Full=Reverse transcriptase; Includes: RecName: Full=Endonuclease [Mus musculus]
2982	Bni11T015888	66	68	78	117	255	4.84	4.89	5.89	8.09	21.82	5.20667	14.955	1.5222	0.00228571	0.00886817	Up	Full=Linoleate 9S-lipoxygenase 5; AltName: Full=Lipoxygenase 5; Short=AtLOX5 [Arabidopsis thaliana]
2572	Bni09T013687	1039	1008	895	531	303	76.25	72.54	67.59	36.7	25.93	72.1267	31.315	-1.2037	5e-08	6.54e-07	Down	Full=Lipase; AltName: Full=Phospholipase A1; AltName: Full=Triacylglycerol lipase; Contains: RecName: Full=Lipase 86 kDa form; Contains: RecName: Full=Lipase 46 kDa form; Flags: Precursor [Staphylococcus hyicus]
1141	Bni04T006052	269	316	289	92	71	19.74	22.74	21.83	6.36	6.07	21.4367	6.215	-1.7863	5.11e-14	1.76e-12	Down	Full=Lipoyl synthase 2, mitochondrial; AltName: Full=Lipoate synthase 2; Short=LS 2; Short=Lip-syn 2; AltName: Full=Lipoic acid synthase 2 [Pisum sativum]
2197	Bni08T011611	6	11	8	53	18	0.44	0.79	0.6	3.66	1.54	0.61	2.6	2.0916	0.00711666	0.0232374	Up	Full=LOB domain-containing protein 18; AltName: Full=ASYMMETRIC LEAVES 2-like protein 20; Short=AS2-like protein 20 [Arabidopsis thaliana]
2400	Bni09T012752	340	532	542	0	0	24.95	38.28	40.93	0	0	34.72	0.001	-15.0835	2.84e-14	1.01e-12	Down	Full=LOB domain-containing protein 18; AltName: Full=ASYMMETRIC LEAVES 2-like protein 20; Short=AS2-like protein 20 [Arabidopsis thaliana]
3631	BniUnT019448	61	52	80	172	132	4.48	3.74	6.04	11.89	11.29	4.75333	11.59	1.2859	0.000188765	0.00104038	Up	Full=LOB domain-containing protein 21; AltName: Full=ASYMMETRIC LEAVES 2-like protein 12; Short=AS2-like protein 12 [Arabidopsis thaliana]
1435	Bni05T007457	396	324	195	5	0	29.06	23.32	14.73	0.35	0	22.37	0.175	-6.9981	2.04e-18	1.22e-16	Down	Full=LOB domain-containing protein 22; AltName: Full=ASYMMETRIC LEAVES 2-like protein 30; Short=AS2-like protein 30 [Arabidopsis thaliana]
1191	Bni04T006304	47	29	18	0	1	3.45	2.09	1.36	0	0.09	2.3	0.045	-5.6756	0.000250462	0.00132422	Down	Full=LOB domain-containing protein 27; AltName: Full=ASYMMETRIC LEAVES 2-like protein 29; Short=AS2-like protein 29 [Arabidopsis thaliana]
2741	Bni10T014519	23	18	5	0	0	1.69	1.3	0.38	0	0	1.12333	0.001	-10.1336	0.000852518	0.0038268	Down	Full=LOB domain-containing protein 27; AltName: Full=ASYMMETRIC LEAVES 2-like protein 29; Short=AS2-like protein 29 [Arabidopsis thaliana]
1057	Bni04T005731	272	217	63	0	0	19.96	15.62	4.76	0	0	13.4467	0.001	-13.715	6.56e-10	1.2e-08	Down	Full=LOB domain-containing protein 30; AltName: Full=ASYMMETRIC LEAVES 2-like protein 19; Short=AS2-like protein 19 [Arabidopsis thaliana]
1507	Bni05T007843	21	29	10	0	1	1.54	2.09	0.76	0	0.09	1.46333	0.045	-5.0232	0.00181986	0.00729001	Down	Full=LOB domain-containing protein 36; AltName: Full=ASYMMETRIC LEAVES 2-like protein 1; Short=AS2-like protein 1 [Arabidopsis thaliana]
253	Bni01T001404	7	11	9	69	21	0.51	0.79	0.68	4.77	1.8	0.66	3.285	2.3154	0.00205822	0.00810941	Up	Full=LOB domain-containing protein 38; AltName: Full=ASYMMETRIC LEAVES 2-like protein 40; Short=AS2-like protein 40 [Arabidopsis thaliana]
1364	Bni05T007131	4	6	2	36	26	0.29	0.43	0.15	2.49	2.22	0.29	2.355	3.0216	0.000338205	0.00171767	Up	Full=LOB domain-containing protein 4; AltName: Full=ASYMMETRIC LEAVES 2-like protein 6; Short=AS2-like protein 6 [Arabidopsis thaliana]
365	Bni02T001938	653	628	438	253	80	47.92	45.19	33.08	17.49	6.85	42.0633	12.17	-1.7892	3.1e-05	0.000211622	Down	Full=LOB domain-containing protein 6; AltName: Full=Crown rootless-like protein 3; AltName: Full=Protein ASYMMETRIC LEAVES 2 [Oryza sativa Indica Group] >Q8LQH4.1 RecName: Full=LOB domain-containing protein 6; AltName: Full=Crown rootless-like protein 3; AltName: Full=Protein ASYMMETRIC LEAVES 2 [Oryza sativa Japonica Group]
1733	Bni06T009115	11	16	5	0	1	0.81	1.15	0.38	0	0.09	0.78	0.045	-4.1155	0.0174826	0.0485493	Down	Full=LOB domain-containing protein CRL1; AltName: Full=Protein ADVENTITIOUS ROOTLESS 1; Short=OsARL1; AltName: Full=Protein CROWN ROOTLESS 1 [Oryza sativa Japonica Group]
2694	Bni10T014339	1232	985	733	581	243	90.41	70.88	55.36	40.16	20.79	72.2167	30.475	-1.2447	0.000646621	0.00301053	Down	Full=Loganic acid O-methyltransferase; Short=CrLAMT [Catharanthus roseus]
2695	Bni10T014342	68	81	68	327	364	4.99	5.83	5.14	22.6	31.14	5.32	26.87	2.3365	1.17e-15	5.01e-14	Up	Full=Loganic acid O-methyltransferase; Short=CrLAMT [Catharanthus roseus]
463	Bni02T002595	1749	2022	2329	985	779	128.35	145.5	175.89	68.09	66.65	149.913	67.37	-1.154	1.33e-09	2.34e-08	Down	Full=Lon protease homolog, mitochondrial [Zea mays]
54	Bni01T000421	1646	1651	1539	731	654	120.8	118.81	116.23	50.53	55.96	118.613	53.245	-1.1555	1.34e-15	5.7e-14	Down	Full=Long chain acyl-CoA synthetase 9, chloroplastic [Arabidopsis thaliana]
2824	Bni10T014917	74	60	35	14	17	5.43	4.32	2.64	0.97	1.45	4.13	1.21	-1.7711	0.00312779	0.0116111	Down	Full=Long chain base biosynthesis protein 2a [Oryza sativa Japonica Group]
2662	Bni10T014216	40	65	44	11	16	2.94	4.68	3.32	0.76	1.37	3.64667	1.065	-1.7757	0.0025592	0.00976909	Down	Full=LRR receptor-like serine/threonine-protein kinase EFR; AltName: Full=Elongation factor Tu receptor; Short=EF-Tu receptor; Flags: Precursor [Arabidopsis thaliana]
2869	Bni11T015213	25	28	19	85	107	1.83	2.01	1.43	5.88	9.16	1.75667	7.52	2.0979	7.76e-06	6.2e-05	Up	Full=LRR receptor-like serine/threonine-protein kinase EFR; AltName: Full=Elongation factor Tu receptor; Short=EF-Tu receptor; Flags: Precursor [Arabidopsis thaliana]
863	Bni03T004701	3519	4323	5081	1905	744	258.25	311.08	383.72	131.68	63.66	317.683	97.67	-1.7016	6.07e-07	6.35e-06	Down	Full=LRR receptor-like serine/threonine-protein kinase ERL1; AltName: Full=Protein ERECTA-like kinase 1; Flags: Precursor [Arabidopsis thaliana]
2984	Bni11T015903	317	333	332	204	76	23.26	23.96	25.07	14.1	6.5	24.0967	10.3	-1.2262	0.000997678	0.00437939	Down	Full=LRR receptor-like serine/threonine-protein kinase GSO2; AltName: Full=Protein EMBRYO SAC DEVELOPMENT ARREST 23; AltName: Full=Protein GASSHO 2; Flags: Precursor [Arabidopsis thaliana]
3490	Bni14T018684	400	389	402	935	1454	29.35	27.99	30.36	64.63	124.41	29.2333	94.52	1.693	1.02e-07	1.25e-06	Up	Full=LRR receptor-like serine/threonine-protein kinase HSL2; AltName: Full=Protein HAESA-LIKE2; Flags: Precursor [Arabidopsis thaliana]
5	Bni01T000085	193	174	129	225	974	14.16	12.52	9.74	15.55	83.34	12.14	49.445	2.0261	0.00122988	0.00523632	Up	Full=LRR receptor-like serine/threonine-protein kinase RCH1; AltName: Full=Protein ROOT CLAVATA-HOMOLOG1 1; Flags: Precursor [Arabidopsis thaliana]
497	Bni02T002772	1692	1341	913	528	413	124.17	96.5	68.95	36.5	35.34	96.54	35.92	-1.4263	1.87e-06	1.74e-05	Down	Full=LRR repeats and ubiquitin-like domain-containing protein At2g30105 [Arabidopsis thaliana]
933	Bni03T005046	156	144	111	649	404	11.45	10.36	8.38	44.86	34.57	10.0633	39.715	1.9806	9.31e-14	3.11e-12	Up	Full=L-type lectin-domain containing receptor kinase IV.2; Short=Arabidopsis thaliana lectin-receptor kinase a4; Short=AthlecRK-a4; Short=LecRK-IV.2; AltName: Full=Protein SMALL, GLUED-TOGETHER, AND COLLAPSED POLLEN; Flags: Precursor [Arabidopsis thaliana]
1872	Bni06T009803	72	50	38	209	220	5.28	3.6	2.87	14.45	18.82	3.91667	16.635	2.0865	1.57e-07	1.85e-06	Up	Full=L-type lectin-domain containing receptor kinase IX.1; Short=LecRK-IX.1; Flags: Precursor [Arabidopsis thaliana]
2710	Bni10T014400	151	154	164	367	553	11.08	11.08	12.39	25.37	47.32	11.5167	36.345	1.658	1.11e-06	1.08e-05	Up	Full=L-type lectin-domain containing receptor kinase S.1; Short=LecRK-S.1; Flags: Precursor [Arabidopsis thaliana]
3	Bni01T000078	345	272	114	28	44	25.32	19.57	8.61	1.94	3.76	17.8333	2.85	-2.6455	4.18e-06	3.57e-05	Down	Full=L-type lectin-domain containing receptor kinase S.6; Short=LecRK-S.6; Flags: Precursor [Arabidopsis thaliana]
3226	Bni12T017270	384	464	472	792	1077	28.18	33.39	35.65	54.75	92.15	32.4067	73.45	1.1805	4.37e-05	0.000287146	Up	Full=L-type lectin-domain containing receptor kinase VIII.1; Short=LecRK-VIII.1; Flags: Precursor [Arabidopsis thaliana]
2469	Bni09T013174	494	611	675	109	44	36.25	43.97	50.98	7.53	3.76	43.7333	5.645	-2.9537	3.16e-17	1.63e-15	Down	Full=Lupeol synthase [Ricinus communis]
2470	Bni09T013176	375	399	319	1175	692	27.52	28.71	24.09	81.22	59.21	26.7733	70.215	1.391	6.36e-10	1.16e-08	Up	Full=Lupeol synthase [Ricinus communis]
1239	Bni04T006501	264	188	115	576	552	19.37	13.53	8.68	39.82	47.23	13.86	43.525	1.6509	1.74e-05	0.000127935	Up	Full=Lysine histidine transporter 1 [Arabidopsis thaliana]
2595	Bni09T013787	1620	1210	516	420	429	118.89	87.07	38.97	29.03	36.71	81.6433	32.87	-1.3126	0.00456533	0.0160834	Down	Full=Lysine histidine transporter-like 2 [Arabidopsis thaliana]
2487	Bni09T013257	37	19	31	140	122	2.72	1.37	2.34	9.68	10.44	2.14333	10.06	2.2307	3.73e-07	4.05e-06	Up	Full=Lysine histidine transporter-like 6 [Arabidopsis thaliana]
3588	Bni14T019146	184	141	126	69	67	13.5	10.15	9.52	4.77	5.73	11.0567	5.25	-1.0745	0.00185498	0.0074093	Down	Full=Lysine histidine transporter-like 8; AltName: Full=Amino acid transporter-like protein 1 [Arabidopsis thaliana]
3582	Bni14T019117	883	1080	1325	586	267	64.8	77.72	100.06	40.51	22.85	80.86	31.68	-1.3519	2.97e-05	0.000203909	Down	Full=Lysine-specific demethylase 3A-A; AltName: Full=JmjC domain-containing histone demethylation protein 2A; AltName: Full=Jumonji domain-containing protein 1A-A; AltName: Full=[histone H3]-dimethyl-L-lysine(9) demethylase 3A-A [Xenopus laevis]
2696	Bni10T014345	5304	4975	3963	1700	1680	389.25	358	299.29	117.51	143.75	348.847	130.63	-1.4171	6.9e-12	1.75e-10	Down	Full=MA3 DOMAIN-CONTAINING TRANSLATION REGULATORY FACTOR 1; AltName: Full=MA3 domain-containing protein 6 [Arabidopsis thaliana]
1878	Bni06T009833	208	229	194	371	814	15.26	16.48	14.65	25.64	69.65	15.4633	47.645	1.6235	0.000201795	0.00109991	Up	Full=MADS-box protein AGL24; AltName: Full=Protein AGAMOUS-LIKE 24 [Arabidopsis thaliana]
869	Bni03T004727	169	144	155	326	361	12.4	10.36	11.71	22.53	30.89	11.49	26.71	1.217	5.57e-06	4.6e-05	Up	Full=MADS-box protein AGL42; AltName: Full=Protein AGAMOUS-LIKE 42; AltName: Full=Protein FOREVER YOUNG FLOWER [Arabidopsis thaliana]
2504	Bni09T013365	237	212	226	1321	469	17.39	15.26	17.07	91.31	40.13	16.5733	65.72	1.9875	1.02e-07	1.25e-06	Up	Full=MADS-box protein EJ2; AltName: Full=MADS-box protein 1; Short=LeMADS1; AltName: Full=Protein ENHANCER-OF-JOINTLESS-2 [Solanum lycopersicum]
1877	Bni06T009832	9	7	3	34	176	0.66	0.5	0.23	2.35	15.06	0.463333	8.705	4.2317	5.97e-06	4.89e-05	Up	Full=MADS-box protein JOINTLESS; AltName: Full=LeMADS [Solanum lycopersicum]
2374	Bni08T012524	12	12	6	1	0	0.88	0.86	0.45	0.07	0	0.73	0.035	-4.3825	0.0168165	0.0471086	Down	Full=MADS-box protein JOINTLESS; AltName: Full=LeMADS [Solanum lycopersicum]
2356	Bni08T012449	12	28	39	626	1046	0.88	2.01	2.95	43.27	89.5	1.94667	66.385	5.0918	1.45e-22	1.25e-20	Up	Full=MADS-box protein SOC1; AltName: Full=Agamous-like MADS-box protein AGL20; AltName: Full=Protein SUPPRESSOR OF CONSTANS OVEREXPRESSION 1 [Arabidopsis thaliana]
2358	Bni08T012453	18	30	36	896	724	1.32	2.16	2.72	61.94	61.95	2.06667	61.945	4.9056	1.23e-56	6.84e-54	Up	Full=MADS-box protein SOC1; AltName: Full=Agamous-like MADS-box protein AGL20; AltName: Full=Protein SUPPRESSOR OF CONSTANS OVEREXPRESSION 1 [Arabidopsis thaliana]
2816	Bni10T014882	192	168	207	2646	5321	14.09	12.09	15.63	182.9	455.28	13.9367	319.09	4.517	2.32e-30	3.78e-28	Up	Full=MADS-box transcription factor 15; AltName: Full=FDRMADS3; AltName: Full=OsMADS15; AltName: Full=Protein APETALA1-like A; AltName: Full=RMADS215 [Oryza sativa Japonica Group]
1521	Bni05T007917	44	18	4	0	0	3.23	1.3	0.3	0	0	1.61	0.001	-10.6528	0.000503315	0.00241829	Down	Full=MADS-box transcription factor 30; AltName: Full=OsMADS30 [Oryza sativa Japonica Group]
2168	Bni08T011426	72	70	99	227	117	5.28	5.04	7.48	15.69	10.01	5.93333	12.85	1.1149	0.00273446	0.0103602	Up	Full=Magnesium dechelatase SGRL, chloroplastic; AltName: Full=Protein STAY-GREEN LIKE; Flags: Precursor [Arabidopsis thaliana]
1735	Bni06T009146	213	204	180	500	345	15.63	14.68	13.59	34.56	29.52	14.6333	32.04	1.1306	7.92e-08	9.84e-07	Up	Full=Magnesium transporter MRS2-I [Oryza sativa Indica Group]
1680	Bni06T008825	21	34	28	132	129	1.54	2.45	2.11	9.12	11.04	2.03333	10.08	2.3096	9e-09	1.36e-07	Up	Full=Magnesium-chelatase 30 kDa subunit; AltName: Full=Mg-protoporphyrin IX chelatase [Rhodobacter capsulatus]
3118	Bni12T016757	203	242	278	662	320	14.9	17.41	20.99	45.76	27.38	17.7667	36.57	1.0415	0.000795409	0.00360985	Up	Full=Magnesium-chelatase subunit ChlH, chloroplastic; Short=Mg-chelatase subunit H; AltName: Full=ABA-binding protein; AltName: Full=Mg-protoporphyrin IX chelatase subunit ChlH; AltName: Full=Protein CONDITIONAL CHLORINA; AltName: Full=Protein GENOMES UNCOUPLED 5; AltName: Full=Protein RAPID TRANSPIRATION IN DETACHED LEAVES 1; Flags: Precursor [Arabidopsis thaliana]
958	Bni04T005243	115	73	19	14	4	8.44	5.25	1.43	0.97	0.34	5.04	0.655	-2.9439	0.00140031	0.00584241	Down	Full=Major allergen Mal d 1; AltName: Full=AP15; AltName: Full=Allergen Mal d I; AltName: Allergen=Mal d 1 [Malus domestica]
1132	Bni04T006021	204	218	124	1	1	14.97	15.69	9.36	0.07	0.09	13.34	0.08	-7.3815	1.2e-11	2.94e-10	Down	Full=Malonyl-coenzyme:anthocyanin 5-O-glucoside-6'''-O-malonyltransferase; Short=Malonyl CoA:anthocyanin 5-O-glucoside-6'''-O-malonyltransferase; Short=Ss5MaT1 [Salvia splendens]
2166	Bni08T011404	832	769	490	1	0	61.06	55.34	37	0.07	0	51.1333	0.035	-10.5127	5.51e-13	1.65e-11	Down	Full=Mannan endo-1,4-beta-mannosidase 5; AltName: Full=Beta-mannanase 5; AltName: Full=Endo-beta-1,4-mannanase 5; AltName: Full=LeMAN5; Flags: Precursor [Solanum lycopersicum] >Q9FZ03.2 RecName: Full=Mannan endo-1,4-beta-mannosidase 2; AltName: Full=Beta-mannanase 2; AltName: Full=Endo-beta-1,4-mannanase 2; AltName: Full=LeMAN2; Flags: Precursor [Solanum lycopersicum]
3554	Bni14T018998	655	634	608	2084	2851	48.07	45.62	45.92	144.05	243.94	46.5367	193.995	2.0596	2.54e-14	9.13e-13	Up	Full=Mannan endo-1,4-beta-mannosidase 7; AltName: Full=Beta-mannanase 7; AltName: Full=Endo-beta-1,4-mannanase 7; Short=AtMAN7; Flags: Precursor [Arabidopsis thaliana]
1017	Bni04T005503	614	866	917	350	270	45.06	62.32	69.25	24.19	23.1	58.8767	23.645	-1.3162	1.25e-07	1.5e-06	Down	Full=Mannose-6-phosphate isomerase 1; AltName: Full=Phosphohexomutase 1; AltName: Full=Phosphomannose isomerase 1; Short=PMI1; AltName: Full=Protein MATERNAL EFFECT EMBRYO ARREST 31 [Arabidopsis thaliana]
3106	Bni12T016692	39	39	35	0	0	2.86	2.81	2.64	0	0	2.77	0.001	-11.4357	1.1e-06	1.07e-05	Down	Full=MATH domain and coiled-coil domain-containing protein At3g58250; AltName: Full=RTM3-like protein At3g58250 [Arabidopsis thaliana]
2623	Bni10T013958	611	442	93	0	0	44.84	31.81	7.02	0	0	27.89	0.001	-14.7675	1.65e-11	3.93e-10	Down	Full=Mavicyanin [Cucurbita pepo]
1724	Bni06T009040	2288	1798	1201	869	771	167.91	129.38	90.7	60.07	65.97	129.33	63.02	-1.0372	0.000672496	0.00310672	Down	Full=MDIS1-interacting receptor like kinase 1; Short=AtMIK1; AltName: Full=Leucine-rich repeat receptor-like protein kinase PXL2; AltName: Full=Protein PHLOEM INTERCALATED WITH XYLEM-LIKE 2; Flags: Precursor [Arabidopsis thaliana]
29	Bni01T000235	114	117	109	503	1907	8.37	8.42	8.23	34.77	163.17	8.34	98.97	3.5689	4.1e-10	7.73e-09	Up	Full=Mechanosensitive ion channel protein 10; AltName: Full=Mechanosensitive channel of small conductance-like 10; AltName: Full=MscS-Like protein 10; Short=AtMSL10 [Arabidopsis thaliana]
1571	Bni05T008155	44	32	9	3	1	3.23	2.3	0.68	0.21	0.09	2.07	0.15	-3.7866	0.00128021	0.00540963	Down	Full=Mediator of RNA polymerase II transcription subunit 15a [Arabidopsis thaliana]
2602	Bni09T013829	3543	3366	2937	1559	1169	260.01	242.22	221.8	107.76	100.02	241.343	103.89	-1.216	2.37e-15	9.77e-14	Down	Full=Meiosis-specific protein ASY1; AltName: Full=Protein ASYNAPTIC 1; Short=AtASY1 [Arabidopsis thaliana]
1594	Bni06T008316	829	768	785	172	89	60.84	55.27	59.28	11.89	7.62	58.4633	9.755	-2.5833	3.74e-25	4.06e-23	Down	Full=Meiosis-specific protein ASY3; AltName: Full=Protein ASYNAPTIC 3; Short=AtASY3 [Arabidopsis thaliana]
2288	Bni08T012062	253	246	229	97	46	18.57	17.7	17.29	6.71	3.94	17.8533	5.325	-1.7453	6.1e-08	7.81e-07	Down	Full=Meiotic nuclear division protein 1 homolog; Short=AtMND1; AltName: Full=Meiotic nuclear division 1-like protein [Arabidopsis thaliana]
2965	Bni11T015803	685	733	599	2	7	50.27	52.75	45.24	0.14	0.6	49.42	0.37	-7.0614	8.17e-42	2.43e-39	Down	Full=Meiotic recombination protein DMC1 homolog [Glycine max]
3428	Bni13T018274	112	81	63	4	4	8.22	5.83	4.76	0.28	0.34	6.27	0.31	-4.3381	3.7e-10	7.02e-09	Down	Full=Meiotic recombination protein SPO11-1; Short=AtSPO11-1 [Arabidopsis thaliana]
3211	Bni12T017213	698	541	582	229	152	51.22	38.93	43.95	15.83	13.01	44.7	14.42	-1.6322	5.43e-12	1.41e-10	Down	Full=Membrane magnesium transporter; AltName: Full=ER membrane protein complex subunit 5 homolog [Arabidopsis thaliana]
1529	Bni05T007958	242	157	204	588	435	17.76	11.3	15.41	40.64	37.22	14.8233	38.93	1.393	3.11e-07	3.43e-06	Up	Full=Membrane protein PM19L; AltName: Full=PM19-like protein 1; Short=OsPM19L1 [Oryza sativa Japonica Group]
831	Bni03T004584	45	77	57	22	12	3.3	5.54	4.3	1.52	1.03	4.38	1.275	-1.7804	0.000930366	0.00413116	Down	Full=Metacaspase-1; Short=AtMC1; AltName: Full=Metacaspase 1b; Short=AtMCP1b; AltName: Full=Protein LSD ONE LIKE 3 [Arabidopsis thaliana]
3072	Bni12T016466	3508	2585	1345	187	65	257.44	186.02	101.57	12.93	5.56	181.677	9.245	-4.2966	3.64e-19	2.4e-17	Down	Full=Metacaspase-9; Short=AtMC9; Contains: RecName: Full=Metacaspase-9 subunit p20; Contains: RecName: Full=Metacaspase-9 subunit p10; AltName: Full=Metacaspase 2f; Short=AtMCP2f [Arabidopsis thaliana]
3151	Bni12T016888	155	129	115	791	357	11.38	9.28	8.68	54.68	30.55	9.78	42.615	2.1235	3.35e-10	6.4e-09	Up	Full=Metal tolerance protein 4; Short=OsMTP4 [Oryza sativa Japonica Group]
1985	Bni07T010426	1992	2273	2667	4732	4685	146.19	163.57	201.41	327.09	400.86	170.39	363.975	1.095	8.23e-08	1.02e-06	Up	Full=Metallothionein-like protein type 2 [Actinidia deliciosa]
2008	Bni07T010573	85	63	42	212	367	6.24	4.53	3.17	14.65	31.4	4.64667	23.025	2.3089	2.16e-06	1.97e-05	Up	Full=Metal-nicotianamine transporter YSL1; AltName: Full=Protein YELLOW STRIPE LIKE 1; Short=AtYSL1 [Arabidopsis thaliana]
1564	Bni05T008107	1464	1745	1489	3816	2359	107.44	125.57	112.45	263.78	201.84	115.153	232.81	1.0156	2.62e-08	3.62e-07	Up	Full=Methyl-CpG-binding domain-containing protein 10; Short=AtMBD10; Short=MBD10; AltName: Full=Methyl-CpG-binding protein MBD10 [Arabidopsis thaliana]
522	Bni02T002888	1263	1114	908	585	308	92.69	80.16	68.57	40.44	26.35	80.4733	33.395	-1.2689	2.99e-06	2.64e-05	Down	Full=Methylsterol monooxygenase 2-2; AltName: Full=Sterol 4-alpha-methyl-oxidase 1; Short=AtSMO1; AltName: Full=Sterol 4-alpha-methyl-oxidase 2-2 [Arabidopsis thaliana]
2252	Bni08T011864	229	186	163	502	487	16.81	13.38	12.31	34.7	41.67	14.1667	38.185	1.4305	2.35e-08	3.29e-07	Up	Full=Methylthioribose-1-phosphate isomerase; Short=M1Pi; Short=MTR-1-P isomerase; AltName: Full=S-methyl-5-thioribose-1-phosphate isomerase; AltName: Full=Translation initiation factor eIF-2B subunit alpha/beta/delta-like protein [Ricinus communis]
1399	Bni05T007304	1703	1190	595	221	248	124.98	85.63	44.93	15.28	21.22	85.18	18.25	-2.2226	6.64e-07	6.83e-06	Down	Full=Methyltransferase-like protein 22 [Homo sapiens]
323	Bni01T001711	711	746	695	416	246	52.18	53.68	52.49	28.76	21.05	52.7833	24.905	-1.0836	1.73e-07	2.02e-06	Down	Full=Microspherule protein 1; AltName: Full=58 kDa microspherule protein [Mus musculus]
1472	Bni05T007644	253	191	222	59	45	18.57	13.74	16.77	4.08	3.85	16.36	3.965	-2.0448	2.62e-11	6.04e-10	Down	Full=Microtubule-associated protein 70-5; Short=AtMAP70-5; AltName: Full=70 kDa microtubule-associated protein 5 [Arabidopsis thaliana]
824	Bni03T004538	1252	1151	847	588	271	91.88	82.83	63.97	40.64	23.19	79.56	31.915	-1.3178	3.21e-05	0.000217884	Down	Full=Mini-chromosome maintenance complex-binding protein; Short=MCM-BP; Short=MCM-binding protein; AltName: Full=Protein E2F TARGET GENE 1 [Arabidopsis thaliana]
2108	Bni07T011059	300	553	496	818	1041	22.02	39.79	37.46	56.54	89.07	33.09	72.805	1.1376	0.000967885	0.00426922	Up	Full=Mitochondrial adenine nucleotide transporter ADNT1; AltName: Full=Adenine nucleotide transporter 1 [Arabidopsis thaliana]
1400	Bni05T007309	242	196	112	83	43	17.76	14.1	8.46	5.74	3.68	13.44	4.71	-1.5127	0.000989853	0.004355	Down	Full=Mitochondrial arginine transporter BAC2; AltName: Full=Mitochondrial basic amino acid carrier 2; Short=AtMBAC2 [Arabidopsis thaliana]
909	Bni03T004897	1196	1304	1189	603	459	87.77	93.84	89.79	41.68	39.27	90.4667	40.475	-1.1604	9.21e-17	4.61e-15	Down	Full=Mitochondrial carrier protein MTM1; AltName: Full=Manganese tracking factor for mitochondrial SOD2 [Arabidopsis thaliana]
2208	Bni08T011675	192	209	110	90	63	14.09	15.04	8.31	6.22	5.39	12.48	5.805	-1.1042	0.00537067	0.0184722	Down	Full=Mitochondrial carrier protein MTM1; AltName: Full=Manganese tracking factor for mitochondrial SOD2 [Arabidopsis thaliana]
2822	Bni10T014903	102	100	207	20	5	7.49	7.2	15.63	1.38	0.43	10.1067	0.905	-3.4812	1.28e-07	1.53e-06	Down	Full=Mitochondrial import inner membrane translocase subunit TIM8 [Arabidopsis thaliana]
1986	Bni07T010427	311	254	234	135	84	22.82	18.28	17.67	9.33	7.19	19.59	8.26	-1.2459	1.37e-05	0.000103388	Down	Full=Mitochondrial import inner membrane translocase subunit Tim9 [Oryza sativa Japonica Group]
1249	Bni04T006548	843	973	837	506	313	61.87	70.02	63.21	34.98	26.78	65.0333	30.88	-1.0745	6.27e-08	8e-07	Down	Full=Mitochondrial import receptor subunit TOM20; AltName: Full=Translocase of outer membrane 20 kDa subunit [Solanum tuberosum]
857	Bni03T004674	570	628	620	306	246	41.83	45.19	46.82	21.15	21.05	44.6133	21.1	-1.0802	1.34e-10	2.72e-09	Down	Full=Mitochondrial intermediate peptidase, mitochondrial; AltName: Full=AtOCT1; Flags: Precursor [Arabidopsis thaliana]
250	Bni01T001392	562	601	672	265	191	41.24	43.25	50.75	18.32	16.34	45.08	17.33	-1.3792	3.68e-12	9.76e-11	Down	Full=Mitochondrial outer membrane protein porin 2; AltName: Full=Voltage-dependent anion-selective channel protein 2; Short=AtVDAC2; Short=VDAC-2 [Arabidopsis thaliana]
2752	Bni10T014578	447	672	820	160	69	32.8	48.36	61.93	11.06	5.9	47.6967	8.48	-2.4918	2.14e-10	4.19e-09	Down	Full=Mitochondrial outer membrane protein porin 4; AltName: Full=Voltage-dependent anion-selective channel protein 4; Short=OsVDAC4 [Oryza sativa Japonica Group]
1810	Bni06T009471	135	79	67	11	11	9.91	5.68	5.06	0.76	0.94	6.88333	0.85	-3.0176	2e-07	2.3e-06	Down	Full=Mitochondrial outer membrane protein porin of 36 kDa; AltName: Full=POM 36; AltName: Full=Voltage-dependent anion-selective channel protein; Short=VDAC [Solanum tuberosum]
3590	Bni14T019158	1544	1034	551	0	0	113.31	74.41	41.61	0	0	76.4433	0.001	-16.2221	2.85e-16	1.35e-14	Down	Full=Mitochondrial uncoupling protein 3; Short=AtPUMP3 [Arabidopsis thaliana]
1881	Bni06T009846	11	14	7	24	72	0.81	1.01	0.53	1.66	6.16	0.783333	3.91	2.3195	0.00457082	0.0160929	Up	Full=Mitochondrial uncoupling protein 4; Short=AtPUMP4; AltName: Full=Mitochondrial dicarboxylate carrier 2 [Arabidopsis thaliana]
1044	Bni04T005650	548	598	634	2241	2850	40.22	43.03	47.88	154.91	243.85	43.71	199.38	2.1895	4.74e-18	2.73e-16	Up	Full=Mitochondrial uncoupling protein 5; Short=AtPUMP5; AltName: Full=Mitochondrial dicarboxylate carrier 1 [Arabidopsis thaliana]
1940	Bni07T010174	29	27	8	2	4	2.13	1.94	0.6	0.14	0.34	1.55667	0.24	-2.6974	0.011983	0.0356804	Down	Full=Mitoferrin-1; AltName: Full=Mitochondrial iron transporter 1; AltName: Full=Protein frascati; AltName: Full=Solute carrier family 25 member 37 [Danio rerio]
2293	Bni08T012083	1245	968	594	417	250	91.37	69.66	44.86	28.82	21.39	68.63	25.105	-1.4509	5.16e-05	0.000332249	Down	Full=Mitogen-activated protein kinase kinase 6; Short=AtMKK6; Short=MAP kinase kinase 6; AltName: Full=Protein Arabidopsis NQK1 homolog [Arabidopsis thaliana]
2782	Bni10T014711	168	186	168	253	680	12.33	13.38	12.69	17.49	58.18	12.8	37.835	1.5636	0.00169628	0.00688274	Up	Full=Mitogen-activated protein kinase kinase 9; Short=AtMKK9; Short=MAP kinase kinase 9 [Arabidopsis thaliana]
2409	Bni09T012844	382	272	114	1	0	28.03	19.57	8.61	0.07	0	18.7367	0.035	-9.0643	3.85e-09	6.2e-08	Down	Full=Mitogen-activated protein kinase kinase kinase 1; Short=ARAKIN; Short=AtMEKK1; Short=MAP kinase kinase kinase 1 [Arabidopsis thaliana]
3181	Bni12T017048	16	25	8	2	0	1.17	1.8	0.6	0.14	0	1.19	0.07	-4.0875	0.00580963	0.0197112	Down	Full=Mitogen-activated protein kinase kinase kinase 1; Short=ARAKIN; Short=AtMEKK1; Short=MAP kinase kinase kinase 1 [Arabidopsis thaliana]
1640	Bni06T008581	25	39	80	0	0	1.83	2.81	6.04	0	0	3.56	0.001	-11.7977	1.48e-06	1.4e-05	Down	Full=Mitogen-activated protein kinase kinase kinase 17 [Arabidopsis thaliana]
1935	Bni07T010137	5	9	10	0	0	0.37	0.65	0.76	0	0	0.593333	0.001	-9.2127	0.00661586	0.0219087	Down	Full=Mitogen-activated protein kinase kinase kinase 17 [Arabidopsis thaliana]
2407	Bni09T012841	185	102	48	0	0	13.58	7.34	3.62	0	0	8.18	0.001	-12.9979	1.19e-08	1.75e-07	Down	Full=Mitogen-activated protein kinase kinase kinase 17 [Arabidopsis thaliana]
2408	Bni09T012843	28	24	5	0	0	2.05	1.73	0.38	0	0	1.38667	0.001	-10.4374	0.000434376	0.00212489	Down	Full=Mitogen-activated protein kinase kinase kinase 17 [Arabidopsis thaliana]
2474	Bni09T013198	10	24	12	0	0	0.73	1.73	0.91	0	0	1.12333	0.001	-10.1336	0.000441801	0.00215693	Down	Full=Mitogen-activated protein kinase kinase kinase 17 [Arabidopsis thaliana]
3300	Bni13T017704	15	24	48	0	0	1.1	1.73	3.62	0	0	2.15	0.001	-11.0701	2.42e-05	0.000170538	Down	Full=Mitogen-activated protein kinase kinase kinase 17 [Arabidopsis thaliana]
3301	Bni13T017705	11	23	41	0	0	0.81	1.66	3.1	0	0	1.85667	0.001	-10.8585	6.3e-05	0.000397363	Down	Full=Mitogen-activated protein kinase kinase kinase 17 [Arabidopsis thaliana]
425	Bni02T002419	29	34	48	2	0	2.13	2.45	3.62	0.14	0	2.73333	0.07	-5.2872	2.17e-05	0.00015454	Down	Full=Mitogen-activated protein kinase kinase kinase 18 [Arabidopsis thaliana]
437	Bni02T002484	444	420	523	283	168	32.58	30.22	39.5	19.56	14.37	34.1	16.965	-1.0072	7.04e-05	0.000439377	Down	Full=Mitogen-activated protein kinase kinase kinase ANP1; AltName: Full=Arabidopsis NPK1-related kinase 1 [Arabidopsis thaliana]
2476	Bni09T013207	6	5	9	0	0	0.44	0.36	0.68	0	0	0.493333	0.001	-8.9464	0.0125938	0.0371597	Down	Full=Mitogen-activated protein kinase kinase kinase ANP1; AltName: Full=Arabidopsis NPK1-related kinase 1 [Arabidopsis thaliana]
32	Bni01T000273	1012	988	875	1771	2031	74.27	71.1	66.08	122.42	173.78	70.4833	148.1	1.0712	1.08e-06	1.05e-05	Up	Full=MLO-like protein 1; Short=AtMlo1; AltName: Full=MLO protein homolog 1; Short=AtMlo-H1 [Arabidopsis thaliana]
1281	Bni05T006776	35	30	23	75	189	2.57	2.16	1.74	5.18	16.17	2.15667	10.675	2.3074	0.00014844	0.000839831	Up	Full=MLO-like protein 2; Short=AtMlo2 [Arabidopsis thaliana]
556	Bni02T003061	53	55	63	166	91	3.89	3.96	4.76	11.47	7.79	4.20333	9.63	1.196	0.00083732	0.0037674	Up	Full=MLO-like protein 3; Short=AtMlo3 [Arabidopsis thaliana]
3465	Bni14T018522	249	234	225	1018	566	18.27	16.84	16.99	70.37	48.43	17.3667	59.4	1.7741	1.57e-13	4.99e-12	Up	Full=MLO-like protein 4; Short=AtMlo4 [Arabidopsis thaliana]
2430	Bni09T012997	45	36	41	0	0	3.3	2.59	3.1	0	0	2.99667	0.001	-11.5491	7.32e-07	7.46e-06	Down	Full=MLP-like protein 31 [Arabidopsis thaliana]
2893	Bni11T015417	2110	2239	2325	16947	7458	154.85	161.12	175.58	1171.44	638.13	163.85	904.785	2.4652	3.77e-19	2.46e-17	Up	Full=MLP-like protein 31 [Arabidopsis thaliana]
3042	Bni12T016278	299	184	120	1382	680	21.94	13.24	9.06	95.53	58.18	14.7467	76.855	2.3818	3.54e-08	4.73e-07	Up	Full=MLP-like protein 328 [Arabidopsis thaliana]
3256	Bni13T017507	46	35	19	38	676	3.38	2.52	1.43	2.63	57.84	2.44333	30.235	3.6293	0.00746309	0.024166	Up	Full=MLP-like protein 328 [Arabidopsis thaliana]
3534	Bni14T018893	494	581	610	1219	1021	36.25	41.81	46.07	84.26	87.36	41.3767	85.81	1.0523	8.54e-10	1.53e-08	Up	Full=Molybdenum cofactor sulfurase; Short=MCS; Short=MOS; Short=MoCo sulfurase; AltName: Full=Molybdenum cofactor sulfurtransferase [Solanum lycopersicum]
853	Bni03T004665	1817	2121	2156	798	498	133.34	152.63	162.82	55.16	42.61	149.597	48.885	-1.6136	2.68e-17	1.38e-15	Down	Full=Monocopper oxidase-like protein SKS1; Flags: Precursor [Arabidopsis thaliana]
3326	Bni13T017845	405	325	313	145	66	29.72	23.39	23.64	10.02	5.65	25.5833	7.835	-1.7072	4.37e-07	4.7e-06	Down	Full=Monogalactosyldiacylglycerol synthase 2, chloroplastic; Short=AtMGD2; AltName: Full=MGDG synthase type B; Flags: Precursor [Arabidopsis thaliana]
3231	Bni12T017307	137	148	122	324	311	10.05	10.65	9.21	22.4	26.61	9.97	24.505	1.2974	5.54e-08	7.19e-07	Up	Full=Monosaccharide-sensing protein 2; AltName: Full=Sugar transporter MSSP2 [Arabidopsis thaliana]
1717	Bni06T009000	628	628	618	298	177	46.09	45.19	46.67	20.6	15.14	45.9833	17.87	-1.3636	1.11e-10	2.29e-09	Down	Full=Monothiol glutaredoxin-S12, chloroplastic; Short=AtGrxS12; Flags: Precursor [Arabidopsis thaliana]
2080	Bni07T010899	377	391	450	171	94	27.67	28.14	33.98	11.82	8.04	29.93	9.93	-1.5917	3.54e-09	5.77e-08	Down	Full=MORC family CW-type zinc finger protein 4; AltName: Full=Zinc finger CW-type coiled-coil domain protein 2 [Mus musculus]
1024	Bni04T005542	1027	1062	802	21	12	75.37	76.42	60.57	1.45	1.03	70.7867	1.24	-5.8351	2.83e-67	2.57e-64	Down	Full=mRNA decay activator protein ZFP36L2; AltName: Full=Zinc finger protein 36, C3H1 type-like 2 [Xenopus tropicalis]
2401	Bni09T012755	205	187	181	437	672	15.04	13.46	13.67	30.21	57.5	14.0567	43.855	1.6415	1.43e-06	1.35e-05	Up	Full=Multicopper oxidase LPR2; AltName: Full=Protein LOW PHOSPHATE ROOT 2; Flags: Precursor [Arabidopsis thaliana]
610	Bni02T003373	903	875	962	246	187	66.27	62.97	72.65	17	16	67.2967	16.5	-2.0281	4.58e-32	8.61e-30	Down	Full=Multifunctional CCA protein; Includes: RecName: Full=CCA-adding enzyme; AltName: Full=CCA tRNA nucleotidyltransferase; AltName: Full=tRNA CCA-pyrophosphorylase; AltName: Full=tRNA adenylyl-/cytidylyl-transferase; AltName: Full=tRNA nucleotidyltransferase; AltName: Full=tRNA-NT; Includes: RecName: Full=2'-nucleotidase; Includes: RecName: Full=2',3'-cyclic phosphodiesterase; Includes: RecName:…
808	Bni03T004485	2052	2041	2056	973	568	150.59	146.87	155.27	67.26	48.6	150.91	57.93	-1.3813	8.24e-13	2.42e-11	Down	Full=Multiple inositol polyphosphate phosphatase 1; Short=Ddmipp1; AltName: Full=2,3-bisphosphoglycerate 3-phosphatase; Short=2,3-BPG phosphatase; AltName: Full=Inositol (1,3,4,5)-tetrakisphosphate 3-phosphatase; Short=Ins(1,3,4,5)P(4) 3-phosphatase; Flags: Precursor [Dictyostelium discoideum]
1827	Bni06T009561	184	189	167	538	418	13.5	13.6	12.61	37.19	35.77	13.2367	36.48	1.4626	1.08e-14	4.09e-13	Up	Full=Myb family transcription factor PHL13; AltName: Full=Protein PHR1-LIKE 13 [Arabidopsis thaliana]
910	Bni03T004905	61	67	55	193	86	4.48	4.82	4.15	13.34	7.36	4.48333	10.35	1.207	0.00253205	0.0096804	Up	Full=MYB-like transcription factor ETC1; AltName: Full=Protein ENHANCER OF TRY AND CPC 1 [Arabidopsis thaliana]
2674	Bni10T014261	121	101	52	159	627	8.88	7.27	3.93	10.99	53.65	6.69333	32.32	2.2716	0.000743175	0.0033951	Up	Full=Myb-related protein 305 [Antirrhinum majus]
219	Bni01T001246	43	36	41	119	70	3.16	2.59	3.1	8.23	5.99	2.95	7.11	1.2691	0.00107698	0.0046823	Up	Full=Myb-related protein Hv1 [Hordeum vulgare]
1029	Bni04T005580	176	118	121	488	200	12.92	8.49	9.14	33.73	17.11	10.1833	25.42	1.3198	0.000995925	0.00437503	Up	Full=Myb-related protein Hv1 [Hordeum vulgare]
2007	Bni07T010568	595	824	701	274	164	43.67	59.3	52.94	18.94	14.03	51.97	16.485	-1.6565	2.28e-11	5.32e-10	Down	Full=MYG1 exonuclease; Flags: Precursor [Homo sapiens]
1734	Bni06T009120	89	26	1	0	2	6.53	1.87	0.08	0	0.17	2.82667	0.085	-5.0555	0.0056154	0.0191879	Down	Full=Myosin-9; AltName: Full=Myosin XI C; Short=AtXIC [Arabidopsis thaliana]
850	Bni03T004658	38	73	132	744	260	2.79	5.25	9.97	51.43	22.25	6.00333	36.84	2.6174	7.34e-06	5.91e-05	Up	Full=Myrcene synthase, chloroplastic; Flags: Precursor [Quercus ilex]
1687	Bni06T008848	17	27	32	1	7	1.25	1.94	2.42	0.07	0.6	1.87	0.335	-2.4808	0.0135907	0.0395806	Down	Full=Myrcene synthase, chloroplastic; Flags: Precursor [Quercus ilex]
2524	Bni09T013455	266	164	93	302	577	19.52	11.8	7.02	20.88	49.37	12.78	35.125	1.4586	0.00748839	0.0242314	Up	Full=NAC domain-containing protein 1; Short=SlNAP1 [Solanum lycopersicum]
2021	Bni07T010600	16	9	6	14	103	1.17	0.65	0.45	0.97	8.81	0.756667	4.89	2.6921	0.00868733	0.0274376	Up	Full=NAC domain-containing protein 12; Short=ANAC012; AltName: Full=Protein NAC SECONDARY WALL THICKENING PROMOTING 3; AltName: Full=Protein SECONDARY WALL-ASSOCIATED NAC DOMAIN PROTEIN 1 [Arabidopsis thaliana]
3274	Bni13T017596	83	58	23	0	0	6.09	4.17	1.74	0	0	4	0.001	-11.9658	7.78e-07	7.85e-06	Down	Full=NAC domain-containing protein 45 [Arabidopsis thaliana]
2326	Bni08T012266	338	355	214	761	712	24.8	25.55	16.16	52.6	60.92	22.17	56.76	1.3563	1.7e-06	1.59e-05	Up	Full=NAC domain-containing protein 48; Short=ONAC048; AltName: Full=OsNAC6; AltName: Full=Protein STRESS-RESPONSIVE NAC 2 [Oryza sativa Japonica Group]
1665	Bni06T008726	110	106	67	187	247	8.07	7.63	5.06	12.93	21.13	6.92	17.03	1.2992	0.000971956	0.0042839	Up	Full=NAC domain-containing protein 6; Short=GmNAC6 [Glycine max]
205	Bni01T001172	182	165	133	528	530	13.36	11.87	10.04	36.5	45.35	11.7567	40.925	1.7995	1.47e-12	4.14e-11	Up	Full=NAC domain-containing protein 68; Short=ONAC068; AltName: Full=OsNAC4 [Oryza sativa Japonica Group]
1587	Bni05T008238	189	163	62	0	0	13.87	11.73	4.68	0	0	10.0933	0.001	-13.3011	1.63e-09	2.82e-08	Down	Full=NAC domain-containing protein 76; Short=ANAC076; AltName: Full=Protein VASCULAR RELATED NAC-DOMAIN 2 [Arabidopsis thaliana]
3207	Bni12T017198	112	92	47	0	0	8.22	6.62	3.55	0	0	6.13	0.001	-12.5817	2.12e-08	2.99e-07	Down	Full=NAC domain-containing protein 76; Short=ANAC076; AltName: Full=Protein VASCULAR RELATED NAC-DOMAIN 2 [Arabidopsis thaliana]
2045	Bni07T010701	76	56	26	0	0	5.58	4.03	1.96	0	0	3.85667	0.001	-11.9131	6.08e-07	6.35e-06	Down	Full=NAC domain-containing protein JA2; AltName: Full=Protein JASMONIC ACID 2 [Solanum lycopersicum]
2464	Bni09T013122	73	70	23	0	0	5.36	5.04	1.74	0	0	4.04667	0.001	-11.9825	6.44e-07	6.67e-06	Down	Full=NAC transcription factor 32; AltName: Full=NAC domain-containing protein 32; Short=ANAC032 [Arabidopsis thaliana]
2327	Bni08T012269	1152	811	353	133	210	84.54	58.36	26.66	9.19	17.97	56.52	13.58	-2.0573	0.00010171	0.000604141	Down	Full=NAC transcription factor NAM-B2; Short=TtNAM-B2 [Triticum turgidum subsp. durum]
995	Bni04T005410	780	725	604	225	142	57.24	52.17	45.61	15.55	12.15	51.6733	13.85	-1.8995	2.14e-16	1.03e-14	Down	Full=N-acetyltransferase 9-like protein [Nematostella vectensis]
3047	Bni12T016315	8	12	30	101	64	0.59	0.86	2.27	6.98	5.48	1.24	6.23	2.3289	0.000683563	0.0031511	Up	Full=NAD(P)H-quinone oxidoreductase chain 4, chloroplastic; AltName: Full=NAD(P)H dehydrogenase, chain 4; AltName: Full=NADH-plastoquinone oxidoreductase chain 4 [Morus indica]
3051	Bni12T016323	8	12	30	101	64	0.59	0.86	2.27	6.98	5.48	1.24	6.23	2.3289	0.000683563	0.0031511	Up	Full=NAD(P)H-quinone oxidoreductase chain 4, chloroplastic; AltName: Full=NAD(P)H dehydrogenase, chain 4; AltName: Full=NADH-plastoquinone oxidoreductase chain 4 [Morus indica]
3046	Bni12T016314	2	7	18	69	30	0.15	0.5	1.36	4.77	2.57	0.67	3.67	2.4535	0.00987217	0.0304504	Up	Full=NAD(P)H-quinone oxidoreductase subunit 1, chloroplastic; AltName: Full=NAD(P)H dehydrogenase subunit 1; Short=NDH subunit 1; AltName: Full=NADH-plastoquinone oxidoreductase subunit 1 [Morus indica]
3053	Bni12T016330	10	14	25	94	24	0.73	1.01	1.89	6.5	2.05	1.21	4.275	1.8209	0.017913	0.0495692	Up	Full=NAD(P)H-quinone oxidoreductase subunit 2 A, chloroplastic; AltName: Full=NAD(P)H dehydrogenase, subunit 2 A; AltName: Full=NADH-plastoquinone oxidoreductase subunit 2 A [Morus indica] >P0CC93.1 RecName: Full=NAD(P)H-quinone oxidoreductase subunit 2 B, chloroplastic; AltName: Full=NAD(P)H dehydrogenase, subunit 2 B; AltName: Full=NADH-plastoquinone oxidoreductase subunit 2 B [Morus indica]
3052	Bni12T016324	4	8	26	138	45	0.29	0.58	1.96	9.54	3.85	0.943333	6.695	2.8272	0.00139553	0.00582498	Up	Full=NAD(P)H-quinone oxidoreductase subunit 5, chloroplastic; AltName: Full=NAD(P)H dehydrogenase subunit 5; AltName: Full=NADH-plastoquinone oxidoreductase subunit 5 [Morus indica]
3050	Bni12T016322	24	41	118	313	128	1.76	2.95	8.91	21.64	10.95	4.54	16.295	1.8437	0.00916165	0.0286451	Up	Full=NAD(P)H-quinone oxidoreductase subunit H, chloroplastic; AltName: Full=NAD(P)H dehydrogenase subunit H; AltName: Full=NADH-plastoquinone oxidoreductase 49 kDa subunit; AltName: Full=NADH-plastoquinone oxidoreductase subunit H [Morus indica]
220	Bni01T001247	185	225	257	405	649	13.58	16.19	19.41	28	55.53	16.3933	41.765	1.3492	0.000226637	0.00121612	Up	Full=NAD(P)H-quinone oxidoreductase subunit U, chloroplastic; AltName: Full=NAD(P)H dehydrogenase subunit U; Short=NDH subunit U; AltName: Full=NADH-plastoquinone oxidoreductase subunit U; AltName: Full=Protein CHLORORESPIRATORY REDUCTION L; Flags: Precursor [Arabidopsis thaliana]
3431	Bni13T018285	1832	1289	903	432	261	134.45	92.76	68.19	29.86	22.33	98.4667	26.095	-1.9159	2.91e-08	3.97e-07	Down	Full=NAD-dependent protein deacetylase SRT1; AltName: Full=Regulatory protein SIR2 homolog 1; AltName: Full=SIR2-like protein 1 [Arabidopsis thaliana]
1866	Bni06T009729	2580	2380	2194	1158	726	189.34	171.27	165.69	80.05	62.12	175.433	71.085	-1.3033	2.13e-12	5.86e-11	Down	Full=NADH dehydrogenase [ubiquinone] 1 beta subcomplex subunit 9; AltName: Full=B22 subunit of eukaryotic mitochondrial complex I; AltName: Full=Complex I-B22; Short=AtCIB22; Short=CI-B22; AltName: Full=NADH-ubiquinone oxidoreductase B22 subunit [Arabidopsis thaliana]
2297	Bni08T012106	3186	3342	3054	5392	14685	233.81	240.49	230.64	372.72	1256.49	234.98	814.605	1.7936	7.07e-05	0.000441291	Up	Full=NADP-dependent malic enzyme; Short=NADP-ME [Vitis vinifera]
3065	Bni12T016407	25	20	19	68	56	1.83	1.44	1.43	4.7	4.79	1.56667	4.745	1.5987	0.000543841	0.00259067	Up	Full=NADPH-dependent 1-acyldihydroxyacetone phosphate reductase; Short=ADR; AltName: Full=1-acyl DHAP reductase; AltName: Full=Acyl/alkyl DHAP reductase; AltName: Full=Acylglycerone-phosphate reductase; AltName: Full=Triacylglycerol lipase ayr1; Short=TAG lipase [Schizosaccharomyces pombe 972h-]
975	Bni04T005319	74	90	122	825	358	5.43	6.48	9.21	57.03	30.63	7.04	43.83	2.6383	6.43e-12	1.64e-10	Up	Full=NADPH-dependent oxidoreductase 2-alkenal reductase; Short=AtAER; AltName: Full=NADP-dependent alkenal double bond reductase P1; Short=DBR1; AltName: Full=NADPH-azodicarbonyl/quinone reductase; AltName: Full=NADPH:2-alkenal/one alpha,beta-hydrogenase; Short=ALH; AltName: Full=P1-zeta-crystallin protein; Short=P1-ZCr [Arabidopsis thaliana]
487	Bni02T002710	2912	3389	3729	1373	1303	213.7	243.87	281.62	94.91	111.49	246.397	103.2	-1.2555	3.4e-11	7.71e-10	Down	Full=Nardilysin-like; AltName: Full=N-arginine dibasic convertase-like; Short=NRD convertase-like; Short=NRD-C [Arabidopsis thaliana]
3169	Bni12T016984	1822	1683	1085	2265	5154	133.71	121.11	81.94	156.57	440.99	112.253	298.78	1.4123	0.00149823	0.00618815	Up	Full=NDR1/HIN1-like protein 1 [Arabidopsis thaliana]
3187	Bni12T017066	1426	1097	873	1	3	104.65	78.94	65.93	0.07	0.26	83.1733	0.165	-8.9775	1.82e-31	3.18e-29	Down	Full=NDR1/HIN1-like protein 10; Short=AtNHL10; AltName: Full=Protein YELLOW-LEAF-SPECIFIC GENE 9 [Arabidopsis thaliana]
928	Bni03T005019	78	116	118	232	337	5.72	8.35	8.91	16.04	28.83	7.66	22.435	1.5503	6.67e-05	0.000418892	Up	Full=NDR1/HIN1-like protein 26 [Arabidopsis thaliana]
3170	Bni12T016986	237	251	237	486	449	17.39	18.06	17.9	33.59	38.42	17.7833	36.005	1.0177	8.33e-08	1.03e-06	Up	Full=NDR1/HIN1-like protein 3 [Arabidopsis thaliana]
1498	Bni05T007790	49	61	53	0	0	3.6	4.39	4	0	0	3.99667	0.001	-11.9646	1.05e-07	1.28e-06	Down	Full=NEDD8-activating enzyme E1 regulatory subunit AXR1; AltName: Full=Auxin-resistance protein AXR1; AltName: Full=Protein AUXIN-RESISTANT 1 [Arabidopsis thaliana]
647	Bni03T003633	173	167	169	364	1636	12.7	12.02	12.76	25.16	139.98	12.4933	82.57	2.7245	8.09e-06	6.43e-05	Up	Full=Nematode resistance protein-like HSPRO2; AltName: Full=AKINbetagamma-interacting protein 2; AltName: Full=Ortholog of sugar beet HS1 PRO-1 protein 2; AltName: Full=Protein Hs1pro-2 [Arabidopsis thaliana]
2761	Bni10T014630	11	19	18	0	0	0.81	1.37	1.36	0	0	1.18	0.001	-10.2046	0.000244075	0.00129384	Down	Full=NEP1-interacting protein-like 1; AltName: Full=RING-H2 finger protein ATL27 [Arabidopsis thaliana]
204	Bni01T001169	1209	993	558	169	318	88.73	71.46	42.14	11.68	27.21	67.4433	19.445	-1.7943	0.000120656	0.000703607	Down	Full=N-glycosylase/DNA lyase OGG1; Includes: RecName: Full=8-oxoguanine DNA glycosylase 1; Short=AtOGG1; Includes: RecName: Full=DNA-(apurinic or apyrimidinic site) lyase; Short=AP lyase [Arabidopsis thaliana]
3347	Bni13T017930	3553	3361	3459	898	1019	260.75	241.86	261.22	62.07	87.19	254.61	74.63	-1.7705	1.53e-17	8.13e-16	Down	Full=NHP2-like protein 1; AltName: Full=High mobility group-like nuclear protein 2 homolog 1; AltName: Full=OTK27; AltName: Full=SNU13 homolog; Short=hSNU13; AltName: Full=U4/U6.U5 small nuclear ribonucleoprotein SNU13; AltName: Full=U4/U6.U5 tri-snRNP 15.5 kDa protein; Contains: RecName: Full=NHP2-like protein 1, N-terminally processed [Homo sapiens] >P55770.4 RecName: Full=NHP2-like protein 1; …
947	Bni04T005192	35	29	18	5	4	2.57	2.09	1.36	0.35	0.34	2.00667	0.345	-2.5401	0.00179539	0.00721205	Down	Full=Nicotianamine aminotransferase 1; Short=OsNAAT1 [Oryza sativa Japonica Group]
949	Bni04T005202	306	276	255	652	587	22.46	19.86	19.26	45.07	50.23	20.5267	47.65	1.215	4.98e-10	9.32e-09	Up	Full=Nicotianamine aminotransferase A; AltName: Full=Nicotianamine aminotransferase III; Short=NAAT-III [Hordeum vulgare]
1875	Bni06T009826	969	859	664	1356	2085	71.11	61.81	50.15	93.73	178.4	61.0233	136.065	1.1569	0.000519432	0.00248674	Up	Full=Nicotinamidase 1; Short=AtNIC1; AltName: Full=Nicotinamide deamidase 1 [Arabidopsis thaliana]
1606	Bni06T008390	34	37	29	0	0	2.5	2.66	2.19	0	0	2.45	0.001	-11.2586	2.55e-06	2.29e-05	Down	Full=NifU-like protein 1, chloroplastic; Short=AtCNfu1; Short=AtCnfU-IVb; Flags: Precursor [Arabidopsis thaliana]
3266	Bni13T017546	111	140	122	273	239	8.15	10.07	9.21	18.87	20.45	9.14333	19.66	1.1045	4.65e-06	3.93e-05	Up	Full=NifU-like protein 3, chloroplastic; Short=AtCNfu3; Short=AtCnfU-IVa; Flags: Precursor [Arabidopsis thaliana]
355	Bni01T001858	165	191	266	589	319	12.11	13.74	20.09	40.71	27.29	15.3133	34	1.1507	0.000438128	0.00214142	Up	Full=Nitrate regulatory gene2 protein; Short=NRG2 protein [Arabidopsis thaliana]
1117	Bni04T005973	57	63	60	153	231	4.18	4.53	4.53	10.58	19.77	4.41333	15.175	1.7818	7.95e-06	6.34e-05	Up	Full=Nitrile-specifier protein 2; Short=AtNSP2; AltName: Full=Jacalin-related lectin 21 [Arabidopsis thaliana]
3314	Bni13T017777	17	16	14	1	0	1.25	1.15	1.06	0.07	0	1.15333	0.035	-5.0423	0.00278998	0.010529	Down	Full=Nod factor hydrolase protein 1; Short=MtNFH1; AltName: Full=Class V chitinase NFH1; AltName: Full=Mtchit5; Flags: Precursor [Medicago truncatula]
3511	Bni14T018782	154	149	153	242	708	11.3	10.72	11.55	16.73	60.58	11.19	38.655	1.7884	0.000630365	0.00294756	Up	Full=Nodulation receptor kinase; AltName: Full=Does not make infections protein 2; AltName: Full=MtSYMRK; AltName: Full=Symbiosis receptor-like kinase; Flags: Precursor [Medicago truncatula]
3512	Bni14T018783	708	804	664	1639	1253	51.96	57.86	50.15	113.29	107.21	53.3233	110.25	1.0479	3.74e-12	9.87e-11	Up	Full=Nodulation receptor kinase; Flags: Precursor [Pisum sativum]
2514	Bni09T013411	329	376	483	1195	528	24.14	27.06	36.48	82.6	45.18	29.2267	63.89	1.1283	0.000693138	0.00319099	Up	Full=Nodulin-related protein 1; Short=AtNRP1; AltName: Full=RPS2-interacting protein 11 [Arabidopsis thaliana]
2604	Bni09T013838	3474	3487	3323	12720	4913	254.95	250.93	250.95	879.26	420.37	252.277	649.815	1.365	1.21e-05	9.23e-05	Up	Full=Non-specific lipid transfer protein GPI-anchored 1; Short=AtLTPG-1; Short=Protein LTP-GPI-ANCHORED 1; Flags: Precursor [Arabidopsis thaliana]
2095	Bni07T011014	2626	2528	3336	9448	2881	192.72	181.92	251.94	653.08	246.51	208.86	449.795	1.1067	0.0052232	0.0180513	Up	Full=Non-specific lipid-transfer protein 1; Short=LTP 1; AltName: Allergen=Mor n 3 [Morus nigra]
2096	Bni07T011016	915	946	1186	4357	3135	67.15	68.07	89.57	301.17	268.24	74.93	284.705	1.9259	5.94e-24	5.76e-22	Up	Full=Non-specific lipid-transfer protein 1; Short=LTP 1; AltName: Allergen=Mor n 3 [Morus nigra]
2097	Bni07T011020	69	136	165	1178	976	5.06	9.79	12.46	81.43	83.51	9.10333	82.47	3.1794	1.38e-17	7.43e-16	Up	Full=Non-specific lipid-transfer protein 1; Short=LTP 1; AltName: Allergen=Mor n 3 [Morus nigra]
2098	Bni07T011021	3	5	11	98	60	0.22	0.36	0.83	6.77	5.13	0.47	5.95	3.6622	1.26e-07	1.51e-06	Up	Full=Non-specific lipid-transfer protein 1; Short=LTP 1; AltName: Allergen=Mor n 3 [Morus nigra]
1022	Bni04T005530	536	436	154	5	5	39.34	31.37	11.63	0.35	0.43	27.4467	0.39	-6.137	5.55e-18	3.16e-16	Down	Full=Non-specific lipid-transfer protein 2; AltName: Full=Allergen Api g 6.0101; AltName: Allergen=Api g 6 [Apium graveolens Rapaceum Group]
1020	Bni04T005527	163	214	209	1029	805	11.96	15.4	15.78	71.13	68.88	14.38	70.005	2.2834	1.15e-29	1.77e-27	Up	Full=Non-specific lipid-transfer protein 2; Short=LTP 2 [Prunus armeniaca]
2972	Bni11T015840	21	9	3	21	227	1.54	0.65	0.23	1.45	19.42	0.806667	10.435	3.6933	0.000982141	0.00432438	Up	Full=Non-specific lipid-transfer protein 3; Short=LTP 3; Flags: Precursor [Oryza sativa Indica Group] >Q2QYL3.1 RecName: Full=Non-specific lipid-transfer protein 3; Short=LTP 3; Flags: Precursor [Oryza sativa Japonica Group]
2094	Bni07T011013	722	846	898	5505	2121	52.99	60.88	67.82	380.53	181.48	60.5633	281.005	2.2141	1.71e-11	4.07e-10	Up	Full=Non-specific lipid-transfer protein 3; Short=LTP 3; Flags: Precursor [Prunus dulcis]
427	Bni02T002423	111	129	149	464	1948	8.15	9.28	11.25	32.07	166.68	9.56	99.375	3.3778	1.85e-08	2.63e-07	Up	Full=Non-specific phospholipase C2; Flags: Precursor [Arabidopsis thaliana]
28	Bni01T000227	22	14	4	22	186	1.61	1.01	0.3	1.52	15.91	0.973333	8.715	3.1625	0.0027484	0.0103994	Up	Full=Non-specific phospholipase C5 [Arabidopsis thaliana]
2814	Bni10T014879	98	119	133	407	367	7.19	8.56	10.04	28.13	31.4	8.59667	29.765	1.7918	9.64e-13	2.79e-11	Up	Full=Non-specific phospholipase C6; Flags: Precursor [Arabidopsis thaliana]
636	Bni02T003538	129	116	126	15	9	9.47	8.35	9.52	1.04	0.77	9.11333	0.905	-3.332	2.33e-14	8.42e-13	Down	Full=Non-structural maintenance of chromosomes element 4 homolog A; Short=Non-SMC element 4 homolog A [Arabidopsis thaliana]
44	Bni01T000365	277	370	373	167	141	20.33	26.63	28.17	11.54	12.06	25.0433	11.8	-1.0856	1.82e-05	0.000132642	Down	Full=Nuclear intron maturase 2, mitochondrial; Short=AtnMat2; AltName: Full=Nuclear intron maturase 1 b; Short=AtnMat1b; Flags: Precursor [Arabidopsis thaliana]
2688	Bni10T014325	134	109	51	1	14	9.83	7.84	3.85	0.07	1.2	7.17333	0.635	-3.4978	0.000184501	0.00102004	Down	Full=Nuclear poly(A) polymerase 1; Short=PAP(I); Short=Poly(A) polymerase I; AltName: Full=Polynucleotide adenylyltransferase 1 [Arabidopsis thaliana]
3296	Bni13T017693	371	462	573	240	197	27.23	33.25	43.27	16.59	16.86	34.5833	16.725	-1.0481	0.000122442	0.000712579	Down	Full=Nuclear pore complex protein NUP43; AltName: Full=Nucleoporin 43 [Arabidopsis thaliana]
800	Bni03T004440	1197	1423	1688	682	396	87.84	102.4	127.48	47.14	33.88	105.907	40.51	-1.3864	3.33e-08	4.48e-07	Down	Full=Nuclear pore complex protein NUP88; AltName: Full=Nucleoporin 88; AltName: Full=Protein EMBRYO DEFECTIVE 2789; AltName: Full=Protein MODIFIER OF SNC1,7 [Arabidopsis thaliana]
621	Bni02T003460	939	974	877	1673	2183	68.91	70.09	66.23	115.64	186.78	68.41	151.21	1.1443	6.38e-06	5.2e-05	Up	Full=Nuclear transcription factor Y subunit alpha; AltName: Full=CAAT box DNA-binding protein subunit A; AltName: Full=Nuclear transcription factor Y subunit A; Short=NF-YA [Dictyostelium discoideum]
2272	Bni08T011948	266	237	237	450	653	19.52	17.05	17.9	31.11	55.87	18.1567	43.49	1.2602	7.83e-05	0.000482377	Up	Full=Nuclear transcription factor Y subunit alpha; AltName: Full=CAAT box DNA-binding protein subunit A; AltName: Full=Nuclear transcription factor Y subunit A; Short=NF-YA [Dictyostelium discoideum]
704	Bni03T003939	431	520	368	163	73	31.63	37.42	27.79	11.27	6.25	32.28	8.76	-1.8816	1.8e-08	2.58e-07	Down	Full=Nuclear transcription factor Y subunit B; Short=NF-YB; AltName: Full=CAAT box DNA-binding protein subunit B [Zea mays]
1118	Bni04T005975	79	50	64	104	267	5.8	3.6	4.83	7.19	22.85	4.74333	15.02	1.6629	0.00350736	0.0128271	Up	Full=Nuclear transcription factor Y subunit B-3; AltName: Full=OsNF-YB-3; AltName: Full=Transcriptional activator HAP3B [Oryza sativa Japonica Group]
1469	Bni05T007637	65	64	54	127	529	4.77	4.61	4.08	8.78	45.26	4.48667	27.02	2.5903	6.35e-05	0.000400577	Up	Full=Nuclear transcription factor Y subunit B-3; AltName: Full=OsNF-YB-3; AltName: Full=Transcriptional activator HAP3B [Oryza sativa Japonica Group]
1699	Bni06T008903	4343	4668	4897	1792	1065	318.72	335.91	369.82	123.87	91.12	341.483	107.495	-1.6675	9.93e-19	6.17e-17	Down	Full=Nuclear transport factor 2; Short=AtNTF2 [Arabidopsis thaliana]
1546	Bni05T008012	378	413	448	1453	689	27.74	29.72	33.83	100.44	58.95	30.43	79.695	1.389	6.81e-07	6.99e-06	Up	Full=Nucleobase-ascorbate transporter 2; Short=AtNAT2 [Arabidopsis thaliana]
289	Bni01T001555	635	664	612	1331	1500	46.6	47.78	46.22	92	128.34	46.8667	110.17	1.2331	6.41e-09	9.96e-08	Up	Full=Nucleobase-ascorbate transporter 3; Short=AtNAT3 [Arabidopsis thaliana]
1799	Bni06T009414	752	736	796	212	84	55.19	52.96	60.11	14.65	7.19	56.0867	10.92	-2.3607	5.85e-13	1.75e-11	Down	Full=Nucleobase-ascorbate transporter 4; Short=AtNAT4; Short=AtPER [Arabidopsis thaliana]
2552	Bni09T013610	207	278	257	535	656	15.19	20	19.41	36.98	56.13	18.2	46.555	1.355	1.75e-06	1.63e-05	Up	Full=Nucleobase-ascorbate transporter 6; Short=AtNAT6 [Arabidopsis thaliana]
285	Bni01T001526	339	298	273	16	24	24.88	21.44	20.62	1.11	2.05	22.3133	1.58	-3.8199	3.1e-25	3.39e-23	Down	Full=Nucleoid-associated protein At4g30620, chloroplastic; Flags: Precursor [Arabidopsis thaliana]
3438	Bni13T018310	338	312	217	79	39	24.8	22.45	16.39	5.46	3.34	21.2133	4.4	-2.2694	6.29e-10	1.15e-08	Down	Full=Nucleotide-sugar uncharacterized transporter 2 [Arabidopsis thaliana]
1270	Bni05T006724	330	287	343	899	398	24.22	20.65	25.9	62.14	34.05	23.59	48.095	1.0277	0.00105347	0.0045928	Up	Full=Nudix hydrolase 15, mitochondrial; Short=AtNUDT15; AltName: Full=Coenzyme A diphosphatase NUDT15; Flags: Precursor [Arabidopsis thaliana]
1943	Bni07T010195	2	1	3	26	31	0.15	0.07	0.23	1.8	2.65	0.15	2.225	3.8908	8.52e-05	0.000518967	Up	Full=Nudix hydrolase 15, mitochondrial; Short=AtNUDT15; AltName: Full=Coenzyme A diphosphatase NUDT15; Flags: Precursor [Arabidopsis thaliana]
3097	Bni12T016614	328	281	225	61	21	24.07	20.22	16.99	4.22	1.8	20.4267	3.01	-2.7626	1.22e-10	2.49e-09	Down	Full=Nudix hydrolase 16, mitochondrial; Short=AtNUDT16; Flags: Precursor [Arabidopsis thaliana]
547	Bni02T003000	49	47	56	14	7	3.6	3.38	4.23	0.97	0.6	3.73667	0.785	-2.251	6.69e-05	0.000420201	Down	Full=Nudix hydrolase 9; Short=AtNUDT9 [Arabidopsis thaliana]
1815	Bni06T009509	113	64	70	185	198	8.29	4.61	5.29	12.79	16.94	6.06333	14.865	1.2937	0.00109657	0.00475787	Up	Full=O-acyltransferase WSD1; AltName: Full=Diacylglycerol O-acyltransferase; Short=DGAT; AltName: Full=Long-chain-alcohol O-fatty-acyltransferase; AltName: Full=Wax synthase; Short=WS [Arabidopsis thaliana]
2216	Bni08T011715	948	861	639	2369	1319	69.57	61.96	48.26	163.75	112.86	59.93	138.305	1.2065	5.14e-06	4.28e-05	Up	Full=O-acyltransferase WSD1; AltName: Full=Diacylglycerol O-acyltransferase; Short=DGAT; AltName: Full=Long-chain-alcohol O-fatty-acyltransferase; AltName: Full=Wax synthase; Short=WS [Arabidopsis thaliana]
59	Bni01T000466	309	380	348	1040	644	22.68	27.34	26.28	71.89	55.1	25.4333	63.495	1.3199	3.09e-10	5.92e-09	Up	Full=O-fucosyltransferase 10; Short=O-FucT-10; AltName: Full=O-fucosyltransferase family protein [Arabidopsis thaliana]
703	Bni03T003935	76	85	35	0	0	5.58	6.12	2.64	0	0	4.78	0.001	-12.2228	1.12e-07	1.35e-06	Down	Full=O-fucosyltransferase 19; Short=O-FucT-19; AltName: Full=O-fucosyltransferase family protein [Arabidopsis thaliana]
3251	Bni13T017456	774	778	700	356	232	56.8	55.98	52.86	24.61	19.85	55.2133	22.23	-1.3125	2.59e-12	7.05e-11	Down	Full=O-fucosyltransferase 20; Short=O-FucT-20; AltName: Full=O-fucosyltransferase family protein [Arabidopsis thaliana]
1369	Bni05T007171	175	144	65	52	49	12.84	10.36	4.91	3.59	4.19	9.37	3.89	-1.2683	0.0155103	0.044089	Down	Full=O-fucosyltransferase 23; Short=O-FucT-23; AltName: Full=O-fucosyltransferase family protein [Arabidopsis thaliana]
109	Bni01T000766	1746	1529	1340	593	345	128.13	110.03	101.2	40.99	29.52	113.12	35.255	-1.682	3.12e-13	9.69e-12	Down	Full=O-fucosyltransferase 31; Short=O-FucT-31; AltName: Full=O-fucosyltransferase family protein [Arabidopsis thaliana]
2807	Bni10T014842	1299	921	383	30	37	95.33	66.28	28.92	2.07	3.17	63.51	2.62	-4.5993	5.41e-18	3.09e-16	Down	Full=O-fucosyltransferase 37; Short=O-FucT-37; AltName: Full=O-fucosyltransferase family protein [Arabidopsis thaliana]
885	Bni03T004794	144	99	75	206	360	10.57	7.12	5.66	14.24	30.8	7.78333	22.52	1.5327	0.00119361	0.00510578	Up	Full=O-glucosyltransferase rumi homolog; Flags: Precursor [Culex quinquefasciatus]
1261	Bni05T006636	552	320	6	2	1	40.51	23.03	0.45	0.14	0.09	21.33	0.115	-7.5351	6.69e-05	0.00041974	Down	Full=Olee1-like protein; Flags: Precursor [Betula pendula]
2620	Bni10T013947	18	18	4	1	0	1.32	1.3	0.3	0.07	0	0.973333	0.035	-4.7975	0.0106715	0.032475	Down	Full=Oleosin [Lilium longiflorum]
839	Bni03T004609	236	185	81	12	10	17.32	13.31	6.12	0.83	0.86	12.25	0.845	-3.8577	2.88e-10	5.54e-09	Down	Full=Oleosin 1 [Prunus dulcis]
1220	Bni04T006421	5	5	6	83	26	0.37	0.36	0.45	5.74	2.22	0.393333	3.98	3.3389	1.76e-05	0.000128509	Up	Full=Oleosin 18.2 kDa [Gossypium hirsutum]
1470	Bni05T007640	1277	1503	1337	2155	4763	93.72	108.16	100.97	148.96	407.54	100.95	278.25	1.4627	0.000278355	0.00145258	Up	Full=Oligopeptide transporter 3; Short=AtOPT3 [Arabidopsis thaliana]
508	Bni02T002803	96	91	50	7	9	7.05	6.55	3.78	0.48	0.77	5.79333	0.625	-3.2125	1.94e-07	2.24e-06	Down	Full=Omega-3 fatty acid desaturase, endoplasmic reticulum; AltName: Full=Indole-3-acetic acid-induced protein ARG1 [Vigna radiata var. radiata]
1439	Bni05T007506	72	89	73	9	8	5.28	6.4	5.51	0.62	0.68	5.73	0.65	-3.14	1.47e-09	2.56e-08	Down	Full=Omega-amidase, chloroplastic; AltName: Full=Nitrilase-like protein 3; Flags: Precursor [Arabidopsis thaliana]
697	Bni03T003903	164	187	183	53	42	12.04	13.46	13.82	3.66	3.59	13.1067	3.625	-1.8542	1.43e-10	2.89e-09	Down	Full=Organelle RRM domain-containing protein 1, chloroplastic; Flags: Precursor [Arabidopsis thaliana]
780	Bni03T004344	22	15	19	199	207	1.61	1.08	1.43	13.76	17.71	1.37333	15.735	3.5182	6.95e-19	4.36e-17	Up	Full=Organic cation/carnitine transporter 3; Short=AtOCT3 [Arabidopsis thaliana]
625	Bni02T003475	566	674	712	386	176	41.54	48.5	53.77	26.68	15.06	47.9367	20.87	-1.1997	8.29e-05	0.000507052	Down	Full=Origin of replication complex subunit 1; Short=OsORC1 [Oryza sativa Japonica Group]
276	Bni01T001498	348	341	380	181	99	25.54	24.54	28.7	12.51	8.47	26.26	10.49	-1.3239	6.63e-07	6.83e-06	Down	Full=Origin of replication complex subunit 2; Short=AtORC2 [Arabidopsis thaliana]
350	Bni01T001827	318	241	55	1	1	23.34	17.34	4.15	0.07	0.09	14.9433	0.08	-7.5453	1.36e-09	2.38e-08	Down	Full=Ornithine decarboxylase; Short=ODC [Datura stramonium]
736	Bni03T004138	577	587	472	113	231	42.34	42.24	35.65	7.81	19.77	40.0767	13.79	-1.5391	0.000240975	0.00128151	Down	Full=OVARIAN TUMOR DOMAIN-containing deubiquitinating enzyme 4; Short=OTU domain-containing protein 4; AltName: Full=Deubiquitinating enzyme OTU4 [Arabidopsis thaliana]
921	Bni03T004981	30	51	47	0	0	2.2	3.67	3.55	0	0	3.14	0.001	-11.6165	7.75e-07	7.84e-06	Down	Full=OVARIAN TUMOR DOMAIN-containing deubiquitinating enzyme 7; Short=OTU domain-containing protein 7; AltName: Full=Deubiquitinating enzyme OTU7 [Arabidopsis thaliana]
922	Bni03T004983	6	5	13	0	0	0.44	0.36	0.98	0	0	0.593333	0.001	-9.2127	0.00799478	0.0255872	Down	Full=OVARIAN TUMOR DOMAIN-containing deubiquitinating enzyme 7; Short=OTU domain-containing protein 7; AltName: Full=Deubiquitinating enzyme OTU7 [Arabidopsis thaliana]
2125	Bni07T011171	1168	865	523	450	289	85.72	62.25	39.5	31.11	24.73	62.49	27.92	-1.1623	0.00171279	0.0069445	Down	Full=Oxalate--CoA ligase; AltName: Full=4-coumarate--CoA ligase isoform 8; Short=At4CL8; AltName: Full=4-coumarate--CoA ligase-like 10; AltName: Full=Acyl-activating enzyme 3; AltName: Full=Adenosine monophosphate binding protein 3; Short=AtMPBP3; AltName: Full=Oxalyl-CoA synthetase [Arabidopsis thaliana]
1090	Bni04T005871	1383	1604	1583	3431	2851	101.49	115.42	119.55	237.16	243.94	112.153	240.55	1.1009	8.36e-16	3.67e-14	Up	Full=Oxygen-evolving enhancer protein 2, chloroplastic; Short=OEE2; AltName: Full=23 kDa subunit of oxygen evolving system of photosystem II; AltName: Full=23 kDa thylakoid membrane protein; AltName: Full=OEC 23 kDa subunit; AltName: Full=OEC23; Flags: Precursor [Cucumis sativus]
3254	Bni13T017474	334	203	242	769	381	24.51	14.61	18.28	53.16	32.6	19.1333	42.88	1.1642	0.00077127	0.00351323	Up	Full=Oxysterol-binding protein-related protein 4B; AltName: Full=OSBP-related protein 4B [Arabidopsis thaliana]
3253	Bni13T017469	426	436	402	1304	676	31.26	31.37	30.36	90.14	57.84	30.9967	73.99	1.2552	3.14e-07	3.46e-06	Up	Full=Oxysterol-binding protein-related protein 4C; AltName: Full=OSBP-related protein 4C [Arabidopsis thaliana]
2917	Bni11T015551	56	31	11	0	0	4.11	2.23	0.83	0	0	2.39	0.001	-11.2228	2.64e-05	0.000183642	Down	Full=Paired amphipathic helix protein Sin3-like 1 [Arabidopsis thaliana]
2818	Bni10T014891	155	96	74	33	31	11.38	6.91	5.59	2.28	2.65	7.96	2.465	-1.6912	0.000612467	0.00287321	Down	Full=Palmitoyl-acyl carrier protein thioesterase, chloroplastic; AltName: Full=16:0-acyl-carrier protein thioesterase; Short=16:0-ACP thioesterase; AltName: Full=Acyl-[acyl-carrier-protein] hydrolase; AltName: Full=Acyl-acyl carrier protein thioesterase B1; Short=AtFATB1; Flags: Precursor [Arabidopsis thaliana]
279	Bni01T001506	560	408	302	1369	598	41.1	29.36	22.81	94.63	51.17	31.09	72.9	1.2295	0.00112143	0.00484164	Up	Full=Patatin-like protein 2; Short=AtPLP2; AltName: Full=Patatin-related phospholipase A IIalpha; Short=pPLAIIa; AltName: Full=Phospholipase A IIA; Short=AtPLAIIA [Arabidopsis thaliana]
3529	Bni14T018857	1386	1514	1621	5350	2725	101.71	108.95	122.42	369.81	233.16	111.027	301.485	1.4412	1.75e-09	3.01e-08	Up	Full=Patatin-like protein 2; Short=AtPLP2; AltName: Full=Patatin-related phospholipase A IIalpha; Short=pPLAIIa; AltName: Full=Phospholipase A IIA; Short=AtPLAIIA [Arabidopsis thaliana]
711	Bni03T003980	93	112	100	240	459	6.83	8.06	7.55	16.59	39.27	7.48	27.93	1.9007	9.14e-06	7.2e-05	Up	Full=Patatin-like protein 6; Short=AtPLP6; AltName: Full=Patatin-related phospholipase A IIIalpha; Short=pPLAIIIa; AltName: Full=Phospholipase A IIB; Short=AtPLAIIB [Arabidopsis thaliana]
1372	Bni05T007181	287	347	279	911	404	21.06	24.97	21.07	62.97	34.57	22.3667	48.77	1.1246	0.000307594	0.0015808	Up	Full=Patatin-like protein 6; Short=AtPLP6; AltName: Full=Patatin-related phospholipase A IIIalpha; Short=pPLAIIIa; AltName: Full=Phospholipase A IIB; Short=AtPLAIIB [Arabidopsis thaliana]
2431	Bni09T013002	41	36	2	0	3	3.01	2.59	0.15	0	0.26	1.91667	0.13	-3.882	0.0161624	0.0456449	Down	Full=Pathogenesis-related protein 1; Short=AtPRB1; Flags: Precursor [Arabidopsis thaliana]
3234	Bni12T017318	582	307	2	1	2	42.71	22.09	0.15	0.07	0.17	21.65	0.12	-7.4952	0.000354308	0.00178373	Down	Full=Pathogenesis-related protein 1A; Short=PR-1A; Flags: Precursor [Nicotiana tabacum]
3277	Bni13T017609	29	34	29	117	49	2.13	2.45	2.19	8.09	4.19	2.25667	6.14	1.444	0.00303568	0.0113221	Up	Full=Pathogenesis-related protein PR-1; Flags: Precursor [Medicago truncatula]
3609	BniUnT019308	54	73	69	13	9	3.96	5.25	5.21	0.9	0.77	4.80667	0.835	-2.5252	1.1e-06	1.07e-05	Down	Full=Pathogenesis-related protein PR-1; Flags: Precursor [Medicago truncatula]
2130	Bni07T011190	44	29	1	0	0	3.23	2.09	0.08	0	0	1.8	0.001	-10.8138	0.00109813	0.00476225	Down	Full=Pathogenesis-related protein R minor form; Short=PR-R; AltName: Full=PROB12; AltName: Full=Thaumatin-like protein E2; Flags: Precursor [Nicotiana tabacum]
336	Bni01T001778	559	650	551	840	3156	41.02	46.77	41.61	58.06	270.04	43.1333	164.05	1.9273	0.000426379	0.00209526	Up	Full=Pathogenesis-related thaumatin-like protein 3.5; AltName: Allergen=Cry j 3.5; Flags: Precursor [Cryptomeria japonica]
1906	Bni06T009950	12	11	14	47	28	0.88	0.79	1.06	3.25	2.4	0.91	2.825	1.6343	0.00613589	0.0206237	Up	Full=Pathogenesis-related thaumatin-like protein 3.5; AltName: Allergen=Cry j 3.5; Flags: Precursor [Cryptomeria japonica]
17	Bni01T000147	50	42	20	2	0	3.67	3.02	1.51	0.14	0	2.73333	0.07	-5.2872	4.73e-05	0.000307783	Down	Full=Pathogen-related protein [Hordeum vulgare]
2376	Bni08T012530	108	77	73	702	487	7.93	5.54	5.51	48.52	41.67	6.32667	45.095	2.8334	1.55e-24	1.6e-22	Up	Full=Pathogen-related protein [Hordeum vulgare]
258	Bni01T001425	22	9	9	1	0	1.61	0.65	0.68	0.07	0	0.98	0.035	-4.8074	0.00784151	0.0251899	Down	Full=Peamaclein; AltName: Allergen=Pru p 7 [Prunus persica]
1188	Bni04T006289	3168	2970	1068	982	544	232.49	213.72	80.66	67.88	46.55	175.623	57.215	-1.618	0.000422864	0.00208035	Down	Full=Pectate lyase; Flags: Precursor [Lilium longiflorum]
2535	Bni09T013532	3320	1894	1	3	3	243.65	136.29	0.08	0.21	0.26	126.673	0.235	-9.0742	0.000100411	0.000597592	Down	Full=Pectate lyase; Flags: Precursor [Lilium longiflorum]
1591	Bni06T008307	2323	1992	1391	774	695	170.48	143.34	105.05	53.5	59.47	139.623	56.485	-1.3056	9.32e-07	9.22e-06	Down	Full=Pectin acetylesterase 6; Flags: Precursor [Arabidopsis thaliana]
2091	Bni07T010997	1874	1856	1509	2807	5653	137.53	133.56	113.96	194.03	483.69	128.35	338.86	1.4006	0.000238271	0.00126948	Up	Full=Pectin acetylesterase 8; Flags: Precursor [Arabidopsis thaliana]
890	Bni03T004808	52	54	77	302	354	3.82	3.89	5.82	20.88	30.29	4.51	25.585	2.5041	1.03e-12	2.96e-11	Up	Full=Pectin acetylesterase 9; Flags: Precursor [Arabidopsis thaliana]
3031	Bni11T016206	1138	649	5	1	2	83.51	46.7	0.38	0.07	0.17	43.53	0.12	-8.5028	3.64e-05	0.000244016	Down	Full=Pectinesterase 2; Short=PE 2; AltName: Full=Pectin methylesterase 2; Short=AtPME2; Flags: Precursor [Arabidopsis thaliana]
105	Bni01T000751	820	582	175	0	0	60.18	41.88	13.22	0	0	38.4267	0.001	-15.2298	4.84e-13	1.46e-11	Down	Full=Pectinesterase 2; Short=PE 2; AltName: Full=Pectin methylesterase; Flags: Precursor [Citrus sinensis]
2191	Bni08T011571	174	152	98	42	27	12.77	10.94	7.4	2.9	2.31	10.37	2.605	-1.9931	2.68e-06	2.39e-05	Down	Full=Pectinesterase 2; Short=PE 2; AltName: Full=Pectin methylesterase; Flags: Precursor [Citrus sinensis]
920	Bni03T004978	93	141	68	3	11	6.83	10.15	5.14	0.21	0.94	7.37333	0.575	-3.6807	1.83e-07	2.13e-06	Down	Full=Pentatricopeptide repeat-containing protein At1g05600 [Arabidopsis thaliana]
403	Bni02T002248	350	369	384	169	115	25.69	26.55	29	11.68	9.84	27.08	10.76	-1.3315	5.45e-10	1.01e-08	Down	Full=Pentatricopeptide repeat-containing protein At1g12775, mitochondrial; Flags: Precursor [Arabidopsis thaliana]
314	Bni01T001690	523	542	562	926	1772	38.38	39	42.44	64.01	151.62	39.94	107.815	1.4327	0.000123489	0.000717464	Up	Full=Pentatricopeptide repeat-containing protein At1g19720; AltName: Full=Protein DYW7 [Arabidopsis thaliana]
2706	Bni10T014378	155	191	240	708	314	11.38	13.74	18.12	48.94	26.87	14.4133	37.905	1.395	9.53e-05	0.000570692	Up	Full=Pentatricopeptide repeat-containing protein At1g28690, mitochondrial; Flags: Precursor [Arabidopsis thaliana]
3345	Bni13T017922	81	102	86	22	17	5.94	7.34	6.49	1.52	1.45	6.59	1.485	-2.1498	2.21e-07	2.52e-06	Down	Full=Pentatricopeptide repeat-containing protein At1g31430 [Arabidopsis thaliana]
1417	Bni05T007384	1150	990	899	359	359	84.4	71.24	67.89	24.82	30.72	74.51	27.77	-1.4239	6.88e-11	1.49e-09	Down	Full=Pentatricopeptide repeat-containing protein At1g51965, mitochondrial; Flags: Precursor [Arabidopsis thaliana]
412	Bni02T002334	29	31	28	167	72	2.13	2.23	2.11	11.54	6.16	2.15667	8.85	2.0369	8.88e-06	7.01e-05	Up	Full=Pentatricopeptide repeat-containing protein At1g62680, mitochondrial; Flags: Precursor [Arabidopsis thaliana]
2762	Bni10T014637	242	235	234	82	107	17.76	16.91	17.67	5.67	9.16	17.4467	7.415	-1.2344	7.99e-05	0.000491236	Down	Full=Pentatricopeptide repeat-containing protein At1g66345, mitochondrial; Flags: Precursor [Arabidopsis thaliana]
370	Bni02T002057	235	285	264	141	109	17.25	20.51	19.94	9.75	9.33	19.2333	9.54	-1.0115	1.34e-05	0.000101528	Down	Full=Pentatricopeptide repeat-containing protein At1g71490 [Arabidopsis thaliana]
200	Bni01T001154	46	46	40	18	16	3.38	3.31	3.02	1.24	1.37	3.23667	1.305	-1.3105	0.00901299	0.0282874	Down	Full=Pentatricopeptide repeat-containing protein At1g77360, mitochondrial; Flags: Precursor [Arabidopsis thaliana]
2528	Bni09T013478	58	95	77	102	273	4.26	6.84	5.82	7.05	23.36	5.64	15.205	1.4308	0.0117878	0.0352147	Up	Full=Pentatricopeptide repeat-containing protein At2g02980, chloroplastic; AltName: Full=Protein ORGANELLE TRANSCRIPT PROCESSING 85; Flags: Precursor [Arabidopsis thaliana]
3617	BniUnT019372	23	14	28	1	0	1.69	1.01	2.11	0.07	0	1.60333	0.035	-5.5176	0.000941485	0.00417303	Down	Full=Pentatricopeptide repeat-containing protein At2g17140 [Arabidopsis thaliana]
2865	Bni11T015185	23	33	44	140	166	1.69	2.37	3.32	9.68	14.2	2.46	11.94	2.2791	3.45e-07	3.77e-06	Up	Full=Pentatricopeptide repeat-containing protein At2g17210 [Arabidopsis thaliana]
82	Bni01T000591	81	92	80	52	29	5.94	6.62	6.04	3.59	2.48	6.2	3.035	-1.0306	0.00788904	0.0253097	Down	Full=Pentatricopeptide repeat-containing protein At2g20540 [Arabidopsis thaliana]
1295	Bni05T006841	102	113	134	27	56	7.49	8.13	10.12	1.87	4.79	8.58	3.33	-1.3655	0.00728792	0.0236981	Down	Full=Pentatricopeptide repeat-containing protein At2g33760 [Arabidopsis thaliana]
1713	Bni06T008989	34	49	26	0	0	2.5	3.53	1.96	0	0	2.66333	0.001	-11.379	2.38e-06	2.15e-05	Down	Full=Pentatricopeptide repeat-containing protein At3g09040, mitochondrial; Flags: Precursor [Arabidopsis thaliana]
1128	Bni04T006006	213	220	272	129	81	15.63	15.83	20.54	8.92	6.93	17.3333	7.925	-1.1291	8.91e-05	0.000537605	Down	Full=Pentatricopeptide repeat-containing protein At3g12770 [Arabidopsis thaliana]
473	Bni02T002660	82	96	100	53	34	6.02	6.91	7.55	3.66	2.91	6.82667	3.285	-1.0553	0.00388198	0.0140103	Down	Full=Pentatricopeptide repeat-containing protein At3g56550 [Arabidopsis thaliana]
1091	Bni04T005878	638	618	661	1541	960	46.82	44.47	49.92	106.52	82.14	47.07	94.33	1.0029	6.09e-08	7.81e-07	Up	Full=Pentatricopeptide repeat-containing protein At3g59040 [Arabidopsis thaliana]
1103	Bni04T005918	52	91	21	0	0	3.82	6.55	1.59	0	0	3.98667	0.001	-11.961	1.13e-06	1.1e-05	Down	Full=Pentatricopeptide repeat-containing protein At4g02750 [Arabidopsis thaliana]
2882	Bni11T015336	16	18	17	64	63	1.17	1.3	1.28	4.42	5.39	1.25	4.905	1.9723	3.83e-05	0.000255527	Up	Full=Pentatricopeptide repeat-containing protein At4g14850; AltName: Full=Protein LOVASTATIN INSENSITIVE 1 [Arabidopsis thaliana]
51	Bni01T000402	434	452	440	789	1057	31.85	32.53	33.23	54.54	90.44	32.5367	72.49	1.1557	2.21e-05	0.000157619	Up	Full=Pentatricopeptide repeat-containing protein At4g16835, mitochondrial; AltName: Full=Protein DYW10; Flags: Precursor [Arabidopsis thaliana]
3302	Bni13T017706	112	148	143	246	325	8.22	10.65	10.8	17	27.81	9.89	22.405	1.1798	0.000393511	0.00195488	Up	Full=Pentatricopeptide repeat-containing protein At4g30825, chloroplastic; Flags: Precursor [Arabidopsis thaliana]
3450	Bni14T018401	330	331	280	154	135	24.22	23.82	21.15	10.65	11.55	23.0633	11.1	-1.055	2.65e-06	2.37e-05	Down	Full=Pentatricopeptide repeat-containing protein At4g39952, mitochondrial; Flags: Precursor [Arabidopsis thaliana]
2737	Bni10T014502	13	18	18	2	0	0.95	1.3	1.36	0.14	0	1.20333	0.07	-4.1035	0.00303638	0.0113221	Down	Full=Pentatricopeptide repeat-containing protein At5g06540 [Arabidopsis thaliana]
3067	Bni12T016414	347	348	369	146	95	25.47	25.04	27.87	10.09	8.13	26.1267	9.11	-1.52	1.83e-11	4.31e-10	Down	Full=Pentatricopeptide repeat-containing protein At5g09450, mitochondrial; Flags: Precursor [Arabidopsis thaliana]
3195	Bni12T017120	63	68	94	2	0	4.62	4.89	7.1	0.14	0	5.53667	0.07	-6.3055	5.22e-08	6.79e-07	Down	Full=Pentatricopeptide repeat-containing protein At5g12100, mitochondrial; Flags: Precursor [Arabidopsis thaliana]
411	Bni02T002315	162	131	119	74	53	11.89	9.43	8.99	5.12	4.53	10.1033	4.825	-1.0662	0.00123453	0.00524965	Down	Full=Pentatricopeptide repeat-containing protein At5g16640, mitochondrial; Flags: Precursor [Arabidopsis thaliana]
2991	Bni11T015944	86	103	95	33	38	6.31	7.41	7.17	2.28	3.25	6.96333	2.765	-1.3325	0.000501865	0.00241267	Down	Full=Pentatricopeptide repeat-containing protein At5g19020, mitochondrial; Flags: Precursor [Arabidopsis thaliana]
1177	Bni04T006228	67	68	85	41	28	4.92	4.89	6.42	2.83	2.4	5.41	2.615	-1.0488	0.0103078	0.0315237	Down	Full=Pentatricopeptide repeat-containing protein At5g39680; AltName: Full=Protein EMBRYO DEFECTIVE 2744 [Arabidopsis thaliana]
2264	Bni08T011918	7	9	11	0	0	0.51	0.65	0.83	0	0	0.663333	0.001	-9.3736	0.00361288	0.0131601	Down	Full=Pentatricopeptide repeat-containing protein At5g48910 [Arabidopsis thaliana]
2881	Bni11T015334	481	497	546	215	260	35.3	35.76	41.23	14.86	22.25	37.43	18.555	-1.0124	0.000123988	0.000719155	Down	Full=Pentatricopeptide repeat-containing protein At5g56310 [Arabidopsis thaliana]
64	Bni01T000496	157	187	211	103	67	11.52	13.46	15.93	7.12	5.73	13.6367	6.425	-1.0857	0.000347464	0.00175541	Down	Full=Pentatricopeptide repeat-containing protein At5g59600 [Arabidopsis thaliana]
2994	Bni11T015964	23	36	28	6	4	1.69	2.59	2.11	0.41	0.34	2.13	0.375	-2.5059	0.000981127	0.00432101	Down	Full=Peptide methionine sulfoxide reductase B5; Short=AtMSRB5; AltName: Full=Peptide-methionine (R)-S-oxide reductase [Arabidopsis thaliana]
2698	Bni10T014355	11610	7919	3212	1390	586	852.03	569.85	242.57	96.08	50.14	554.817	73.11	-2.9239	1.16e-08	1.7e-07	Down	Full=Peptide methionine sulfoxide reductase; AltName: Full=Fruit-ripening protein E4; AltName: Full=Peptide-methionine (S)-S-oxide reductase; Short=Peptide Met(O) reductase; AltName: Full=Protein-methionine-S-oxide reductase [Fragaria x ananassa]
3359	Bni13T017972	1416	1344	1274	1983	3943	103.92	96.71	96.21	137.07	337.37	98.9467	237.22	1.2615	0.000731059	0.00334505	Up	Full=Peptidyl-prolyl cis-trans isomerase CYP37, chloroplastic; Short=PPIase CYP37; AltName: Full=Rotamase CYP37; AltName: Full=Thylakoid lumen PPIase of 38 kDa; Short=TLP38; Short=p38; Flags: Precursor [Arabidopsis thaliana]
1825	Bni06T009556	1197	1324	1245	465	341	87.84	95.28	94.02	32.14	29.18	92.38	30.66	-1.5912	2.7e-27	3.4e-25	Down	Full=Peptidyl-prolyl cis-trans isomerase CYP40; Short=PPIase CYP40; AltName: Full=Cyclophilin of 40 kDa; Short=Cyclophilin-40; AltName: Full=Protein SQUINT; AltName: Full=Rotamase CYP40 [Arabidopsis thaliana]
1385	Bni05T007236	264	318	291	159	113	19.37	22.88	21.98	10.99	9.67	21.41	10.33	-1.0514	4.17e-06	3.56e-05	Down	Full=Peptidyl-prolyl cis-trans isomerase FKBP13, chloroplastic; Short=PPIase FKBP13; AltName: Full=FK506-binding protein 1; AltName: Full=FK506-binding protein 13; Short=AtFKBP13; AltName: Full=Immunophilin FKBP13; AltName: Full=Rotamase; Flags: Precursor [Arabidopsis thaliana]
3240	Bni13T017360	35	24	40	192	185	2.57	1.73	3.02	13.27	15.83	2.44	14.55	2.5761	1.6e-11	3.84e-10	Up	Full=Peptidyl-prolyl cis-trans isomerase FKBP17-1, chloroplastic; Short=PPIase FKBP17-1; AltName: Full=FK506-binding protein 17-1; Short=AtFKBP17-1; AltName: Full=Immunophilin FKBP17-1; AltName: Full=Rotamase; Flags: Precursor [Arabidopsis thaliana]
3573	Bni14T019064	2175	2319	2278	1352	707	159.62	166.88	172.04	93.46	60.49	166.18	76.975	-1.1103	1.04e-06	1.02e-05	Down	Full=Peptidyl-prolyl cis-trans isomerase Pin1; Short=PPIase Pin1; AltName: Full=DlPar13; AltName: Full=Rotamase Pin1 [Digitalis lanata]
1376	Bni05T007194	257	259	246	54	23	18.86	18.64	18.58	3.73	1.97	18.6933	2.85	-2.7135	4.68e-15	1.88e-13	Down	Full=Peroxidase 15; Short=Prx15; AltName: Full=Anionic peroxidase; Flags: Precursor [Ipomoea batatas]
3264	Bni13T017538	11	5	8	0	0	0.81	0.36	0.6	0	0	0.59	0.001	-9.2046	0.0068387	0.0224871	Down	Full=Peroxidase 15; Short=Prx15; AltName: Full=Anionic peroxidase; Flags: Precursor [Ipomoea batatas]
1275	Bni05T006746	92	116	142	343	135	6.75	8.35	10.72	23.71	11.55	8.60667	17.63	1.0345	0.012904	0.0378936	Up	Full=Peroxidase 19; Short=Atperox P19; AltName: Full=ATP51; Flags: Precursor [Arabidopsis thaliana]
3019	Bni11T016150	6	6	4	42	13	0.44	0.43	0.3	2.9	1.11	0.39	2.005	2.3621	0.00751927	0.0243131	Up	Full=Peroxidase 29; Short=Atperox P29; AltName: Full=ATP40; Flags: Precursor [Arabidopsis thaliana]
1898	Bni06T009921	173	141	106	8	3	12.7	10.15	8.01	0.55	0.26	10.2867	0.405	-4.6667	8.73e-15	3.34e-13	Down	Full=Peroxidase 43; Short=Atperox P43; Flags: Precursor [Arabidopsis thaliana]
798	Bni03T004427	59	79	47	259	105	4.33	5.68	3.55	17.9	8.98	4.52	13.44	1.5721	0.000481232	0.00232752	Up	Full=Peroxidase 47; Short=Atperox P47; AltName: Full=ATP32; Flags: Precursor [Arabidopsis thaliana]
930	Bni03T005036	184	189	187	0	0	13.5	13.6	14.12	0	0	13.74	0.001	-13.7461	1.57e-11	3.78e-10	Down	Full=Peroxidase 5; Flags: Precursor [Vitis vinifera]
2573	Bni09T013692	1393	1317	1019	22	7	102.23	94.77	76.96	1.52	0.6	91.32	1.06	-6.4288	1.35e-64	1.11e-61	Down	Full=Peroxidase 5; Flags: Precursor [Vitis vinifera]
489	Bni02T002727	150	124	57	464	1889	11.01	8.92	4.3	32.07	161.63	8.07667	96.85	3.5839	5.7e-08	7.35e-07	Up	Full=Peroxidase 52; Short=Atperox P52; AltName: Full=ATP49; Flags: Precursor [Arabidopsis thaliana]
1199	Bni04T006343	564	705	695	1765	1056	41.39	50.73	52.49	122	90.35	48.2033	106.175	1.1392	1.07e-07	1.3e-06	Up	Full=Peroxidase 63; Short=Atperox P63; AltName: Full=ATP26a; Flags: Precursor [Arabidopsis thaliana]
349	Bni01T001810	14	3	11	32	430	1.03	0.22	0.83	2.21	36.79	0.693333	19.5	4.8138	5.79e-06	4.76e-05	Up	Full=Peroxidase 64; Short=Atperox P64; AltName: Full=ATP17a; AltName: Full=PRXR4; Flags: Precursor [Arabidopsis thaliana]
3583	Bni14T019119	66	106	96	535	461	4.84	7.63	7.25	36.98	39.44	6.57333	38.21	2.5393	8.64e-20	6.02e-18	Up	Full=Peroxidase 64; Short=Atperox P64; AltName: Full=ATP17a; AltName: Full=PRXR4; Flags: Precursor [Arabidopsis thaliana]
2740	Bni10T014518	235	139	2	0	1	17.25	10	0.15	0	0.09	9.13333	0.045	-7.6651	0.00135251	0.00566897	Down	Full=Peroxidase 65; Short=Atperox P65; AltName: Full=ATP43; Flags: Precursor [Arabidopsis thaliana]
3560	Bni14T019020	73	54	102	724	315	5.36	3.89	7.7	50.05	26.95	5.65	38.5	2.7685	3.85e-11	8.66e-10	Up	Full=Peroxidase 72; Short=Atperox P72; AltName: Full=ATP6a; AltName: Full=PRXR8; Flags: Precursor [Arabidopsis thaliana]
313	Bni01T001684	11693	12248	11452	10	2	858.12	881.37	864.86	0.69	0.17	868.117	0.43	-10.9793	1.94e-136	1.12e-132	Down	Full=Peroxidase 9; Short=Atperox P9; AltName: Full=ATP18a; Flags: Precursor [Arabidopsis thaliana]
302	Bni01T001643	76	57	81	35	16	5.58	4.1	6.12	2.42	1.37	5.26667	1.895	-1.4747	0.00302525	0.0112935	Down	Full=Peroxiredoxin-2E-1, chloroplastic; AltName: Full=Glutaredoxin-dependent peroxiredoxin; AltName: Full=Peroxiredoxin IIE-1; AltName: Full=Thioredoxin peroxidase 2E-1; Flags: Precursor [Oryza sativa Japonica Group]
1405	Bni05T007341	1509	1629	1533	3307	5306	110.74	117.22	115.77	228.59	454	114.577	341.295	1.5747	3.47e-07	3.79e-06	Up	Full=Peroxisome biogenesis protein 2; AltName: Full=E3 ubiquitin-protein ligase PEX2; AltName: Full=Peroxin-2; Short=AtPEX2; Short=AthPEX2; AltName: Full=Pex2p [Arabidopsis thaliana]
2273	Bni08T011950	1663	1184	511	1	0	122.04	85.2	38.59	0.07	0	81.9433	0.035	-11.1931	1.11e-13	3.67e-12	Down	Full=PHD finger protein ALFIN-LIKE 8 [Oryza sativa Indica Group] >Q2R837.1 RecName: Full=PHD finger protein ALFIN-LIKE 8 [Oryza sativa Japonica Group]
1046	Bni04T005656	2560	1849	907	1	4	187.87	133.05	68.5	0.07	0.34	129.807	0.205	-9.3065	1.13e-32	2.15e-30	Down	Full=PHD finger protein MALE MEIOCYTE DEATH 1 [Arabidopsis thaliana]
2274	Bni08T011951	31	26	29	5	4	2.28	1.87	2.19	0.35	0.34	2.11333	0.345	-2.6149	0.000499214	0.00240394	Down	Full=Phenylalanine ammonia-lyase 1 [Prunus avium]
305	Bni01T001651	75	60	29	292	1121	5.5	4.32	2.19	20.18	95.92	4.00333	58.05	3.858	7.04e-09	1.09e-07	Up	Full=Phenylcoumaran benzylic ether reductase Betv6; AltName: Full=Minor pollen allergen Bet v 6; AltName: Allergen=Bet v 6 [Betula pendula]
3553	Bni14T018991	255	194	216	1317	1068	18.71	13.96	16.31	91.04	91.38	16.3267	91.21	2.482	6.74e-34	1.31e-31	Up	Full=Phenylcoumaran benzylic ether reductase Pyrc5; AltName: Full=Minor fruit allergen Pyr c 5; AltName: Allergen=Pyr c 5 [Pyrus communis]
366	Bni02T001993	273	322	287	719	783	20.03	23.17	21.67	49.7	67	21.6233	58.35	1.4321	2.42e-10	4.71e-09	Up	Full=Pheophorbide a oxygenase, chloroplastic; Short=AtPaO; Short=Pheide a oxygenase; AltName: Full=Accelerated cell death 1; AltName: Full=Lethal leaf-spot 1 homolog; Short=Lls1; Flags: Precursor [Arabidopsis thaliana]
2491	Bni09T013294	30	30	52	272	209	2.2	2.16	3.93	18.8	17.88	2.76333	18.34	2.7305	8.65e-13	2.53e-11	Up	Full=Phosphate transporter PHO1 homolog 1; AltName: Full=Protein PHO1 homolog 1; Short=AtPHO1;H1 [Arabidopsis thaliana]
3238	Bni12T017328	2841	2139	1278	947	690	208.49	153.92	96.51	65.46	59.04	152.973	62.25	-1.2971	0.000189833	0.00104493	Down	Full=Phosphatidate phosphatase PAH1; AltName: Full=Phosphatidic acid phosphohydrolase 1; Short=AtPAH1 [Arabidopsis thaliana]
2034	Bni07T010652	815	781	722	241	272	59.81	56.2	54.53	16.66	23.27	56.8467	19.965	-1.5096	4.62e-11	1.02e-09	Down	Full=Phosphatidylglycerophosphate phosphatase PTPMT1; AltName: Full=Protein TYROSINE PHOSPHATASE LOCALIZED TO THE MITOCHONDRION 1; AltName: Full=Putative dual specificity protein phosphatase DSP8 [Arabidopsis thaliana]
1175	Bni04T006212	100	55	1	0	1	7.34	3.96	0.08	0	0.09	3.79333	0.045	-6.3974	0.00105532	0.00459968	Down	Full=Phosphatidylinositol 3,4,5-trisphosphate 3-phosphatase and protein-tyrosine-phosphatase PTEN1; AltName: Full=Protein PHOSPHATASE AND TENSIN HOMOLOG 1; Short=AtPTEN1 [Arabidopsis thaliana]
913	Bni03T004940	579	634	733	309	139	42.49	45.62	55.36	21.36	11.89	47.8233	16.625	-1.5244	9.61e-07	9.5e-06	Down	Full=Phosphatidylinositol 4-kinase gamma 4; Short=AtPI4Kgamma4; Short=PI-4Kgamma4; Short=PI4K gamma 4; AltName: Full=Ubiquitin-like domain kinase gamma 4; Short=UbDK gamma 4 [Arabidopsis thaliana]
3078	Bni12T016524	374	253	85	15	20	27.45	18.21	6.42	1.04	1.71	17.36	1.375	-3.6583	5.36e-08	6.96e-07	Down	Full=Phosphatidylinositol 4-kinase gamma 8; Short=AtPI4Kgamma8; Short=PI-4Kgamma8; Short=PI4K gamma 8 [Arabidopsis thaliana]
3099	Bni12T016618	96	50	4	1	0	7.05	3.6	0.3	0.07	0	3.65	0.035	-6.7044	0.000405357	0.00200623	Down	Full=Phosphatidylinositol 4-phosphate 5-kinase 4; Short=AtPIP5K4; AltName: Full=1-phosphatidylinositol 4-phosphate kinase 4; AltName: Full=Diphosphoinositide kinase 4; AltName: Full=PtdIns(4)P-5-kinase 4 [Arabidopsis thaliana]
3550	Bni14T018967	177	167	157	470	255	12.99	12.02	11.86	32.49	21.82	12.29	27.155	1.1437	2.45e-05	0.000171977	Up	Full=Phosphatidylinositol/phosphatidylcholine transfer protein SFH11; AltName: Full=Protein SEC FOURTEEN HOMOLOGS 11; Short=AtSFH11 [Arabidopsis thaliana]
1857	Bni06T009684	547	349	62	55	29	40.14	25.11	4.68	3.8	2.48	23.31	3.14	-2.8921	0.00020743	0.00112691	Down	Full=Phosphatidylinositol/phosphatidylcholine transfer protein SFH3; AltName: Full=Protein SEC FOURTEEN HOMOLOGS 3; Short=AtSFH3 [Arabidopsis thaliana]
735	Bni03T004128	2811	2403	1734	1047	965	206.29	172.92	130.95	72.37	82.57	170.053	77.47	-1.1343	9.78e-06	7.64e-05	Down	Full=Phosphatidylinositol-3-phosphatase myotubularin-1; Short=AtMTM1; AltName: Full=Phosphatidylinositol-3,5-bisphosphate 3-phosphatase; AltName: Full=Phosphatidylinositol-3-phosphate phosphatase [Arabidopsis thaliana]
1891	Bni06T009876	987	1014	870	1126	2387	72.43	72.97	65.7	77.83	204.24	70.3667	141.035	1.0031	0.0112129	0.033807	Up	Full=Phospho-2-dehydro-3-deoxyheptonate aldolase 2, chloroplastic; AltName: Full=3-deoxy-D-arabino-heptulosonate 7-phosphate synthase 2; AltName: Full=DAHP synthase 2; AltName: Full=Phospho-2-keto-3-deoxyheptonate aldolase 2; Flags: Precursor [Arabidopsis thaliana]
599	Bni02T003304	655	717	599	769	2215	48.07	51.6	45.24	53.16	189.52	48.3033	121.34	1.3289	0.00579524	0.0196816	Up	Full=Phosphoenolpyruvate carboxylase kinase 2; Short=AtPPCK2 [Arabidopsis thaliana]
2942	Bni11T015709	102	102	69	159	295	7.49	7.34	5.21	10.99	25.24	6.68	18.115	1.4393	0.00176673	0.00711845	Up	Full=Phosphoenolpyruvate carboxylase kinase 2; Short=AtPPCK2 [Arabidopsis thaliana]
2722	Bni10T014449	2243	2236	2329	1290	781	164.61	160.9	175.89	89.17	66.82	167.133	77.995	-1.0995	1.8e-09	3.08e-08	Down	Full=Phosphoenolpyruvate/phosphate translocator 1, chloroplastic; Short=OsPPT1; Flags: Precursor [Oryza sativa Japonica Group]
116	Bni01T000809	1561	1177	1007	675	449	114.56	84.7	76.05	46.66	38.42	91.77	42.54	-1.1092	2.06e-05	0.000148025	Down	Full=Phosphoglycerate mutase-like protein 1 [Arabidopsis thaliana]
3531	Bni14T018863	1813	1659	1339	412	318	133.05	119.38	101.12	28.48	27.21	117.85	27.845	-2.0815	8.05e-25	8.48e-23	Down	Full=Phosphoglycerate mutase-like protein 4 [Arabidopsis thaliana]
509	Bni02T002808	1663	1713	1596	5043	4788	122.04	123.27	120.53	348.59	409.67	121.947	379.13	1.6364	4.2e-29	6.05e-27	Up	Full=Phosphoinositide phospholipase C 4; AltName: Full=Phosphoinositide phospholipase PLC4; Short=AtPLC4; Short=PI-PLC4 [Arabidopsis thaliana]
2212	Bni08T011699	53	60	73	225	128	3.89	4.32	5.51	15.55	10.95	4.57333	13.25	1.5347	9.88e-06	7.7e-05	Up	Full=Phospholipase A1 PLIP1, chloroplastic; AltName: Full=Galactolipase PLIP1; AltName: Full=Protein PLASTID LIPASE 1; Flags: Precursor [Arabidopsis thaliana]
1622	Bni06T008489	1172	1071	741	505	339	86.01	77.07	55.96	34.91	29.01	73.0133	31.96	-1.1919	7.56e-06	6.07e-05	Down	Full=Phospholipase A1 PLIP2, chloroplastic; AltName: Full=Galactolipase PLIP2; AltName: Full=Protein PLASTID LIPASE 2; Flags: Precursor [Arabidopsis thaliana]
2038	Bni07T010671	52	51	72	208	93	3.82	3.67	5.44	14.38	7.96	4.31	11.17	1.3739	0.00123235	0.00524382	Up	Full=Phospholipase A1-Ibeta2, chloroplastic; Flags: Precursor [Arabidopsis thaliana]
619	Bni02T003449	62	46	54	143	85	4.55	3.31	4.08	9.88	7.27	3.98	8.575	1.1074	0.0026652	0.0101312	Up	Full=Phospholipase A1-Igamma3, chloroplastic; Flags: Precursor [Arabidopsis thaliana]
1265	Bni05T006703	850	569	203	175	75	62.38	40.95	15.33	12.1	6.42	39.5533	9.26	-2.0947	0.000386013	0.00192427	Down	Full=Phospholipase A1-IIgamma; AltName: Full=DAD1-like seedling establishment-related lipase; Short=AtDSEL; Short=Phospholipase DSEL [Arabidopsis thaliana]
3338	Bni13T017905	85	52	19	13	2	6.24	3.74	1.43	0.9	0.17	3.80333	0.535	-2.8297	0.00350612	0.0128253	Down	Full=Phospholipase D alpha 1; Short=PLD 1; AltName: Full=Choline phosphatase 1; AltName: Full=Phosphatidylcholine-hydrolyzing phospholipase D 1; Flags: Precursor [Ricinus communis]
1363	Bni05T007129	25	19	13	0	0	1.83	1.37	0.98	0	0	1.39333	0.001	-10.4443	0.000105225	0.000622665	Down	Full=Phospholipid-transporting ATPase 6; Short=AtALA6; AltName: Full=Aminophospholipid flippase 6 [Arabidopsis thaliana]
3551	Bni14T018988	1092	1045	712	522	373	80.14	75.2	53.77	36.08	31.91	69.7033	33.995	-1.0359	4.87e-05	0.000315628	Down	Full=Phosphopantetheine adenylyltransferase; AltName: Full=AtCoaD; AltName: Full=Dephospho-CoA pyrophosphorylase; AltName: Full=Pantetheine-phosphate adenylyltransferase [Arabidopsis thaliana]
3457	Bni14T018465	113	114	130	203	280	8.29	8.2	9.82	14.03	23.96	8.77	18.995	1.115	0.00114055	0.00491288	Up	Full=Photosynthetic NDH subunit of lumenal location 4, chloroplastic; AltName: Full=FK506-binding protein 16-2; Short=AtFKBP16-2; AltName: Full=Immunophilin FKBP16-2; AltName: Full=Peptidyl-prolyl cis-trans isomerase FKBP16-2; Short=PPIase FKBP16-2; AltName: Full=Rotamase; Flags: Precursor [Arabidopsis thaliana]
3045	Bni12T016298	113	153	109	260	390	8.29	11.01	8.23	17.97	33.37	9.17667	25.67	1.484	7.18e-05	0.000447036	Up	Full=Photosynthetic NDH subunit of subcomplex B 2, chloroplastic; Short=Protein PnsB2; AltName: Full=NAD(P)H DEHYDROGENASE SUBUNIT 45; AltName: Full=NDH-DEPENDENT CYCLIC ELECTRON FLOW 2; Flags: Precursor [Arabidopsis thaliana]
157	Bni01T000957	60	66	74	197	135	4.4	4.75	5.59	13.62	11.55	4.91333	12.585	1.3569	5.45e-06	4.51e-05	Up	Full=Photosynthetic NDH subunit of subcomplex B 3, chloroplastic; Short=Protein PnsB3; AltName: Full=NDH-DEPENDENT CYCLIC ELECTRON FLOW 4; Flags: Precursor [Arabidopsis thaliana]
1408	Bni05T007349	130	141	165	74	62	9.54	10.15	12.46	5.12	5.3	10.7167	5.21	-1.0405	0.000663338	0.00307768	Down	Full=Photosynthetic NDH subunit of subcomplex B 3, chloroplastic; Short=Protein PnsB3; AltName: Full=NDH-DEPENDENT CYCLIC ELECTRON FLOW 4; Flags: Precursor [Arabidopsis thaliana]
1206	Bni04T006373	239	273	253	521	484	17.54	19.65	19.11	36.01	41.41	18.7667	38.71	1.0445	5.92e-08	7.62e-07	Up	Full=Photosystem I assembly factor PSA3, chloroplastic; AltName: Full=Protein PHOTOSYSTEM I ASSEMBLY 3; AltName: Full=Protein PIGMENT DEFECTIVE 329; Flags: Precursor [Arabidopsis thaliana]
3593	BniUnT019227	14	36	143	390	157	1.03	2.59	10.8	26.96	13.43	4.80667	20.195	2.0709	0.0163349	0.045998	Up	Full=Photosystem I P700 chlorophyll a apoprotein A1; AltName: Full=PSI-A; AltName: Full=PsaA [Morus indica]
3597	BniUnT019235	14	71	154	699	252	1.03	5.11	11.63	48.32	21.56	5.92333	34.94	2.5604	0.00161669	0.00660322	Up	Full=Photosystem I P700 chlorophyll a apoprotein A2; AltName: Full=PSI-B; AltName: Full=PsaB [Morus indica]
1365	Bni05T007133	509	553	587	1987	1271	37.35	39.79	44.33	137.35	108.75	40.49	123.05	1.6036	2.4e-18	1.43e-16	Up	Full=Photosystem I reaction center subunit III; AltName: Full=Light-harvesting complex I 17 kDa protein; AltName: Full=PSI-F [Pisum sativum]
1716	Bni06T008997	148	184	205	624	514	10.86	13.24	15.48	43.13	43.98	13.1933	43.555	1.723	4.46e-14	1.56e-12	Up	Full=Photosystem I reaction center subunit IV, chloroplastic; Short=PSI-E; Flags: Precursor [Spinacia oleracea]
3466	Bni14T018524	361	411	457	749	839	26.49	29.58	34.51	51.77	71.79	30.1933	61.78	1.0329	1.91e-05	0.000138549	Up	Full=Photosystem I reaction center subunit N, chloroplastic; Short=PSI-N; Flags: Precursor [Zea mays]
612	Bni02T003397	432	577	592	931	1154	31.7	41.52	44.71	64.35	98.74	39.31	81.545	1.0527	0.000146187	0.000828767	Up	Full=Photosystem I reaction center subunit XI, chloroplastic; Short=PSI-L; AltName: Full=PSI subunit V; Flags: Precursor [Cucumis sativus]
1681	Bni06T008826	699	772	780	2329	2060	51.3	55.55	58.91	160.99	176.26	55.2533	168.625	1.6097	2.87e-28	3.87e-26	Up	Full=Photosystem I reaction center subunit XI, chloroplastic; Short=PSI-L; AltName: Full=PSI subunit V; Flags: Precursor [Cucumis sativus]
2979	Bni11T015872	35	46	46	196	81	2.57	3.31	3.47	13.55	6.93	3.11667	10.24	1.7161	0.000138988	0.000794949	Up	Full=Photosystem II D1 precursor processing protein PSB27-H2, chloroplastic; Short=Psb27-H2; AltName: Full=LOW PSII accumulation 19 protein; Short=LPA19; AltName: Full=Thylakoid lumenal protein PSB27-H2; Flags: Precursor [Arabidopsis thaliana]
1719	Bni06T009023	72	70	81	191	102	5.28	5.04	6.12	13.2	8.73	5.48	10.965	1.0007	0.00334289	0.0123012	Up	Full=Photosystem II reaction center PSB28 protein, chloroplastic; AltName: Full=Photosystem II protein W-like; Flags: Precursor [Oryza sativa Japonica Group]
1675	Bni06T008799	292	266	246	530	1412	21.43	19.14	18.58	36.64	120.81	19.7167	78.725	1.9974	3.04e-05	0.000207932	Up	Full=Phototropin-2; AltName: Full=Defective in chloroplast avoidance protein 1; AltName: Full=Non-phototropic hypocotyl 1-like protein 1; Short=AtKin7; Short=NPH1-like protein 1 [Arabidopsis thaliana]
476	Bni02T002664	1363	1328	1171	4692	1896	100.03	95.56	88.43	324.33	162.23	94.6733	243.28	1.3616	1.04e-05	8.1e-05	Up	Full=Phytochrome A [Pisum sativum]
475	Bni02T002663	1722	1905	1693	3571	3429	126.37	137.08	127.86	246.84	293.4	130.437	270.12	1.0503	9.62e-12	2.4e-10	Up	Full=Phytochrome A [Populus tremuloides]
1787	Bni06T009366	279	337	331	154	122	20.48	24.25	25	10.65	10.44	23.2433	10.545	-1.1403	4.22e-07	4.54e-06	Down	Full=Phytochrome A-associated F-box protein; AltName: Full=Empfindlicher im dunkelroten Licht protein 1 [Arabidopsis thaliana]
3361	Bni13T017980	129	94	122	51	36	9.47	6.76	9.21	3.53	3.08	8.48	3.305	-1.3594	0.000236481	0.00126228	Down	Full=Phytohormone-binding protein CSBP; AltName: Full=Cytokinin-specific binding protein; Short=VrCSBP; AltName: Full=Major pollen allergen Bet v 1-like protein; AltName: Full=Pathogenesis-related PR10-like protein; AltName: Allergen=Vig r 6 [Vigna radiata var. radiata]
1887	Bni06T009867	6	2	2	18	28	0.44	0.14	0.15	1.24	2.4	0.243333	1.82	2.9029	0.00451793	0.0159555	Up	Full=Phytosulfokine receptor 1; Short=DcPSKR1; AltName: Full=Phytosulfokine LRR receptor kinase 1; Flags: Precursor [Daucus carota]
1162	Bni04T006159	346	402	517	96	52	25.39	28.93	39.04	6.64	4.45	31.12	5.545	-2.4886	2.21e-14	8.01e-13	Down	Full=PI-PLC X domain-containing protein At5g67130; Flags: Precursor [Arabidopsis thaliana]
3523	Bni14T018832	10	8	7	66	238	0.73	0.58	0.53	4.56	20.36	0.613333	12.46	4.3445	9.94e-09	1.48e-07	Up	Full=PI-PLC X domain-containing protein At5g67130; Flags: Precursor [Arabidopsis thaliana]
2489	Bni09T013286	118	139	180	614	255	8.66	10	13.59	42.44	21.82	10.75	32.13	1.5796	3.64e-05	0.000244016	Up	Full=Piriformospora indica-insensitive protein 2; Flags: Precursor [Arabidopsis thaliana]
2622	Bni10T013957	5	6	10	214	69	0.37	0.43	0.76	14.79	5.9	0.52	10.345	4.3143	1.01e-10	2.09e-09	Up	Full=Piriformospora indica-insensitive protein 2; Flags: Precursor [Arabidopsis thaliana]
2892	Bni11T015414	138	128	99	254	582	10.13	9.21	7.48	17.56	49.8	8.94	33.68	1.9135	6.82e-05	0.000427029	Up	Full=Pirin-like protein [Solanum lycopersicum]
3423	Bni13T018238	87	77	71	183	218	6.38	5.54	5.36	12.65	18.65	5.76	15.65	1.442	1.33e-05	0.000100353	Up	Full=Pirin-like protein [Solanum lycopersicum]
2716	Bni10T014427	33	30	46	243	205	2.42	2.16	3.47	16.8	17.54	2.68333	17.17	2.6778	7.02e-15	2.74e-13	Up	Full=Plant UBX domain-containing protein 10; Short=PUX10 [Arabidopsis thaliana]
2347	Bni08T012409	1762	1327	861	522	345	129.31	95.49	65.02	36.08	29.52	96.6067	32.8	-1.5584	3.63e-06	3.15e-05	Down	Full=Plant UBX domain-containing protein 9; Short=PUX9 [Arabidopsis thaliana]
2172	Bni08T011459	172	112	92	2	0	12.62	8.06	6.95	0.14	0	9.21	0.07	-7.0397	9.65e-10	1.72e-08	Down	Full=Plasma membrane ATPase 1; AltName: Full=Proton pump 1 [Solanum lycopersicum]
1392	Bni05T007257	273	247	166	281	793	20.03	17.77	12.54	19.42	67.85	16.78	43.635	1.3787	0.00932128	0.0290468	Up	Full=Plasma membrane-associated cation-binding protein 1; Short=AtPCAP1; AltName: Full=Microtubule-destabilizing protein 25 [Arabidopsis thaliana]
1061	Bni04T005738	84	113	125	367	142	6.16	8.13	9.44	25.37	12.15	7.91	18.76	1.2459	0.00279781	0.0105539	Up	Full=PLASMODESMATA CALLOSE-BINDING PROTEIN 5; Short=AtPDCB5; AltName: Full=Glucan endo-1,3-beta-glucosidase-like protein 1; Flags: Precursor [Arabidopsis thaliana]
2421	Bni09T012927	251	207	231	399	554	18.42	14.9	17.45	27.58	47.4	16.9233	37.49	1.1475	0.000288989	0.00149991	Up	Full=Plasmodesmata-located protein 6; Short=PD-located protein 6; AltName: Full=Cysteine-rich repeat secretory protein 12; Flags: Precursor [Arabidopsis thaliana]
2190	Bni08T011570	25	19	29	58	69	1.83	1.37	2.19	4.01	5.9	1.79667	4.955	1.4636	0.00349746	0.0127963	Up	Full=Plasmodesmata-located protein 8; Short=PD-located protein 8; AltName: Full=Cysteine-rich repeat secretory protein 15; Flags: Precursor [Arabidopsis thaliana]
2077	Bni07T010888	963	818	503	279	388	70.67	58.86	37.99	19.29	33.2	55.84	26.245	-1.0893	0.0044787	0.0158364	Down	Full=Plastidal glycolate/glycerate translocator 1, chloroplastic; AltName: Full=Bacterial membrane protein LrgB-like protein; Short=AtLrgB; Flags: Precursor [Arabidopsis thaliana]
155	Bni01T000947	375	410	420	721	1666	27.52	29.5	31.72	49.84	142.55	29.58	96.195	1.7013	7.8e-05	0.000480847	Up	Full=Pleiotropic drug resistance protein 1; Short=PaPDR1; AltName: Full=ABC transporter G family PDR1; AltName: Full=Strigolactone transporter [Petunia axillaris]
380	Bni02T002101	222	208	144	311	860	16.29	14.97	10.87	21.5	73.58	14.0433	47.54	1.7593	0.000737796	0.00337231	Up	Full=Pleiotropic drug resistance protein 2; AltName: Full=NpPDR2 [Nicotiana plumbaginifolia]
2779	Bni10T014693	7	7	0	32	570	0.51	0.5	0	2.21	48.77	0.336667	25.49	6.2425	0.00181395	0.00727139	Up	Full=Pleiotropic drug resistance protein 3; AltName: Full=NtPDR3 [Nicotiana tabacum]
570	Bni02T003126	1282	1166	914	539	350	94.08	83.91	69.03	37.26	29.95	82.34	33.605	-1.2929	2.38e-08	3.32e-07	Down	Full=P-loop NTPase domain-containing protein LPA1 homolog 1; AltName: Full=Protein LOW PHYTIC ACID 1 homolog 1 [Arabidopsis thaliana]
275	Bni01T001491	2	0	0	5	161	0.15	0	0	0.35	13.78	0.05	7.065	7.1426	5.92e-05	0.000375817	Up	Full=Polcalcin Bet v 4; AltName: Full=Calcium-binding pollen allergen Bet v 4; AltName: Allergen=Bet v 4 [Betula pendula]
2856	Bni10T015091	160	115	41	16	12	11.74	8.28	3.1	1.11	1.03	7.70667	1.07	-2.8485	3.93e-05	0.000260973	Down	Full=Pollen receptor-like kinase 1; Short=AtPRK1; AltName: Full=LRR receptor-like serine/threonine-protein kinase RLK; Flags: Precursor [Arabidopsis thaliana]
1449	Bni05T007542	94	58	3	0	1	6.9	4.17	0.23	0	0.09	3.76667	0.045	-6.3872	0.000489164	0.00236081	Down	Full=Pollen receptor-like kinase 3; Short=AtPRK3; Flags: Precursor [Arabidopsis thaliana]
2250	Bni08T011858	118	93	17	10	12	8.66	6.69	1.28	0.69	1.03	5.54333	0.86	-2.6883	0.00228061	0.00885834	Down	Full=Pollen receptor-like kinase 3; Short=AtPRK3; Flags: Precursor [Arabidopsis thaliana]
2261	Bni08T011908	140	89	10	13	3	10.27	6.4	0.76	0.9	0.26	5.81	0.58	-3.3244	0.00238435	0.00918281	Down	Full=Pollen receptor-like kinase 6; Short=AtPRK6; Flags: Precursor [Arabidopsis thaliana]
2056	Bni07T010765	520	398	95	96	91	38.16	28.64	7.17	6.64	7.79	24.6567	7.215	-1.7729	0.00631184	0.0210757	Down	Full=Pollen-specific leucine-rich repeat extensin-like protein 1; Short=AtPEX1; Short=Pollen-specific LRR/EXTENSIN1; AltName: Full=Cell wall hydroxyproline-rich glycoprotein; Flags: Precursor [Arabidopsis thaliana]
1830	Bni06T009571	596	417	19	1	1	43.74	30.01	1.43	0.07	0.09	25.06	0.08	-8.2912	8.83e-09	1.34e-07	Down	Full=Pollen-specific leucine-rich repeat extensin-like protein 3; Short=AtPEX3; Short=Pollen-specific LRR/EXTENSIN3; AltName: Full=Cell wall hydroxyproline-rich glycoprotein; Flags: Precursor [Arabidopsis thaliana]
2050	Bni07T010725	1092	1057	1080	1983	2166	80.14	76.06	81.56	137.07	185.33	79.2533	161.2	1.0243	1.93e-07	2.24e-06	Up	Full=Poly(U)-specific endoribonuclease-A; AltName: Full=Protein endoU-A; AltName: Full=Uridylate-specific endoribonuclease-A; AltName: Full=XendoU-A [Xenopus laevis]
38	Bni01T000300	817	680	300	325	158	59.96	48.93	22.66	22.47	13.52	43.85	17.995	-1.285	0.00595455	0.0201199	Down	Full=Polyadenylate-binding protein 3; Short=PABP-3; Short=Poly(A)-binding protein 3 [Arabidopsis thaliana]
1420	Bni05T007393	8720	9299	7596	28256	10872	639.94	669.16	573.65	1953.16	930.24	627.583	1441.7	1.1999	0.000154846	0.000871793	Up	Full=Polyadenylate-binding protein 6; Short=PABP-6; Short=Poly(A)-binding protein 6 [Arabidopsis thaliana]
2841	Bni10T015000	28	17	12	68	163	2.05	1.22	0.91	4.7	13.95	1.39333	9.325	2.7426	5.39e-05	0.000345701	Up	Full=Polyadenylate-binding protein-interacting protein 2; Short=PABP-interacting protein 2; Short=Poly(A)-binding protein-interacting protein 2; AltName: Full=PAM2-containing protein CID2; AltName: Full=Protein CTC-INTERACTING DOMAIN 2 [Arabidopsis thaliana]
1551	Bni05T008028	627	550	523	131	126	46.01	39.58	39.5	9.06	10.78	41.6967	9.92	-2.0715	2.22e-20	1.62e-18	Down	Full=Polyadenylate-binding protein-interacting protein 5; Short=PABP-interacting protein 5; Short=Poly(A)-binding protein-interacting protein 5; AltName: Full=PAM2-containing protein CID5; AltName: Full=Protein CTC-INTERACTING DOMAIN 5; AltName: Full=Protein INCREASED POLYPLOIDY LEVEL IN DARKNESS 1 [Arabidopsis thaliana]
1657	Bni06T008691	280	264	243	127	102	20.55	19	18.35	8.78	8.73	19.3	8.755	-1.1404	8.11e-07	8.15e-06	Down	Full=Polyamine transporter RMV1; AltName: Full=Protein RESISTANT TO METHYL VIOLOGEN 1 [Arabidopsis thaliana]
2956	Bni11T015768	54	26	22	0	0	3.96	1.87	1.66	0	0	2.49667	0.001	-11.2858	7.04e-06	5.69e-05	Down	Full=Polycomb group RING finger protein 2; AltName: Full=DNA-binding protein Mel-18; AltName: Full=Melanoma nuclear protein 18; AltName: Full=RING finger protein 110; AltName: Full=Zinc finger protein 144; Short=Zfp-144 [Mus musculus]
2726	Bni10T014471	768	766	706	333	117	56.36	55.12	53.32	23.02	10.01	54.9333	16.515	-1.7339	1.93e-06	1.78e-05	Down	Full=Polygalacturonase 1 beta-like protein 1; Short=AtPGL1; AltName: Full=Aromatic-rich glycoprotein JP630; AltName: Full=PG1beta-like protein 1; AltName: Full=Polygalacturonase 3; AltName: Full=Probable polygalacturonase non-catalytic subunit JP630; Flags: Precursor [Arabidopsis thaliana]
601	Bni02T003324	162	179	197	118	57	11.89	12.88	14.88	8.16	4.88	13.2167	6.52	-1.0194	0.00308781	0.0114874	Down	Full=Polygalacturonase At1g48100; Short=PG; AltName: Full=Pectinase At1g48100; Flags: Precursor [Arabidopsis thaliana]
2570	Bni09T013681	15	19	18	79	30	1.1	1.37	1.36	5.46	2.57	1.27667	4.015	1.653	0.0056007	0.0191452	Up	Full=Polygalacturonase At1g48100; Short=PG; AltName: Full=Pectinase At1g48100; Flags: Precursor [Arabidopsis thaliana]
3133	Bni12T016828	89	132	147	996	428	6.53	9.5	11.1	68.85	36.62	9.04333	52.735	2.5438	1.32e-11	3.22e-10	Up	Full=Polygalacturonase inhibitor; AltName: Full=Polygalacturonase-inhibiting protein; Short=PGIG; Flags: Precursor [Pyrus communis]
3135	Bni12T016830	1666	2536	2793	409	146	122.26	182.49	210.93	28.27	12.49	171.893	20.38	-3.0763	3.87e-15	1.57e-13	Down	Full=Polygalacturonase inhibitor; AltName: Full=Polygalacturonase-inhibiting protein; Short=PGIG; Flags: Precursor [Pyrus communis]
3134	Bni12T016829	4225	6152	7005	2236	814	310.06	442.7	529.02	154.56	69.65	427.26	112.105	-1.9303	3.46e-07	3.78e-06	Down	Full=Polygalacturonase inhibitor; AltName: Full=Polygalacturonase-inhibiting protein; Short=PGIG; Flags: Precursor [Vitis vinifera]
3136	Bni12T016832	6	6	8	93	42	0.44	0.43	0.6	6.43	3.59	0.49	5.01	3.354	2.54e-07	2.87e-06	Up	Full=Polygalacturonase inhibitor; AltName: Full=Polygalacturonase-inhibiting protein; Short=PGIG; Flags: Precursor [Vitis vinifera]
1396	Bni05T007284	8451	6844	4168	189	85	620.2	492.5	314.77	13.06	7.27	475.823	10.165	-5.5487	1.31e-49	4.8e-47	Down	Full=Polygalacturonase QRT3; Short=AtQRT3; Short=PG QRT3; AltName: Full=Pectinase QRT3; AltName: Full=Protein QUARTET 3; Flags: Precursor [Arabidopsis thaliana]
1725	Bni06T009050	198	288	279	0	0	14.53	20.72	21.07	0	0	18.7733	0.001	-14.1964	2.48e-12	6.77e-11	Down	Full=Polygalacturonase; Short=PG; AltName: Full=Pectinase; Flags: Precursor [Actinidia deliciosa]
1726	Bni06T009051	46	53	66	3	0	3.38	3.81	4.98	0.21	0	4.05667	0.105	-5.2718	2.54e-07	2.87e-06	Down	Full=Polygalacturonase; Short=PG; AltName: Full=Pectinase; Flags: Precursor [Actinidia deliciosa]
2850	Bni10T015055	6	5	8	0	0	0.44	0.36	0.6	0	0	0.466667	0.001	-8.8662	0.0145296	0.0418351	Down	Full=Polygalacturonase; Short=PG; AltName: Full=Pectinase; Flags: Precursor [Actinidia deliciosa]
2851	Bni10T015056	216	150	106	24	8	15.85	10.79	8.01	1.66	0.68	11.55	1.17	-3.3033	3.79e-09	6.11e-08	Down	Full=Polygalacturonase; Short=PG; AltName: Full=Pectinase; Flags: Precursor [Actinidia deliciosa]
2746	Bni10T014540	3160	2698	2233	549	342	231.9	194.15	168.64	37.95	29.26	198.23	33.605	-2.5604	2.06e-28	2.82e-26	Down	Full=Polynucleotide 5'-hydroxyl-kinase NOL9; AltName: Full=Nucleolar protein 9 homolog [Arabidopsis thaliana]
1844	Bni06T009625	689	599	491	1655	2117	50.56	43.1	37.08	114.4	181.14	43.58	147.77	1.7616	4.55e-10	8.56e-09	Up	Full=Polyol transporter 5; AltName: Full=Protein POLYOL TRANSPORTER 5; Short=AtPLT5; AltName: Full=Sugar-proton symporter PLT5 [Arabidopsis thaliana]
2309	Bni08T012171	609	530	453	91	103	44.69	38.14	34.21	6.29	8.81	39.0133	7.55	-2.3694	1.67e-17	8.75e-16	Down	Full=Polyol transporter 5; AltName: Full=Protein POLYOL TRANSPORTER 5; Short=AtPLT5; AltName: Full=Sugar-proton symporter PLT5 [Arabidopsis thaliana]
1309	Bni05T006895	4271	5852	6131	36559	14672	313.44	421.11	463.01	2527.1	1255.38	399.187	1891.24	2.2442	7.49e-12	1.9e-10	Up	Full=Polyphenol oxidase, chloroplastic; Short=PPO; AltName: Full=Catechol oxidase; Flags: Precursor [Malus domestica]
1310	Bni05T006896	275	352	383	8932	3387	20.18	25.33	28.92	617.41	289.8	24.81	453.605	4.1924	9.12e-34	1.75e-31	Up	Full=Polyphenol oxidase, chloroplastic; Short=PPO; AltName: Full=Catechol oxidase; Flags: Precursor [Malus domestica]
1360	Bni05T007110	5652	5737	4904	2341	912	414.79	412.84	370.35	161.82	78.03	399.327	119.925	-1.7354	4.33e-08	5.72e-07	Down	Full=Polyphenol oxidase, chloroplastic; Short=PPO; AltName: Full=Catechol oxidase; Flags: Precursor [Malus domestica]
1853	Bni06T009666	1733	1836	2187	5463	2355	127.18	132.12	165.16	377.62	201.5	141.487	289.56	1.0332	0.000508336	0.0024397	Up	Full=Polyphenol oxidase, chloroplastic; Short=PPO; AltName: Full=Catechol oxidase; Flags: Precursor [Malus domestica]
2640	Bni10T014079	186	299	354	1137	457	13.65	21.52	26.73	78.59	39.1	20.6333	58.845	1.5119	0.000188127	0.00103752	Up	Full=Polyphenol oxidase, chloroplastic; Short=PPO; AltName: Full=Catechol oxidase; Flags: Precursor [Malus domestica]
1215	Bni04T006408	894	1075	1239	470	450	65.61	77.36	93.57	32.49	38.5	78.8467	35.495	-1.1514	4.38e-07	4.71e-06	Down	Full=Polyribonucleotide nucleotidyltransferase 2, mitochondrial; Short=AtmtPNPase; AltName: Full=Polynucleotide phosphorylase 2; Short=PNPase 2; Flags: Precursor [Arabidopsis thaliana]
1186	Bni04T006279	10	18	6	52	26	0.73	1.3	0.45	3.59	2.22	0.826667	2.905	1.8132	0.0139156	0.0404109	Up	Full=Polyvinylalcohol dehydrogenase; Short=PVA dehydrogenase; Short=PVADH; AltName: Full=Polyvinyl alcohol dehydrogenase (cytochrome); Flags: Precursor [Sphingopyxis sp. 113P3]
2830	Bni10T014935	2028	1891	1778	787	602	148.83	136.08	134.28	54.4	51.51	139.73	52.955	-1.3998	1.26e-21	1.03e-19	Down	Full=Post-GPI attachment to proteins factor 3; AltName: Full=PER1-like domain-containing protein 1; Flags: Precursor [Xenopus laevis]
151	Bni01T000933	177	182	139	51	34	12.99	13.1	10.5	3.53	2.91	12.1967	3.22	-1.9214	5.46e-09	8.56e-08	Down	Full=Potassium channel AKT1 [Arabidopsis thaliana]
1910	Bni06T009975	723	732	714	2541	3080	53.06	52.67	53.92	175.64	263.53	53.2167	219.585	2.0448	5.14e-19	3.29e-17	Up	Full=Potassium channel AKT2/3 [Arabidopsis thaliana]
2781	Bni10T014710	180	186	204	306	1250	13.21	13.38	15.41	21.15	106.95	14	64.05	2.1938	0.000213719	0.00115542	Up	Full=Potassium channel KOR1; AltName: Full=K(+) outward-rectifying channel 1 [Oryza sativa Japonica Group]
1082	Bni04T005839	644	895	942	239	152	47.26	64.4	71.14	16.52	13.01	60.9333	14.765	-2.0451	7.03e-15	2.74e-13	Down	Full=Potassium inward rectifier (Kir)-like channel 3; Short=AtKCO3 [Arabidopsis thaliana]
504	Bni02T002787	680	607	437	178	327	49.9	43.68	33	12.3	27.98	42.1933	20.14	-1.067	0.0101118	0.0310233	Down	Full=Potassium transporter 1; Short=AtKT1; Short=AtKUP1; Short=AtPOT1 [Arabidopsis thaliana]
1778	Bni06T009336	15	10	5	104	33	1.1	0.72	0.38	7.19	2.82	0.733333	5.005	2.7708	0.000262662	0.00138154	Up	Full=Potassium transporter 5; AltName: Full=OsHAK5 [Oryza sativa Japonica Group]
1779	Bni06T009337	182	162	78	62	34	13.36	11.66	5.89	4.29	2.91	10.3033	3.6	-1.517	0.00249285	0.00954743	Down	Full=Potassium transporter 5; Short=AtHAK1; Short=AtHAK5; Short=AtPOT5 [Arabidopsis thaliana]
1201	Bni04T006360	538	482	403	1066	1339	39.48	34.68	30.43	73.69	114.57	34.8633	94.13	1.4329	1.87e-07	2.17e-06	Up	Full=Potassium transporter 8; Short=AtHAK8; Short=AtPOT8 [Arabidopsis thaliana]
794	Bni03T004396	43	38	15	100	72	3.16	2.73	1.13	6.91	6.16	2.34	6.535	1.4817	0.00882821	0.0278367	Up	Full=PR5-like receptor kinase; Flags: Precursor [Arabidopsis thaliana]
2428	Bni09T012989	119	123	88	317	210	8.73	8.85	6.65	21.91	17.97	8.07667	19.94	1.3038	3.92e-06	3.38e-05	Up	Full=PR5-like receptor kinase; Flags: Precursor [Arabidopsis thaliana]
3417	Bni13T018223	74	46	48	95	150	5.43	3.31	3.62	6.57	12.83	4.12	9.7	1.2353	0.0109009	0.033022	Up	Full=PR5-like receptor kinase; Flags: Precursor [Arabidopsis thaliana]
793	Bni03T004392	9	5	10	45	102	0.66	0.36	0.76	3.11	8.73	0.593333	5.92	3.3187	7.67e-06	6.15e-05	Up	Full=Premnaspirodiene oxygenase; Short=HPO; AltName: Full=Cytochrome P450 71D55 [Hyoscyamus muticus]
2842	Bni10T015014	236	192	107	2	0	17.32	13.82	8.08	0.14	0	13.0733	0.07	-7.5451	5.76e-11	1.26e-09	Down	Full=Pre-mRNA-splicing factor ATP-dependent RNA helicase DEAH1; AltName: Full=DEAH RNA helicase homolog PRP2; AltName: Full=Protein EMBRYO DEFECTIVE 2733; AltName: Full=Protein ENHANCED SILENCING PHENOTYPE 3 [Arabidopsis thaliana]
3073	Bni12T016487	3	14	17	0	0	0.22	1.01	1.28	0	0	0.836667	0.001	-9.7085	0.00360777	0.0131443	Down	Full=Pre-mRNA-splicing factor CLF1 [Paracoccidioides brasiliensis]
3604	BniUnT019285	152	167	156	5	0	11.15	12.02	11.78	0.35	0	11.65	0.175	-6.0568	3.21e-16	1.5e-14	Down	Full=Preprotein translocase subunit SECY, chloroplastic; AltName: Full=CpSecY; Flags: Precursor [Oryza sativa Japonica Group]
3064	Bni12T016391	194	216	169	58	78	14.24	15.54	12.76	4.01	6.67	14.18	5.34	-1.4089	5.47e-05	0.00034996	Down	Full=Presenilin-like protein At1g08700 [Arabidopsis thaliana]
2980	Bni11T015883	605	571	533	196	81	44.4	41.09	40.25	13.55	6.93	41.9133	10.24	-2.0332	3.86e-10	7.3e-09	Down	Full=Primary amine oxidase; AltName: Full=Amine oxidase [copper-containing]; Flags: Precursor [Pisum sativum]
873	Bni03T004754	199	188	119	1	3	14.6	13.53	8.99	0.07	0.26	12.3733	0.165	-6.2286	1.93e-14	7.05e-13	Down	Full=Probable (S)-N-methylcoclaurine 3'-hydroxylase isozyme 2; AltName: Full=Cytochrome P450 80B2 [Coptis japonica]
2137	Bni07T011212	3	4	8	87	38	0.22	0.29	0.6	6.01	3.25	0.37	4.63	3.6454	1.44e-06	1.36e-05	Up	Full=Probable (S)-N-methylcoclaurine 3'-hydroxylase isozyme 2; AltName: Full=Cytochrome P450 80B2 [Coptis japonica]
2139	Bni07T011214	7	4	2	2	423	0.51	0.29	0.15	0.14	36.19	0.316667	18.165	5.8421	0.00314969	0.0116874	Up	Full=Probable (S)-N-methylcoclaurine 3'-hydroxylase isozyme 2; AltName: Full=Cytochrome P450 80B2 [Coptis japonica]
2140	Bni07T011216	0	0	0	34	698	0	0	0	2.35	59.72	0.001	31.035	14.9216	0.00119873	0.00512261	Up	Full=Probable (S)-N-methylcoclaurine 3'-hydroxylase isozyme 2; AltName: Full=Cytochrome P450 80B2 [Coptis japonica]
3123	Bni12T016766	47	67	49	132	173	3.45	4.82	3.7	9.12	14.8	3.99	11.96	1.5838	7.35e-05	0.000456012	Up	Full=Probable 1-deoxy-D-xylulose-5-phosphate synthase 2, chloroplastic; Short=1-deoxyxylulose-5-phosphate synthase; Short=DXP synthase; Short=DXPS; Flags: Precursor [Oryza sativa Japonica Group]
2998	Bni11T015985	754	772	767	1654	2352	55.33	55.55	57.92	114.33	201.24	56.2667	157.785	1.4876	1.06e-07	1.29e-06	Up	Full=Probable 1-deoxy-D-xylulose-5-phosphate synthase, chloroplastic; Short=1-deoxyxylulose-5-phosphate synthase; Short=DXP synthase; Short=DXPS; AltName: Full=CapTKT2; Flags: Precursor [Capsicum annuum]
1954	Bni07T010239	458	422	384	50	33	33.61	30.37	29	3.46	2.82	30.9933	3.14	-3.3031	7.63e-35	1.59e-32	Down	Full=Probable 2-oxoglutarate-dependent dioxygenase At3g111800 [Arabidopsis thaliana]
3589	Bni14T019157	62	57	26	10	2	4.55	4.1	1.96	0.69	0.17	3.53667	0.43	-3.04	0.000294879	0.00152681	Down	Full=Probable acyl-activating enzyme 2; AltName: Full=AMP-binding protein 2; Short=AtAMPBP2 [Arabidopsis thaliana]
104	Bni01T000745	343	413	314	751	1429	25.17	29.72	23.71	51.91	122.27	26.2	87.09	1.7329	7.71e-06	6.17e-05	Up	Full=Probable acyl-activating enzyme 6; AltName: Full=AMP-binding protein 6; Short=AtAMPBP6 [Arabidopsis thaliana]
1879	Bni06T009839	98	79	91	356	259	7.19	5.68	6.87	24.61	22.16	6.58	23.385	1.8294	7.22e-13	2.13e-11	Up	Full=Probable acyl-activating enzyme 6; AltName: Full=AMP-binding protein 6; Short=AtAMPBP6 [Arabidopsis thaliana]
2753	Bni10T014584	879	869	865	397	290	64.51	62.53	65.33	27.44	24.81	64.1233	26.125	-1.2954	6.36e-17	3.2e-15	Down	Full=Probable aldehyde dehydrogenase; AltName: Full=Flax-inducible sequence 1 [Linum usitatissimum]
1642	Bni06T008597	4768	3597	2084	256	118	349.91	258.84	157.38	17.7	10.1	255.377	13.9	-4.1995	1.41e-25	1.58e-23	Down	Full=Probable alkaline/neutral invertase B; Short=A/N-INVB [Arabidopsis thaliana]
1069	Bni04T005787	3164	2423	1487	255	242	232.2	174.36	112.3	17.63	20.71	172.953	19.17	-3.1735	2.97e-20	2.14e-18	Down	Full=Probable alpha,alpha-trehalose-phosphate synthase [UDP-forming] 7; AltName: Full=Trehalose-6-phosphate synthase 7; Short=AtTPS7 [Arabidopsis thaliana]
2735	Bni10T014485	1168	1003	749	2023	2035	85.72	72.18	56.56	139.84	174.12	71.4867	156.98	1.1348	6.84e-06	5.54e-05	Up	Full=Probable alpha,alpha-trehalose-phosphate synthase [UDP-forming] 9; AltName: Full=Trehalose-6-phosphate synthase 9; Short=AtTPS9 [Arabidopsis thaliana]
1641	Bni06T008585	290	281	246	54	37	21.28	20.22	18.58	3.73	3.17	20.0267	3.45	-2.5373	6.63e-20	4.65e-18	Down	Full=Probable amidase At4g34880 [Arabidopsis thaliana]
2987	Bni11T015928	1858	1109	302	0	0	136.35	79.8	22.81	0	0	79.6533	0.001	-16.2814	2.12e-11	4.96e-10	Down	Full=Probable aquaporin NIP7-1; AltName: Full=NOD26-like intrinsic protein 7-1; Short=AtNIP7;1 [Arabidopsis thaliana]
1031	Bni04T005584	189	129	16	0	0	13.87	9.28	1.21	0	0	8.12	0.001	-12.9873	1.93e-07	2.24e-06	Down	Full=Probable aquaporin NIP-type; AltName: Full=Pollen-specific membrane integral protein [Nicotiana alata]
2029	Bni07T010629	54	66	59	14	8	3.96	4.75	4.46	0.97	0.68	4.39	0.825	-2.4118	4.39e-06	3.73e-05	Down	Full=Probable aquaporin TIP2-2; AltName: Full=Tonoplast intrinsic protein 2-2; Short=AtTIP2;2 [Arabidopsis thaliana]
1377	Bni05T007205	2050	2328	2190	955	703	150.44	167.52	165.39	66.01	60.15	161.117	63.08	-1.3529	5.57e-23	5.04e-21	Down	Full=Probable arabinosyltransferase ARAD1; AltName: Full=Arabinan alpha-1,5-arabinosyltransferase; AltName: Full=L-Arabinosyltransferase; AltName: Full=Protein ARABINAN DEFICIENT 1 [Arabidopsis thaliana]
2598	Bni09T013822	877	816	669	366	275	64.36	58.72	50.52	25.3	23.53	57.8667	24.415	-1.245	1.29e-09	2.27e-08	Down	Full=Probable arabinosyltransferase ARAD1; AltName: Full=Arabinan alpha-1,5-arabinosyltransferase; AltName: Full=L-Arabinosyltransferase; AltName: Full=Protein ARABINAN DEFICIENT 1 [Arabidopsis thaliana]
2796	Bni10T014772	830	980	1139	1716	3182	60.91	70.52	86.02	118.62	272.26	72.4833	195.44	1.431	0.000116372	0.000680694	Up	Full=Probable auxin efflux carrier component 1c; Short=OsPIN1c; AltName: Full=OsPIN1a [Oryza sativa Japonica Group]
1268	Bni05T006717	7244	6033	4023	2	0	531.62	434.14	303.82	0.14	0	423.193	0.07	-12.5617	2.08e-31	3.55e-29	Down	Full=Probable beta-1,3-galactosyltransferase 8 [Arabidopsis thaliana]
1620	Bni06T008483	72	86	80	268	114	5.28	6.19	6.04	18.53	9.75	5.83667	14.14	1.2766	0.000951289	0.00421323	Up	Full=Probable beta-D-xylosidase 2; Short=AtBXL2; Flags: Precursor [Arabidopsis thaliana]
3487	Bni14T018665	501	523	413	702	1210	36.77	37.64	31.19	48.52	103.53	35.2	76.025	1.1109	0.00178557	0.00717759	Up	Full=Probable beta-D-xylosidase 6; Short=AtBXL6; Flags: Precursor [Arabidopsis thaliana]
424	Bni02T002418	776	562	182	0	0	56.95	40.44	13.74	0	0	37.0433	0.001	-15.1769	4.5e-13	1.36e-11	Down	Full=Probable beta-glucosidase J; AltName: Full=Beta-D-glucoside glucohydrolase J; AltName: Full=Cellobiase J; AltName: Full=Gentiobiase J [Aspergillus nidulans FGSC A4]
3018	Bni11T016131	16	14	16	81	27	1.17	1.01	1.21	5.6	2.31	1.13	3.955	1.8074	0.00475168	0.0166381	Up	Full=Probable bifunctional TENA-E protein; AltName: Full=Aminopyrimidine aminohydrolase; AltName: Full=Formylaminopyrimidine amidohydrolase; AltName: Full=Formylaminopyrimidine deformylase; AltName: Full=Seed maturation protein PM36 [Glycine max]
343	Bni01T001797	522	413	323	29	12	38.31	29.72	24.39	2	1.03	30.8067	1.515	-4.3459	5.27e-26	6.06e-24	Down	Full=Probable BOI-related E3 ubiquitin-protein ligase 2; AltName: Full=RING-type E3 ubiquitin transferase BRG2 [Arabidopsis thaliana]
1604	Bni06T008373	749	583	491	2572	1631	54.97	41.95	37.08	177.79	139.55	44.6667	158.67	1.8288	3.18e-13	9.82e-12	Up	Full=Probable boron transporter 2 [Arabidopsis thaliana]
2198	Bni08T011617	9	14	3	34	47	0.66	1.01	0.23	2.35	4.02	0.633333	3.185	2.3303	0.0046334	0.0162803	Up	Full=Probable calcium-binding protein CML18; AltName: Full=Calmodulin-like protein 18 [Oryza sativa Japonica Group]
2914	Bni11T015535	252	234	255	515	525	18.49	16.84	19.26	35.6	44.92	18.1967	40.26	1.1457	1.48e-07	1.75e-06	Up	Full=Probable calcium-binding protein CML22; AltName: Full=Calmodulin-like protein 22 [Arabidopsis thaliana]
1243	Bni04T006527	30	31	41	105	91	2.2	2.23	3.1	7.26	7.79	2.51	7.525	1.584	4.84e-05	0.00031398	Up	Full=Probable calcium-binding protein CML25/26; AltName: Full=Calmodulin-like protein 25/26 [Oryza sativa Japonica Group]
3329	Bni13T017868	203	204	201	869	493	14.9	14.68	15.18	60.07	42.18	14.92	51.125	1.7768	4.92e-14	1.71e-12	Up	Full=Probable calcium-binding protein CML28; AltName: Full=Calmodulin-like protein 28 [Oryza sativa Japonica Group]
62	Bni01T000481	50	67	133	352	571	3.67	4.82	10.04	24.33	48.86	6.17667	36.595	2.5667	8.63e-07	8.61e-06	Up	Full=Probable calcium-binding protein CML29; AltName: Full=Calmodulin-like protein 29 [Oryza sativa Japonica Group]
3102	Bni12T016668	722	852	997	2610	1388	52.99	61.31	75.29	180.41	118.76	63.1967	149.585	1.243	1.54e-06	1.45e-05	Up	Full=Probable calcium-binding protein CML35; AltName: Full=Calmodulin-like protein 1; AltName: Full=Calmodulin-like protein 35 [Arabidopsis thaliana]
294	Bni01T001586	0	0	3	9	87	0	0	0.23	0.62	7.44	0.0766667	4.03	5.716	0.000481324	0.00232752	Up	Full=Probable calcium-binding protein CML41; AltName: Full=Calmodulin-like protein 41 [Arabidopsis thaliana]
265	Bni01T001441	20	19	6	10	164	1.47	1.37	0.45	0.69	14.03	1.09667	7.36	2.7466	0.0152388	0.0434426	Up	Full=Probable carbohydrate esterase At4g34215 [Arabidopsis thaliana]
402	Bni02T002243	12	10	14	44	33	0.88	0.72	1.06	3.04	2.82	0.886667	2.93	1.7244	0.00321687	0.011906	Up	Full=Probable carboxylesterase 15; AltName: Full=AtCXE15 [Arabidopsis thaliana]
3164	Bni12T016962	77	47	60	306	158	5.65	3.38	4.53	21.15	13.52	4.52	17.335	1.9393	6.84e-07	7.01e-06	Up	Full=Probable carboxylesterase 15; AltName: Full=AtCXE15 [Arabidopsis thaliana]
1148	Bni04T006080	29	18	14	1	1	2.13	1.3	1.06	0.07	0.09	1.49667	0.08	-4.2256	0.000985353	0.00433741	Down	Full=Probable carboxylesterase 17; AltName: Full=AtCXE17 [Arabidopsis thaliana]
278	Bni01T001504	164	181	154	497	435	12.04	13.02	11.63	34.35	37.22	12.23	35.785	1.5489	1.25e-14	4.64e-13	Up	Full=Probable carboxylesterase 2; AltName: Full=AtCXE2 [Arabidopsis thaliana]
765	Bni03T004272	32	48	71	123	332	2.35	3.45	5.36	8.5	28.41	3.72	18.455	2.3106	0.000184498	0.00102004	Up	Full=Probable carboxylesterase 4, mitochondrial; AltName: Full=AtCXE4; Flags: Precursor [Arabidopsis thaliana]
188	Bni01T001081	1425	979	501	57	74	104.58	70.45	37.84	3.94	6.33	70.9567	5.135	-3.7885	1.7e-15	7.12e-14	Down	Full=Probable carboxylesterase 6; AltName: Full=AtCXE6 [Arabidopsis thaliana]
2354	Bni08T012440	48	65	47	148	68	3.52	4.68	3.55	10.23	5.82	3.91667	8.025	1.0349	0.0152811	0.0435345	Up	Full=Probable carboxylesterase 8; AltName: Full=AtCXE8 [Arabidopsis thaliana]
1928	Bni07T010083	4	0	3	31	13	0.29	0	0.23	2.14	1.11	0.173333	1.625	3.2288	0.00990067	0.0304893	Up	Full=Probable cation transporter HKT6; Short=OsHKT6 [Oryza sativa Japonica Group]
35	Bni01T000287	2931	2004	927	347	268	215.1	144.21	70.01	23.99	22.93	143.107	23.46	-2.6088	6.43e-09	9.98e-08	Down	Full=Probable choline kinase 1; Short=AtCK1 [Arabidopsis thaliana]
2126	Bni07T011172	1152	664	220	112	100	84.54	47.78	16.61	7.74	8.56	49.6433	8.15	-2.6067	1.78e-05	0.000129852	Down	Full=Probable copper-transporting ATPase HMA5; AltName: Full=Probable copper-transporting ATPase 3; AltName: Full=Protein HEAVY METAL ATPASE 5 [Arabidopsis thaliana]
2733	Bni10T014482	61	34	3	1	0	4.48	2.45	0.23	0.07	0	2.38667	0.035	-6.0915	0.001579	0.00647533	Down	Full=Probable cyclic nucleotide-gated ion channel 16; AltName: Full=Cyclic nucleotide- and calmodulin-regulated ion channel 16 [Arabidopsis thaliana]
720	Bni03T004066	1168	1312	1540	5958	2532	85.72	94.41	116.3	411.84	216.65	98.81	314.245	1.6692	5.05e-08	6.59e-07	Up	Full=Probable cysteine protease RD19D; Flags: Precursor [Arabidopsis thaliana]
266	Bni01T001451	7682	6701	5144	11719	15054	563.76	482.2	388.48	810.06	1288.06	478.147	1049.06	1.1336	5.49e-05	0.000351339	Up	Full=Probable cysteine protease RD21B; Flags: Precursor [Arabidopsis thaliana]
3515	Bni14T018805	399	495	429	1239	548	29.28	35.62	32.4	85.64	46.89	32.4333	66.265	1.0308	0.00062435	0.00292339	Up	Full=Probable cysteine protease RD21B; Flags: Precursor [Arabidopsis thaliana]
1919	Bni06T010038	61	56	72	35	13	4.48	4.03	5.44	2.42	1.11	4.65	1.765	-1.3976	0.00908828	0.0284542	Down	Full=Probable cytokinin riboside 5'-monophosphate phosphoribohydrolase LOGL1; AltName: Full=Protein LONELY GUY-like 1 [Oryza sativa Japonica Group]
563	Bni02T003098	34	27	20	111	40	2.5	1.94	1.51	7.67	3.42	1.98333	5.545	1.4833	0.0101328	0.0310711	Up	Full=Probable cytokinin riboside 5'-monophosphate phosphoribohydrolase LOGL6; AltName: Full=Protein LONELY GUY-like 6 [Oryza sativa Japonica Group]
747	Bni03T004180	21	19	31	65	55	1.54	1.37	2.34	4.49	4.71	1.75	4.6	1.3943	0.0044359	0.0157096	Up	Full=Probable disease resistance protein At1g15890 [Arabidopsis thaliana]
415	Bni02T002366	847	949	930	2689	13215	62.16	68.29	70.23	185.87	1130.71	66.8933	658.29	3.2988	0.000146297	0.000829042	Up	Full=Probable disease resistance protein At1g59620; AltName: Full=CW9 [Arabidopsis thaliana]
288	Bni01T001554	389	300	224	586	1754	28.55	21.59	16.92	40.51	150.08	22.3533	95.295	2.0919	8.71e-05	0.000528624	Up	Full=Probable disease resistance protein At4g33300 [Arabidopsis thaliana]
1888	Bni06T009868	584	544	499	267	186	42.86	39.15	37.68	18.46	15.91	39.8967	17.185	-1.2151	8.53e-10	1.53e-08	Down	Full=Probable DNA helicase MCM9; AltName: Full=Minichromosome maintenance 9; Short=AtMCM9 [Arabidopsis thaliana]
1558	Bni05T008082	288	271	254	112	46	21.14	19.5	19.18	7.74	3.94	19.94	5.84	-1.7716	6.65e-07	6.83e-06	Down	Full=Probable DNA replication complex GINS protein PSF1; AltName: Full=GINS complex subunit 1 [Dictyostelium discoideum]
1618	Bni06T008474	76	84	57	145	408	5.58	6.04	4.3	10.02	34.91	5.30667	22.465	2.0818	0.000215766	0.00116503	Up	Full=Probable E3 ubiquitin ligase SUD1; AltName: Full=Protein ECERIFERUM 9; AltName: Full=Protein SUPPRESSOR OF DRY2 DEFFECTS 1; Short=AtSUD1; AltName: Full=RING-type E3 ubiquitin transferase SUD1; AltName: Full=RING/U-box domain-containing protein [Arabidopsis thaliana]
3519	Bni14T018820	2174	1801	1542	650	755	159.54	129.6	116.45	44.93	64.6	135.197	54.765	-1.3037	6.74e-07	6.92e-06	Down	Full=Probable E3 ubiquitin ligase SUD1; AltName: Full=Protein ECERIFERUM 9; AltName: Full=Protein SUPPRESSOR OF DRY2 DEFFECTS 1; Short=AtSUD1; AltName: Full=RING-type E3 ubiquitin transferase SUD1; AltName: Full=RING/U-box domain-containing protein [Arabidopsis thaliana]
2729	Bni10T014477	21	6	11	65	27	1.54	0.43	0.83	4.49	2.31	0.933333	3.4	1.8651	0.0170465	0.0476063	Up	Full=Probable E3 ubiquitin-protein ligase ATL44; AltName: Full=RING-H2 finger A3a; AltName: Full=RING-H2 finger protein ATL44; AltName: Full=RING-H2 zinc finger protein RHA3a; AltName: Full=RING-type E3 ubiquitin transferase ATL44 [Arabidopsis thaliana]
1784	Bni06T009363	51	45	45	49	424	3.74	3.24	3.4	3.39	36.28	3.46	19.835	2.5192	0.00241594	0.00929202	Up	Full=Probable E3 ubiquitin-protein ligase BAH1-like 1; AltName: Full=RING-type E3 ubiquitin transferase BAH1-like 1 [Oryza sativa Indica Group]
3160	Bni12T016930	492	298	158	127	66	36.11	21.44	11.93	8.78	5.65	23.16	7.215	-1.6826	0.00128684	0.00543328	Down	Full=Probable E3 ubiquitin-protein ligase BAH1-like; AltName: Full=RING finger protein 178; AltName: Full=RING-type E3 ubiquitin transferase BAH1-like [Arabidopsis thaliana]
2002	Bni07T010532	17	17	12	34	44	1.25	1.22	0.91	2.35	3.76	1.12667	3.055	1.4391	0.0161252	0.0455561	Up	Full=Probable E3 ubiquitin-protein ligase RHA4A; AltName: Full=RING-H2 finger A4a; AltName: Full=RING-H2 zinc finger protein RHA4a; AltName: Full=RING-type E3 ubiquitin transferase RHA4A [Arabidopsis thaliana]
65	Bni01T000499	2644	2408	2527	3135	10277	194.04	173.28	190.84	216.7	879.33	186.053	548.015	1.5585	0.00182931	0.00732276	Up	Full=Probable E3 ubiquitin-protein ligase RZFP34; AltName: Full=OsRFP1; AltName: Full=RING zinc-finger protein 34; Short=OsRZFP34 [Oryza sativa Japonica Group]
2214	Bni08T011708	269	251	249	2	2	19.74	18.06	18.8	0.14	0.17	18.8667	0.155	-6.9274	1.13e-19	7.74e-18	Down	Full=Probable F-box protein At3g61730; AltName: Full=Protein RFM; AltName: Full=Reduced male fertility protein [Arabidopsis thaliana]
1667	Bni06T008738	466	456	391	1357	885	34.2	32.81	29.53	93.8	75.72	32.18	84.76	1.3972	2.32e-13	7.28e-12	Up	Full=Probable flavin-containing monooxygenase 1 [Arabidopsis thaliana]
2928	Bni11T015623	974	691	366	48	41	71.48	49.72	27.64	3.32	3.51	49.6133	3.415	-3.8608	1.28e-17	6.91e-16	Down	Full=Probable folate-biopterin transporter 8, chloroplastic; Flags: Precursor [Arabidopsis thaliana]
2709	Bni10T014399	120	210	265	19	12	8.81	15.11	20.01	1.31	1.03	14.6433	1.17	-3.6457	1.07e-12	3.08e-11	Down	Full=Probable fructokinase-4 [Arabidopsis thaliana]
3232	Bni12T017308	22	16	12	1	0	1.61	1.15	0.91	0.07	0	1.22333	0.035	-5.1273	0.00257236	0.00981498	Down	Full=Probable fructokinase-4 [Arabidopsis thaliana]
3126	Bni12T016776	1000	891	688	1786	2998	73.39	64.12	51.96	123.46	256.52	63.1567	189.99	1.5889	7.12e-06	5.74e-05	Up	Full=Probable galactinol--sucrose galactosyltransferase 2; AltName: Full=Protein SEED IMBIBITION 2; AltName: Full=Raffinose synthase 2 [Arabidopsis thaliana]
1219	Bni04T006415	383	322	348	1018	589	28.11	23.17	26.28	70.37	50.4	25.8533	60.385	1.2238	1.51e-07	1.78e-06	Up	Full=Probable galactinol--sucrose galactosyltransferase 5; AltName: Full=Protein SEED IMBIBITION 1-LIKE; AltName: Full=Raffinose synthase 5 [Arabidopsis thaliana]
3391	Bni13T018090	164	132	112	365	268	12.04	9.5	8.46	25.23	22.93	10	24.08	1.2678	3.13e-06	2.75e-05	Up	Full=Probable galacturonosyltransferase 12; AltName: Full=Like glycosyl transferase 6; AltName: Full=Protein IRREGULAR XYLEM 8 [Arabidopsis thaliana]
1671	Bni06T008759	2824	2617	2181	755	589	207.25	188.32	164.71	52.19	50.4	186.76	51.295	-1.8643	2.01e-25	2.22e-23	Down	Full=Probable galacturonosyltransferase 3 [Arabidopsis thaliana]
1197	Bni04T006328	10	22	12	110	75	0.73	1.58	0.91	7.6	6.42	1.07333	7.01	2.7073	3.47e-07	3.78e-06	Up	Full=Probable galacturonosyltransferase-like 10; AltName: Full=Galactinol synthase 8; Short=AtGolS8; Short=GolS-8 [Arabidopsis thaliana]
2993	Bni11T015960	244	140	16	0	0	17.91	10.07	1.21	0	0	9.73	0.001	-13.2482	1.17e-07	1.41e-06	Down	Full=Probable galacturonosyltransferase-like 4; AltName: Full=Galactinol synthase 9; Short=AtGolS9; Short=GolS-9 [Arabidopsis thaliana]
3486	Bni14T018658	3400	3607	3815	1896	1329	249.52	259.56	288.11	131.06	113.71	265.73	122.385	-1.1185	1.55e-14	5.74e-13	Down	Full=Probable glucan 1,3-alpha-glucosidase; AltName: Full=Glucosidase II subunit alpha; AltName: Full=Protein PRIORITY IN SWEET LIFE 5; AltName: Full=Protein RADIAL SWELLING 3; Flags: Precursor [Arabidopsis thaliana]
656	Bni03T003668	172	157	78	0	0	12.62	11.3	5.89	0	0	9.93667	0.001	-13.2785	7.28e-10	1.32e-08	Down	Full=Probable glucan endo-1,3-beta-glucosidase A6; AltName: Full=(1->3)-beta-glucan endohydrolase; Short=(1->3)-beta-glucanase; AltName: Full=Anther-specific protein A6; AltName: Full=Beta-1,3-endoglucanase; AltName: Full=Protein MATERNAL EFFECT EMBRYO ARREST 48; Flags: Precursor [Arabidopsis thaliana]
2903	Bni11T015467	1335	1091	611	0	0	97.97	78.51	46.14	0	0	74.2067	0.001	-16.1793	1.4e-16	6.83e-15	Down	Full=Probable glucan endo-1,3-beta-glucosidase A6; AltName: Full=(1->3)-beta-glucan endohydrolase; Short=(1->3)-beta-glucanase; AltName: Full=Anther-specific protein A6; AltName: Full=Beta-1,3-endoglucanase; AltName: Full=Protein MATERNAL EFFECT EMBRYO ARREST 48; Flags: Precursor [Arabidopsis thaliana]
3107	Bni12T016697	750	552	141	46	156	55.04	39.72	10.65	3.18	13.35	35.1367	8.265	-2.0879	0.00630286	0.0210538	Down	Full=Probable glucan endo-1,3-beta-glucosidase BG3; AltName: Full=Beta-1,3-glucanase 3; Short=AtBG3; Flags: Precursor [Arabidopsis thaliana]
666	Bni03T003724	379	342	302	170	83	27.81	24.61	22.81	11.75	7.1	25.0767	9.425	-1.4118	4.84e-06	4.06e-05	Down	Full=Probable glucuronosyltransferase Os01g0926700 [Oryza sativa Japonica Group]
2878	Bni11T015308	3510	2633	1709	1008	608	257.59	189.47	129.06	69.68	52.02	192.04	60.85	-1.6581	8.28e-07	8.3e-06	Down	Full=Probable glutathione peroxidase 2 [Arabidopsis thaliana]
1755	Bni06T009249	435	407	304	1132	592	31.92	29.29	22.96	78.25	50.65	28.0567	64.45	1.1998	2.55e-05	0.000178549	Up	Full=Probable glutathione peroxidase 5 [Arabidopsis thaliana]
1112	Bni04T005946	469	424	163	2	1	34.42	30.51	12.31	0.14	0.09	25.7467	0.115	-7.8066	1.79e-15	7.47e-14	Down	Full=Probable glycosyltransferase At3g07620 [Arabidopsis thaliana]
11	Bni01T000127	877	928	942	512	311	64.36	66.78	71.14	35.39	26.61	67.4267	31	-1.1211	1.07e-08	1.58e-07	Down	Full=Probable glycosyltransferase At3g42180 [Arabidopsis thaliana]
90	Bni01T000640	927	795	625	164	170	68.03	57.21	47.2	11.34	14.55	57.48	12.945	-2.1507	1.9e-15	7.89e-14	Down	Full=Probable glycosyltransferase At5g03795 [Arabidopsis thaliana]
3037	Bni12T016247	904	868	784	480	323	66.34	62.46	59.21	33.18	27.64	62.67	30.41	-1.0432	9.66e-09	1.45e-07	Down	Full=Probable glycosyltransferase At5g03795 [Arabidopsis thaliana]
195	Bni01T001112	3399	2455	1062	7	3	249.44	176.66	80.2	0.48	0.26	168.767	0.37	-8.8333	1.89e-40	5.02e-38	Down	Full=Probable glycosyltransferase At5g20260 [Arabidopsis thaliana]
611	Bni02T003387	346	232	101	18	9	25.39	16.69	7.63	1.24	0.77	16.57	1.005	-4.0433	1.62e-10	3.25e-09	Down	Full=Probable glycosyltransferase At5g20260 [Arabidopsis thaliana]
194	Bni01T001111	114	113	100	25	12	8.37	8.13	7.55	1.73	1.03	8.01667	1.38	-2.5383	2.49e-09	4.18e-08	Down	Full=Probable glycosyltransferase At5g25310 [Arabidopsis thaliana]
318	Bni01T001697	550	490	525	300	189	40.36	35.26	39.65	20.74	16.17	38.4233	18.455	-1.058	8.41e-07	8.42e-06	Down	Full=Probable GTP-binding protein OBGC2 [Oryza sativa Japonica Group]
2176	Bni08T011491	691	635	606	347	247	50.71	45.69	45.77	23.99	21.13	47.39	22.56	-1.0708	5.14e-09	8.08e-08	Down	Full=Probable helicase CHR10; AltName: Full=Protein ALTERED SEED GERMINATION 3; AltName: Full=Protein CHROMATIN REMODELING 10 [Arabidopsis thaliana]
1152	Bni04T006099	1468	1066	445	1	0	107.73	76.71	33.61	0.07	0	72.6833	0.035	-11.0201	2.92e-13	9.07e-12	Down	Full=Probable histone acetyltransferase HAC-like 2 [Oryza sativa Japonica Group]
1153	Bni04T006100	136	92	71	0	0	9.98	6.62	5.36	0	0	7.32	0.001	-12.8376	4.01e-09	6.44e-08	Down	Full=Probable histone acetyltransferase HAC-like 2 [Oryza sativa Japonica Group]
2808	Bni10T014847	635	617	540	1570	807	46.6	44.4	40.78	108.52	69.05	43.9267	88.785	1.0152	4.72e-05	0.000306694	Up	Full=Probable inactive leucine-rich repeat receptor-like protein kinase At3g03770; Flags: Precursor [Arabidopsis thaliana]
2723	Bni10T014458	798	734	616	200	105	58.56	52.82	46.52	13.82	8.98	52.6333	11.4	-2.2069	3.49e-16	1.62e-14	Down	Full=Probable inactive poly [ADP-ribose] polymerase SRO5; AltName: Full=Protein SIMILAR TO RCD ONE 5 [Arabidopsis thaliana]
3105	Bni12T016688	108	97	86	233	154	7.93	6.98	6.49	16.11	13.18	7.13333	14.645	1.0378	0.000206606	0.001124	Up	Full=Probable inactive purple acid phosphatase 16; Flags: Precursor [Arabidopsis thaliana]
2837	Bni10T014985	206	186	95	3	5	15.12	13.38	7.17	0.21	0.43	11.89	0.32	-5.2155	5.61e-14	1.93e-12	Down	Full=Probable inactive purple acid phosphatase 24; Flags: Precursor [Arabidopsis thaliana]
2233	Bni08T011807	1721	1668	1560	4248	2428	126.3	120.03	117.81	293.64	207.75	121.38	250.695	1.0464	1.35e-07	1.61e-06	Up	Full=Probable inactive purple acid phosphatase 29; Flags: Precursor [Arabidopsis thaliana]
3509	Bni14T018776	421	410	370	153	75	30.9	29.5	27.94	10.58	6.42	29.4467	8.5	-1.7926	5.49e-10	1.01e-08	Down	Full=Probable indole-3-acetic acid-amido synthetase GH3.1; AltName: Full=Auxin-responsive GH3-like protein 1; Short=AtGH3-1 [Arabidopsis thaliana]
3510	Bni14T018780	27	40	40	0	0	1.98	2.88	3.02	0	0	2.62667	0.001	-11.359	2.04e-06	1.87e-05	Down	Full=Probable indole-3-acetic acid-amido synthetase GH3.1; AltName: Full=Auxin-responsive GH3-like protein 1; Short=AtGH3-1 [Arabidopsis thaliana]
1770	Bni06T009308	230	198	163	422	606	16.88	14.25	12.31	29.17	51.85	14.48	40.51	1.4842	1.5e-05	0.000111766	Up	Full=Probable indole-3-pyruvate monooxygenase YUCCA10; AltName: Full=Flavin-containing monooxygenase YUCCA10 [Arabidopsis thaliana]
2171	Bni08T011446	25	20	0	0	0	1.83	1.44	0	0	0	1.09	0.001	-10.0901	0.0148554	0.0425604	Down	Full=Probable indole-3-pyruvate monooxygenase YUCCA11; AltName: Full=Flavin-containing monooxygenase YUCCA11 [Arabidopsis thaliana]
57	Bni01T000445	78	112	107	0	0	5.72	8.06	8.08	0	0	7.28667	0.001	-12.831	2.22e-09	3.74e-08	Down	Full=Probable inorganic phosphate transporter 1-5; Short=OsPT5; Short=OsPht1;5; AltName: Full=H(+)/Pi cotransporter [Oryza sativa Japonica Group]
58	Bni01T000448	133	154	150	0	0	9.76	11.08	11.33	0	0	10.7233	0.001	-13.3885	1.04e-10	2.16e-09	Down	Full=Probable inorganic phosphate transporter 1-5; Short=OsPT5; Short=OsPht1;5; AltName: Full=H(+)/Pi cotransporter [Oryza sativa Japonica Group]
2083	Bni07T010940	1237	1297	1143	3167	1865	90.78	93.33	86.32	218.92	159.57	90.1433	189.245	1.07	2.38e-08	3.32e-07	Up	Full=Probable leucine-rich repeat receptor-like protein kinase At5g49770; Flags: Precursor [Arabidopsis thaliana]
605	Bni02T003348	46	42	40	130	171	3.38	3.02	3.02	8.99	14.63	3.14	11.81	1.9112	1.28e-06	1.23e-05	Up	Full=Probable leucine-rich repeat receptor-like protein kinase At5g63930; Flags: Precursor [Arabidopsis thaliana]
191	Bni01T001095	56	51	48	187	155	4.11	3.67	3.62	12.93	13.26	3.8	13.095	1.7849	1.98e-09	3.36e-08	Up	Full=Probable leucine-rich repeat receptor-like serine/threonine-protein kinase At3g14840; Flags: Precursor [Arabidopsis thaliana]
[truncated: 1,939 more rows]
